# Supplementary material
Source: PubMed Central journal article supplement (PMC10294644)

## Supplemental Information

### Mapping the Degradable Kinome Provides a Resource for Expedited Degradation Development

Katherine A. Donovan, Fleur M. Ferguson, Jonathan W. Bushman, Nicholas A. Eleuteri, Debabrata Bhunia, SeongShick Ryu, Li Tan, Kun Shi, Hong Yue, Xiaoxi Liu, Dennis Dobrovolsky, Baishan Jiang, Jinhua Wang, Mingfeng Hao, Inchul You, Mingxing Teng, Yanke Liang, John Hatcher, Zhengnian Li, Theresa D. Manz, Brian Groendyke, Wanyi Hu, Yunju Nam, Sandip Sengupta, Hanna Cho, Injae Shin, Michael P. Agius, Irene M. Ghobrial, Michelle W. Ma, Jianwei Che, Sara J. Buhrlage, Taebo Sim, Nathanael S. Gray, and Eric S. Fischer

YKL.6.102 (wp005)

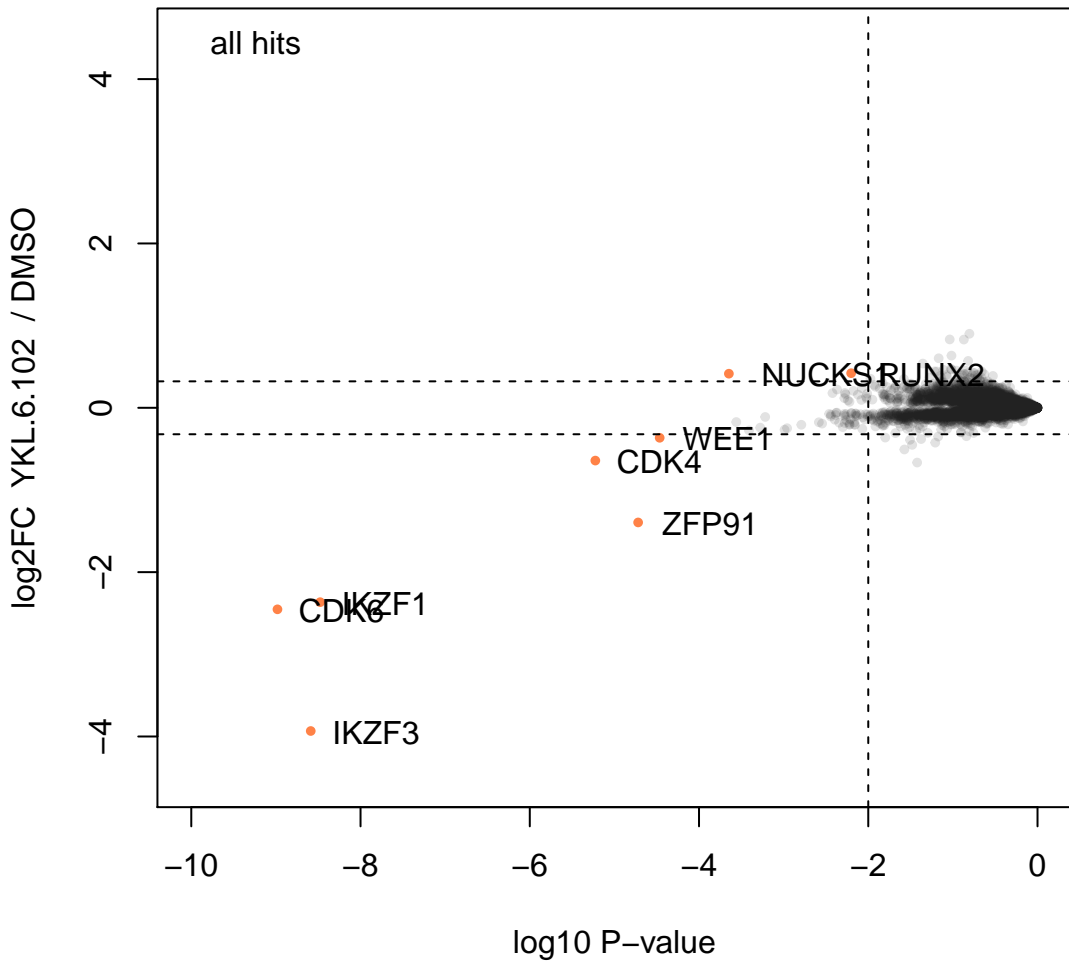

YKL.6.102 (wp005)

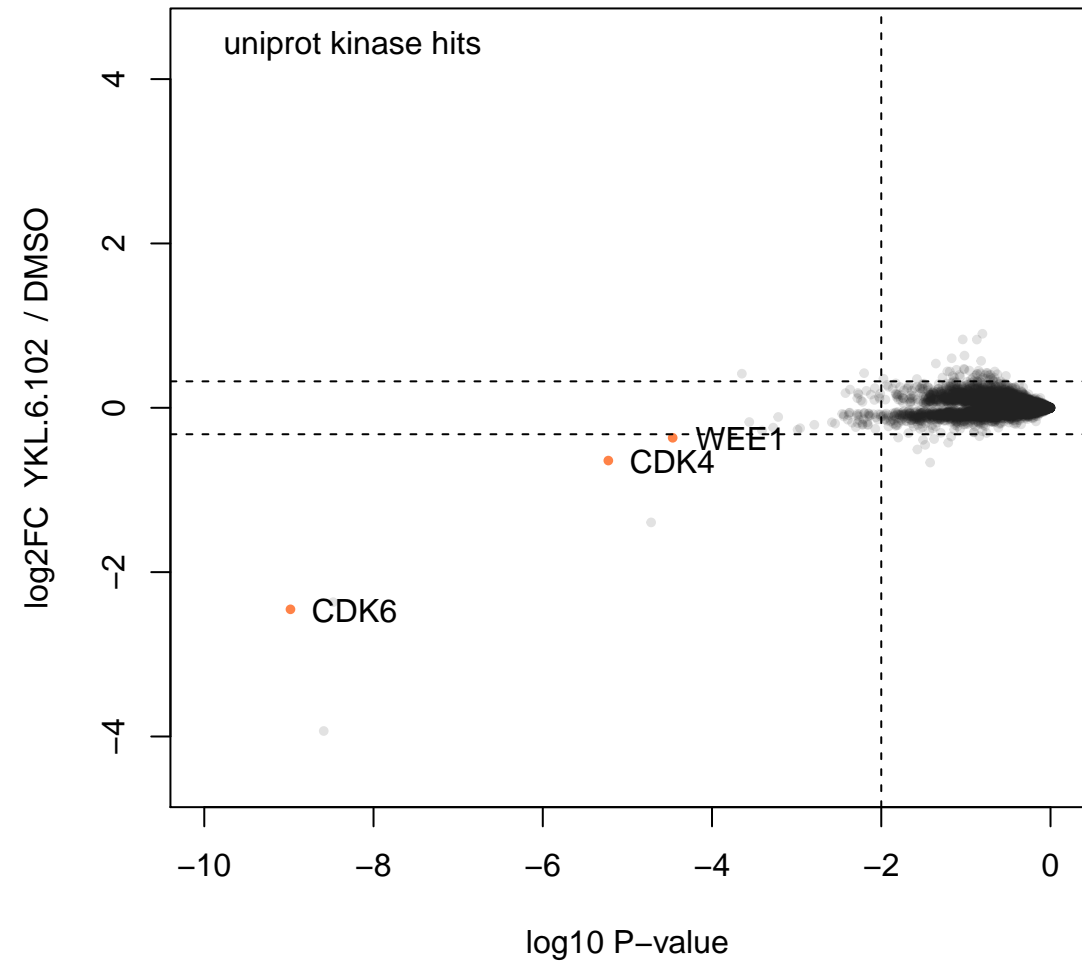



BSJ.1.096 (wp005)

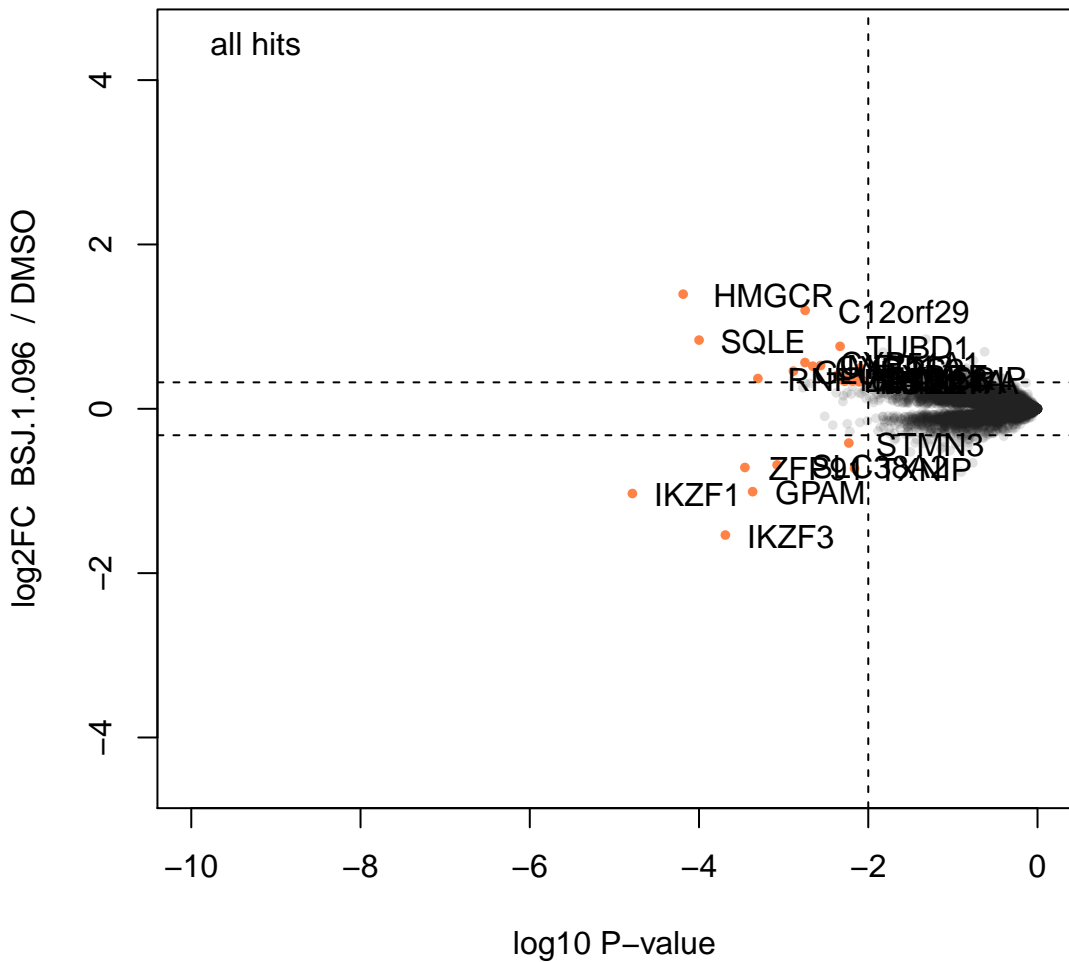

BSJ.1.096 (wp005)

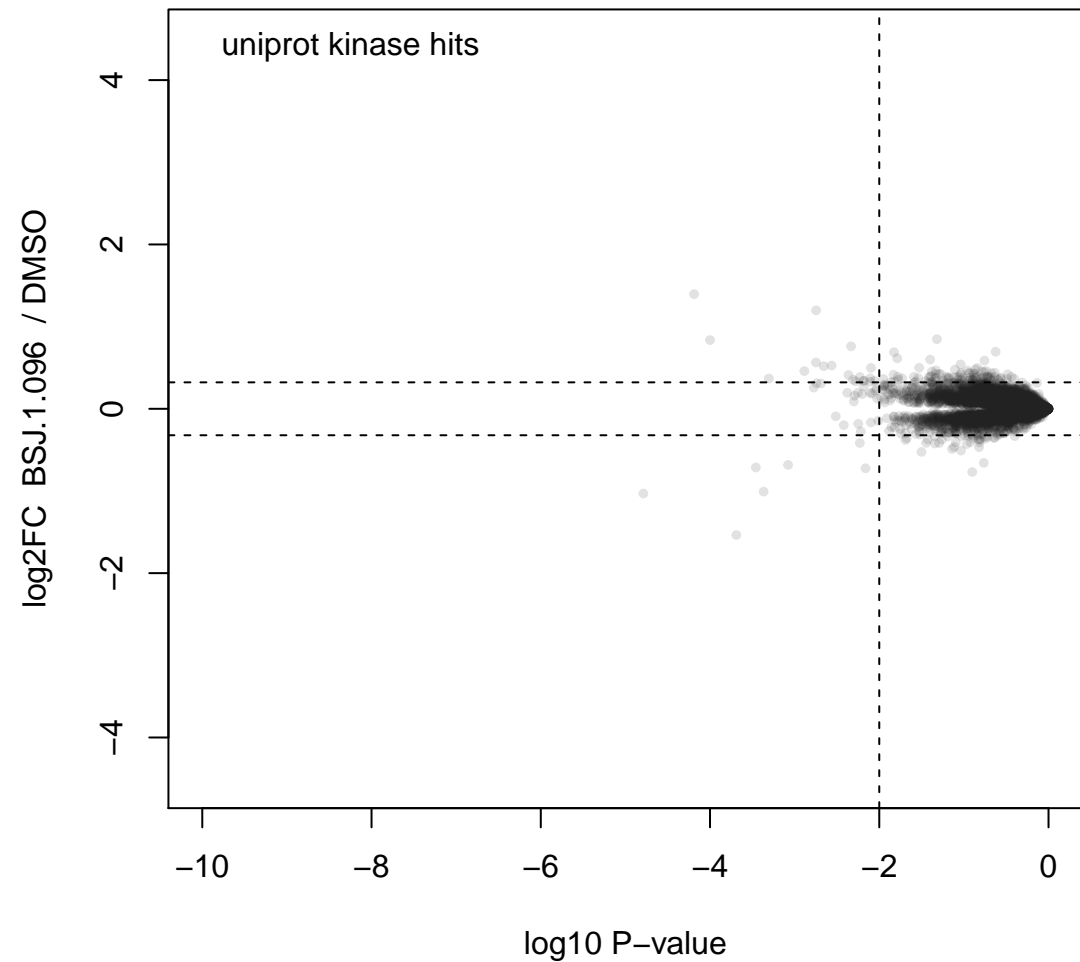

JXH.10.102 (wp005)

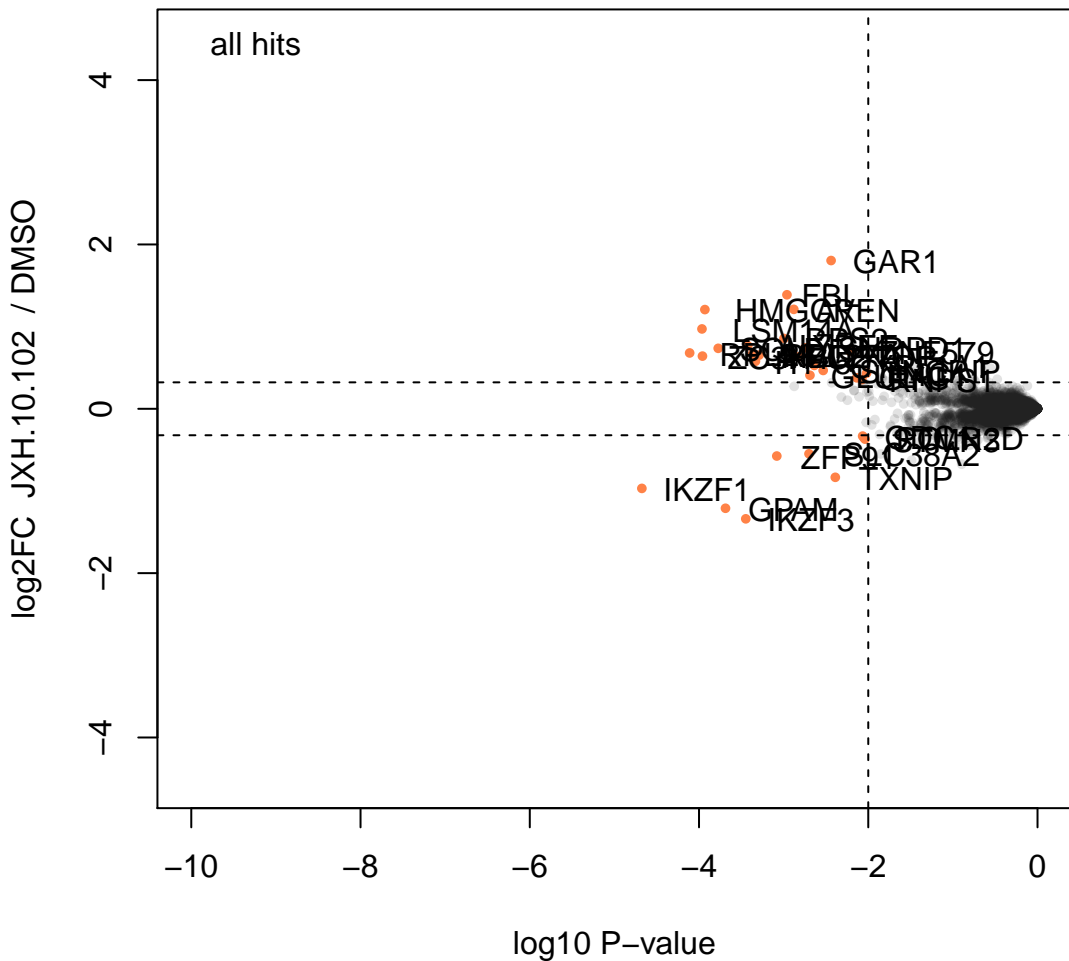

JXH.10.102 (wp005)

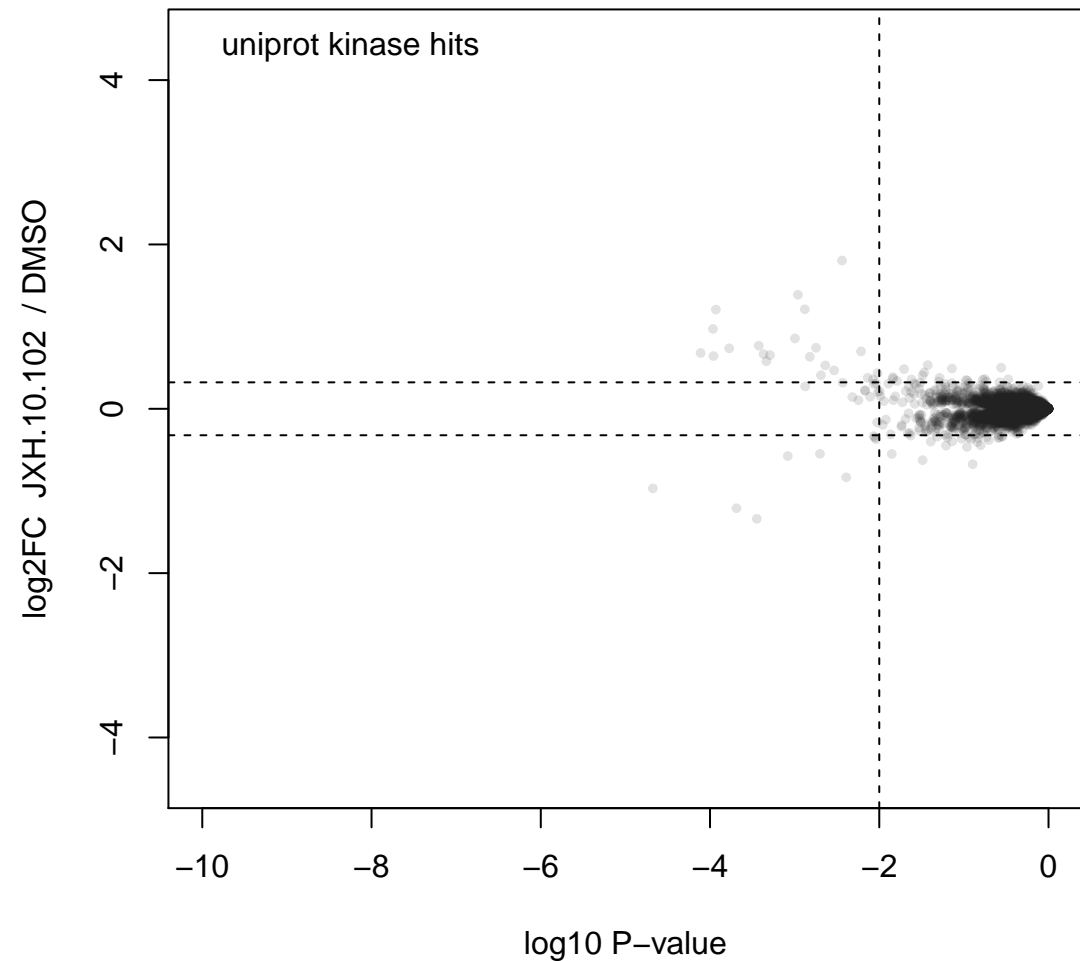

BSJ.1.147 (wp005)

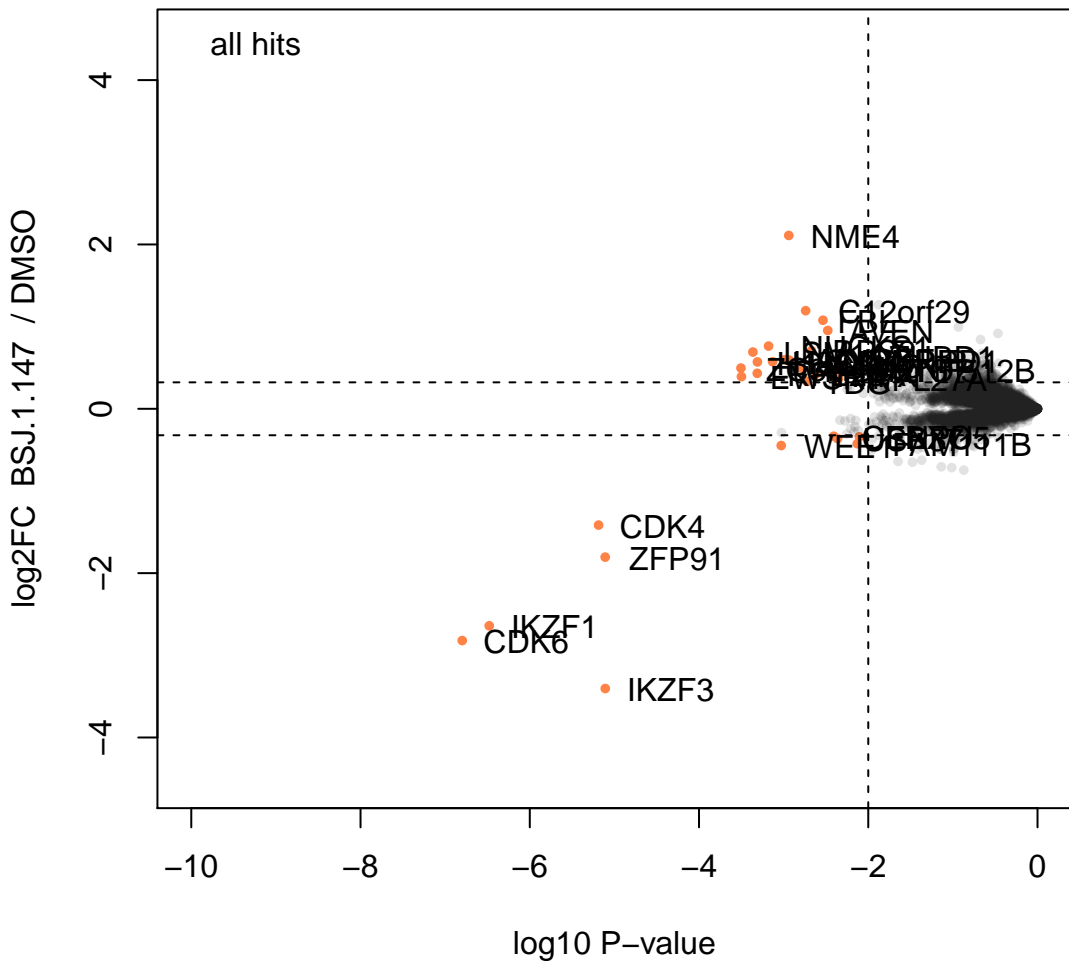

BSJ.1.147 (wp005)

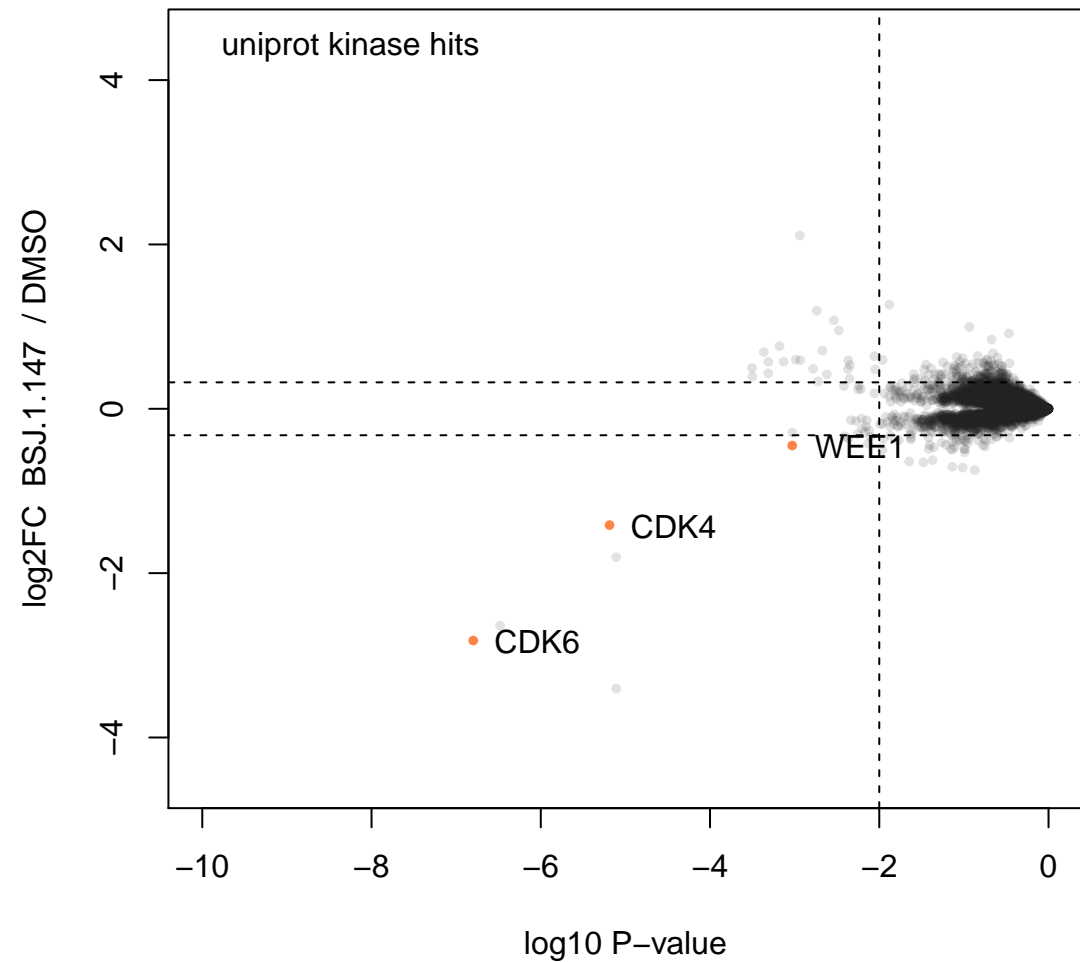

TL13.12 (wp011)

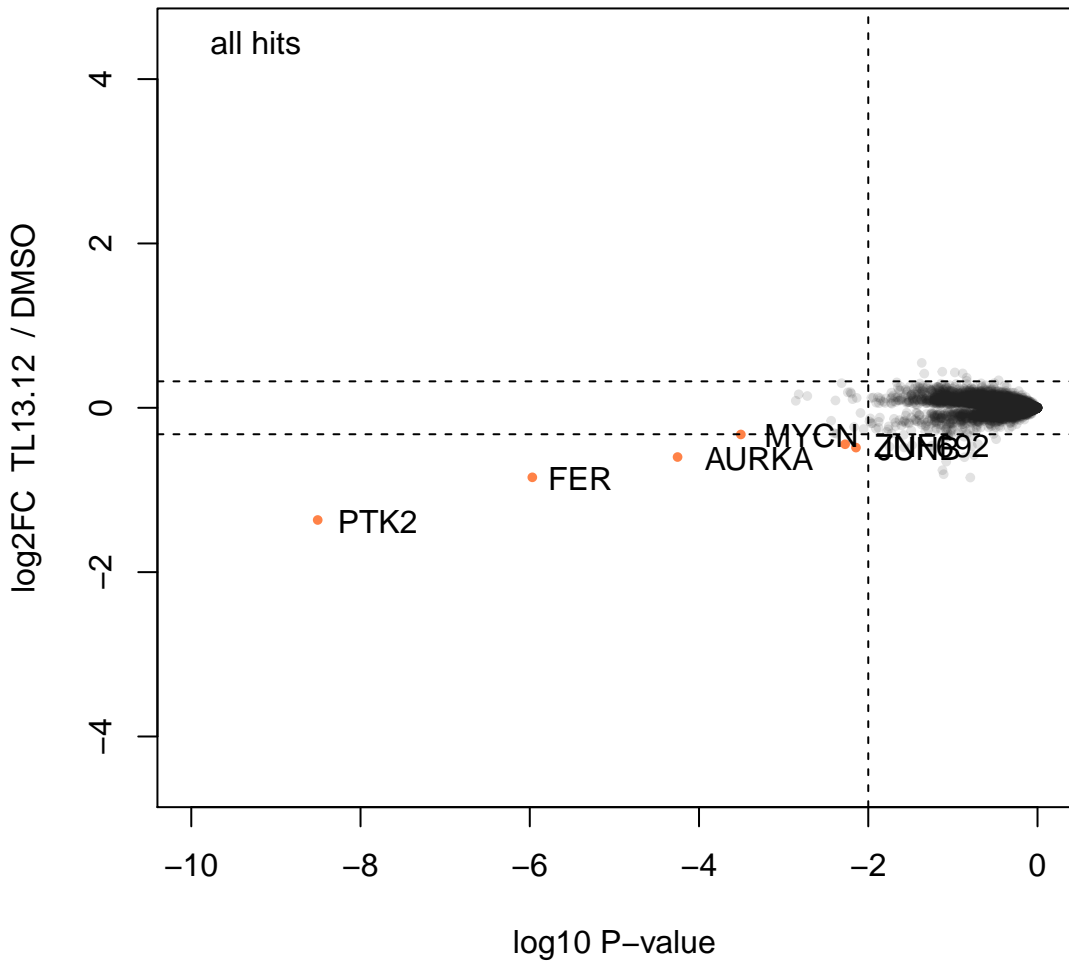

TL13.12 (wp011)

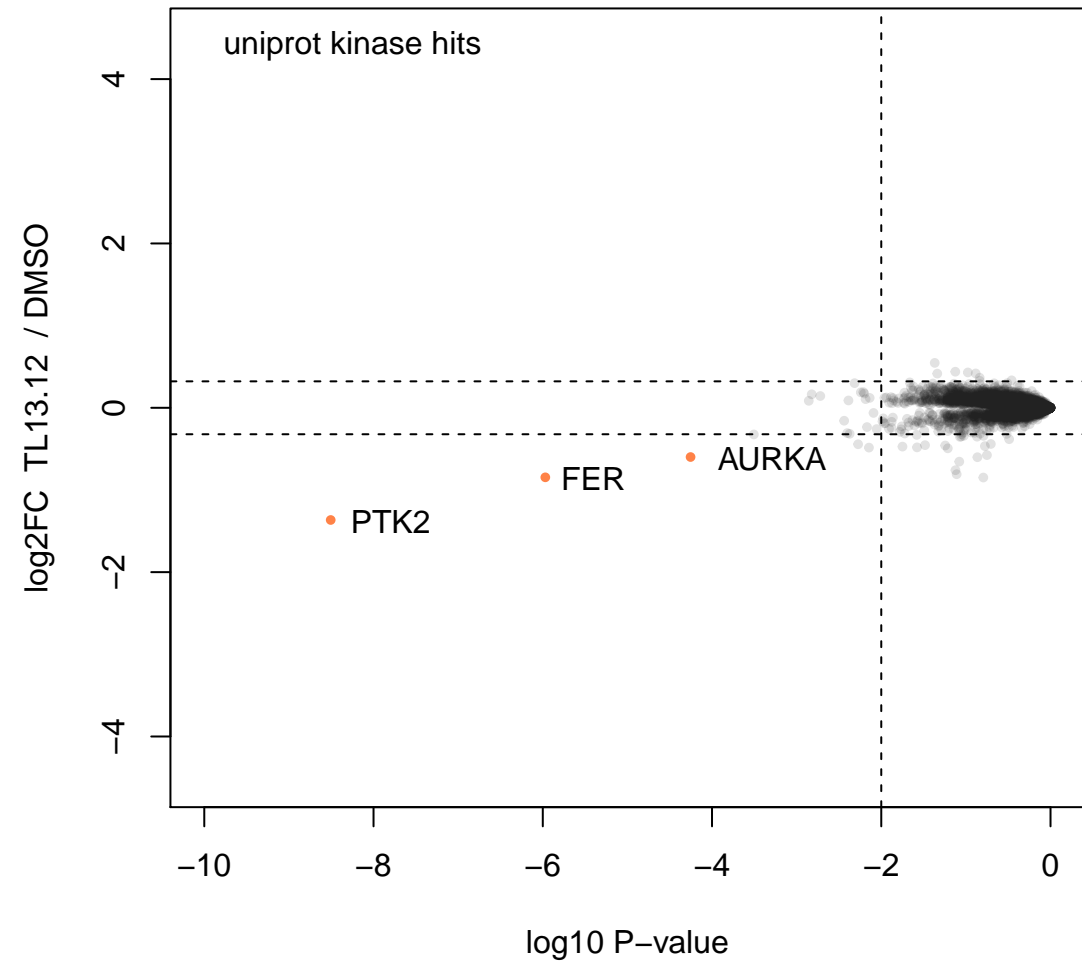

TI13.112 (wp012)

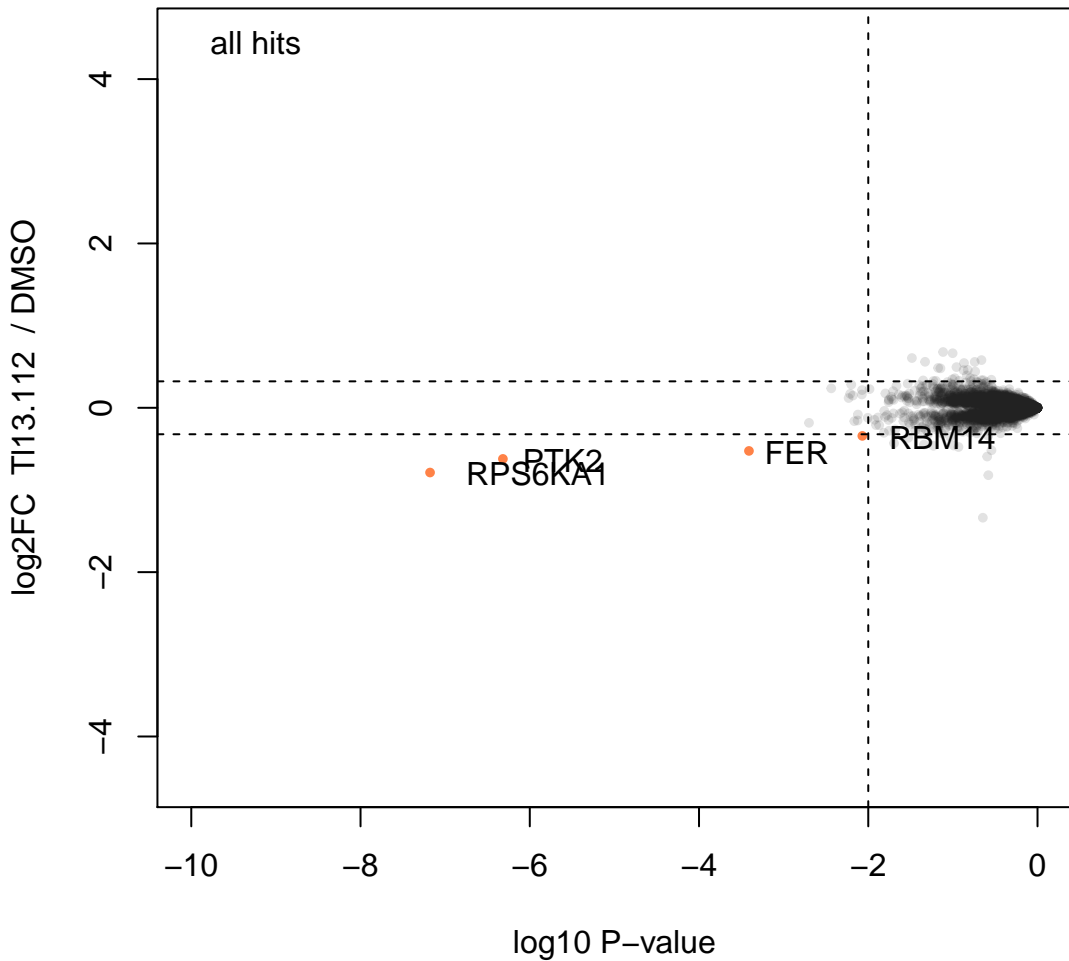

TI13.112 (wp012)

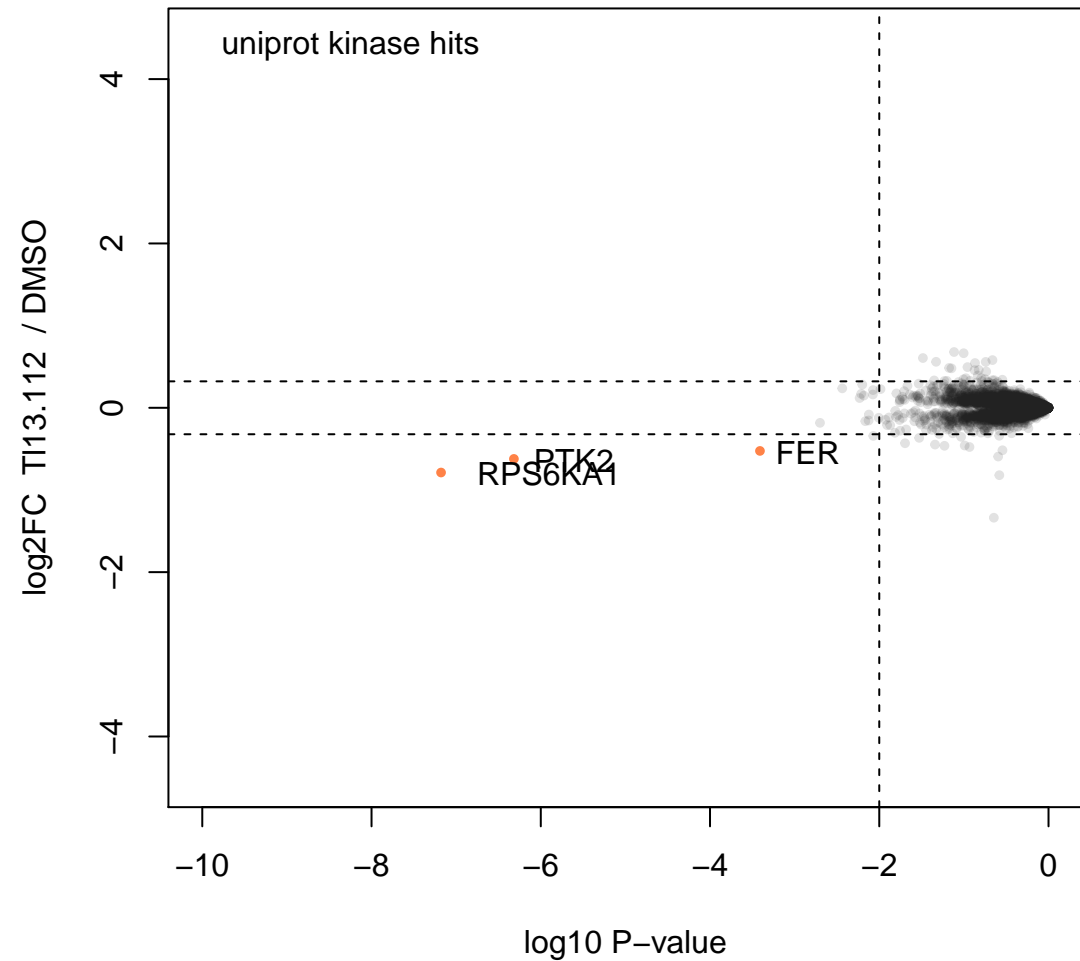

TL13.97 (wp014)

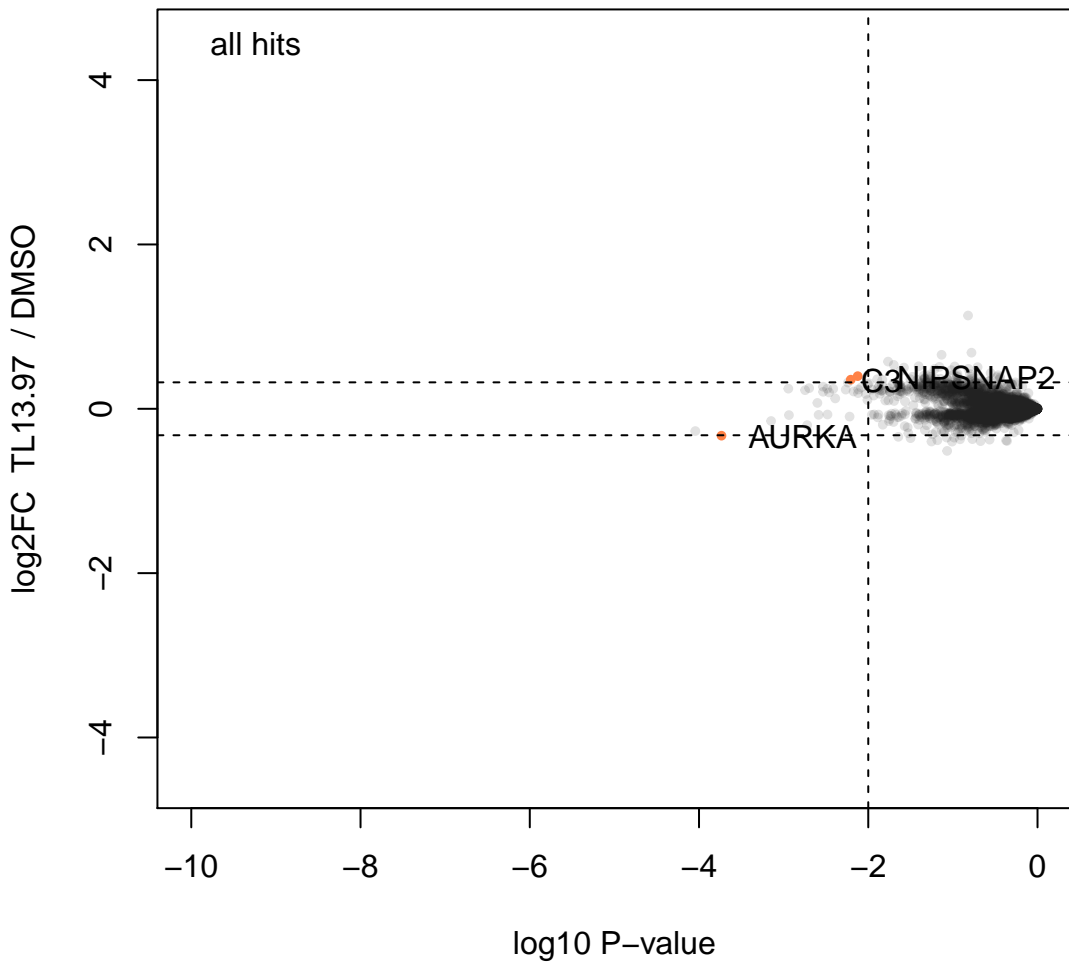

TL13.97 (wp014)

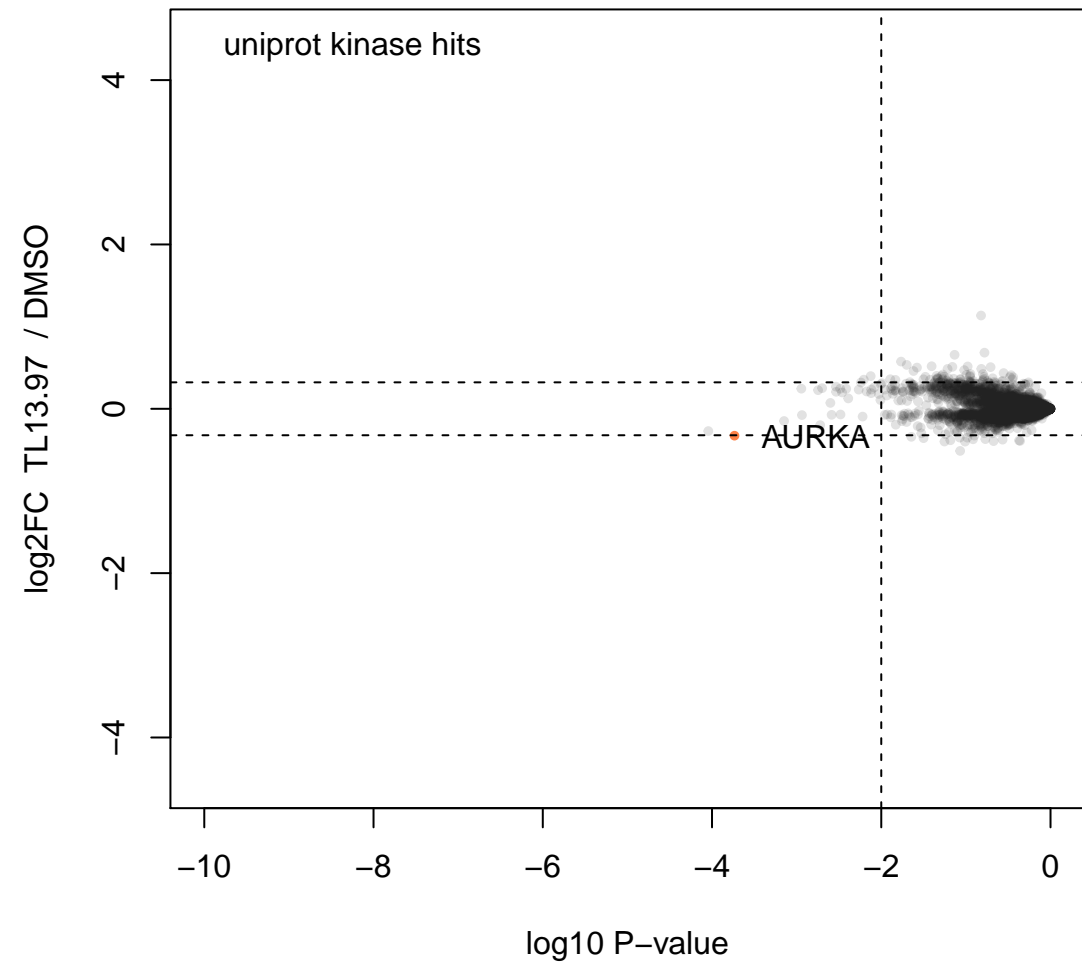

SK.3.91\_1uM (wp016)

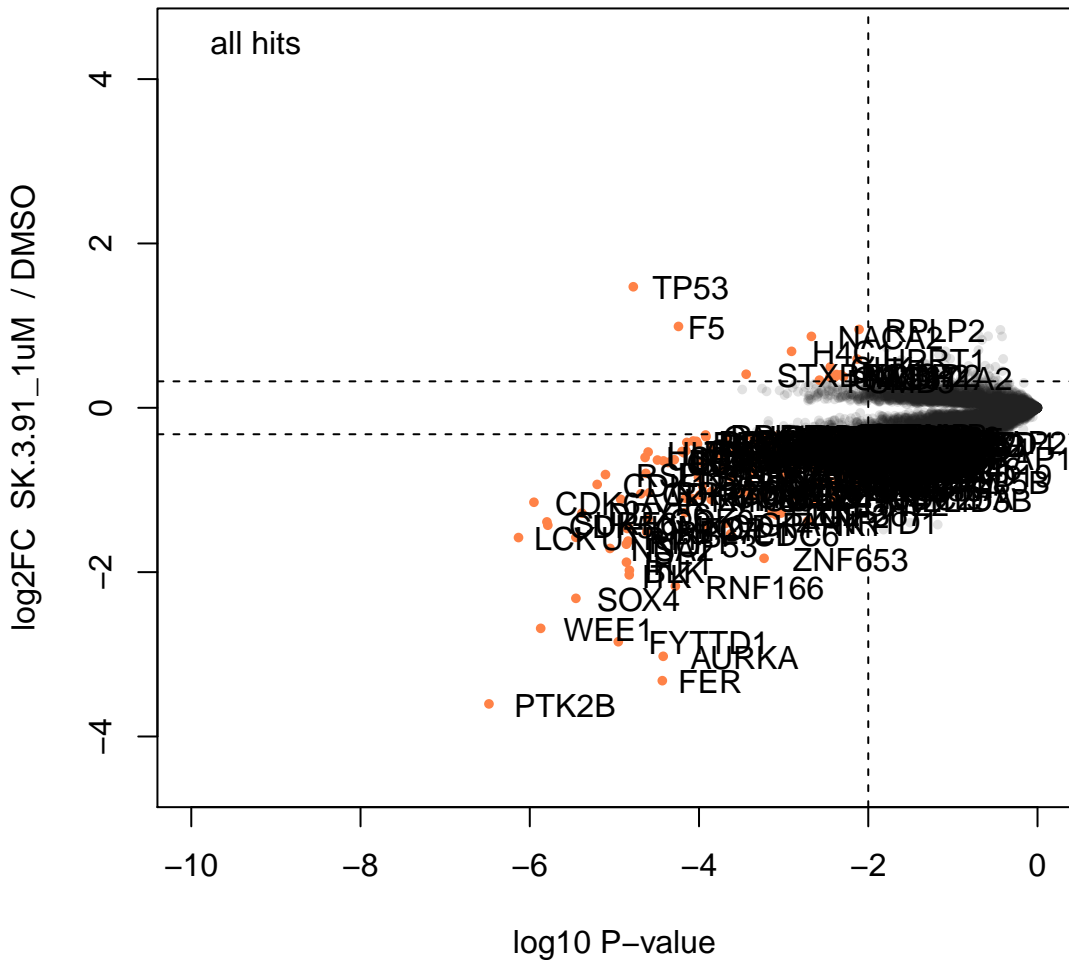

SK.3.91\_1uM (wp016)

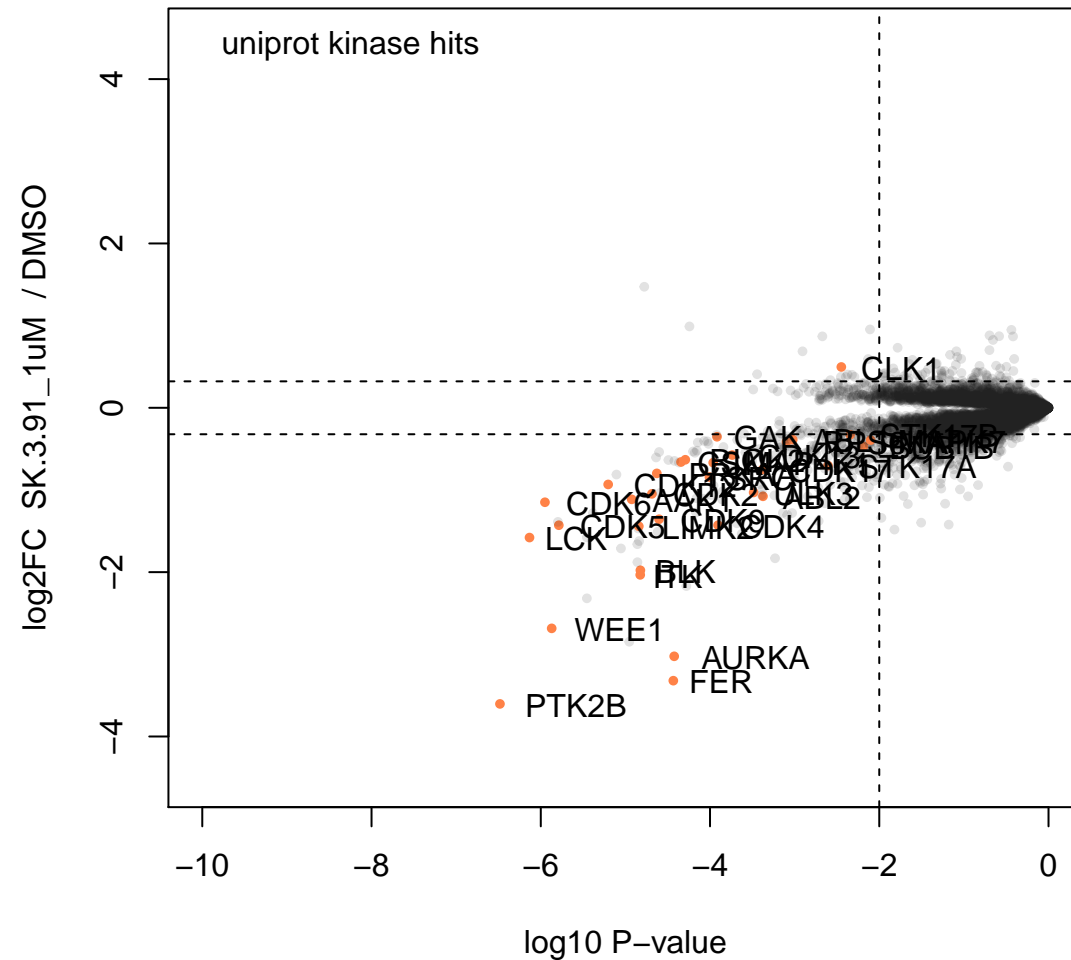

TL12.186 (wp016)

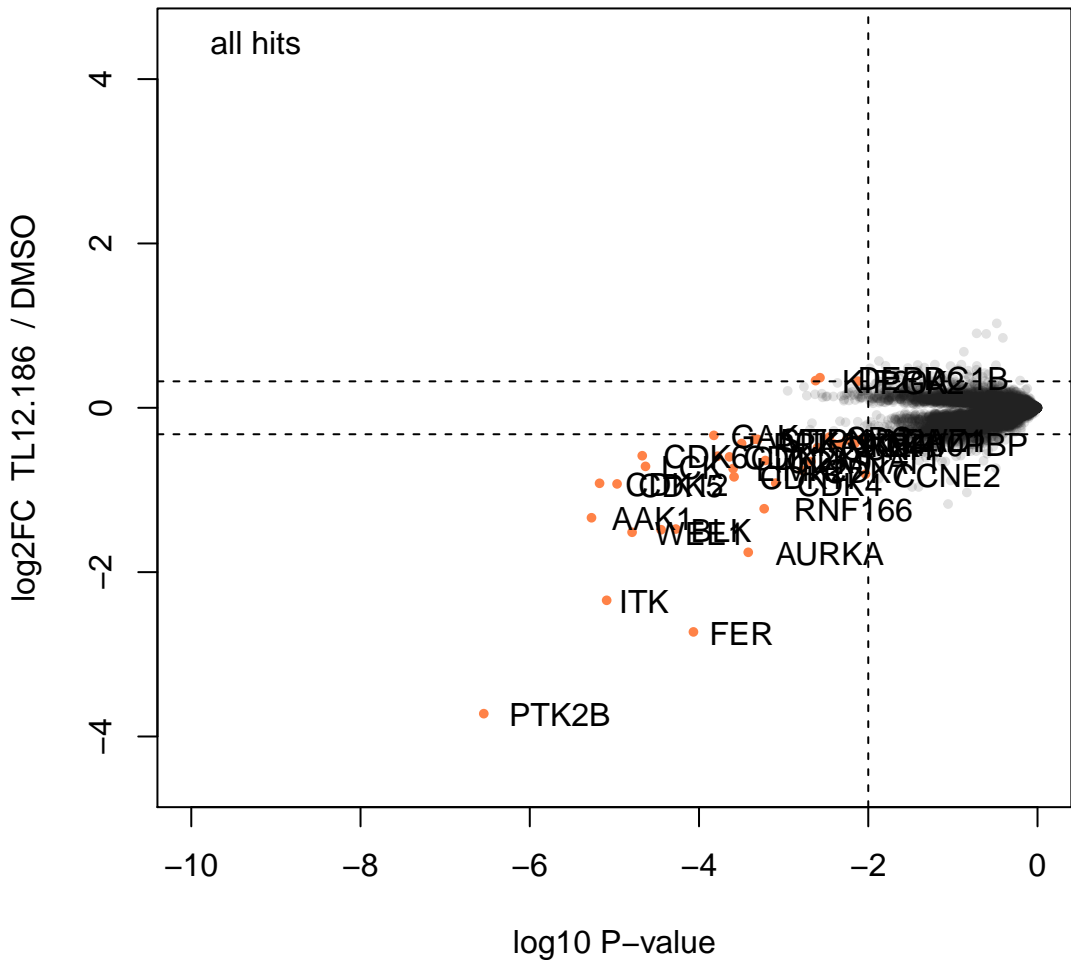

TL12.186 (wp016)

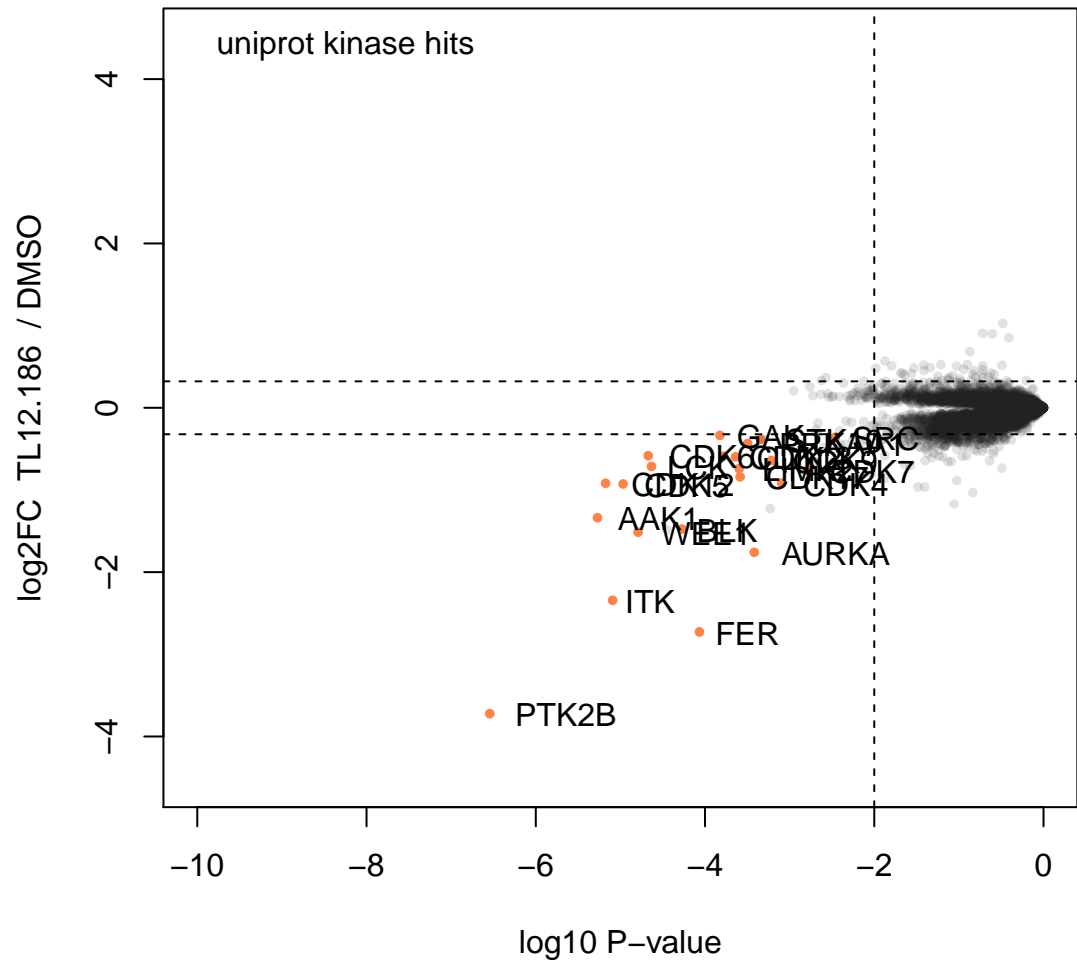



SK.3.93 (wp016)

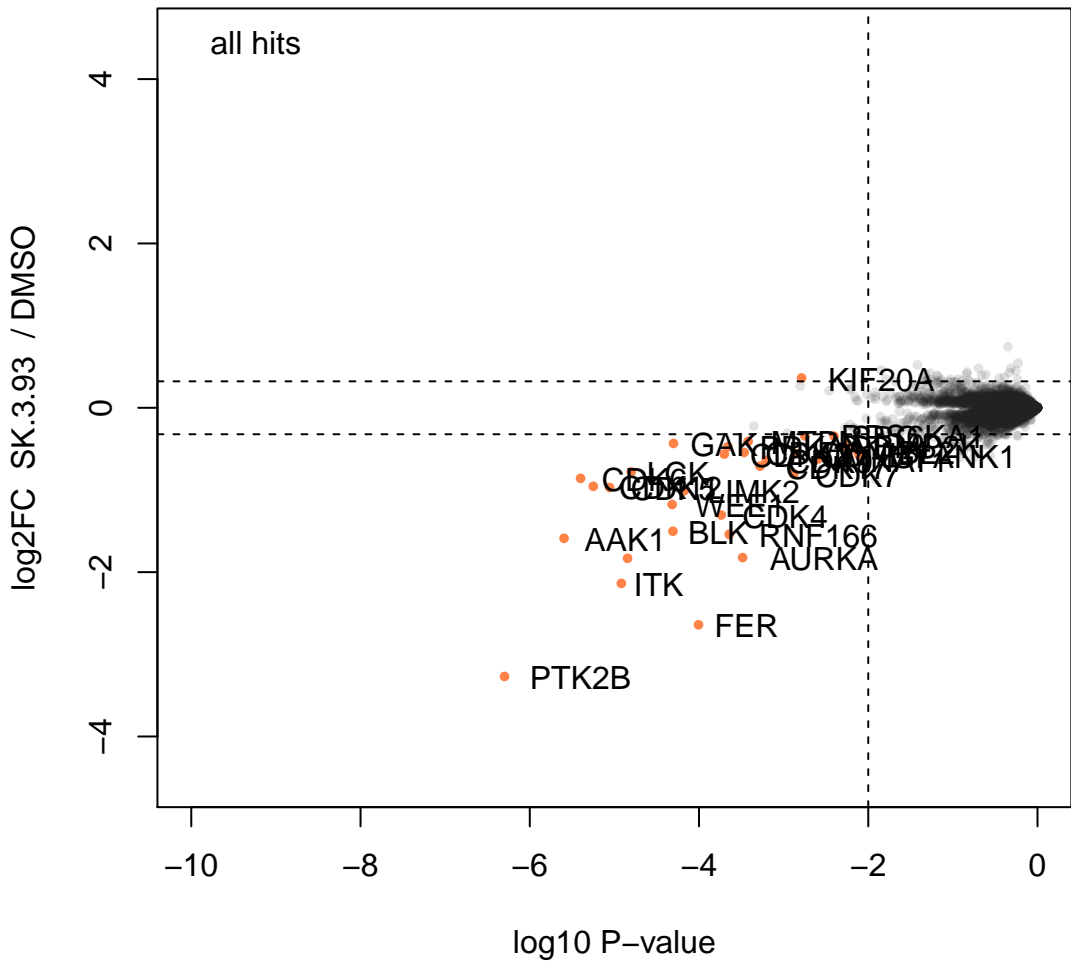

SK.3.93 (wp016)

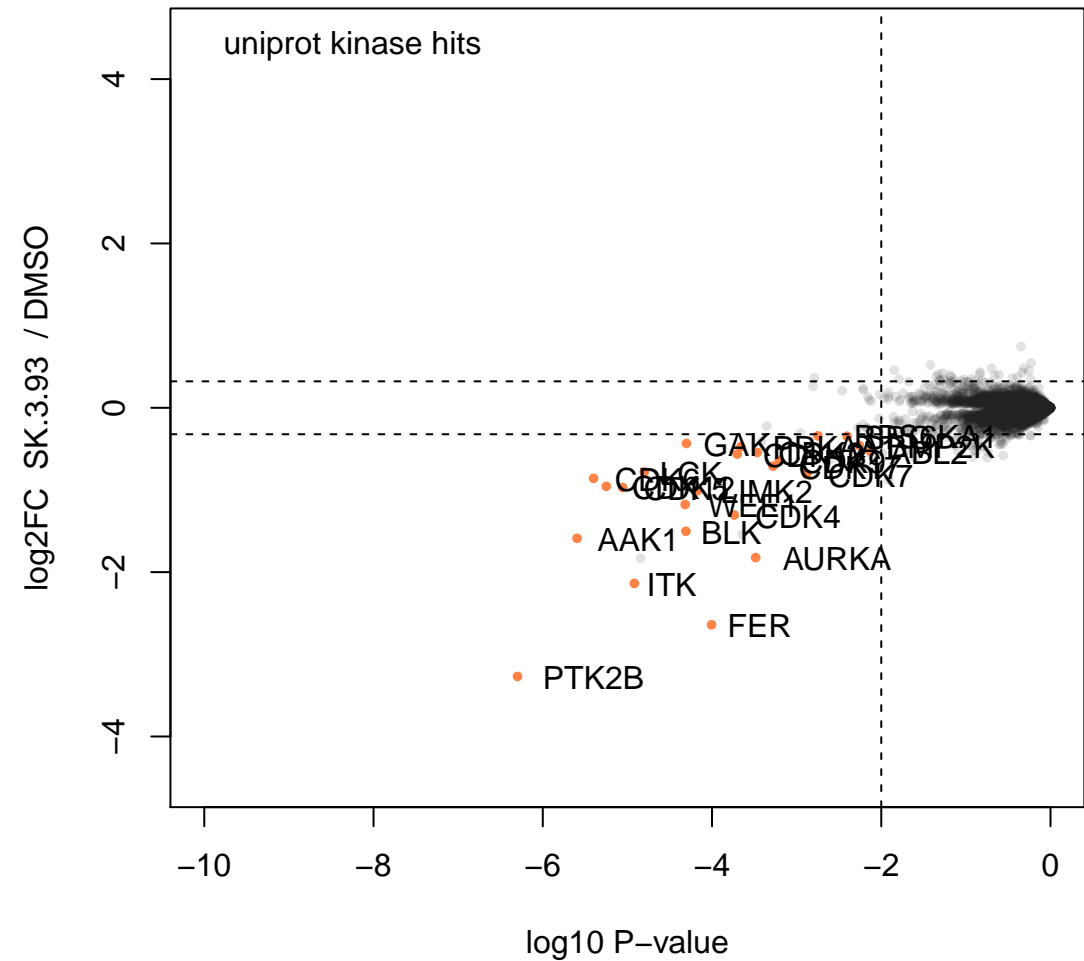

SK.3.91 (wp016)

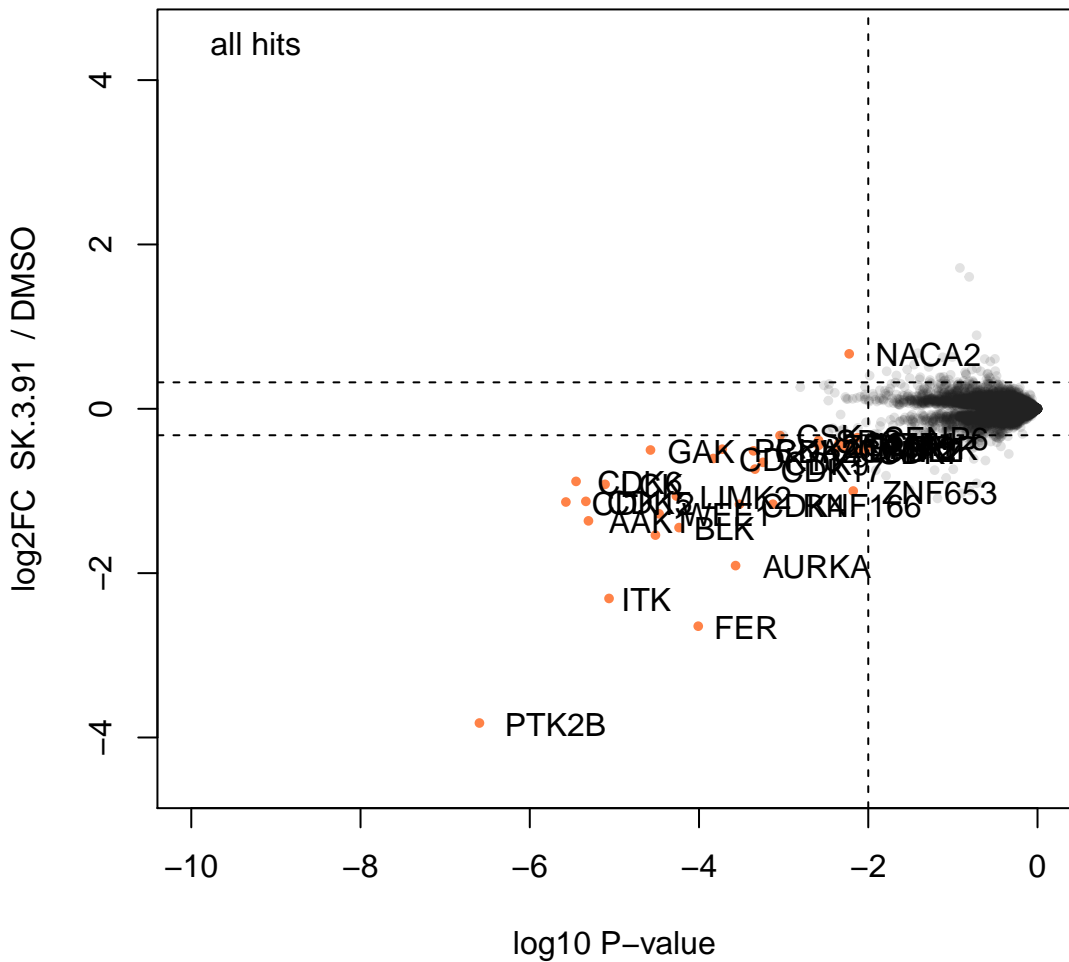

SK.3.91 (wp016)

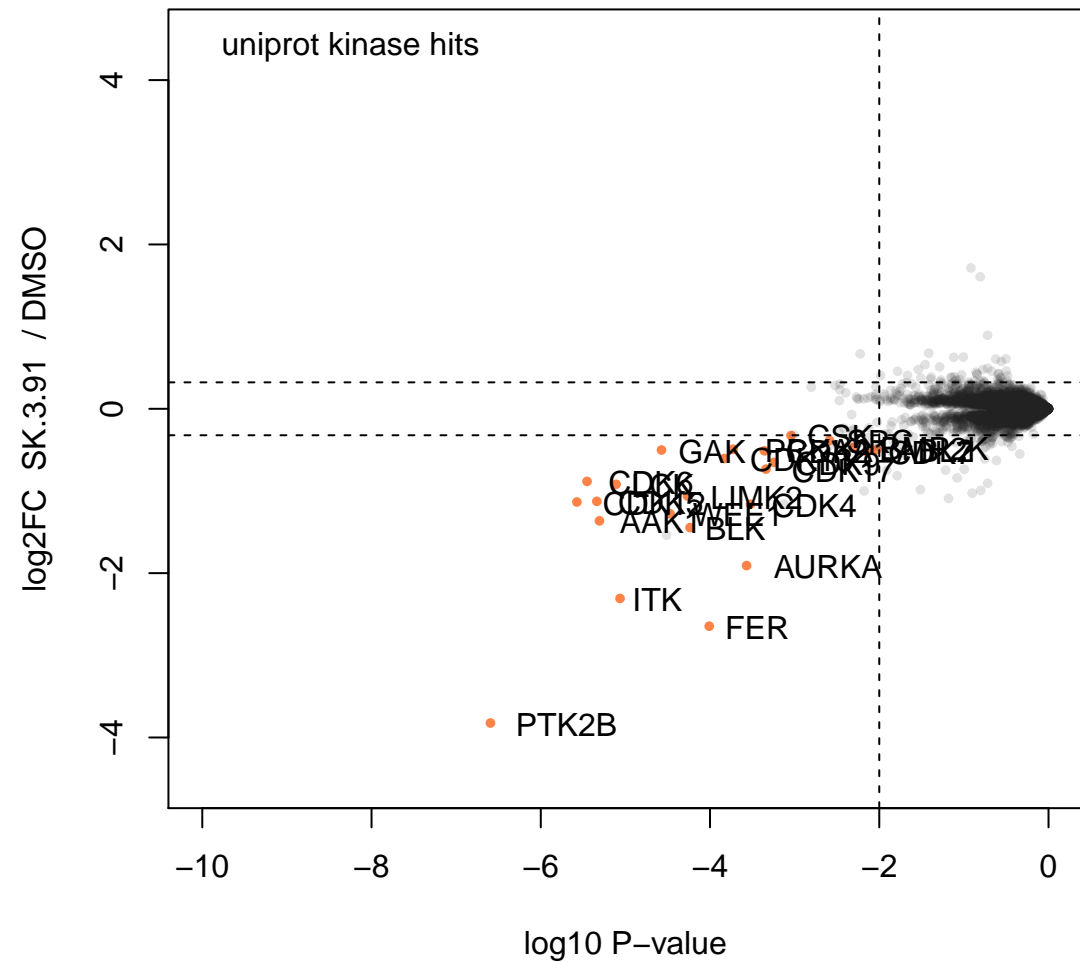

SK.3.87 (wp016)

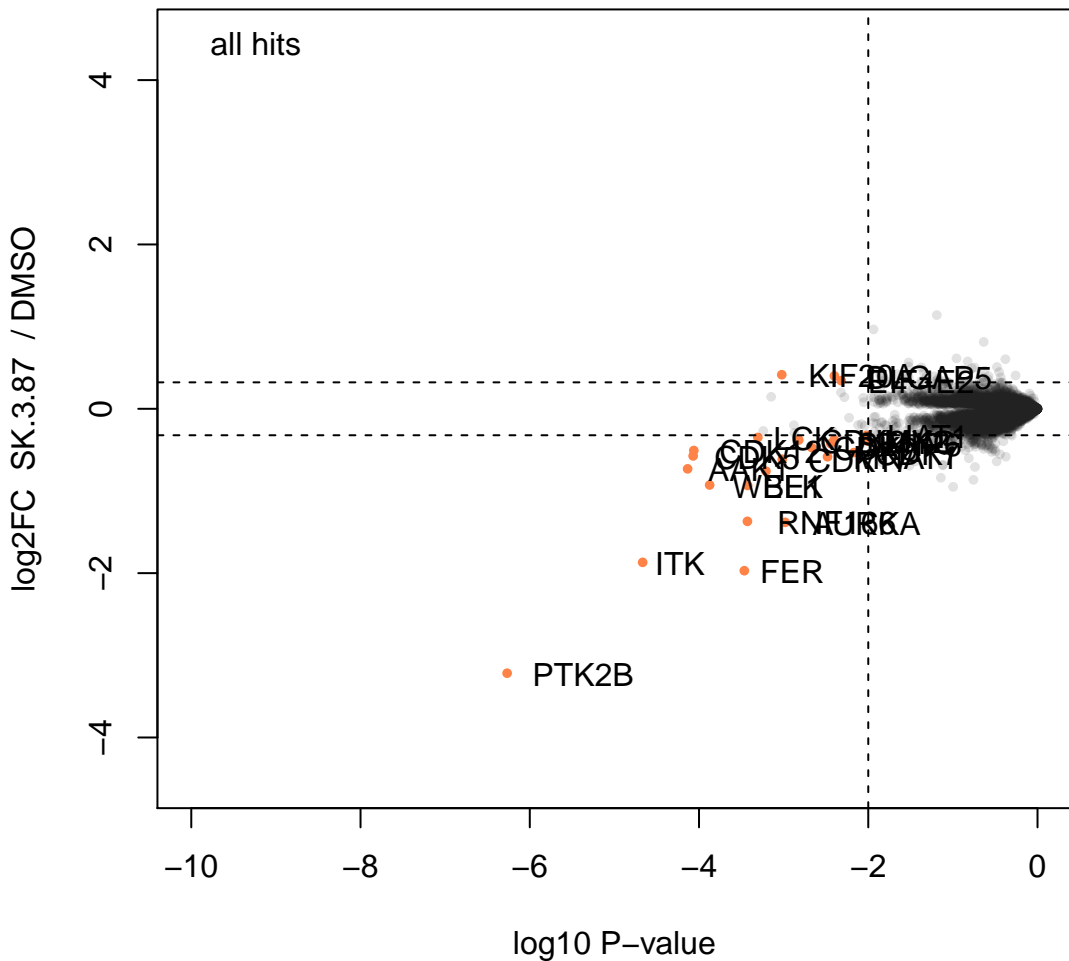

SK.3.87 (wp016)

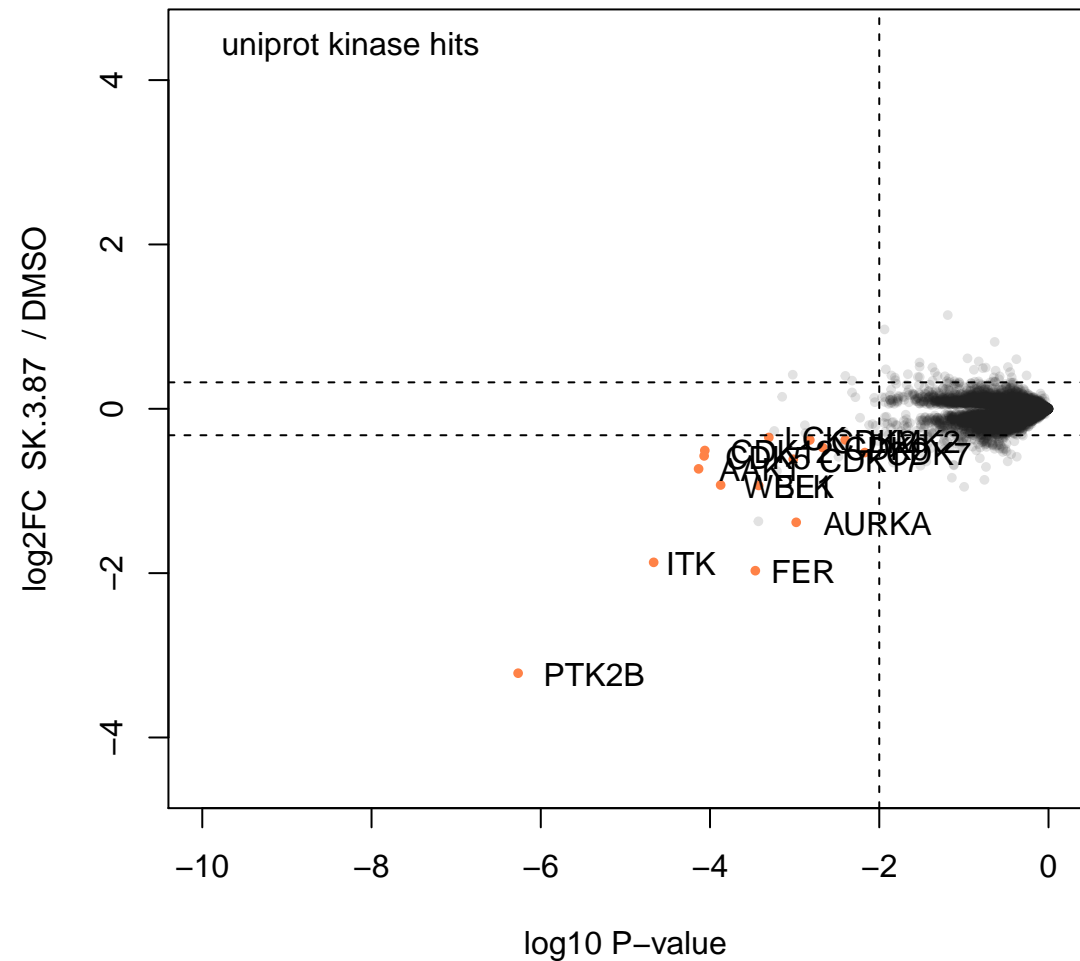

LT2.49 (wp016)

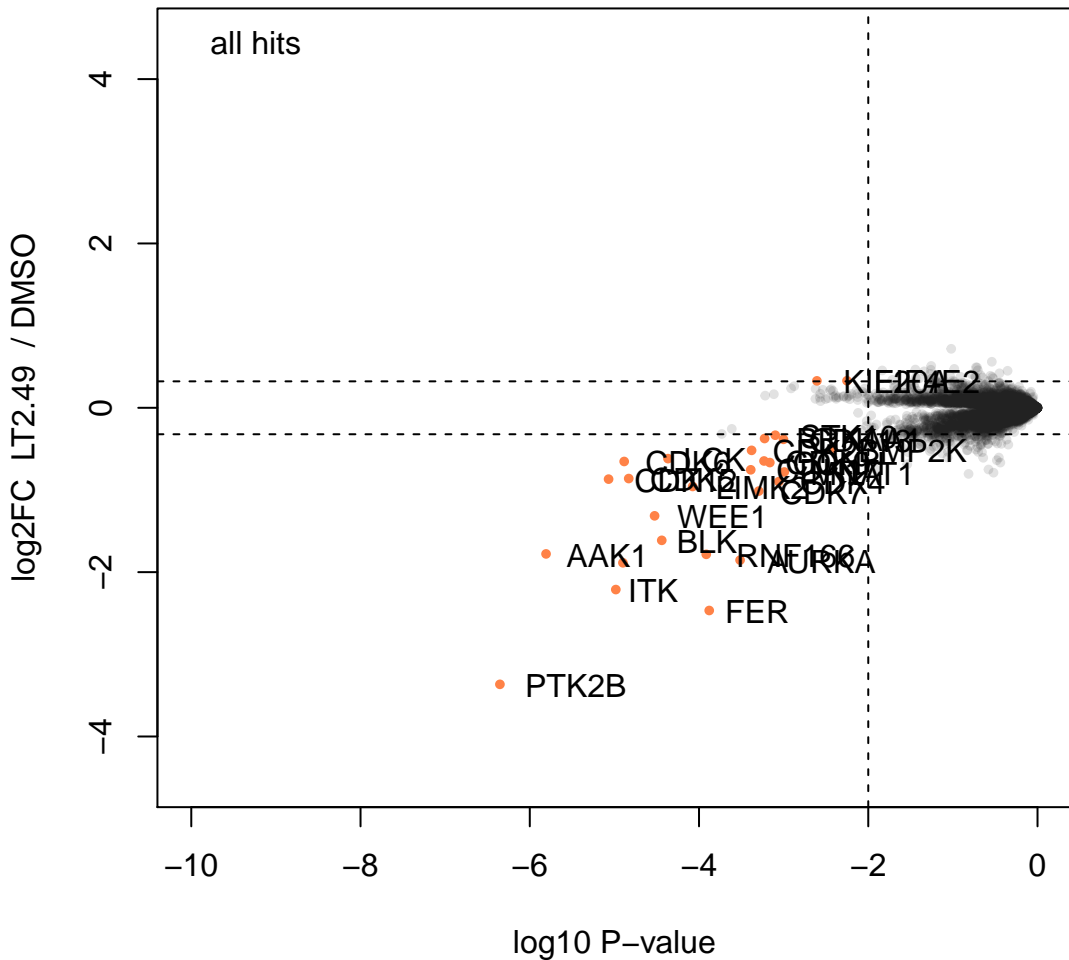

LT2.49 (wp016)

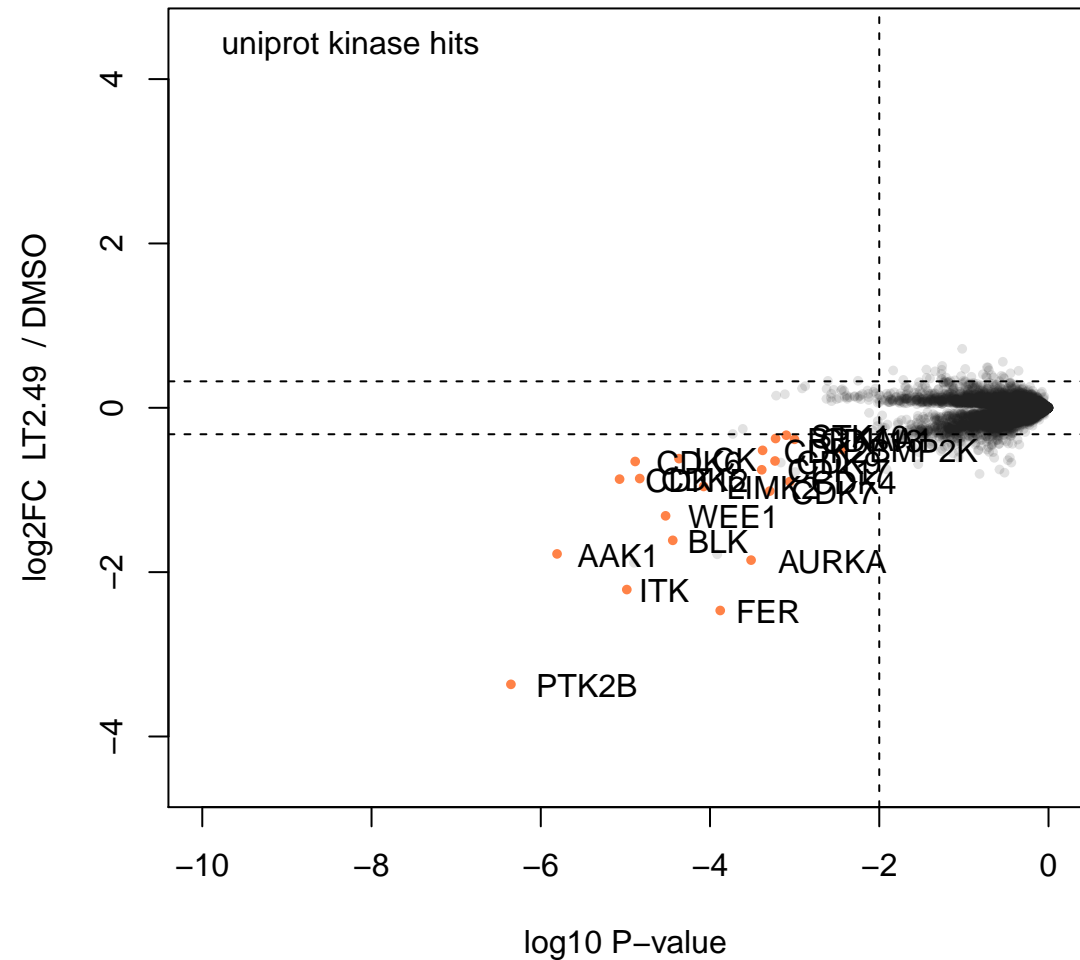

### SK.3.89 (wp016)

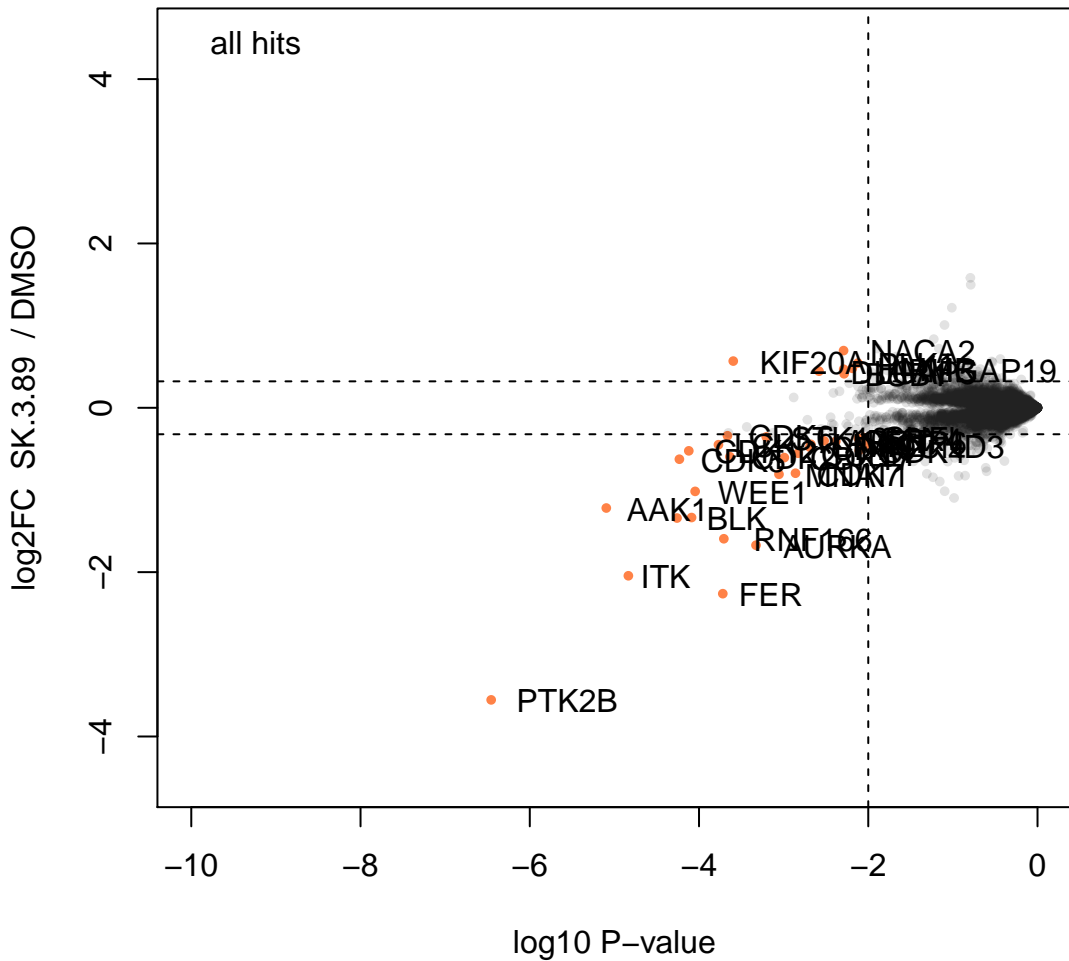

### SK.3.89 (wp016)

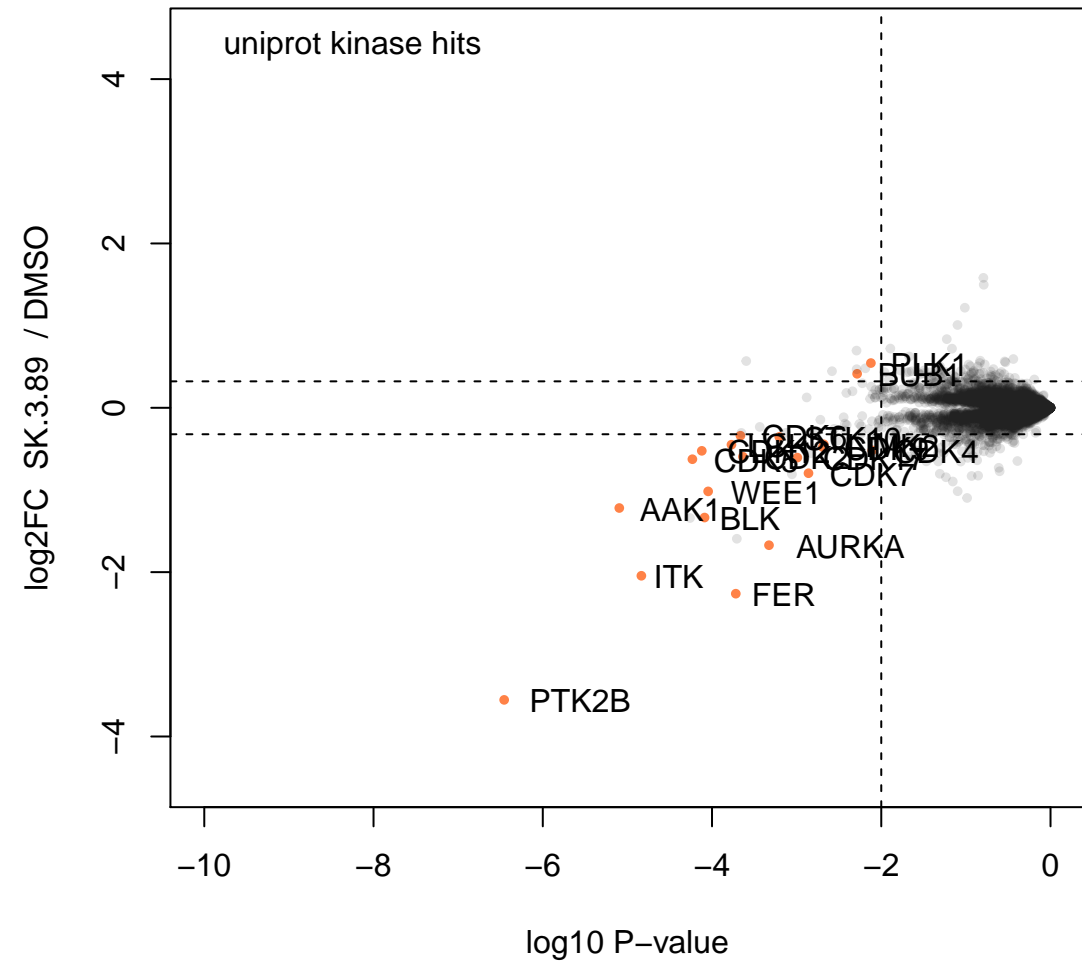

WH.9533.153 (wp017)

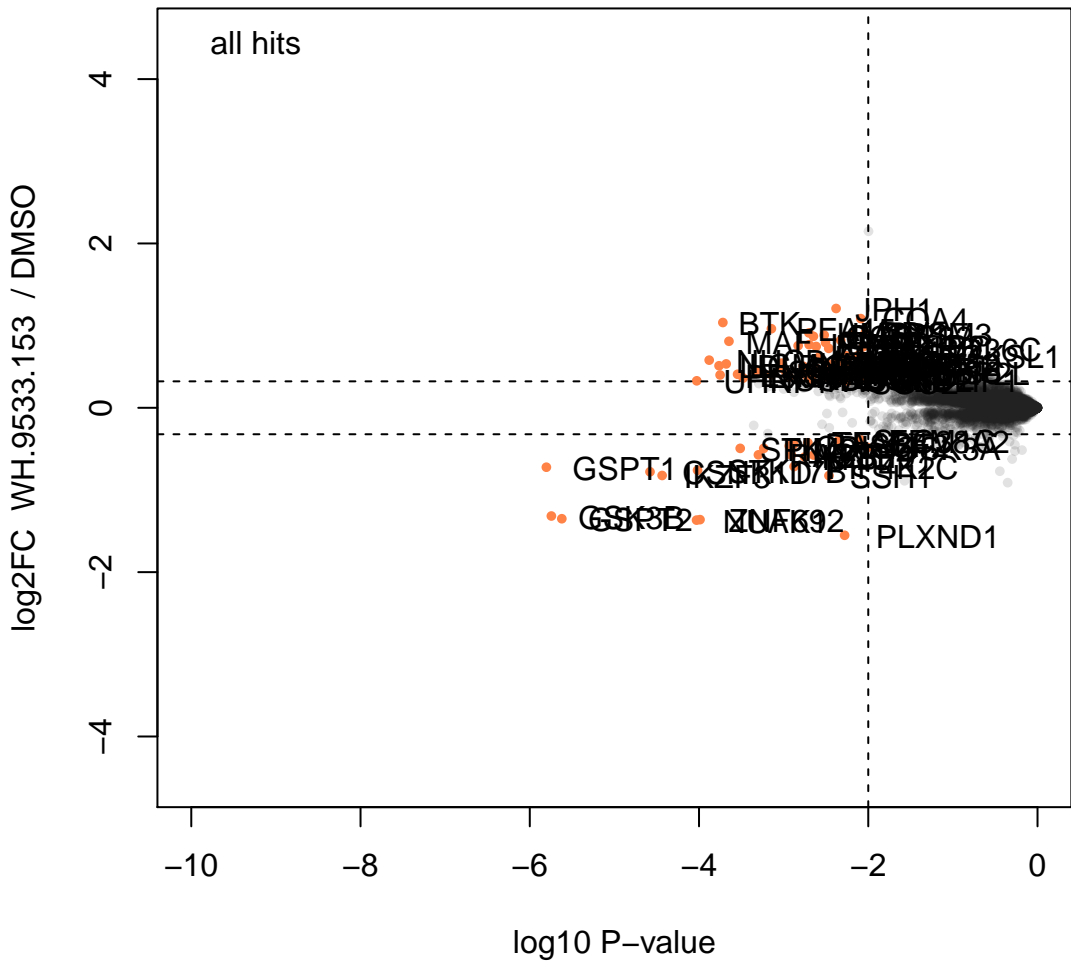

WH.9533.153 (wp017)

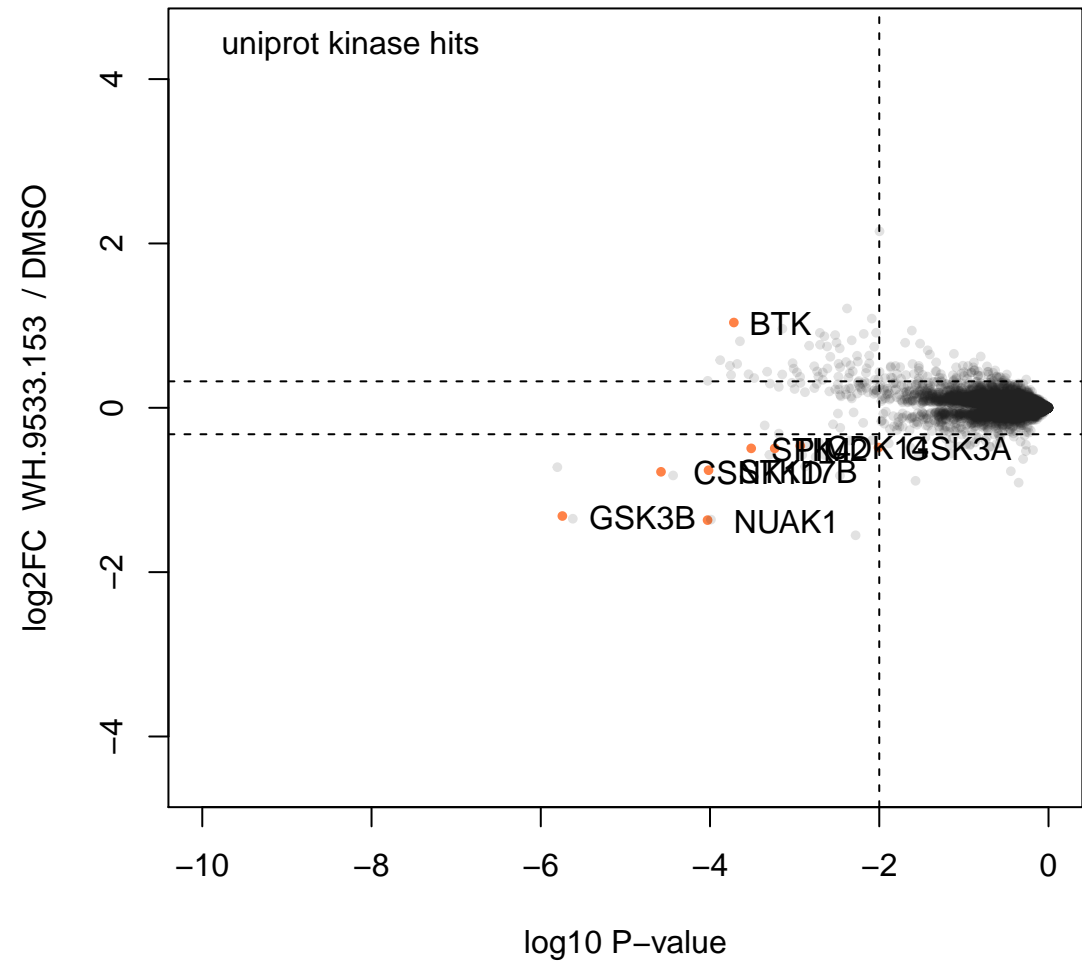

DB0646 (wp045)

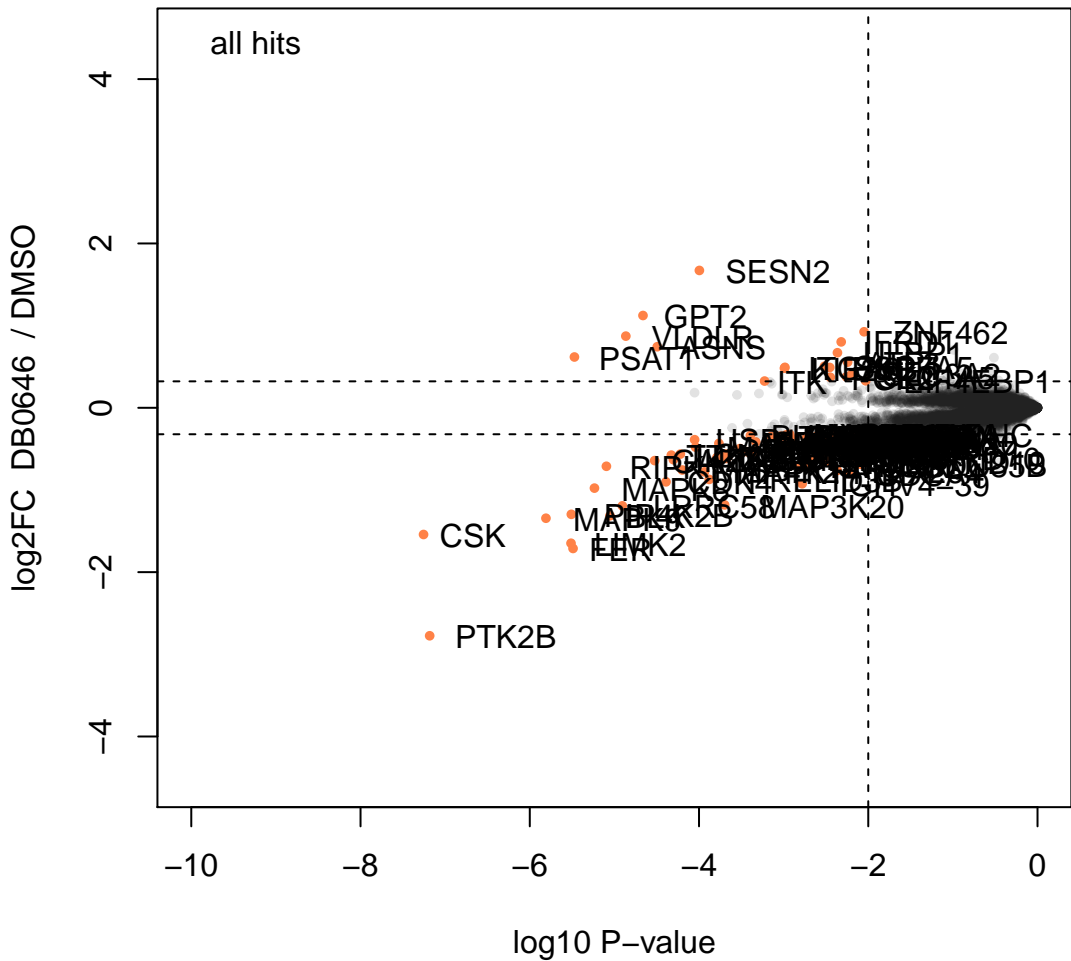

DB0646 (wp045)

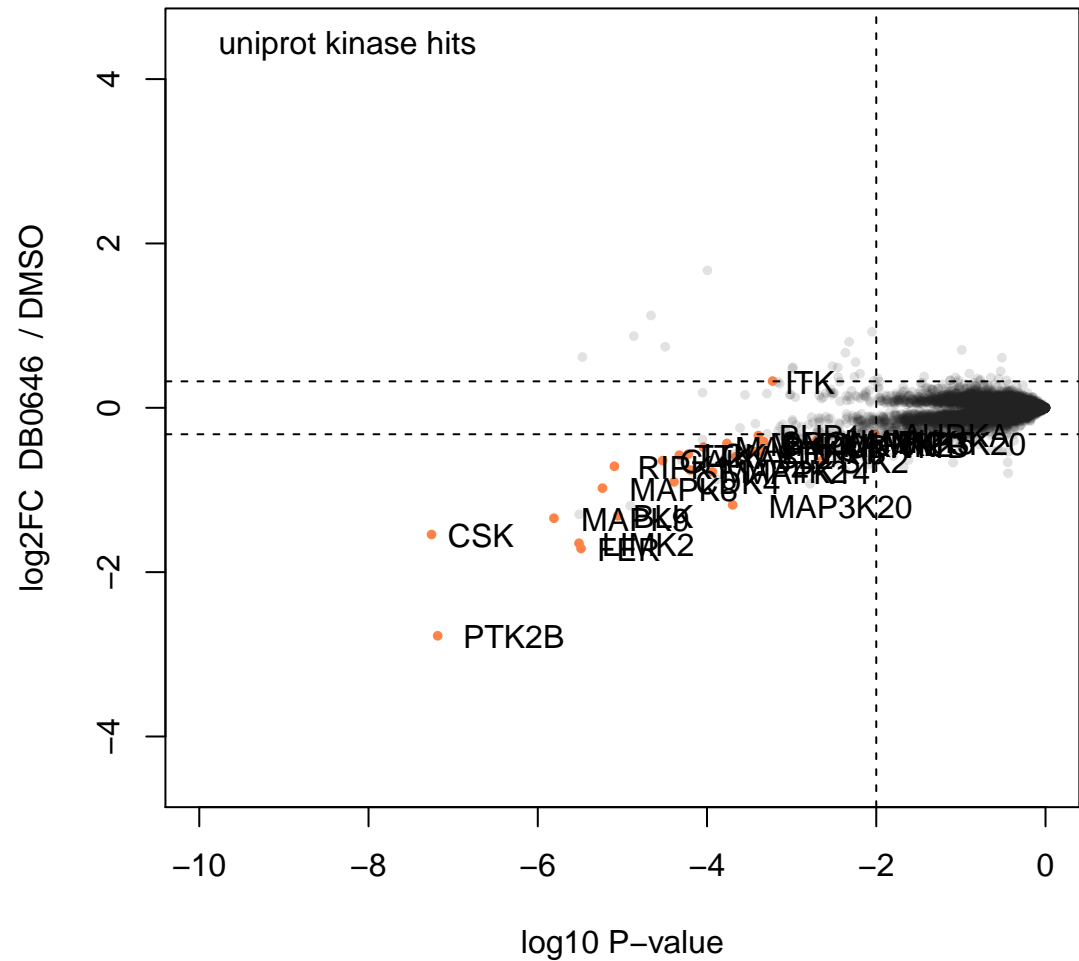

DB.3.291 (wp045)

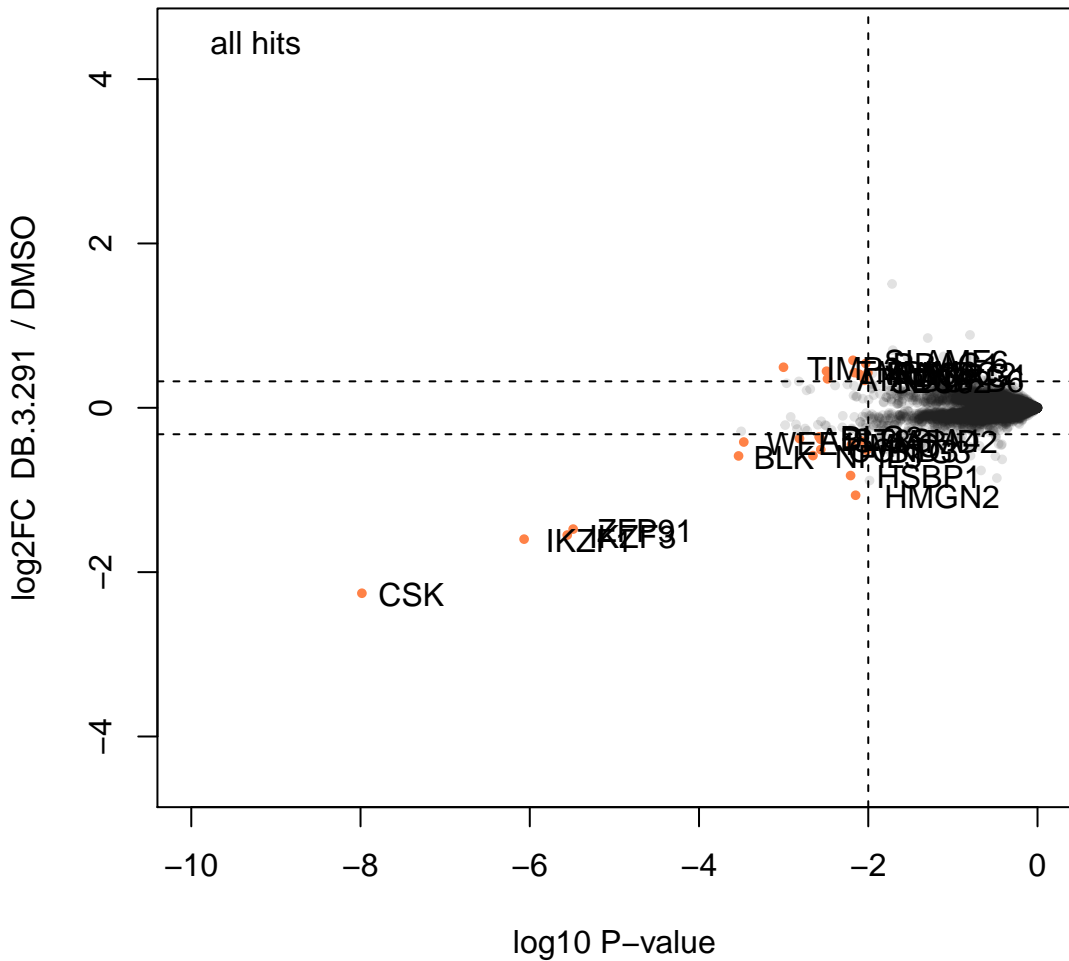

DB.3.291 (wp045)

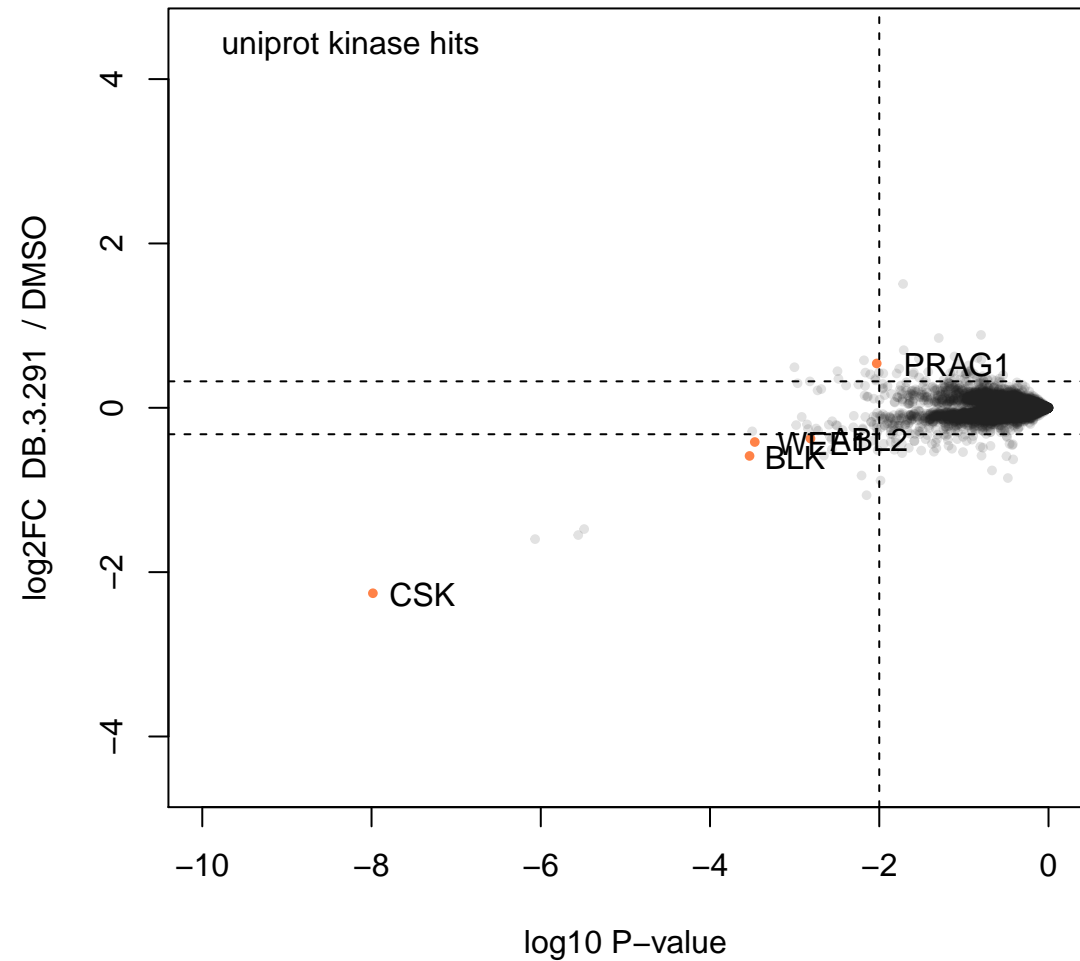



DB0663 (wp045)

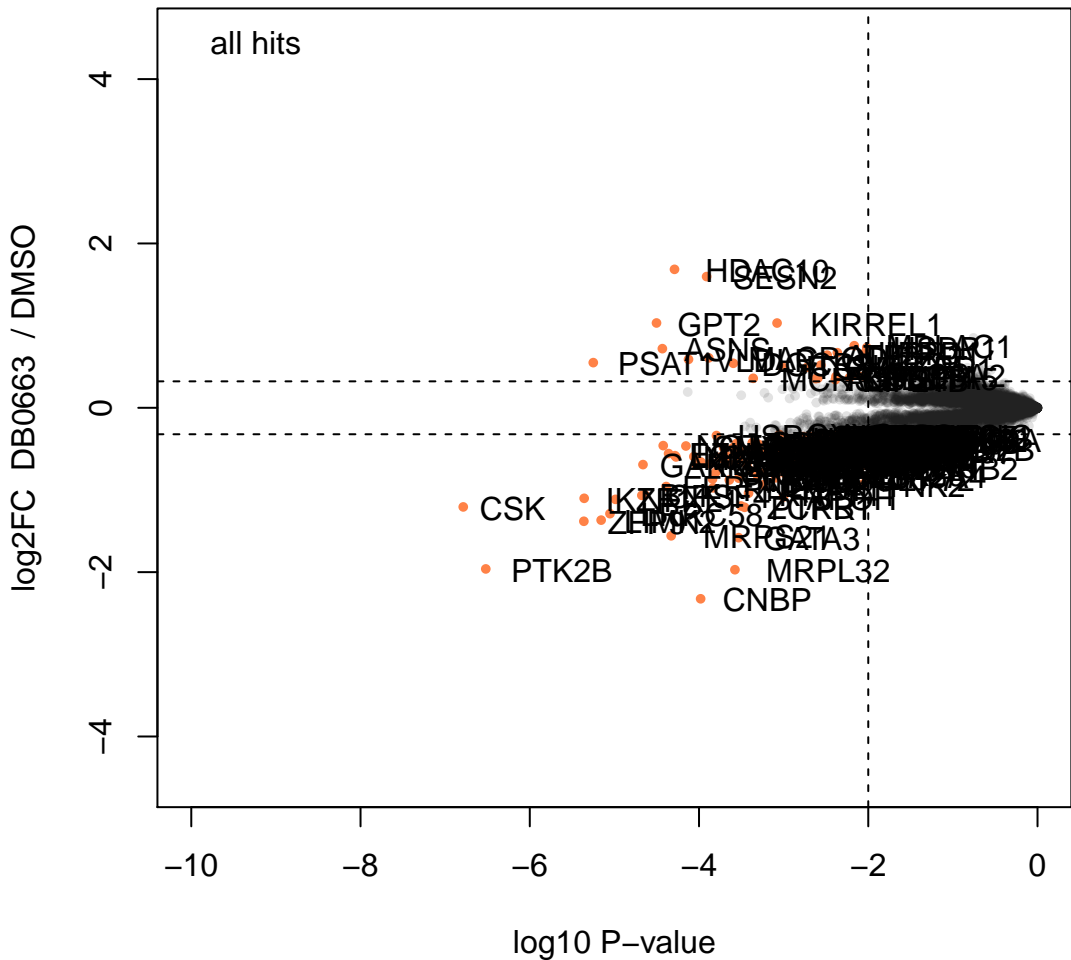

DB0663 (wp045)

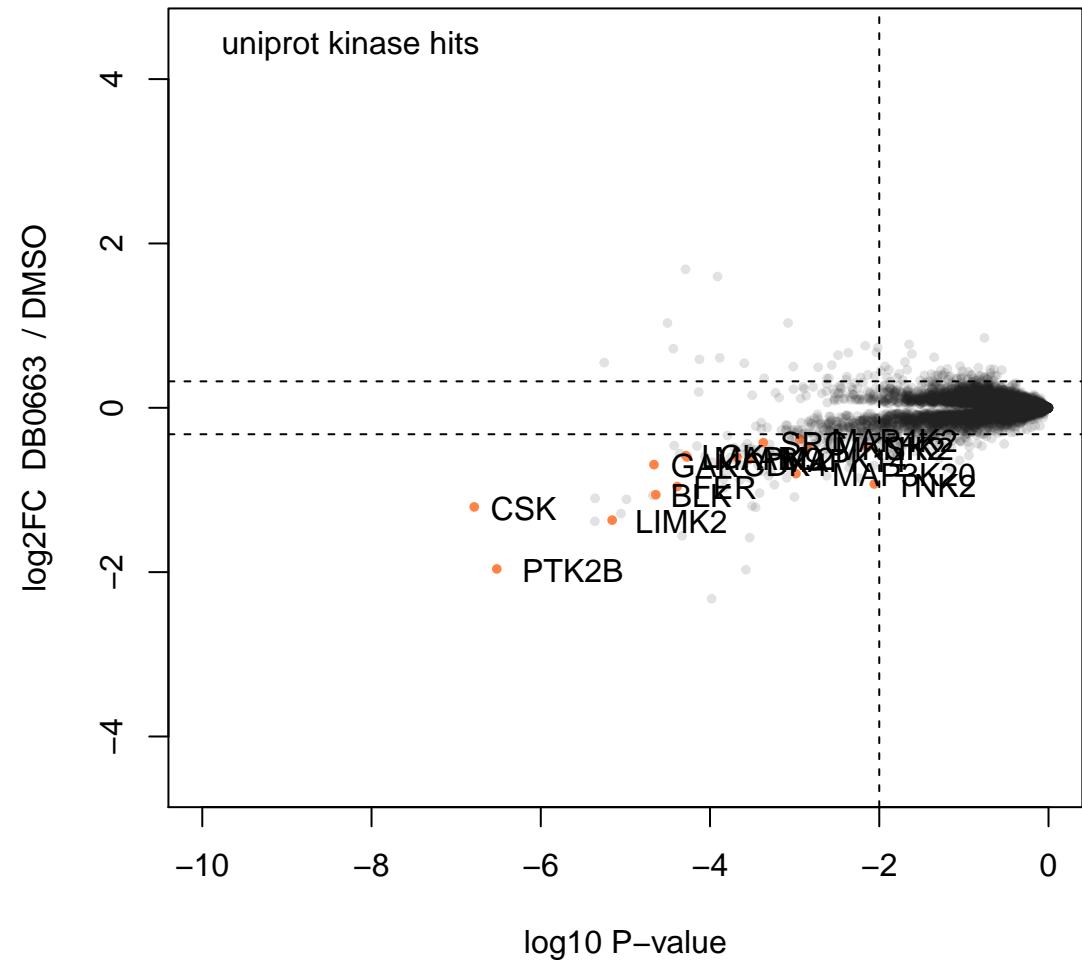

RS0628 (wp045)

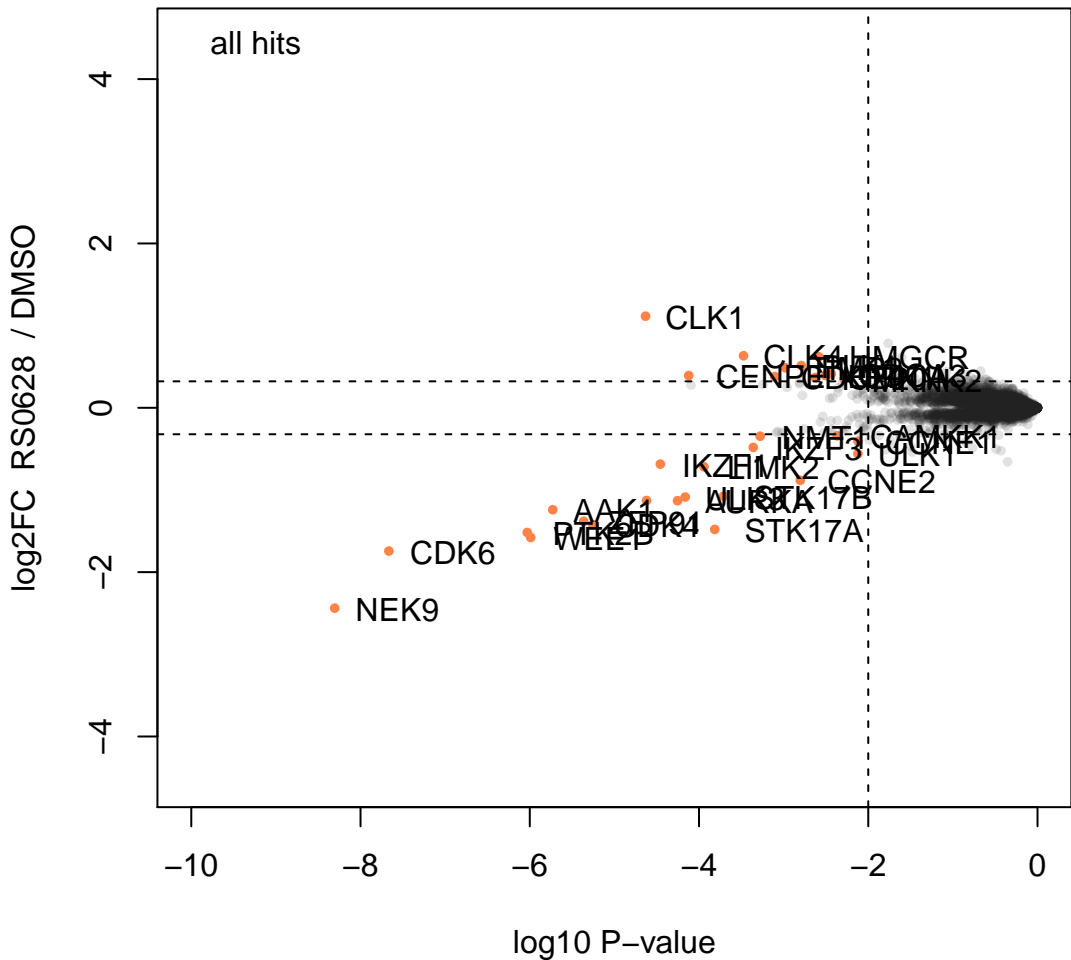

RS0628 (wp045)

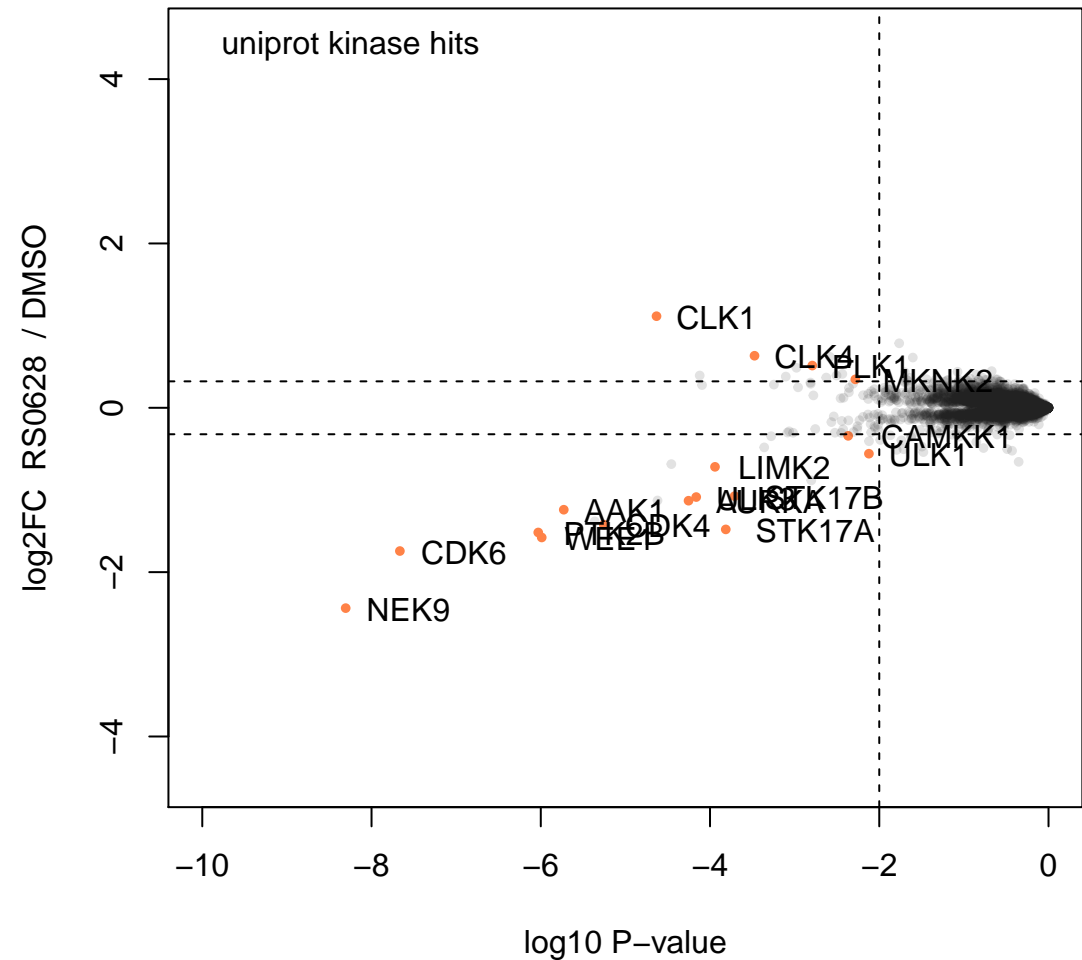

DB0614 (wp045)

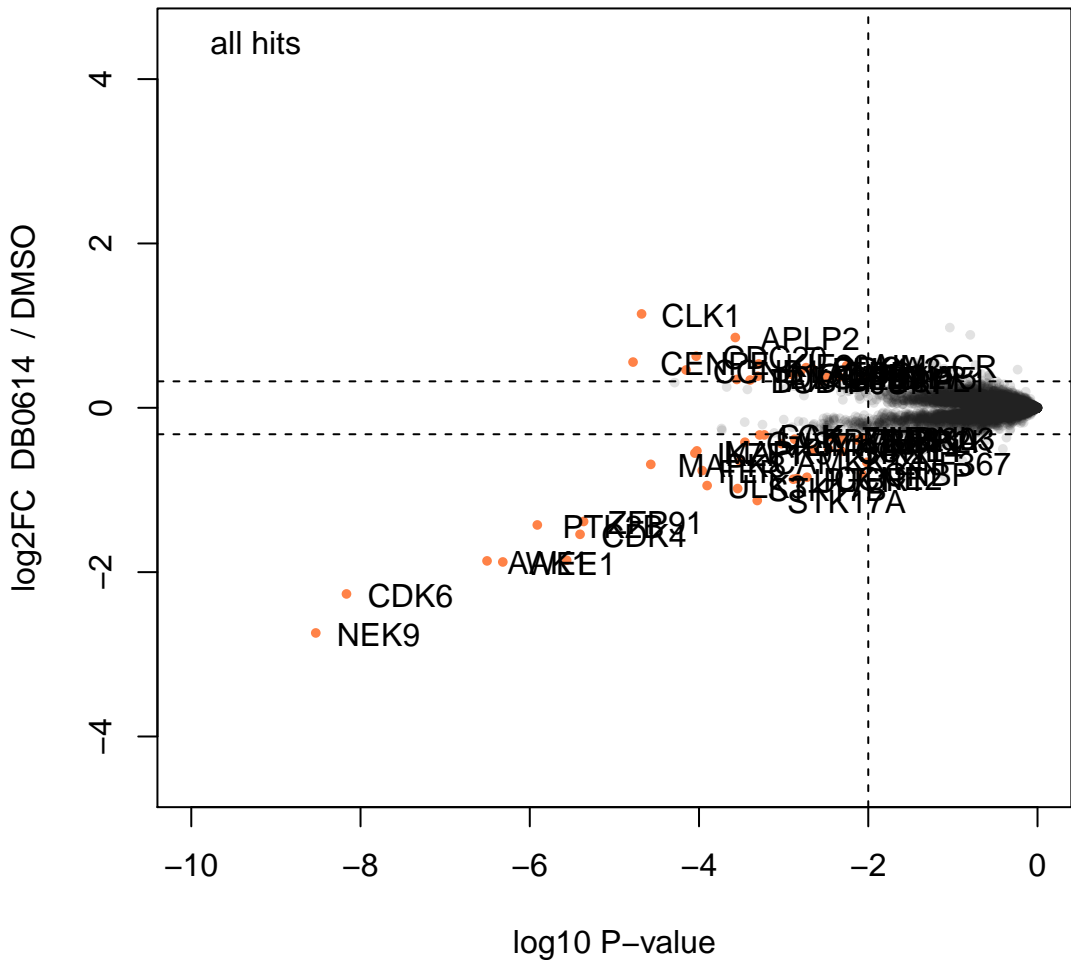

DB0614 (wp045)

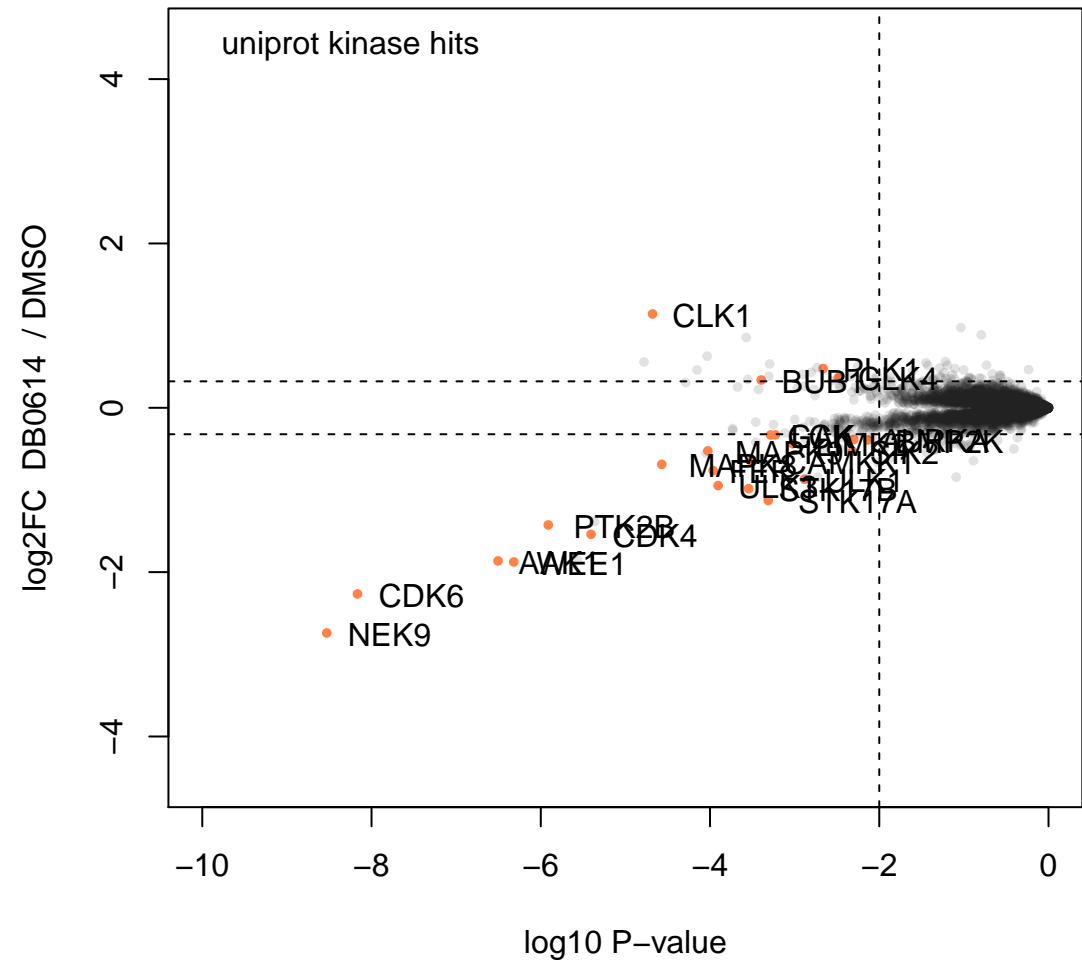

DD.03.106 (wp047)

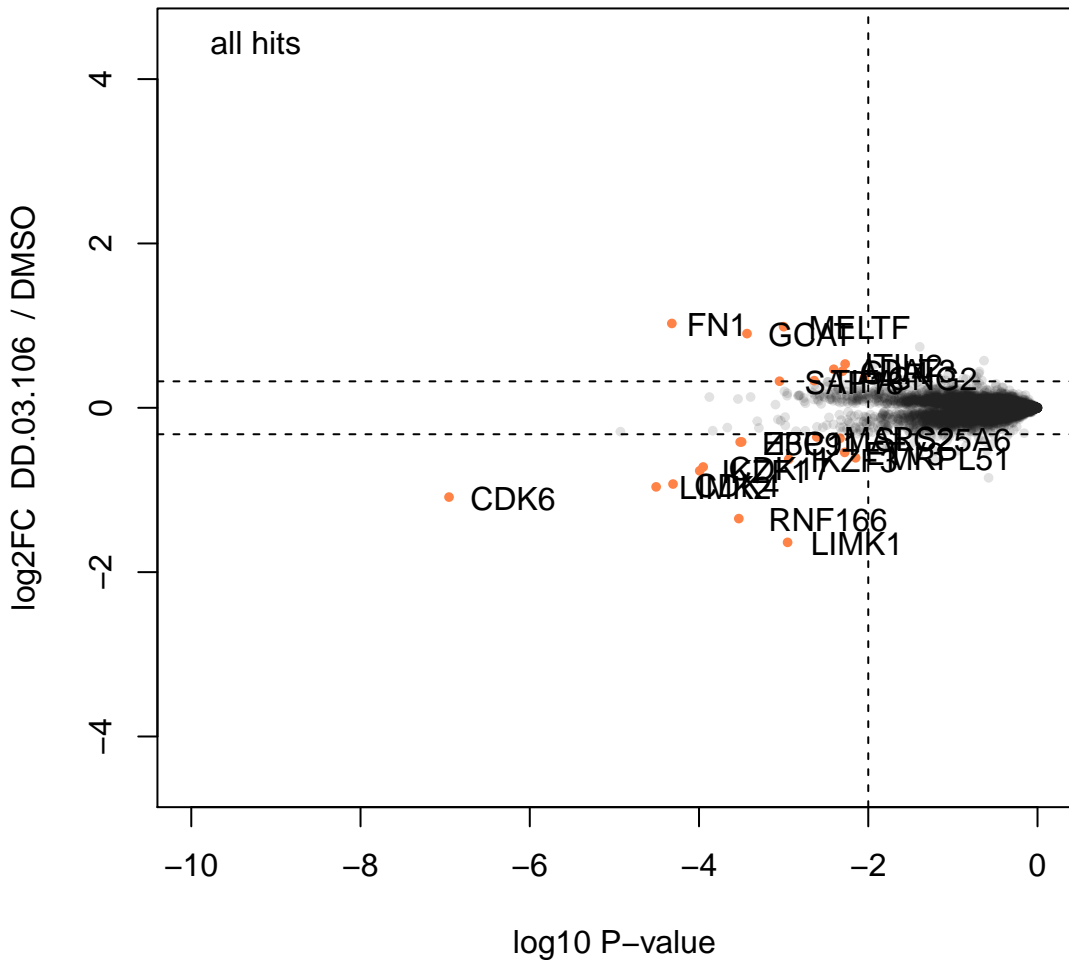

DD.03.106 (wp047)

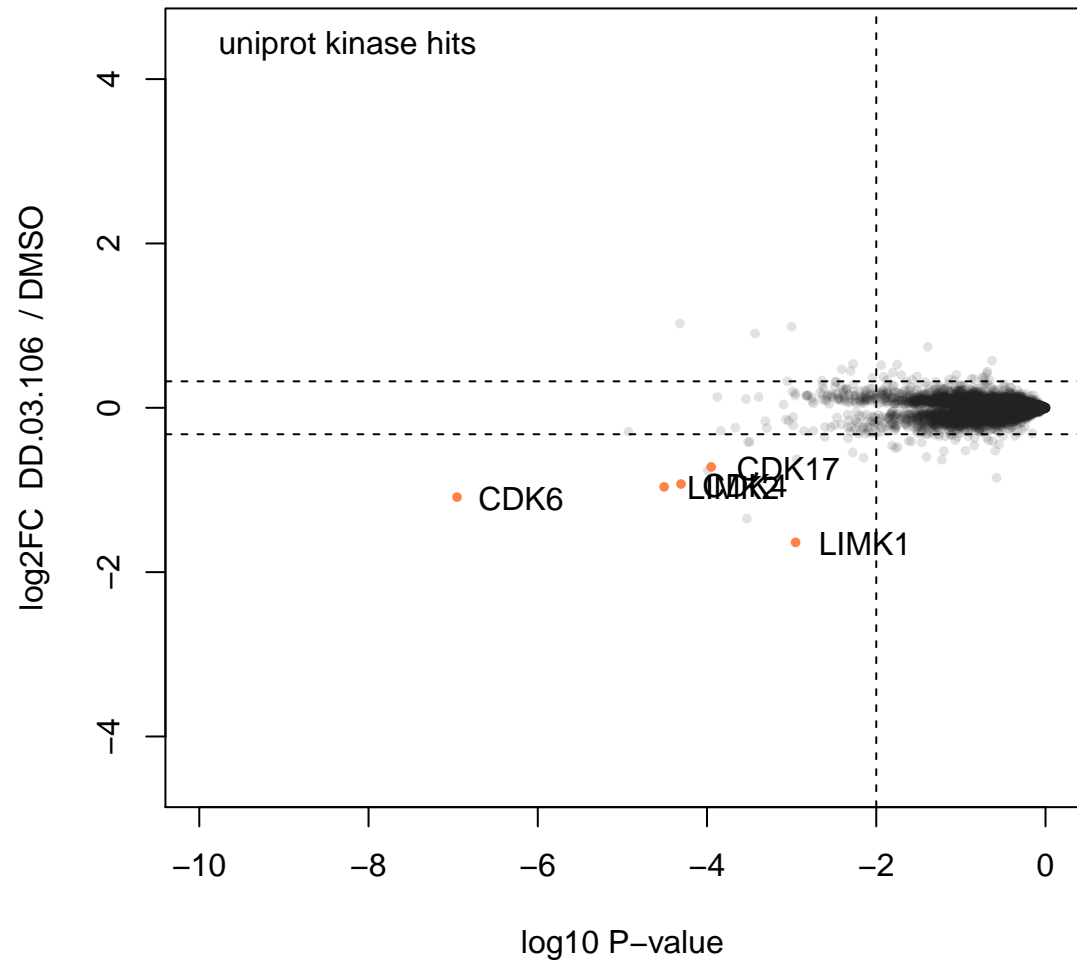

DD.02.198 (wp047)

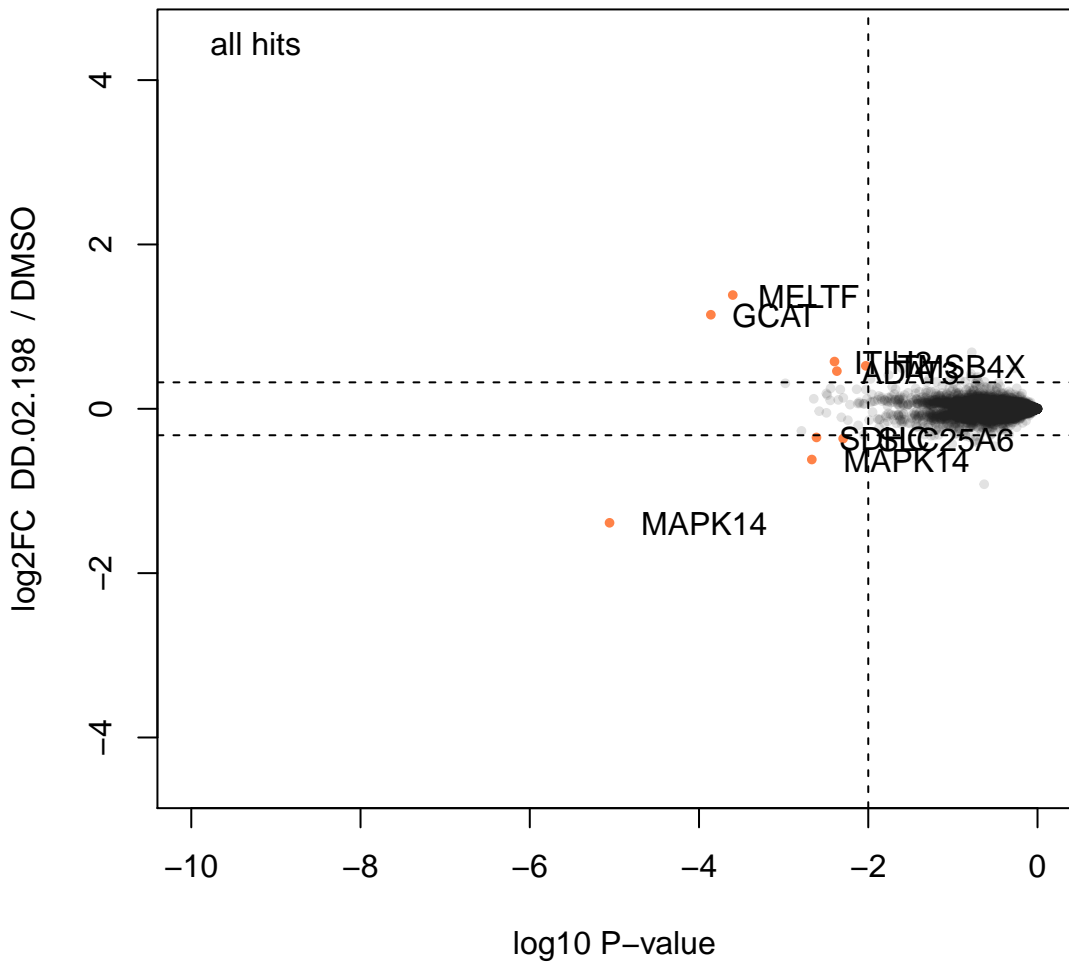

DD.02.198 (wp047)

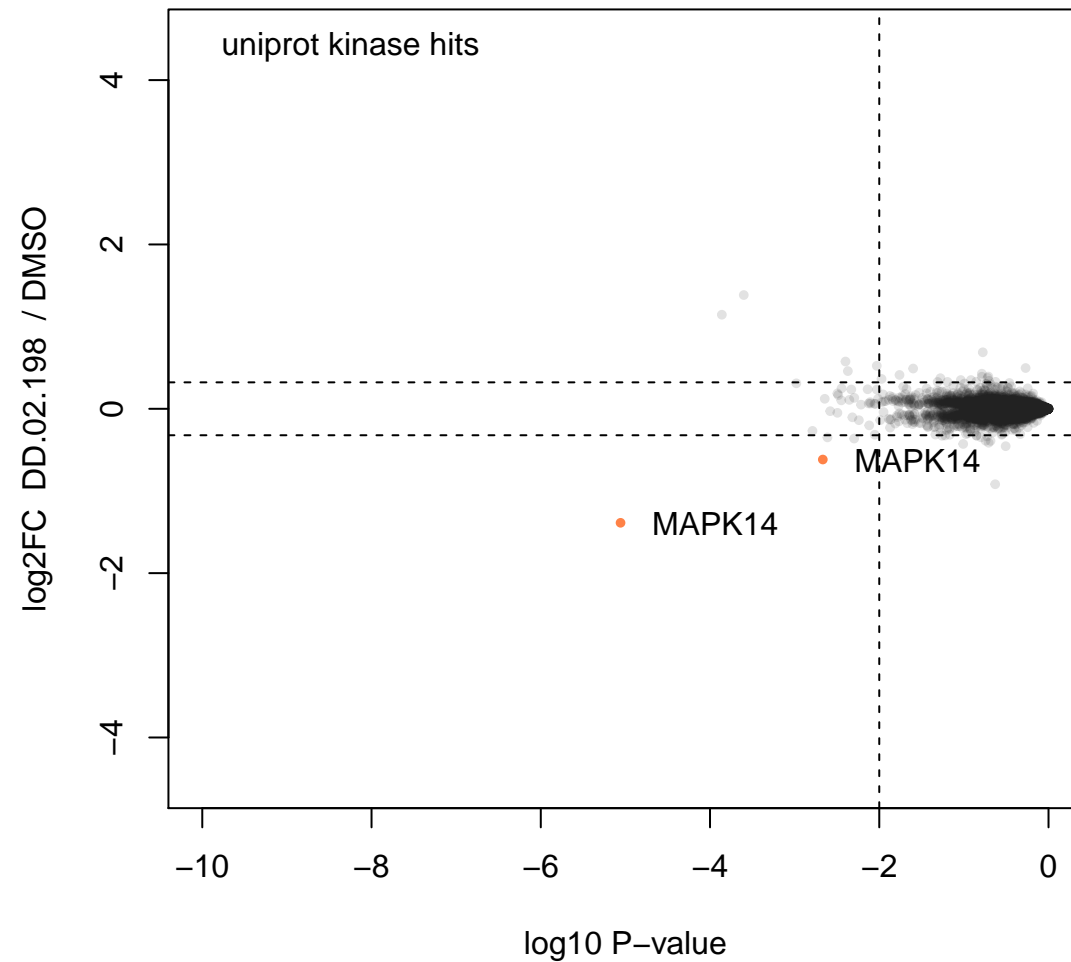

DD.03.119 (wp047)

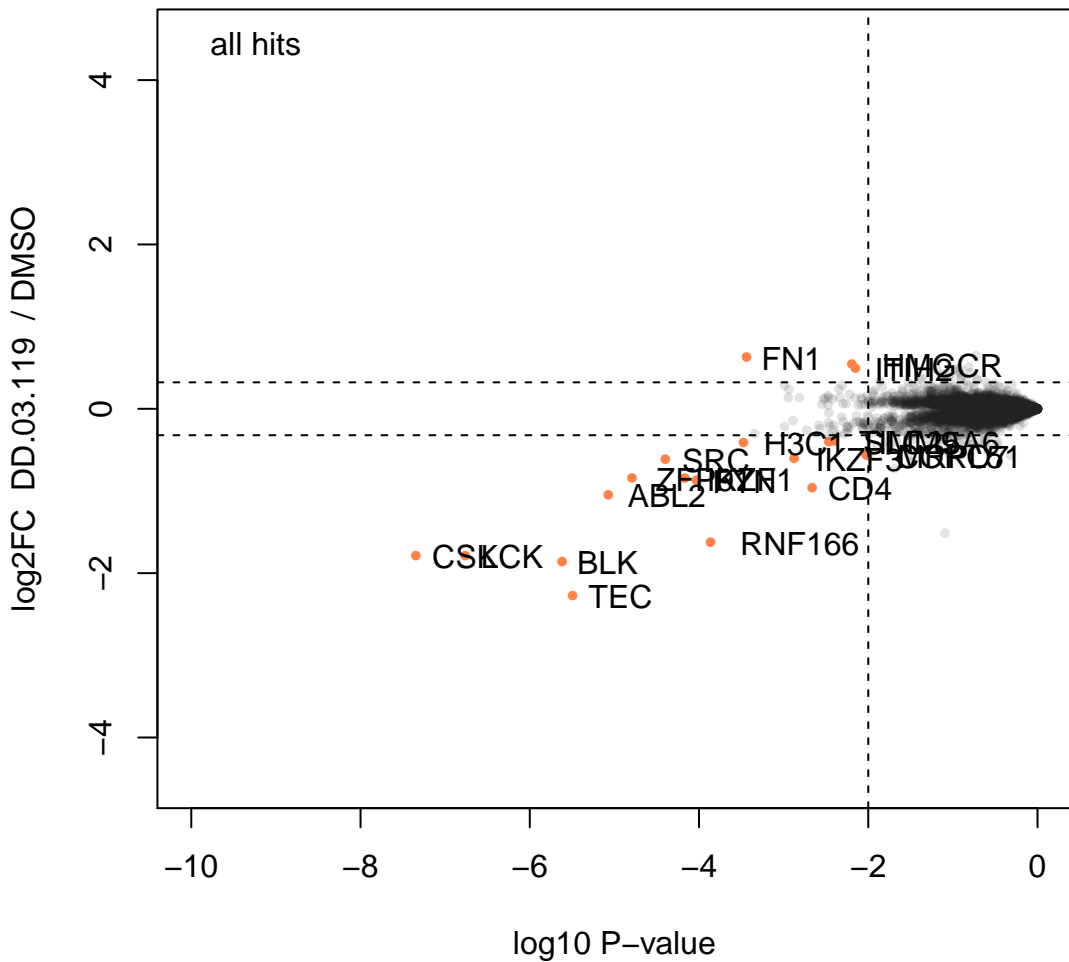

DD.03.119 (wp047)

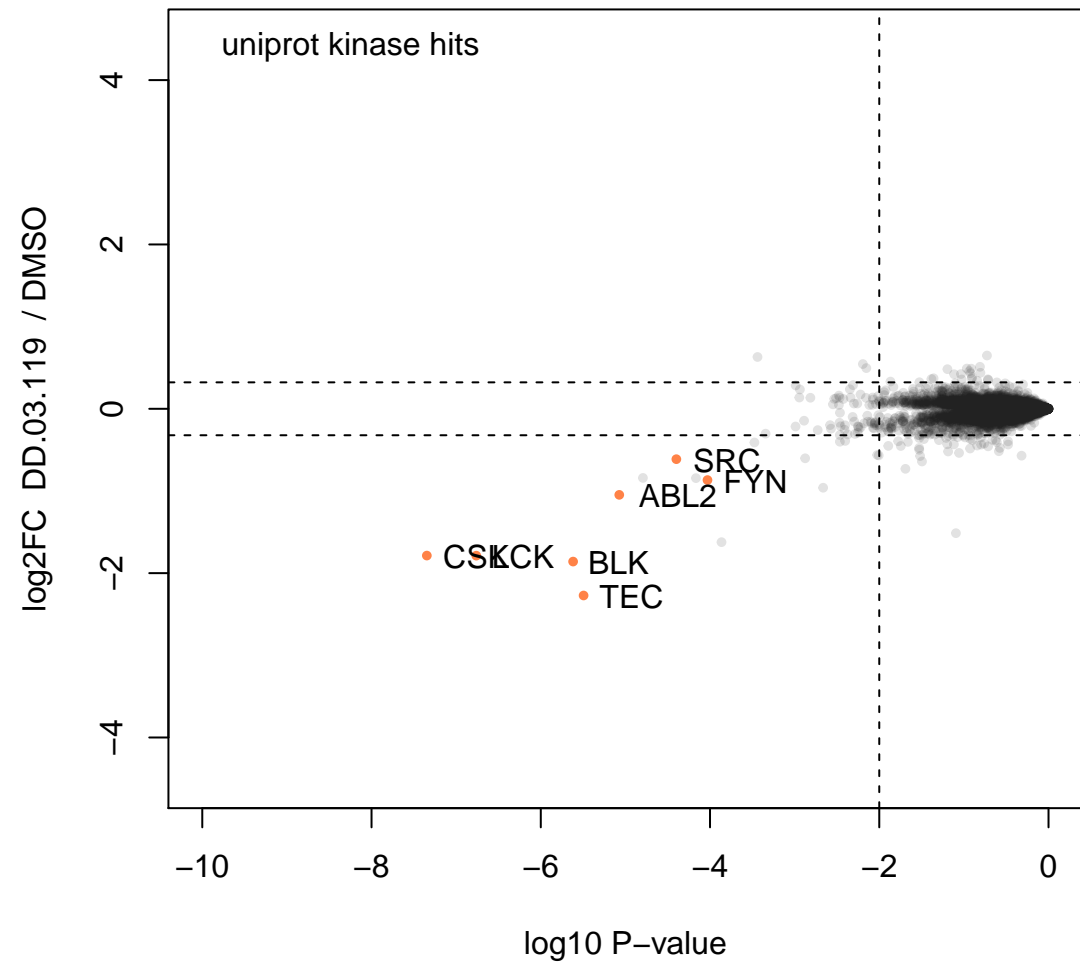

DD.03.171 (wp055)

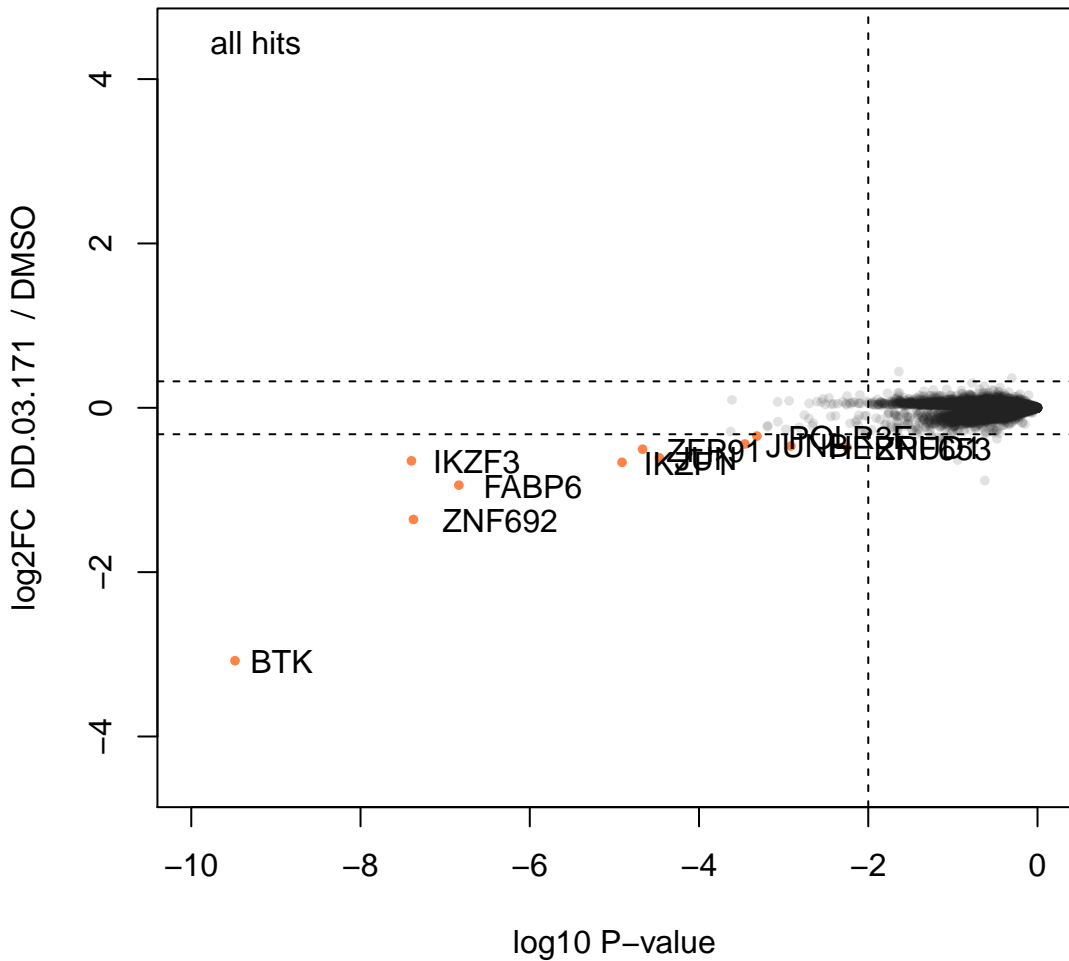

DD.03.171 (wp055)

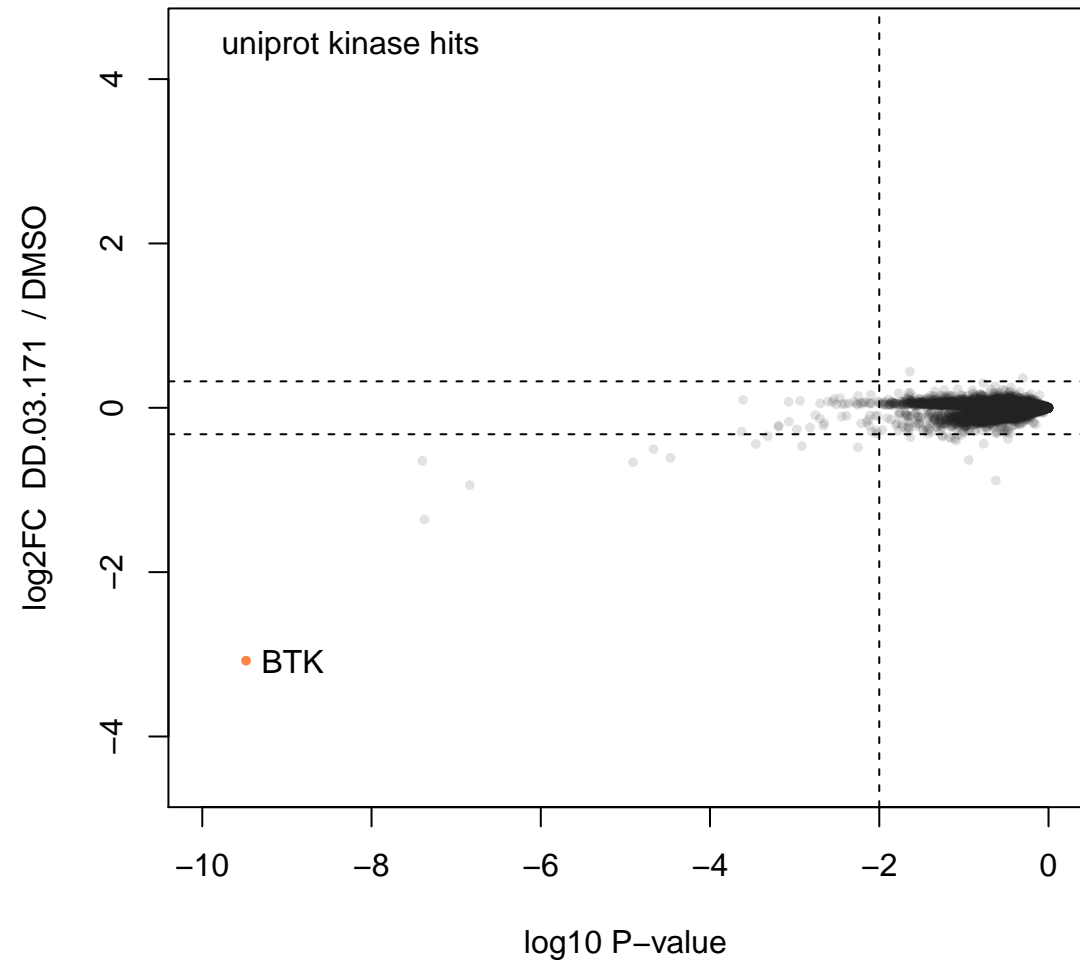

DD.04.118 (wp055)

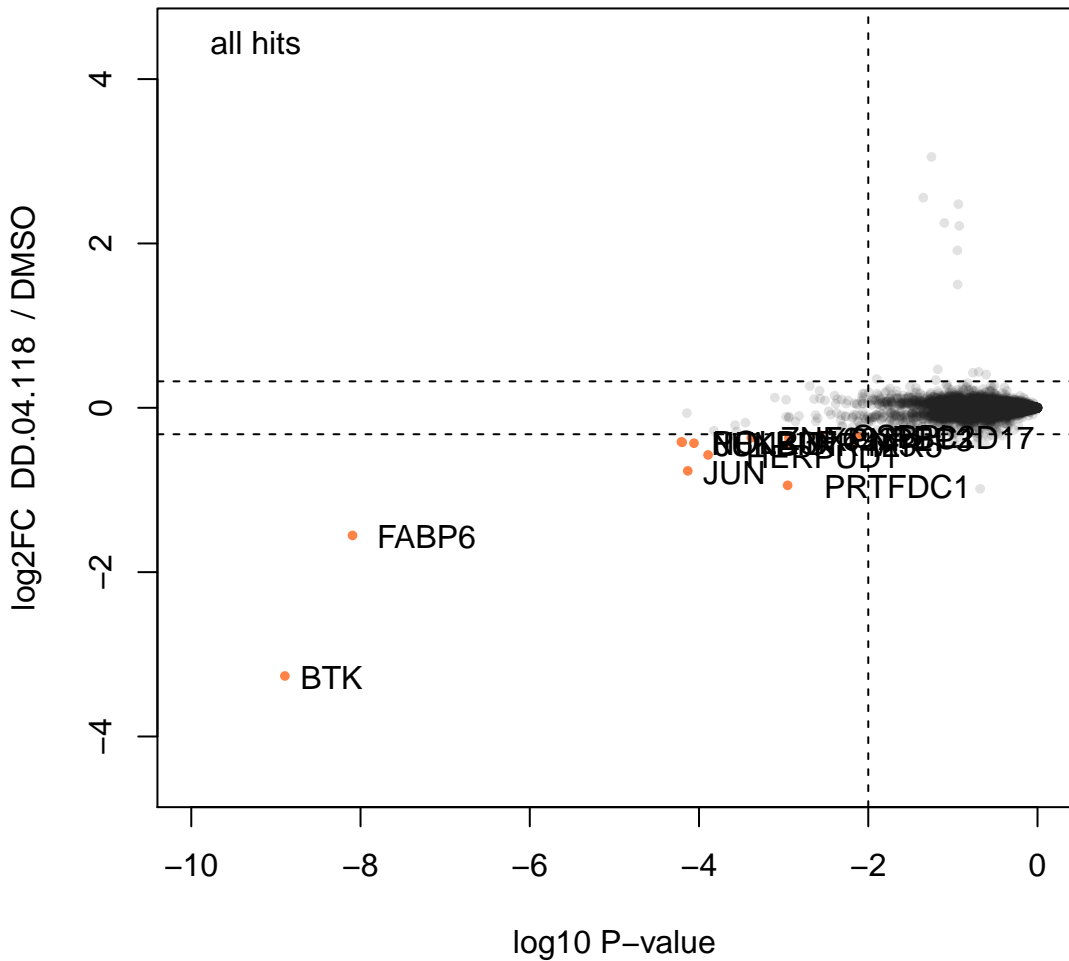

DD.04.118 (wp055)

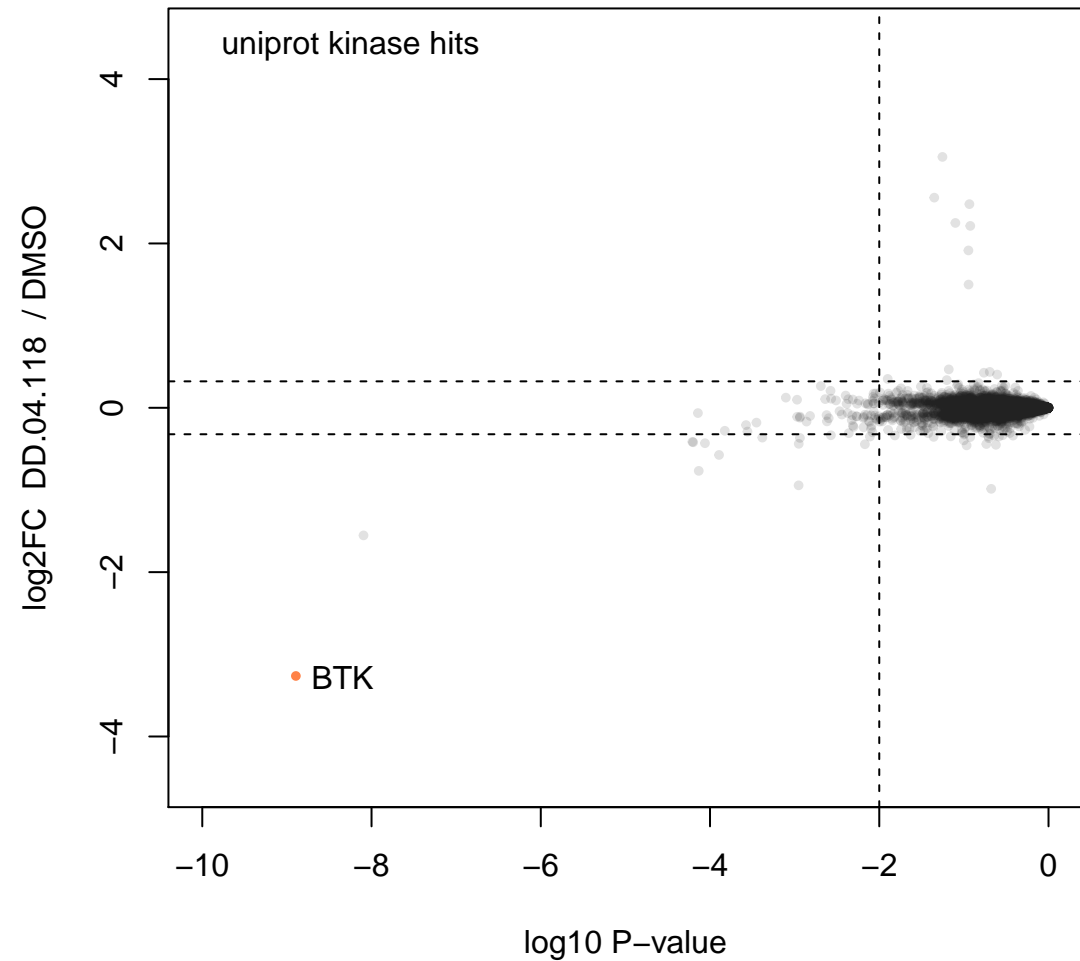



DD.03.107 (wp056)

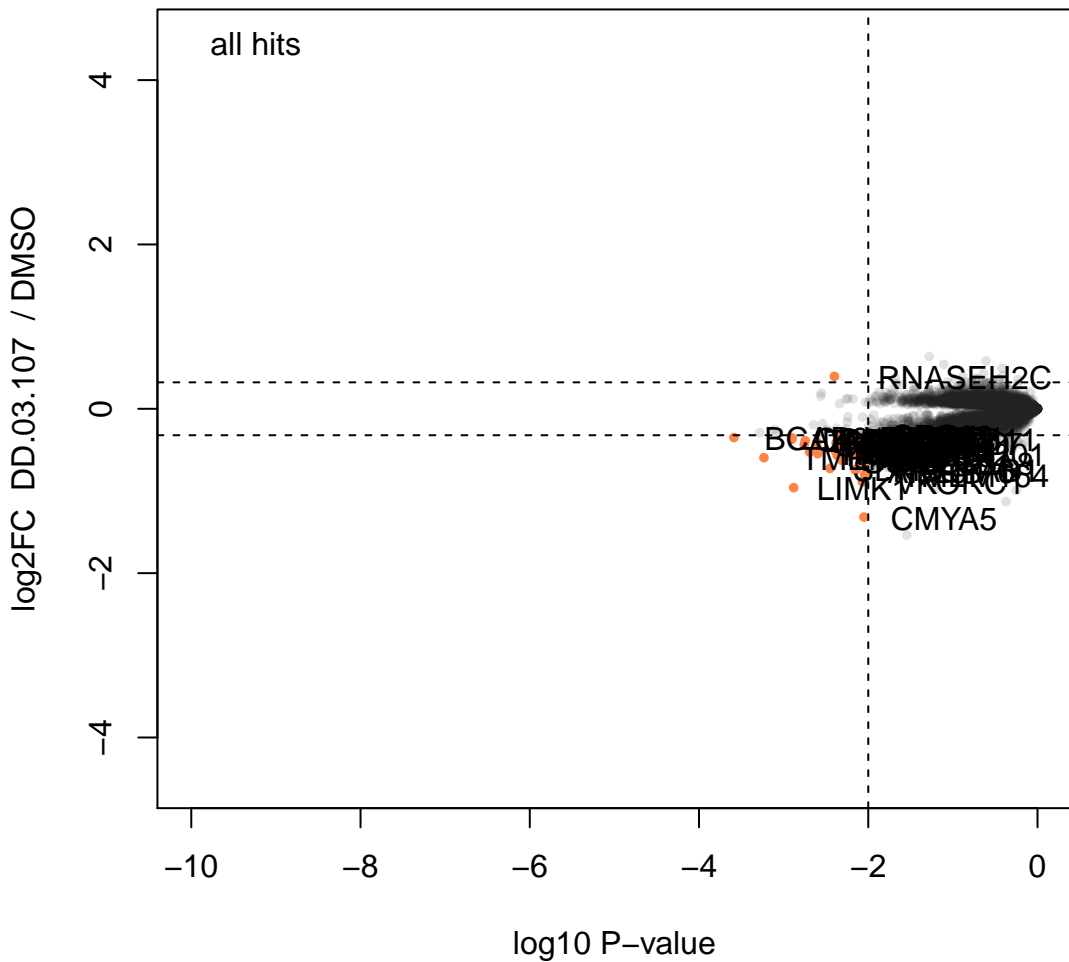

DD.03.107 (wp056)

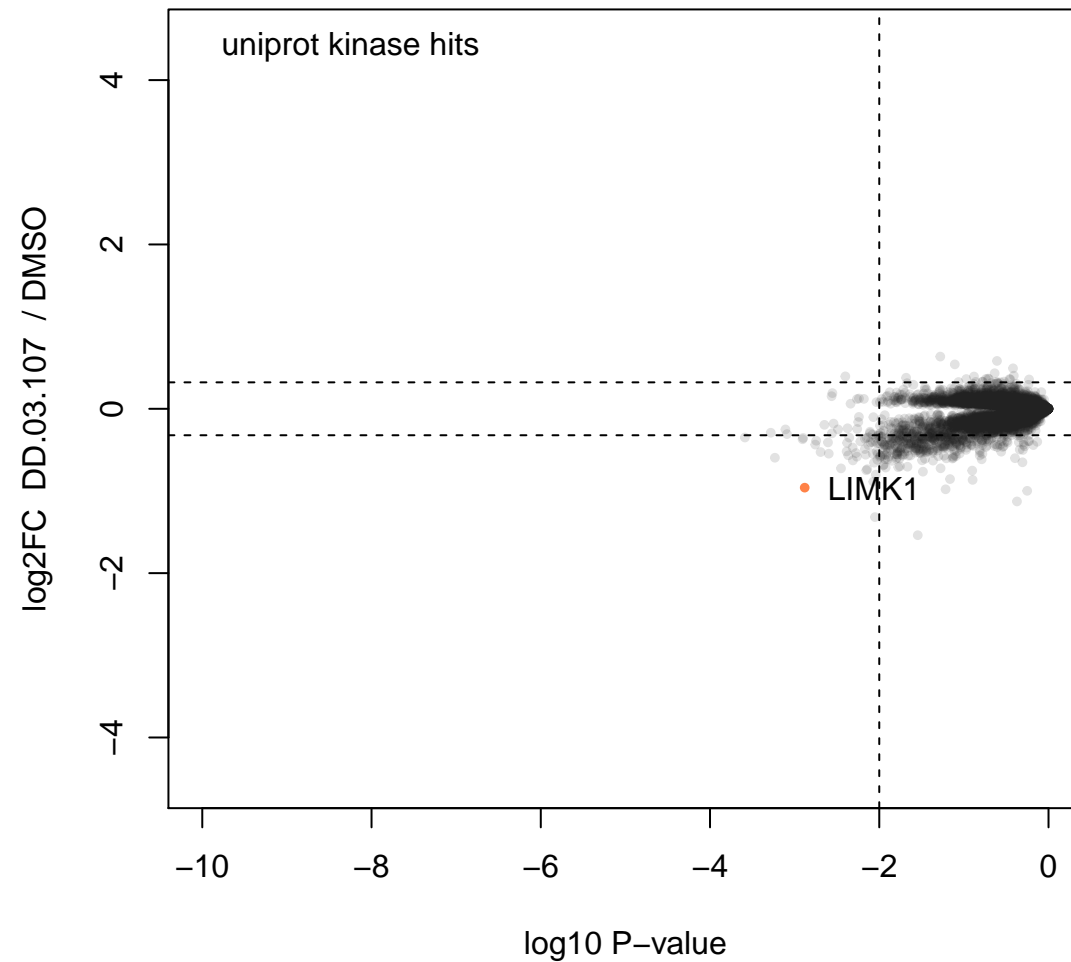

SB1.G.187 (wp056)

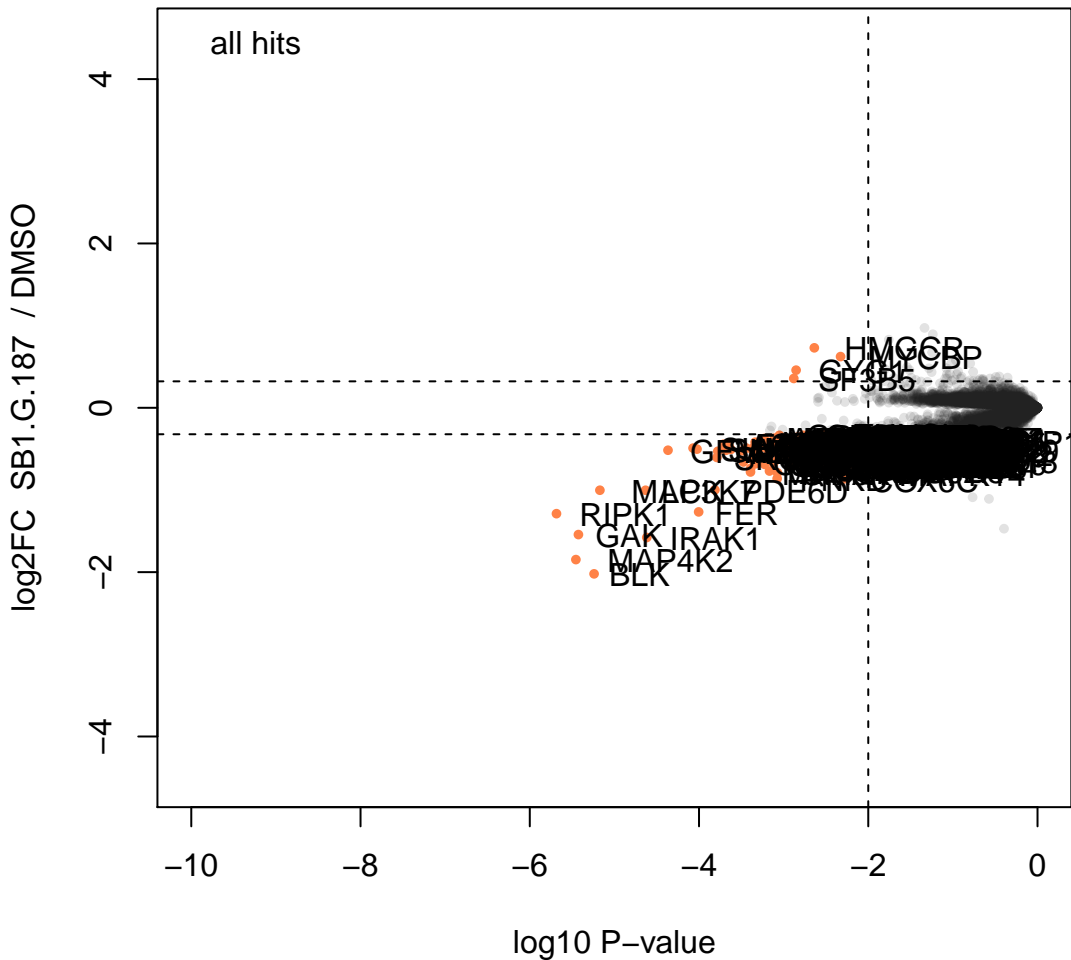

SB1.G.187 (wp056)

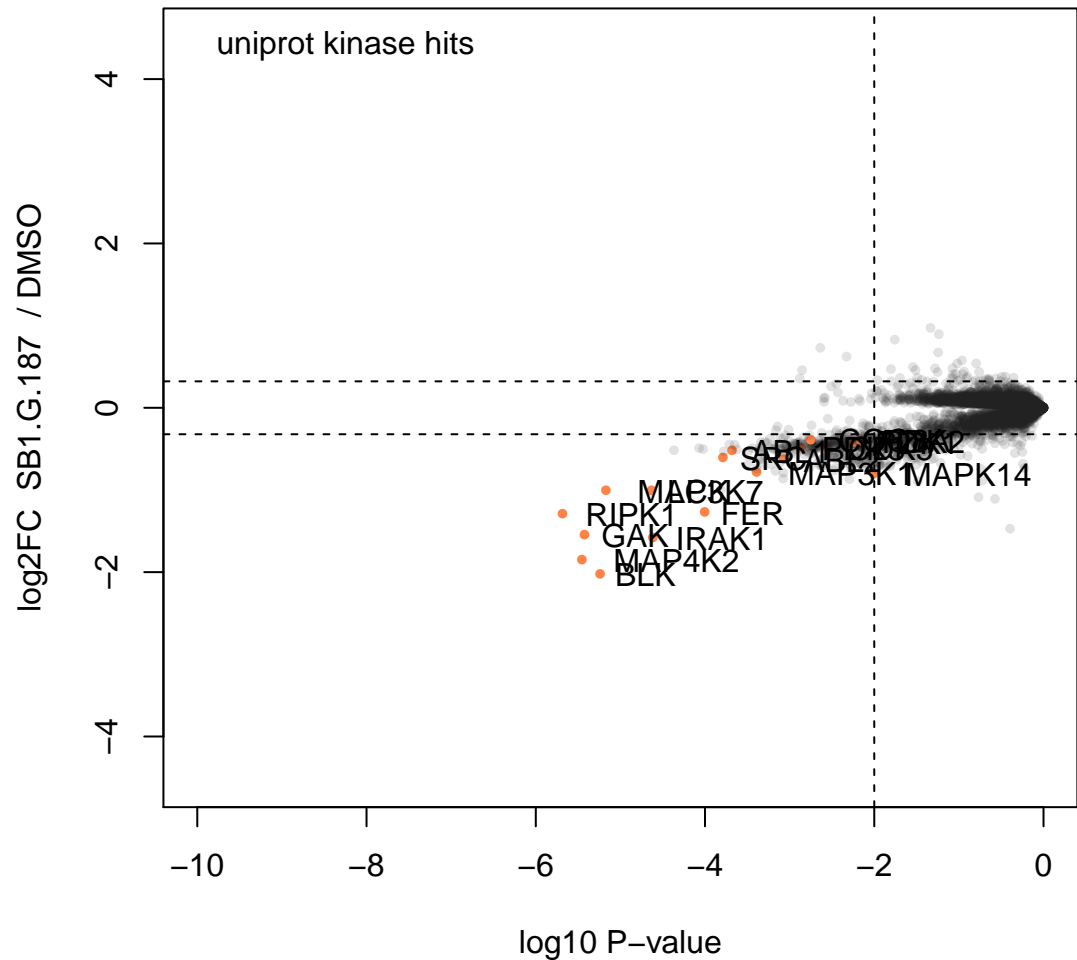

ZNL.02.096 (wp056)

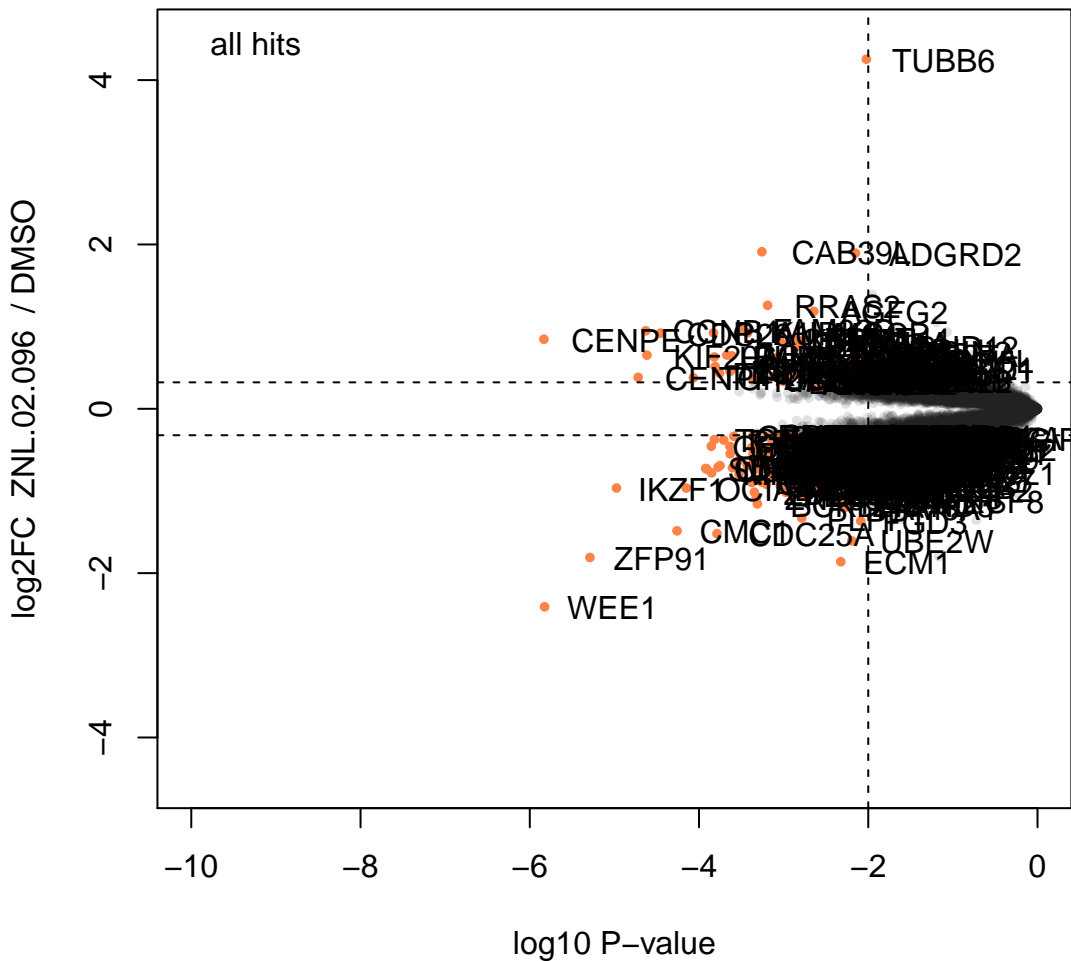

ZNL.02.096 (wp056)

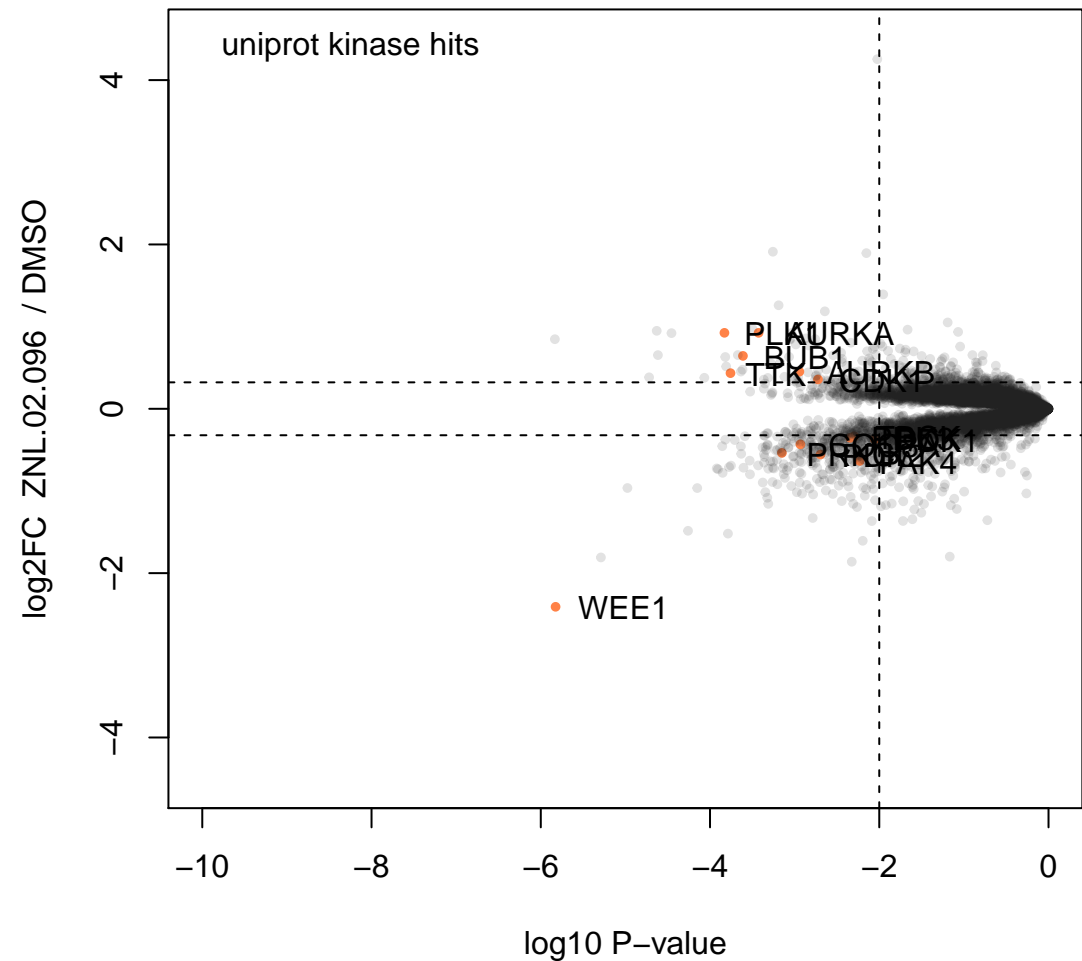

DD.03.156 (wp056)

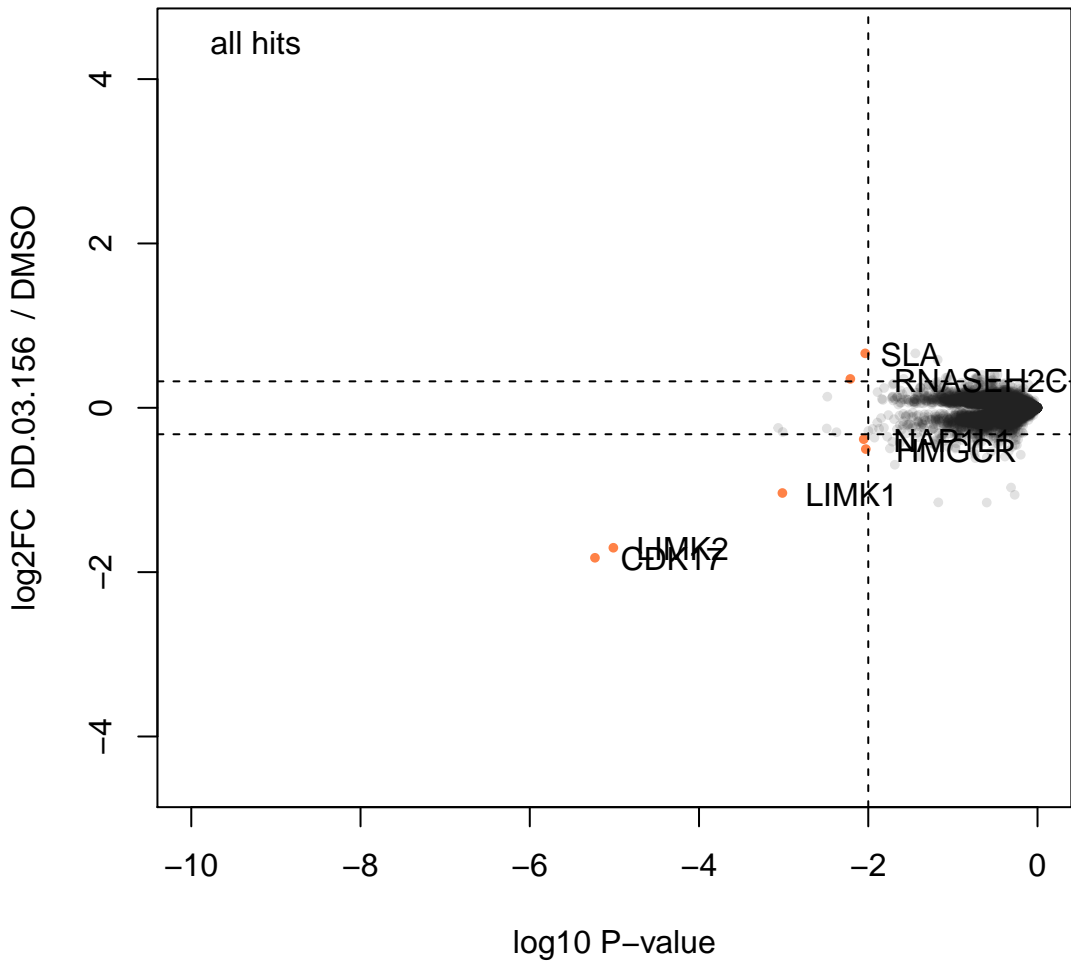

DD.03.156 (wp056)

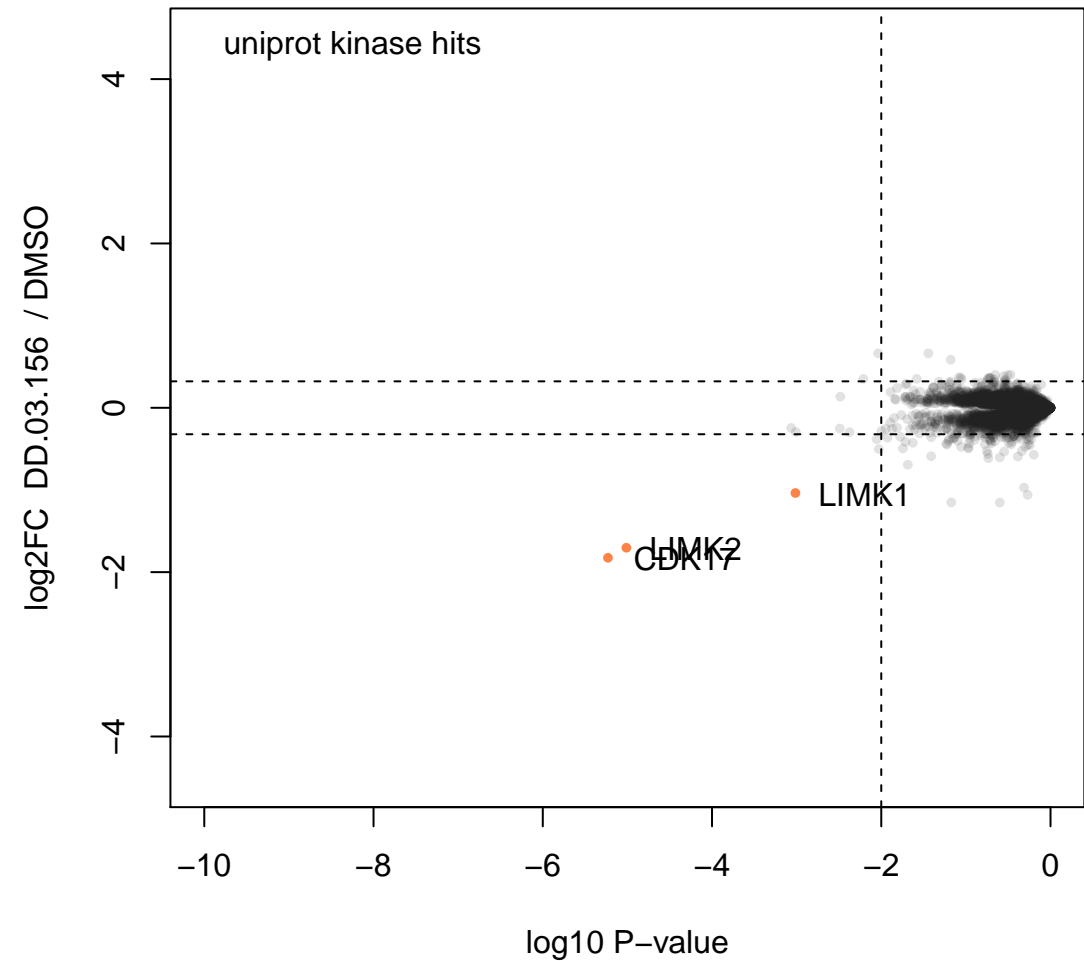



WH.10417.099 (wp056)

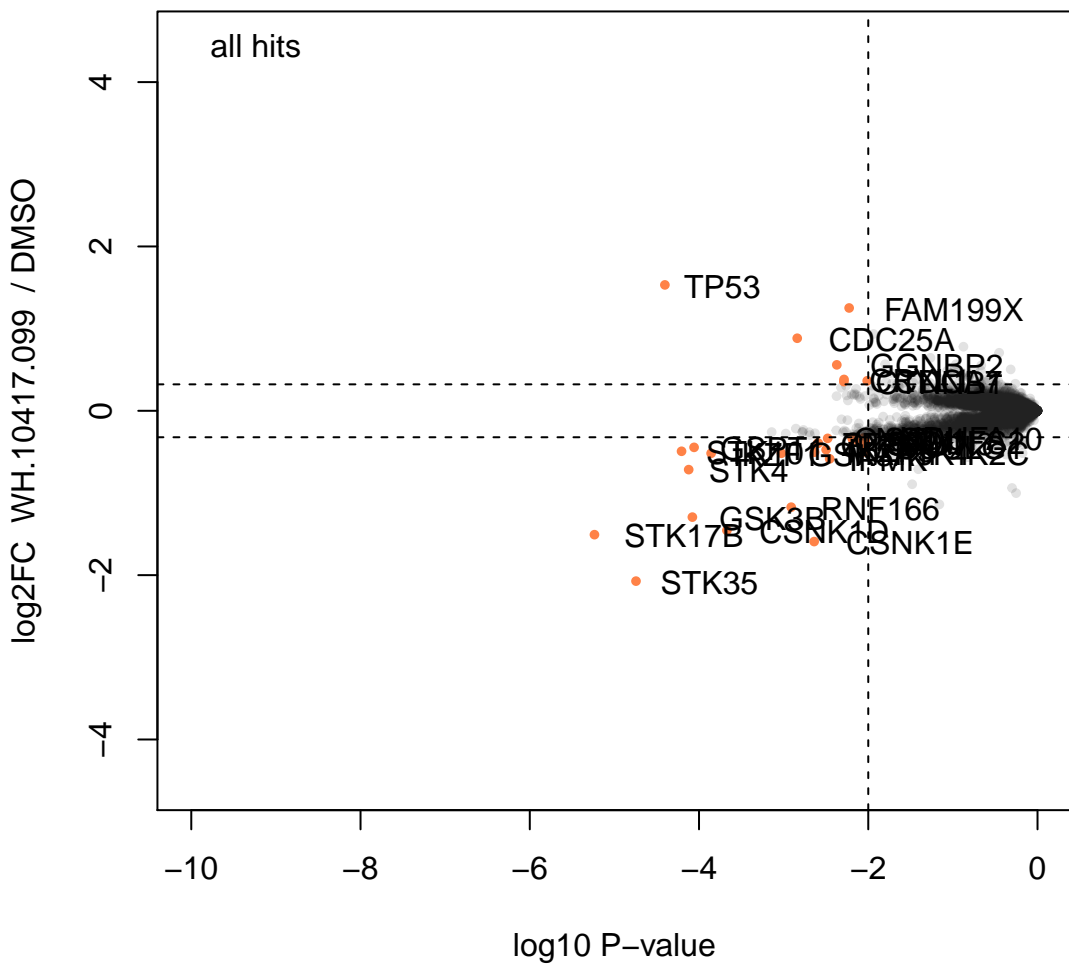

WH.10417.099 (wp056)

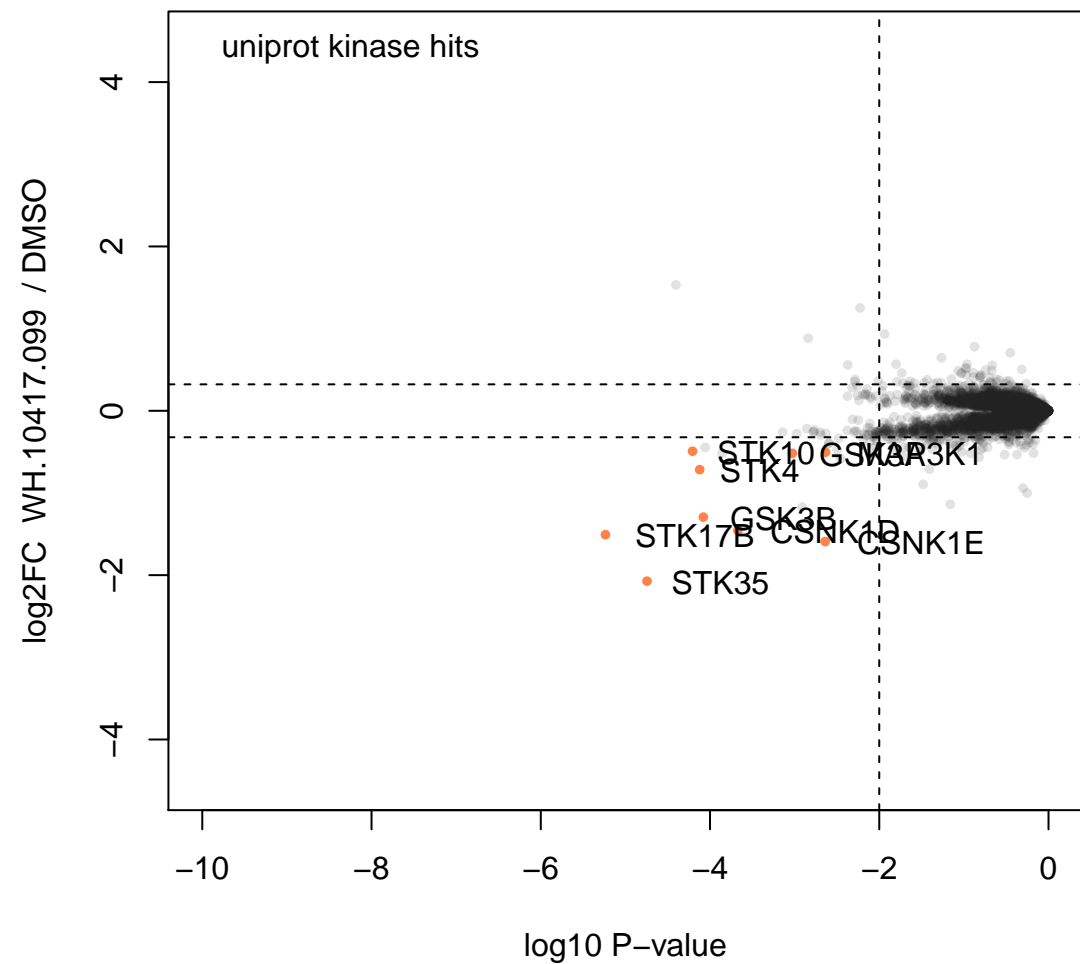

FMF.04.147.1 (wp068)

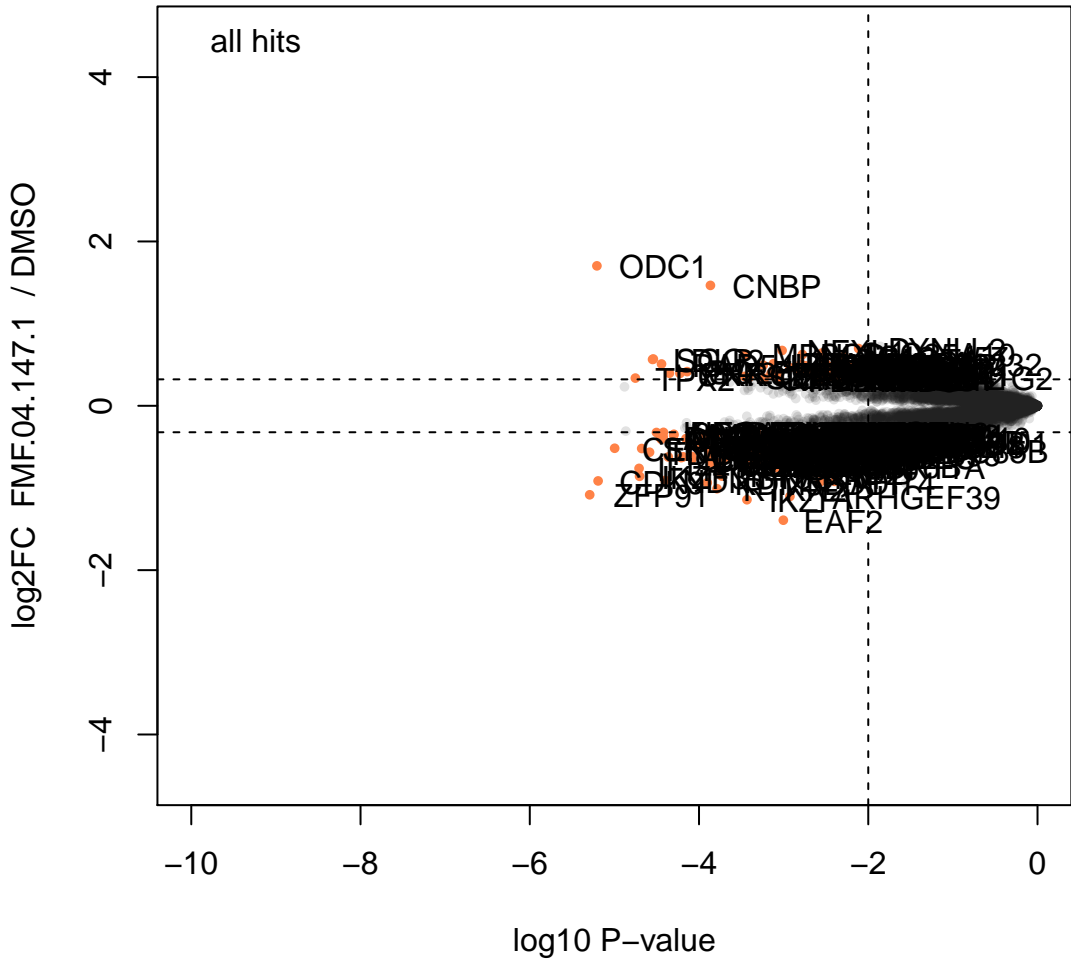

FMF.04.147.1 (wp068)

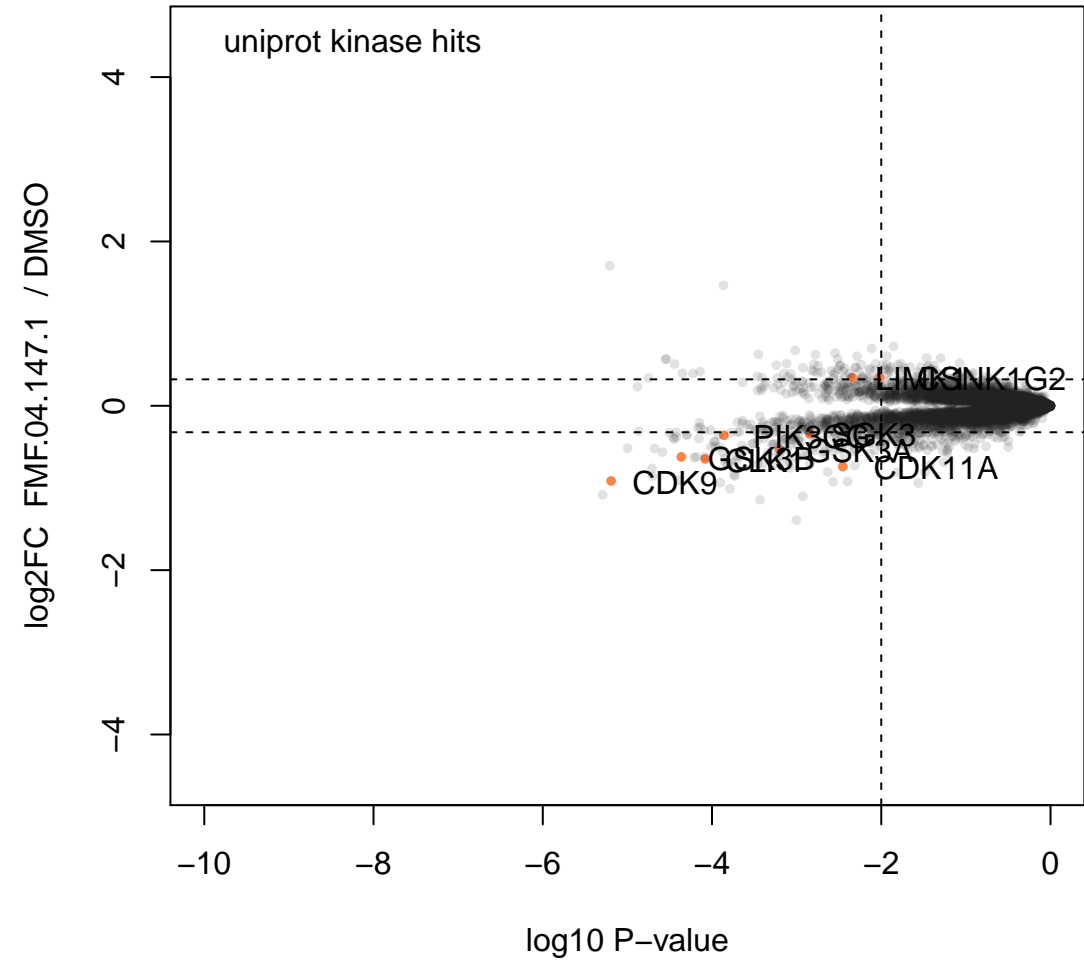

FMF.05.178.1 (wp071)

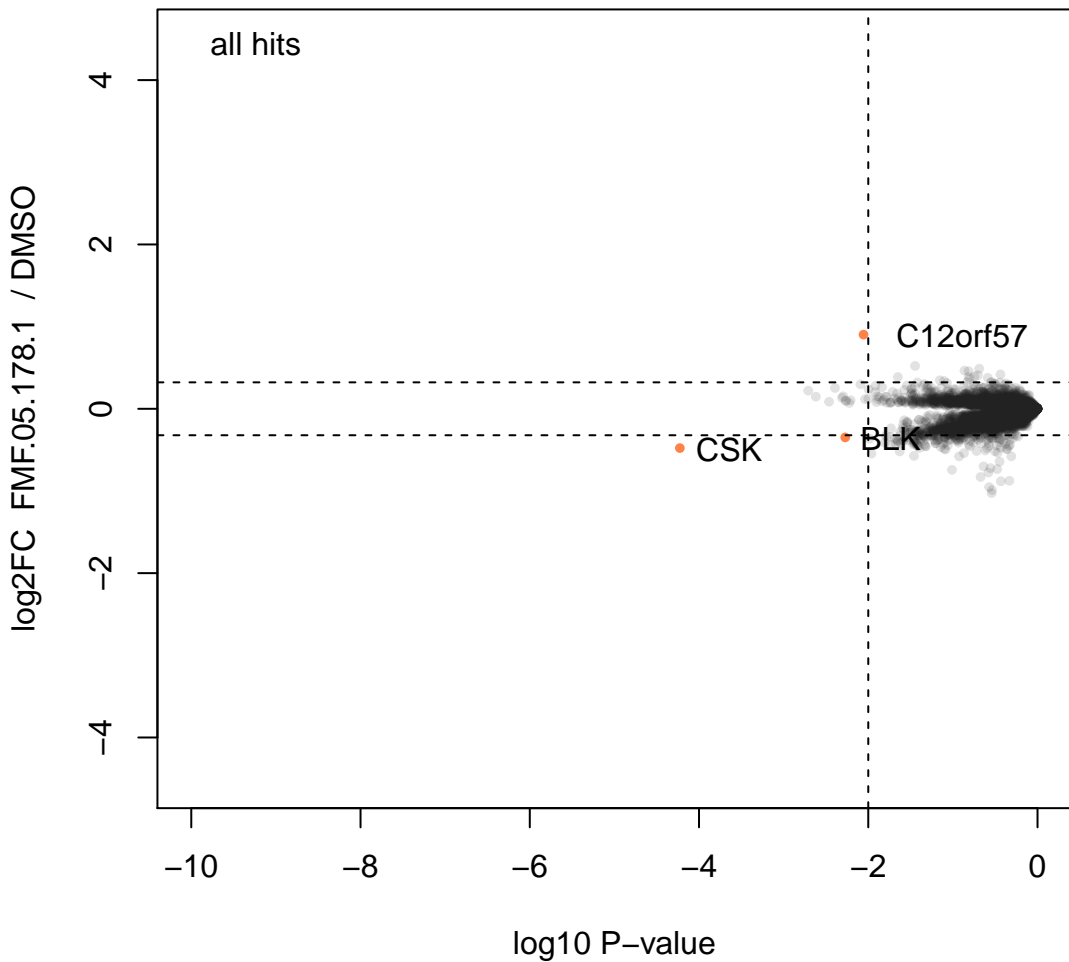

FMF.05.178.1 (wp071)

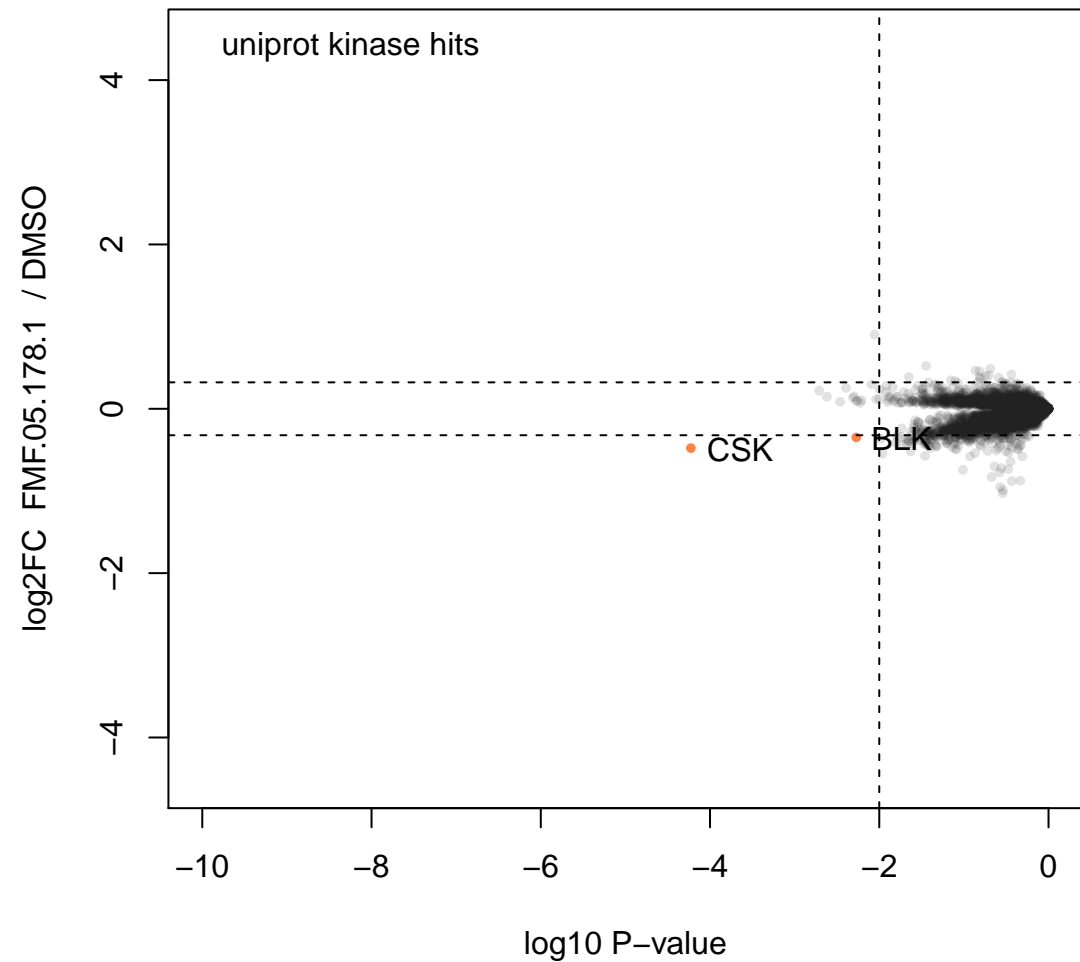



SB1.G.192.1 (wp071)

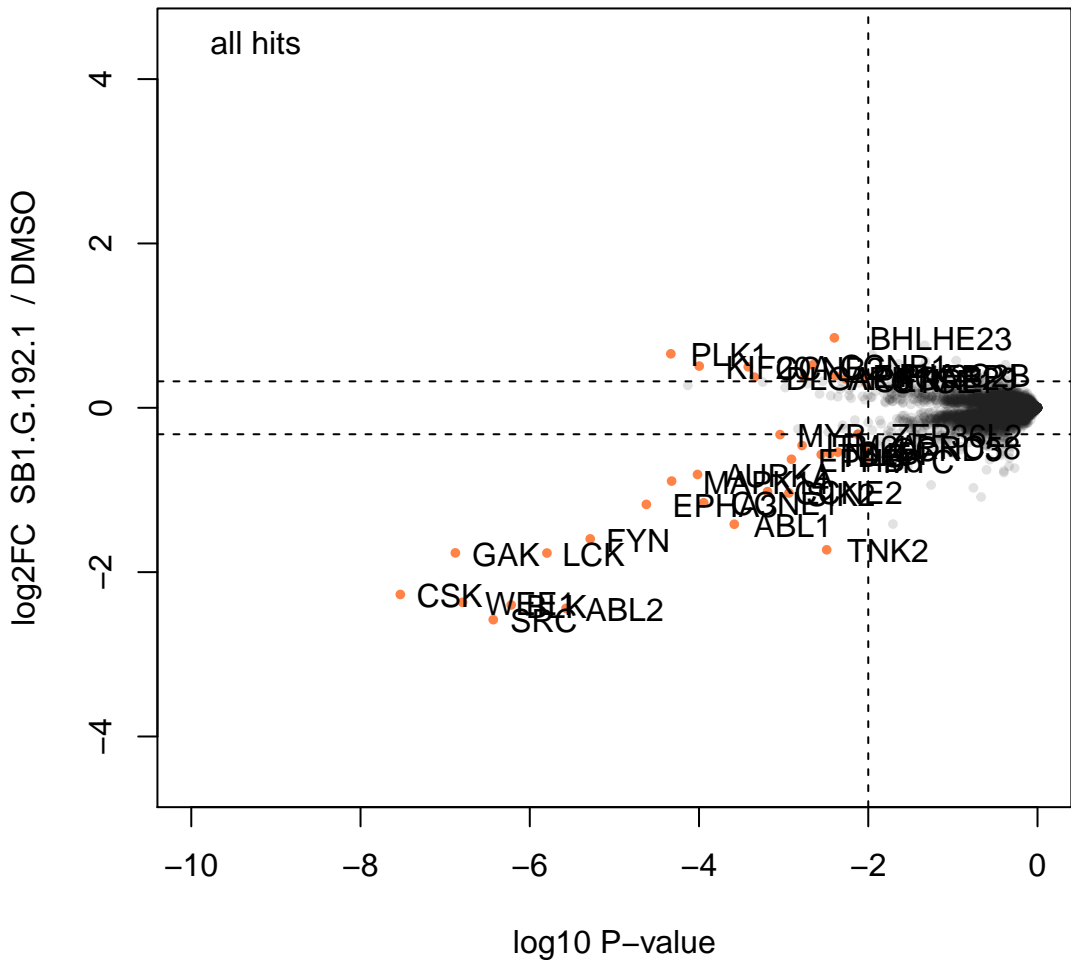

SB1.G.192.1 (wp071)

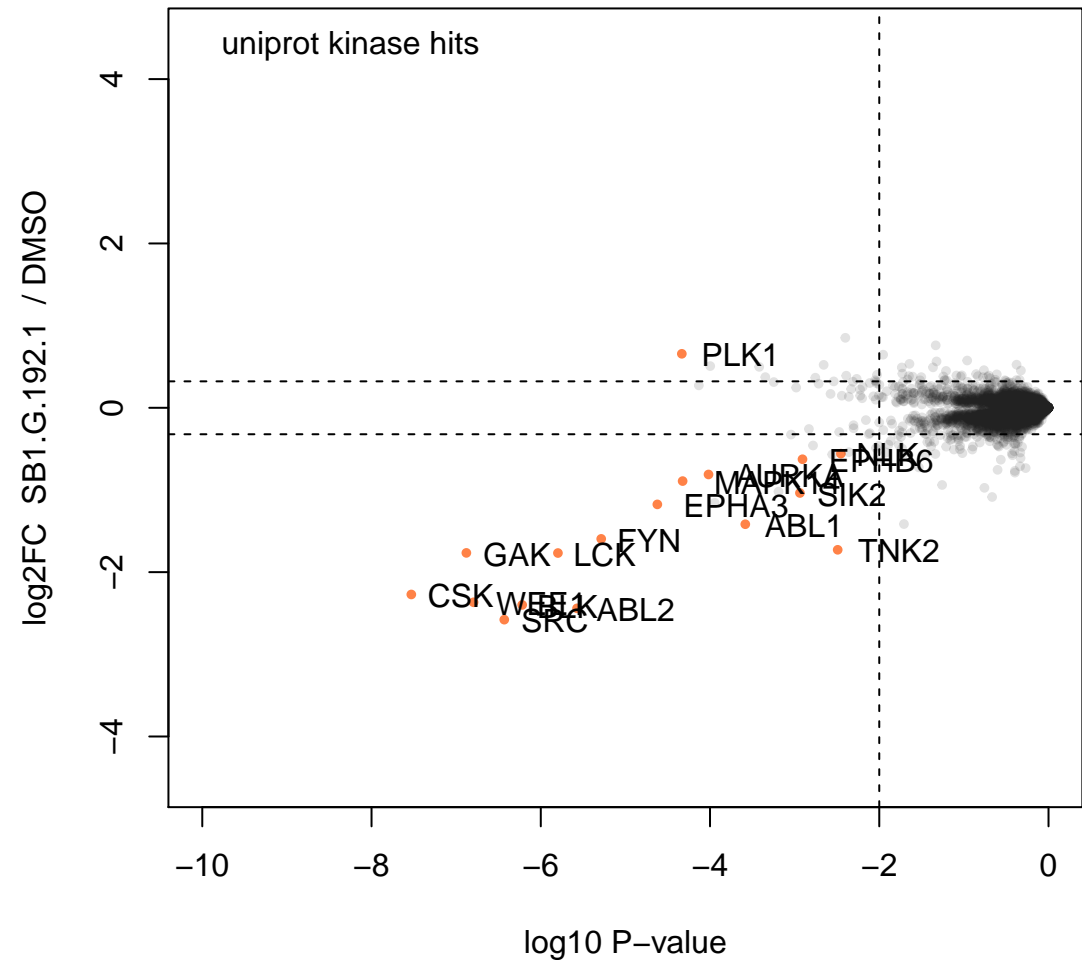

### SB1.G.181 (wp071)

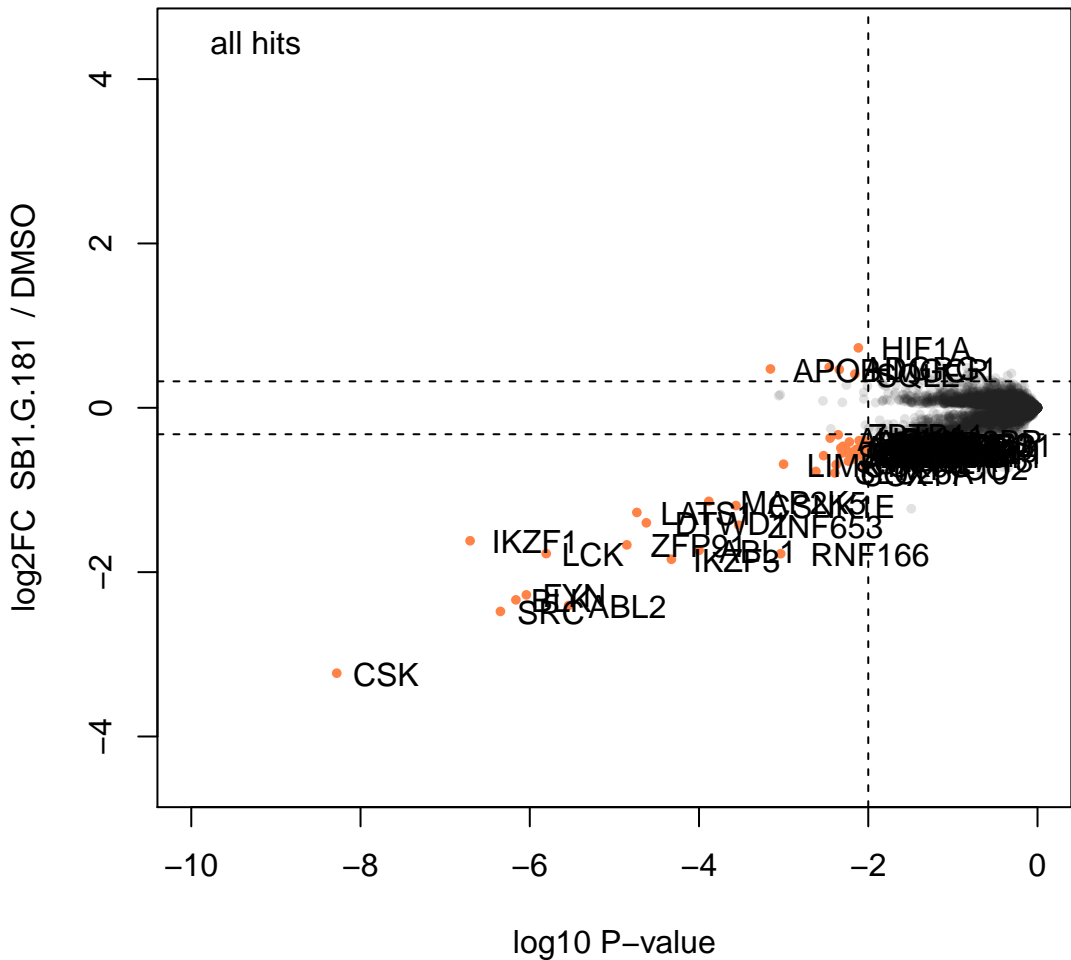

### SB1.G.181 (wp071)

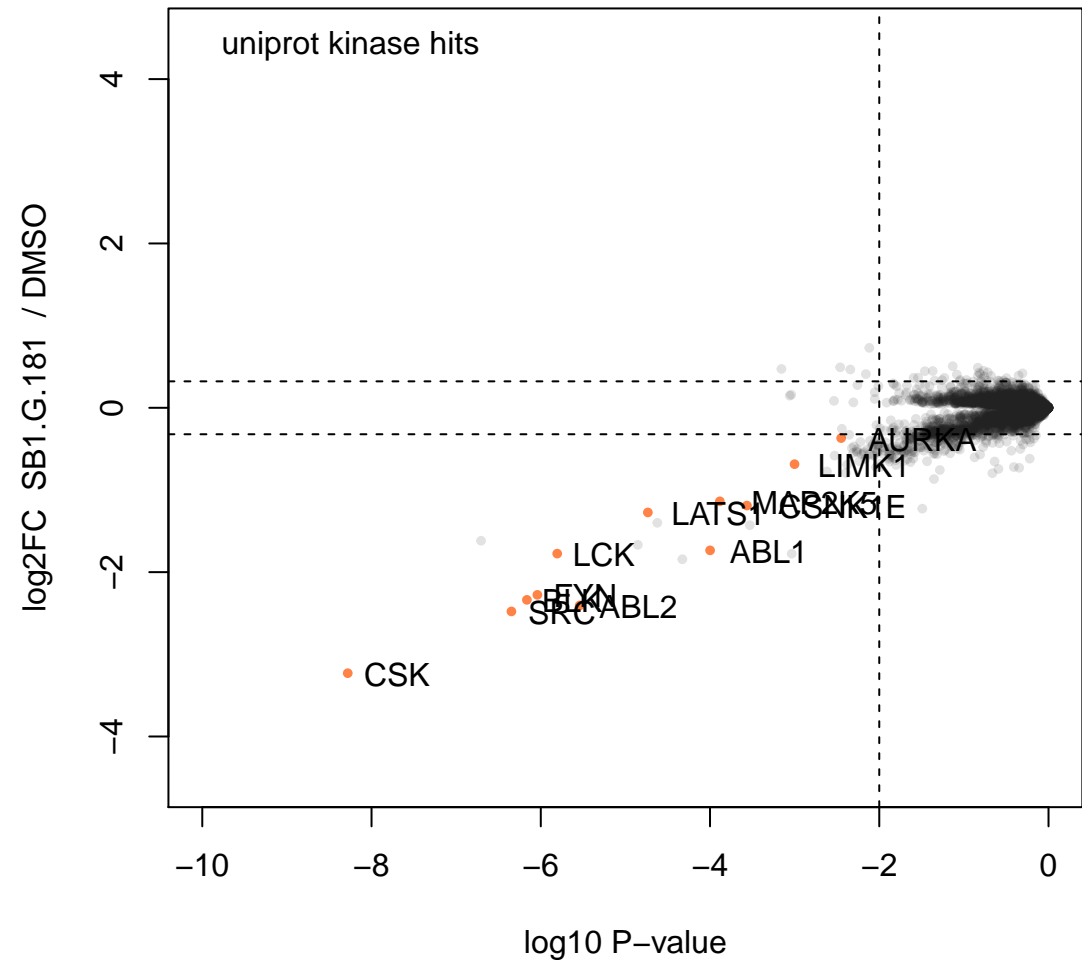

FMF.04.135.1 (wp071)

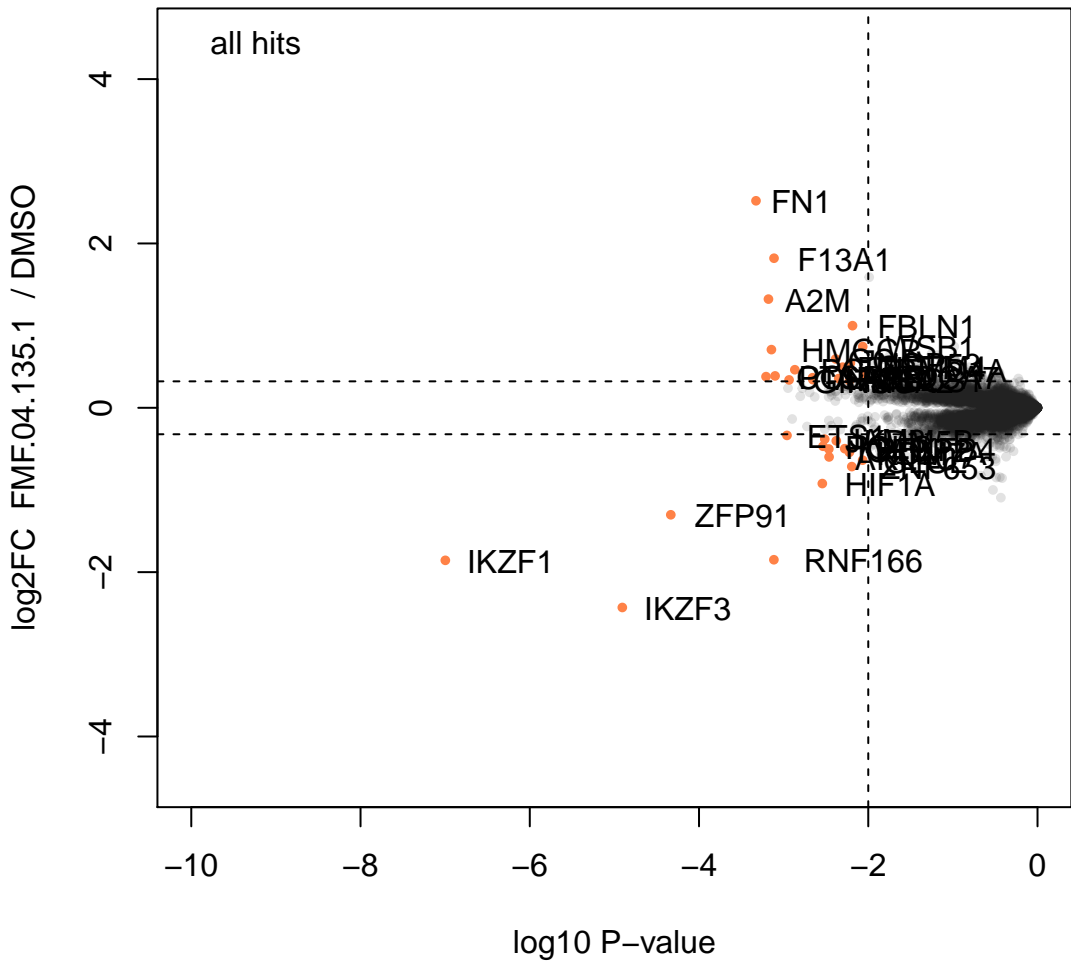

FMF.04.135.1 (wp071)

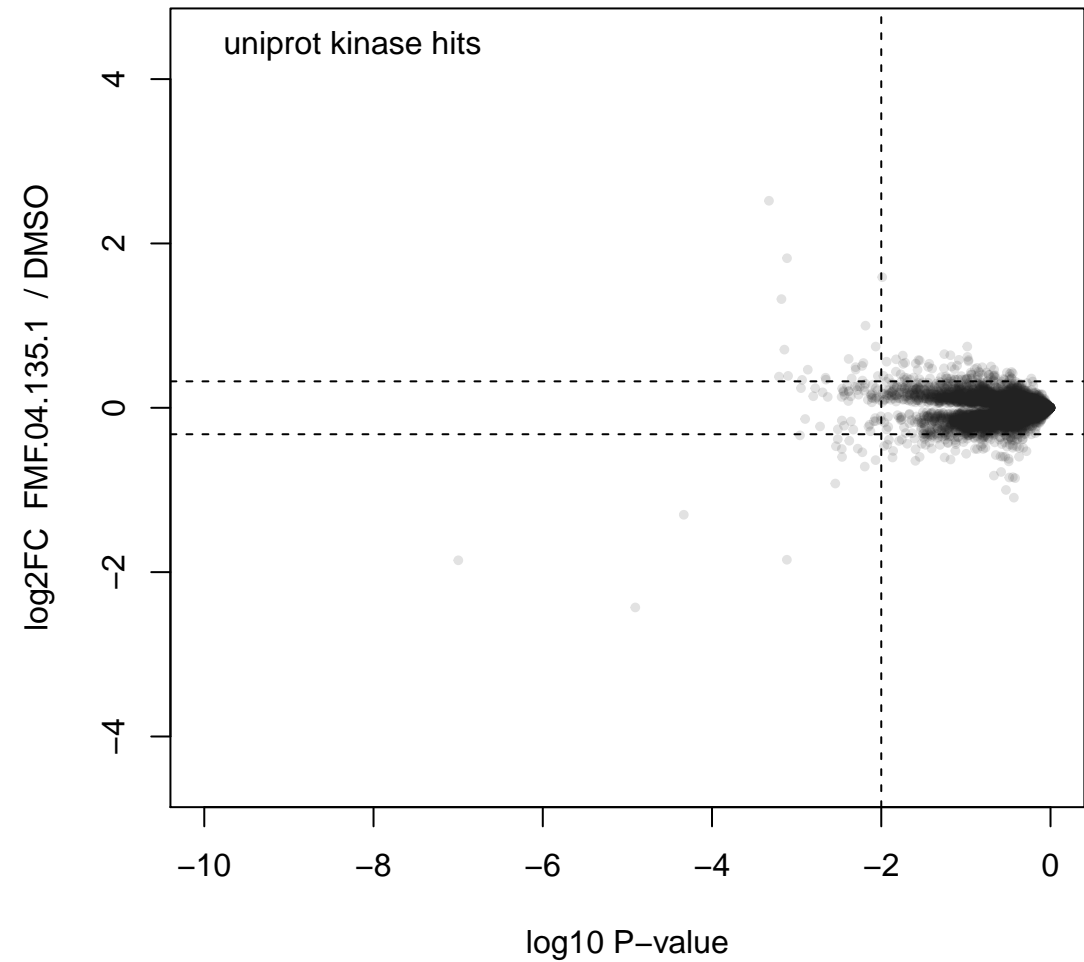

JWG.118 (wp071)

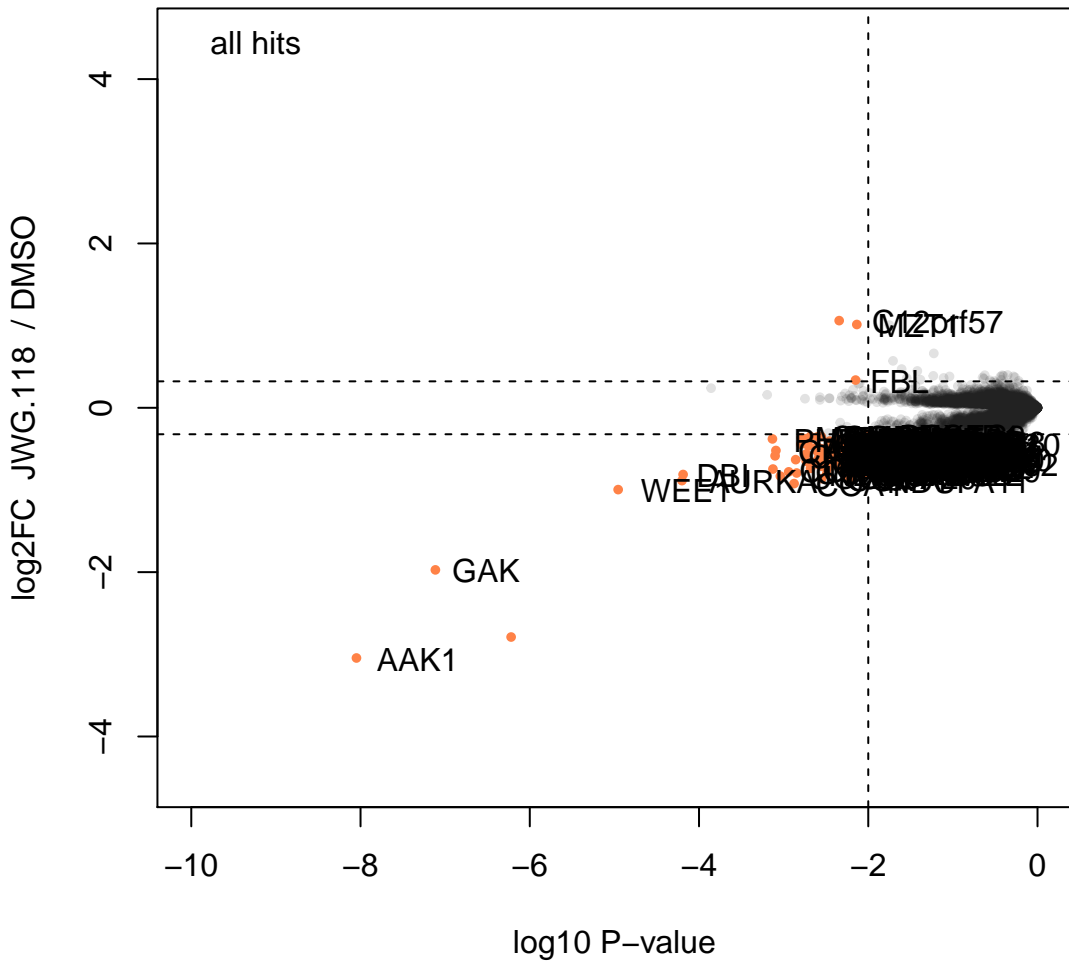

JWG.118 (wp071)

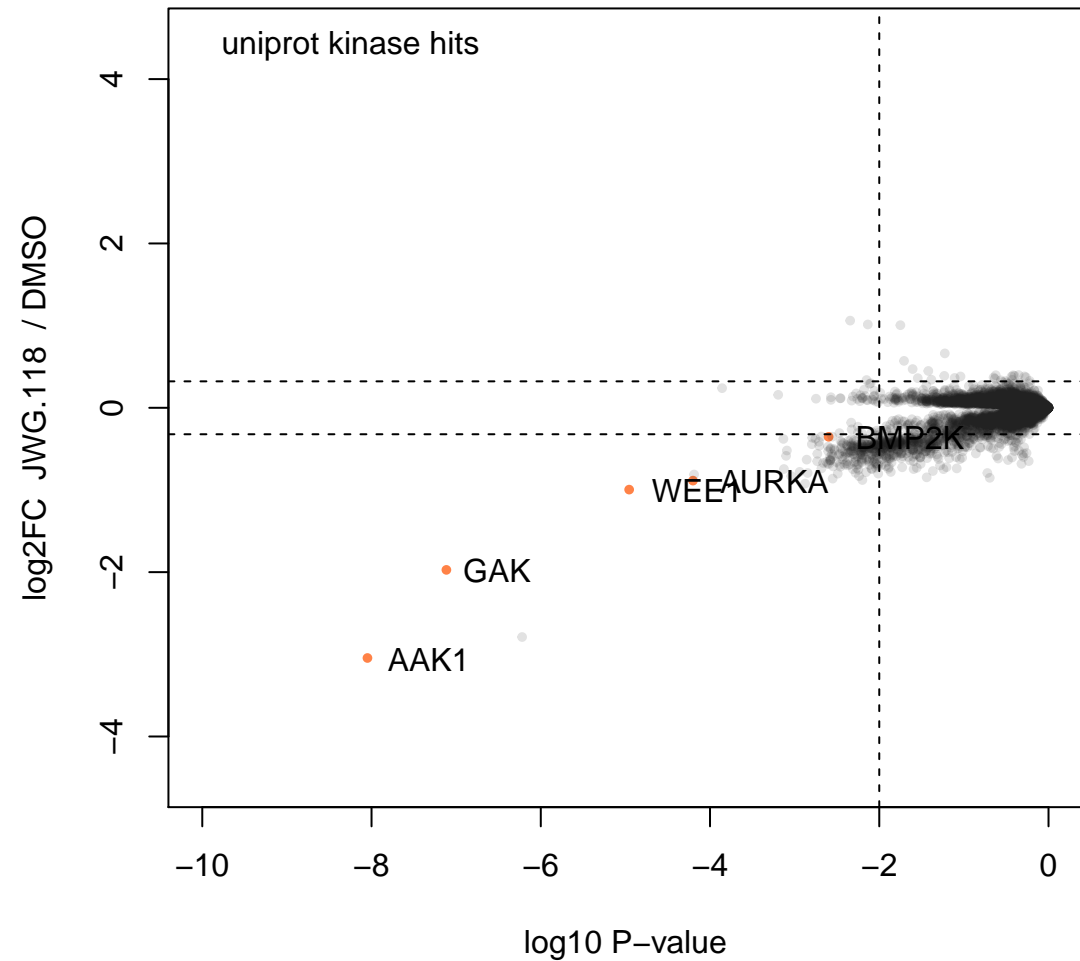



ImantinIMiD.2 (wp074)

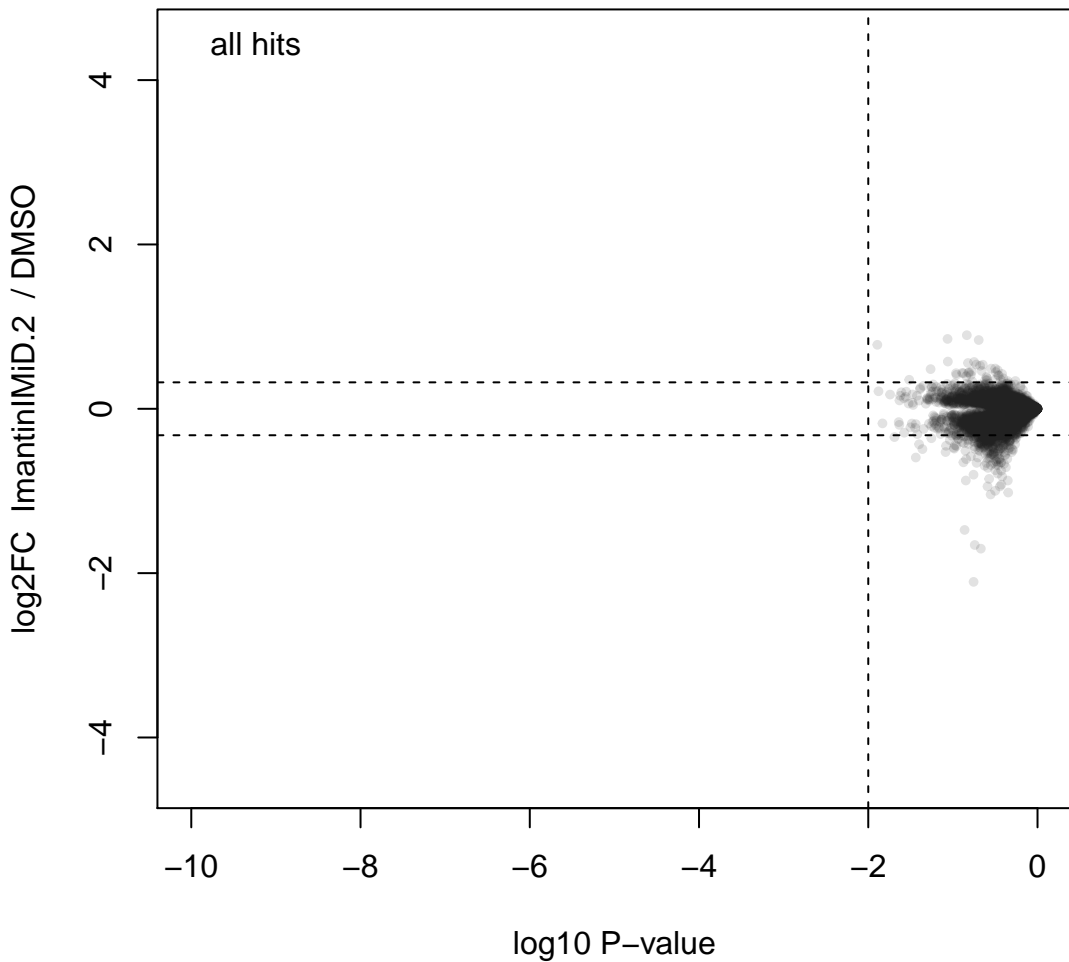

ImantinIMiD.2 (wp074)

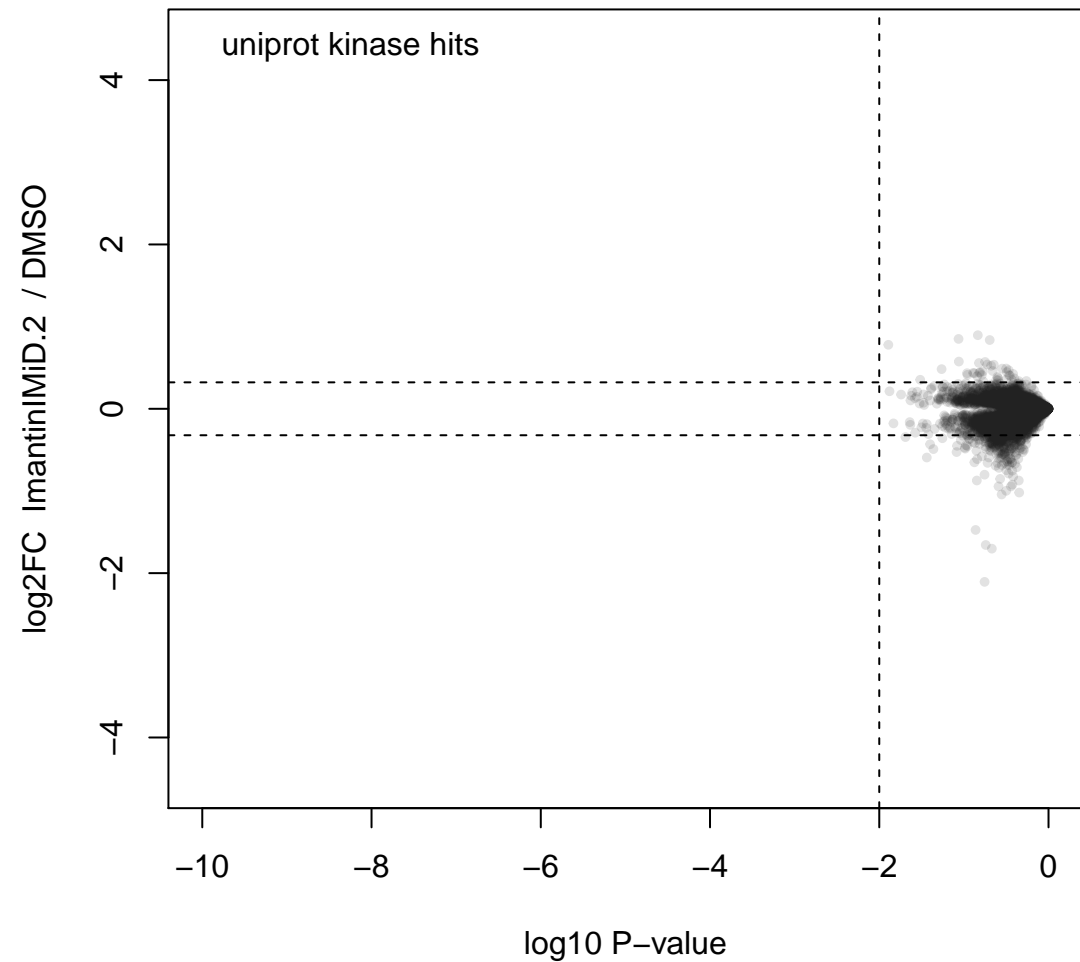

ImantinIMiD.5 (wp074)

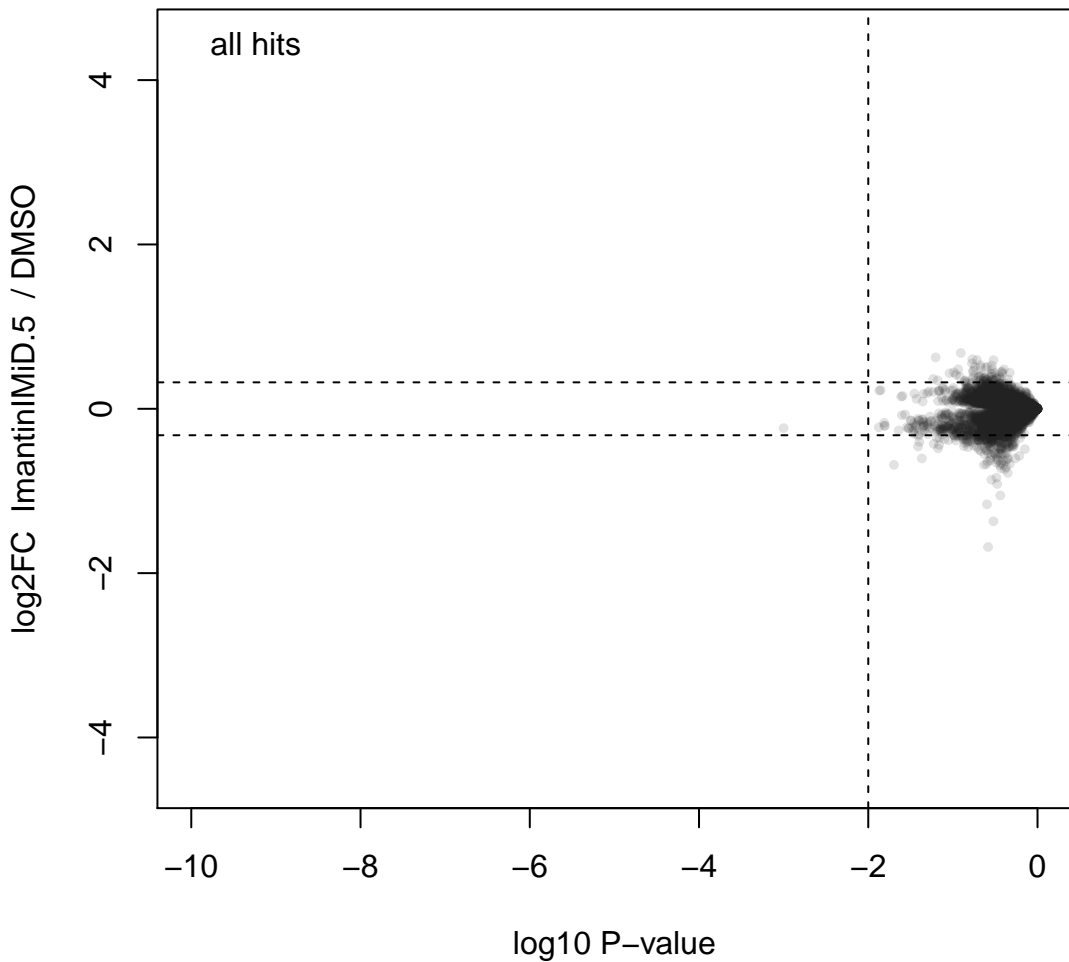

ImantinIMiD.5 (wp074)

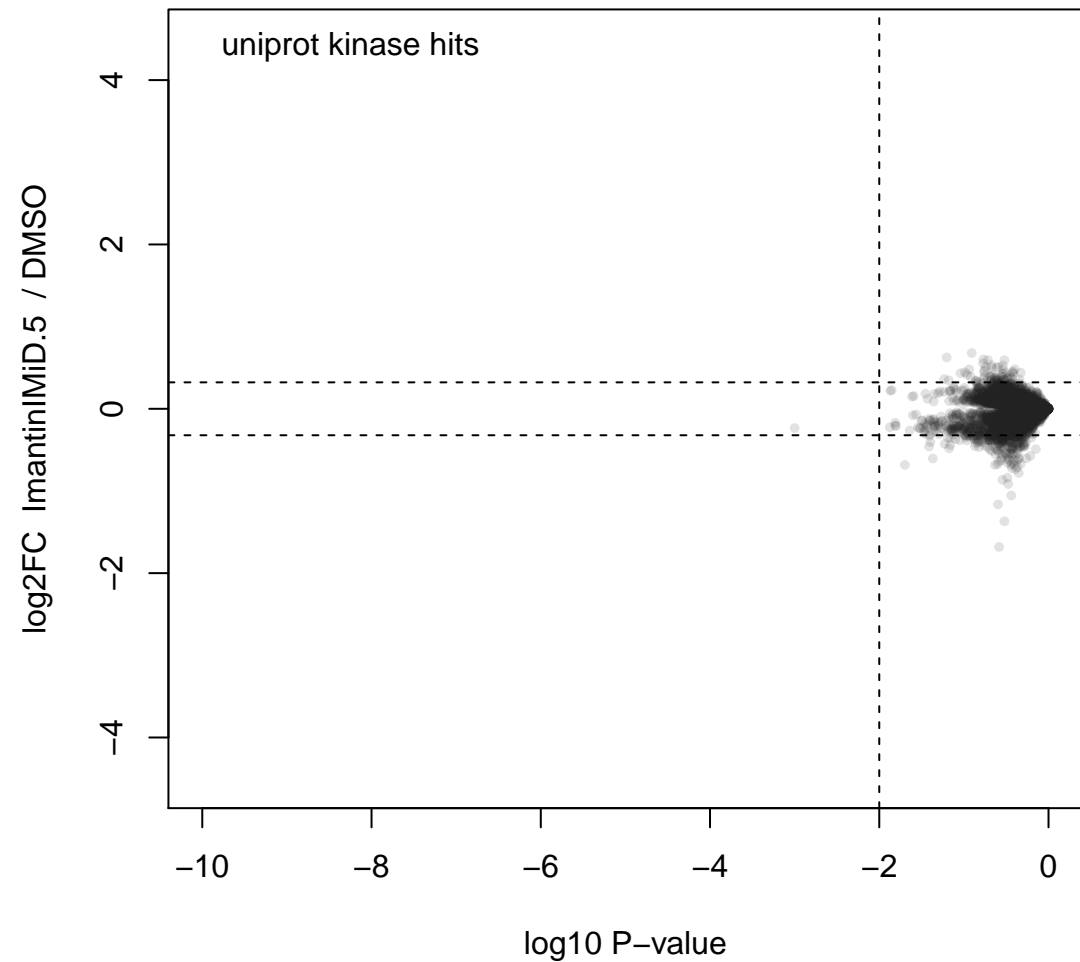

dRAF.3 (wp074)

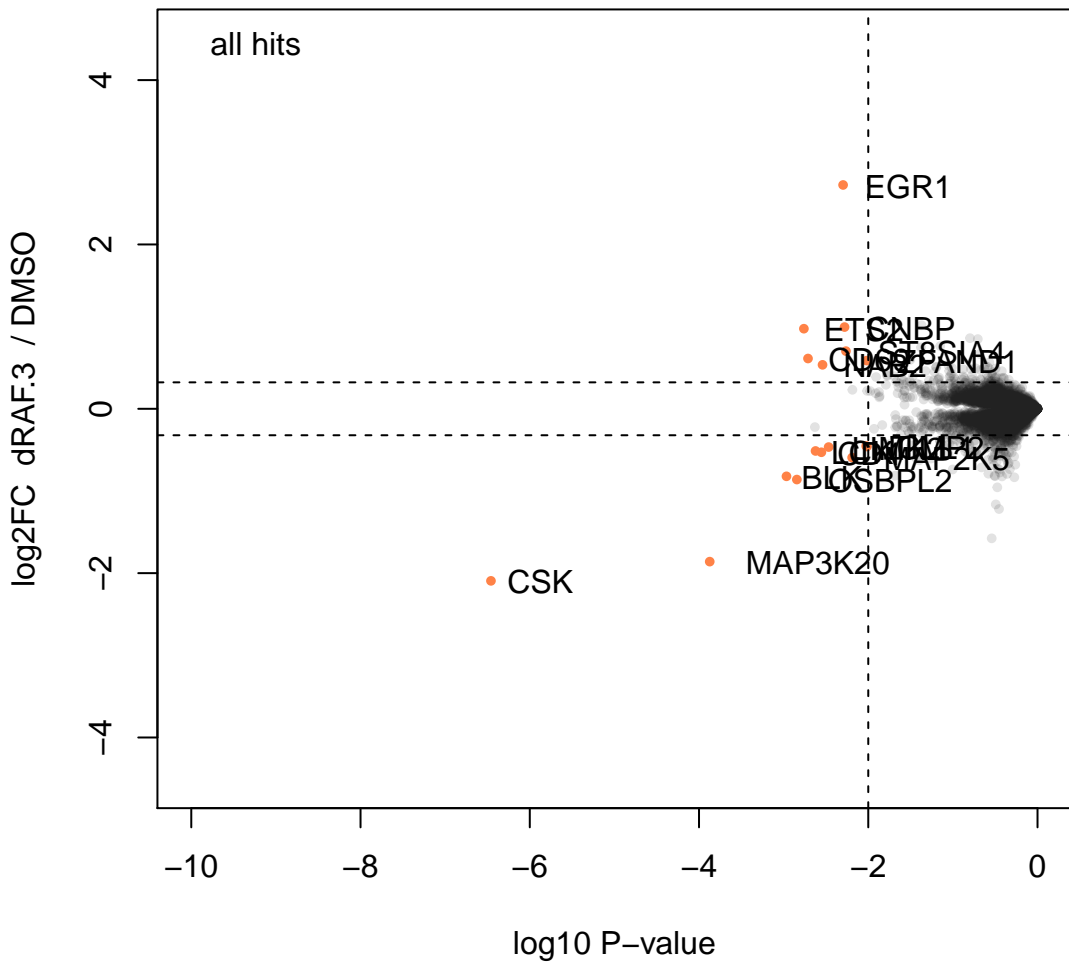

dRAF.3 (wp074)

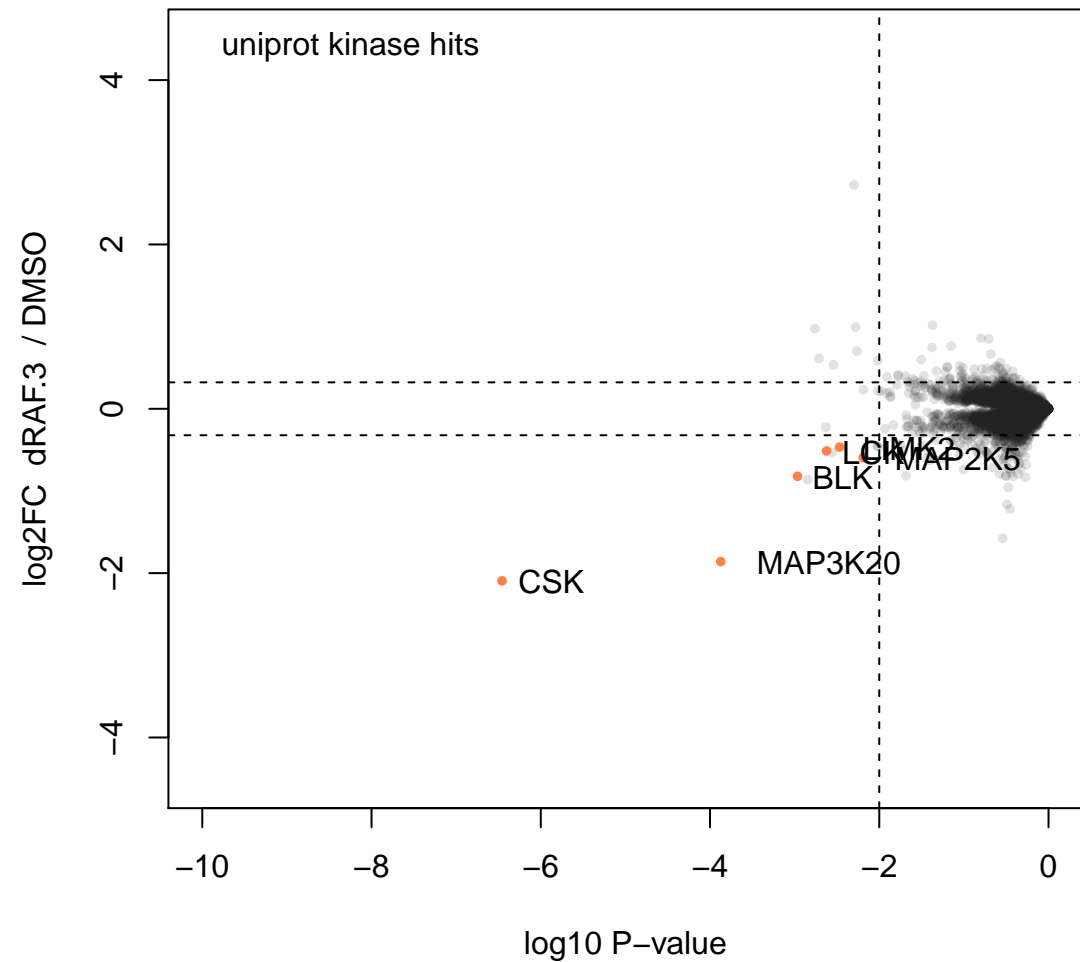



dFLT.2 (wp075)

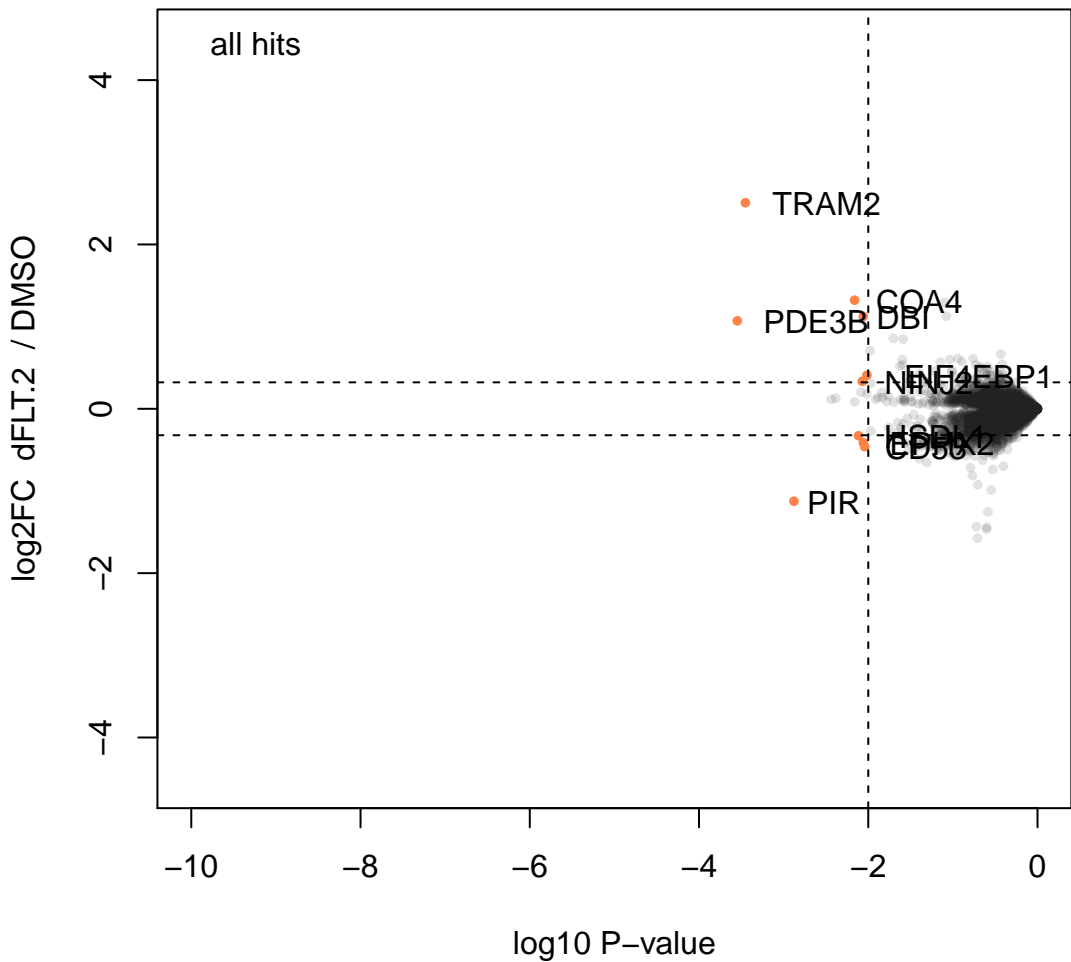

dFLT.2 (wp075)

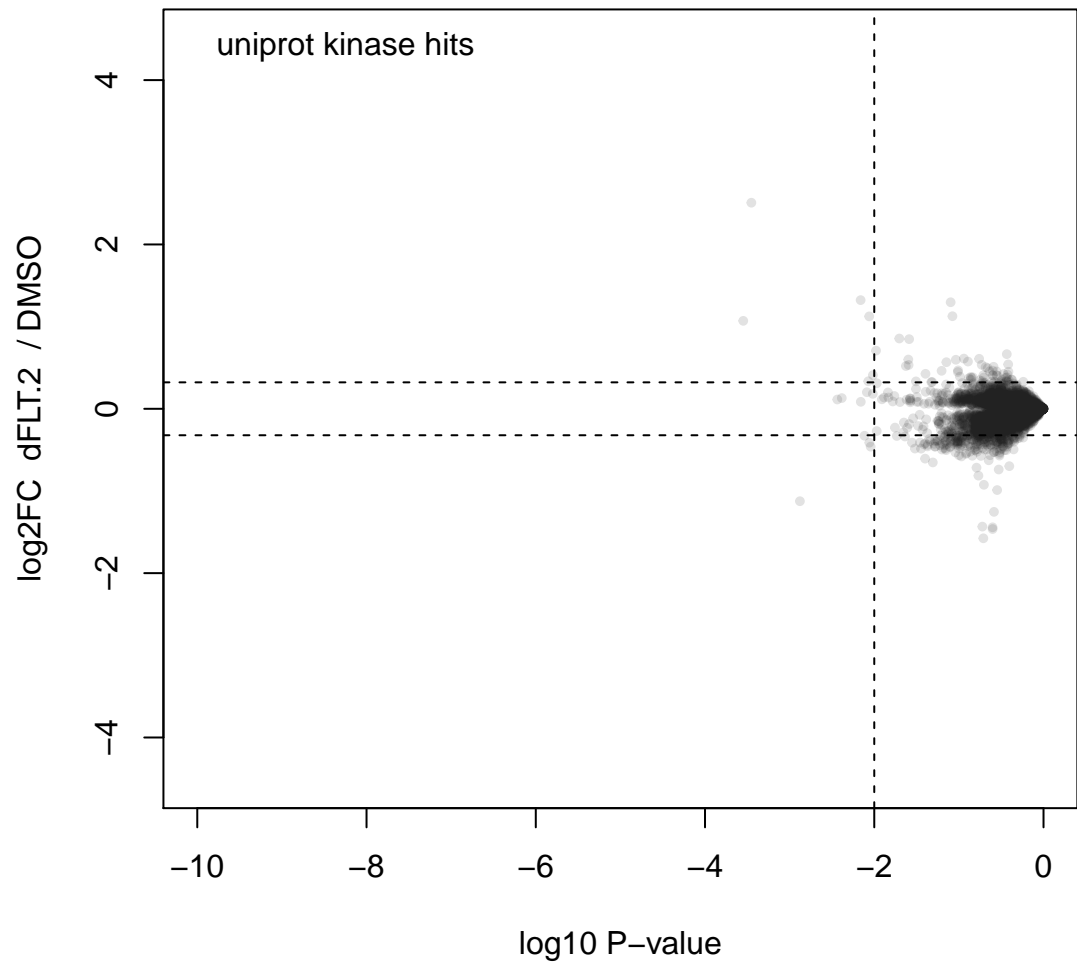

FMF.02.153.1 (wp075)

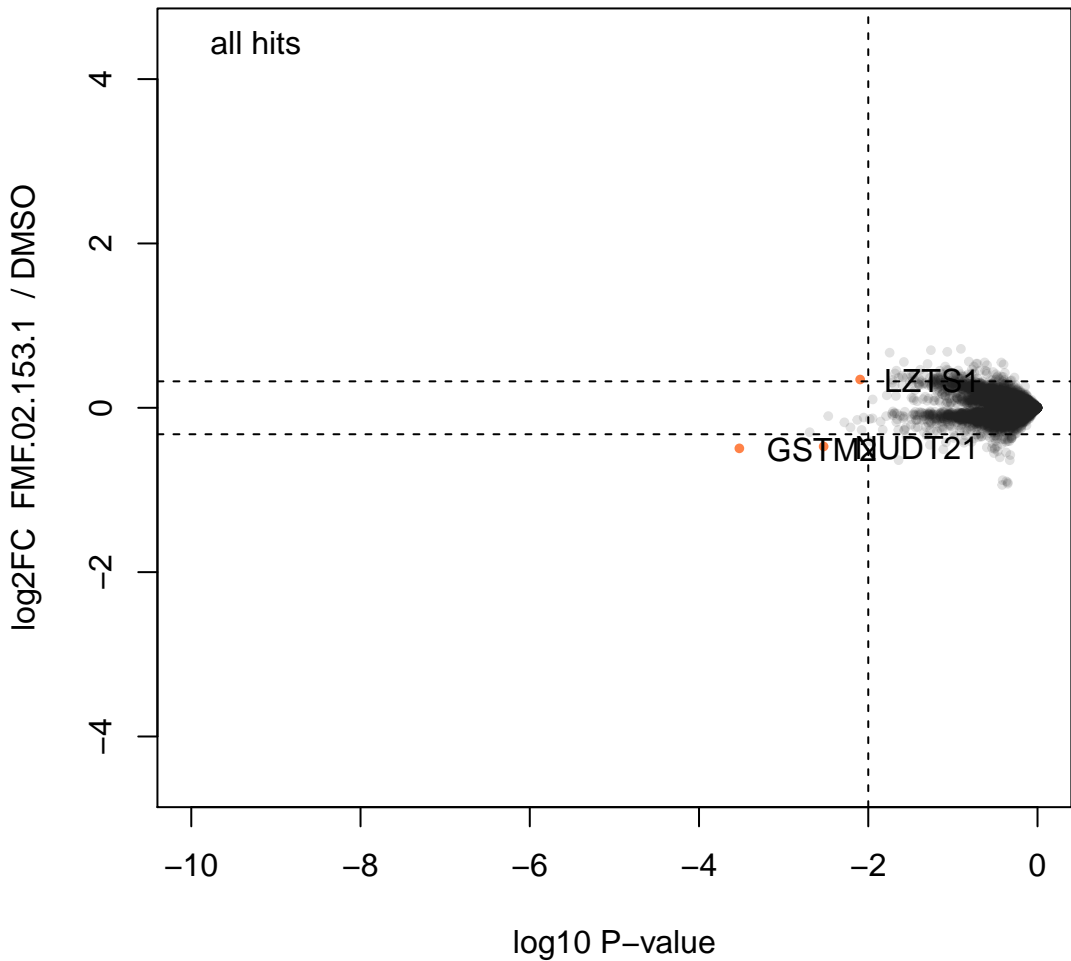

FMF.02.153.1 (wp075)

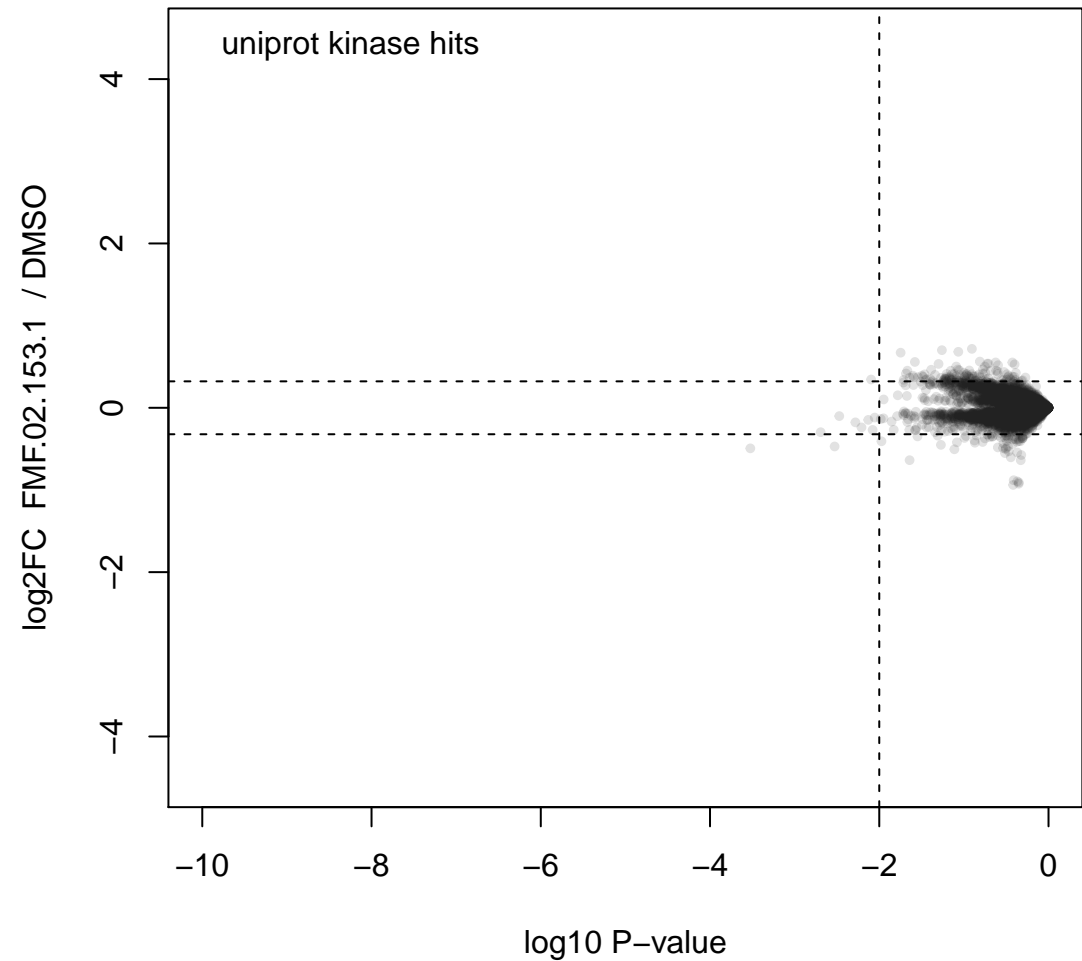



MFH.5.116.1 (wp076)

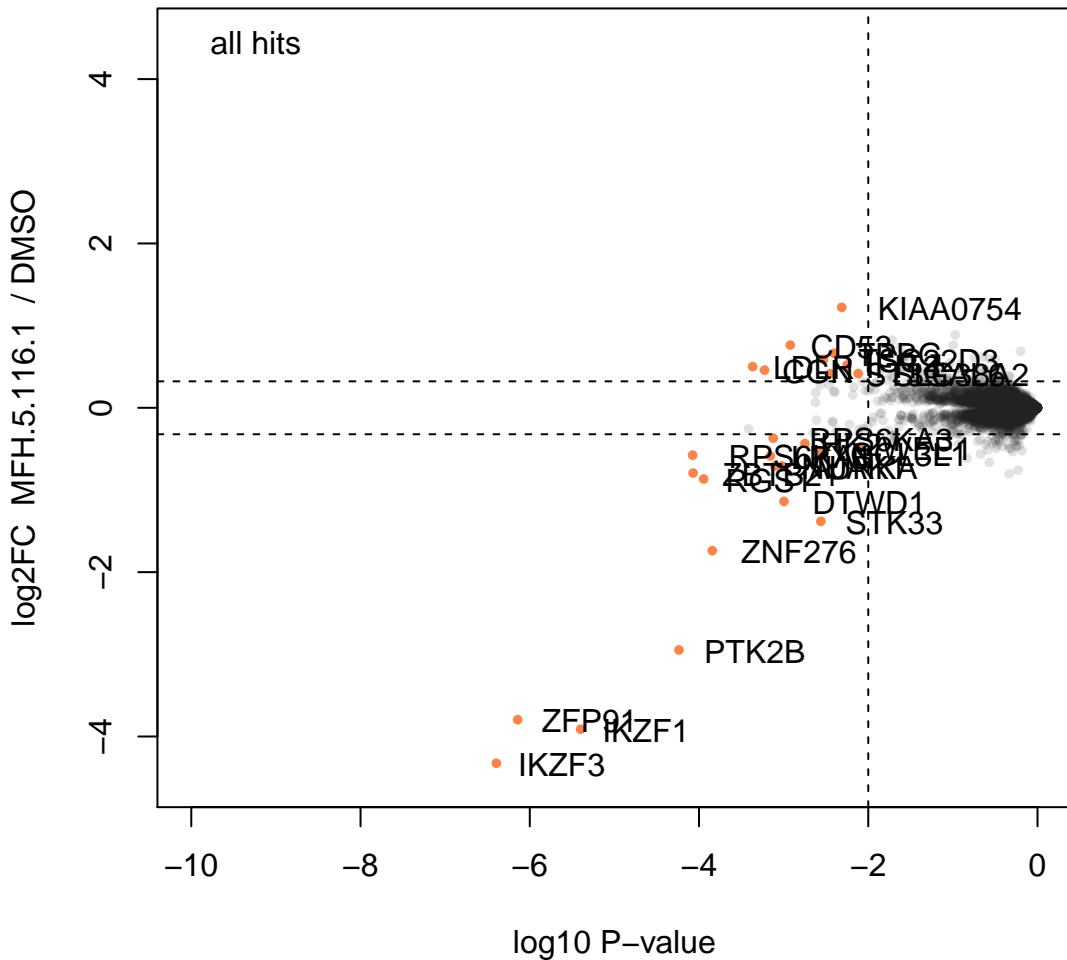

MFH.5.116.1 (wp076)

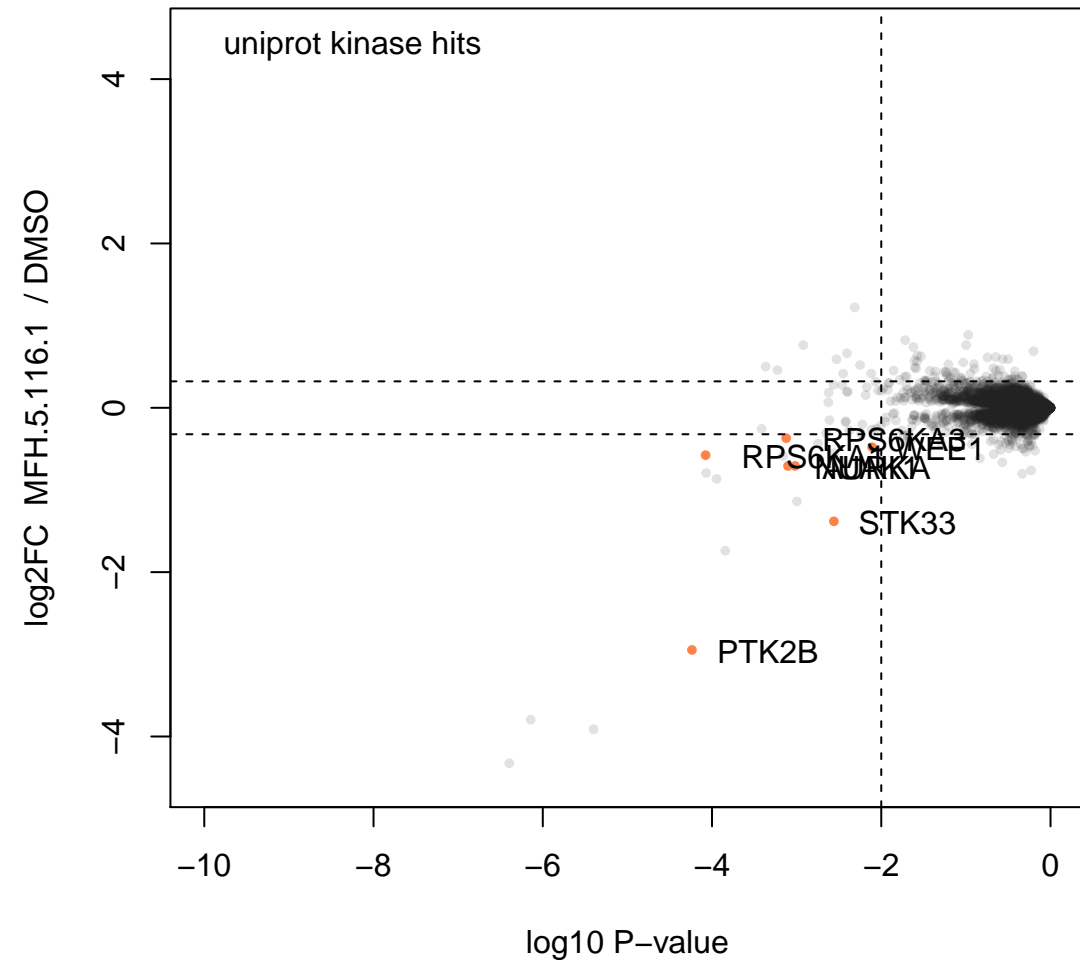

MFH.5.115.2 (wp076)

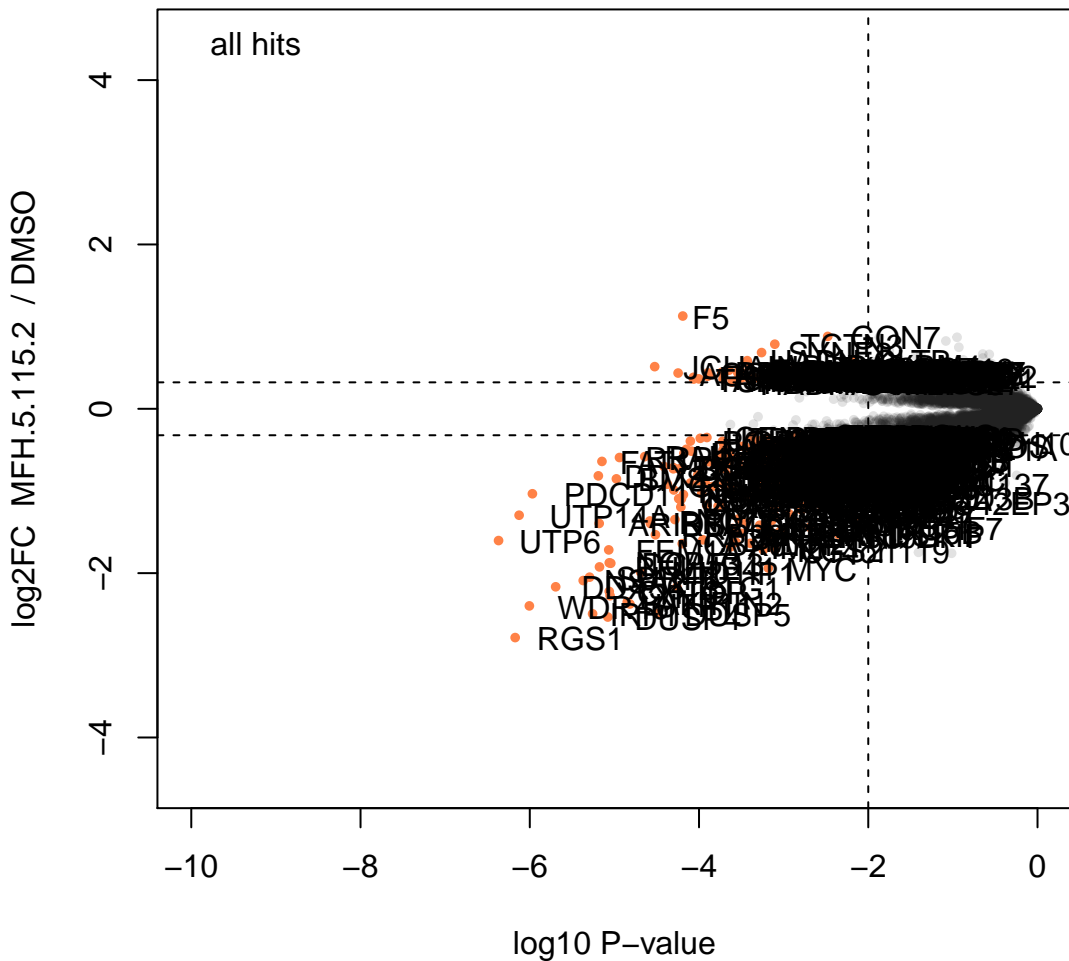

MFH.5.115.2 (wp076)

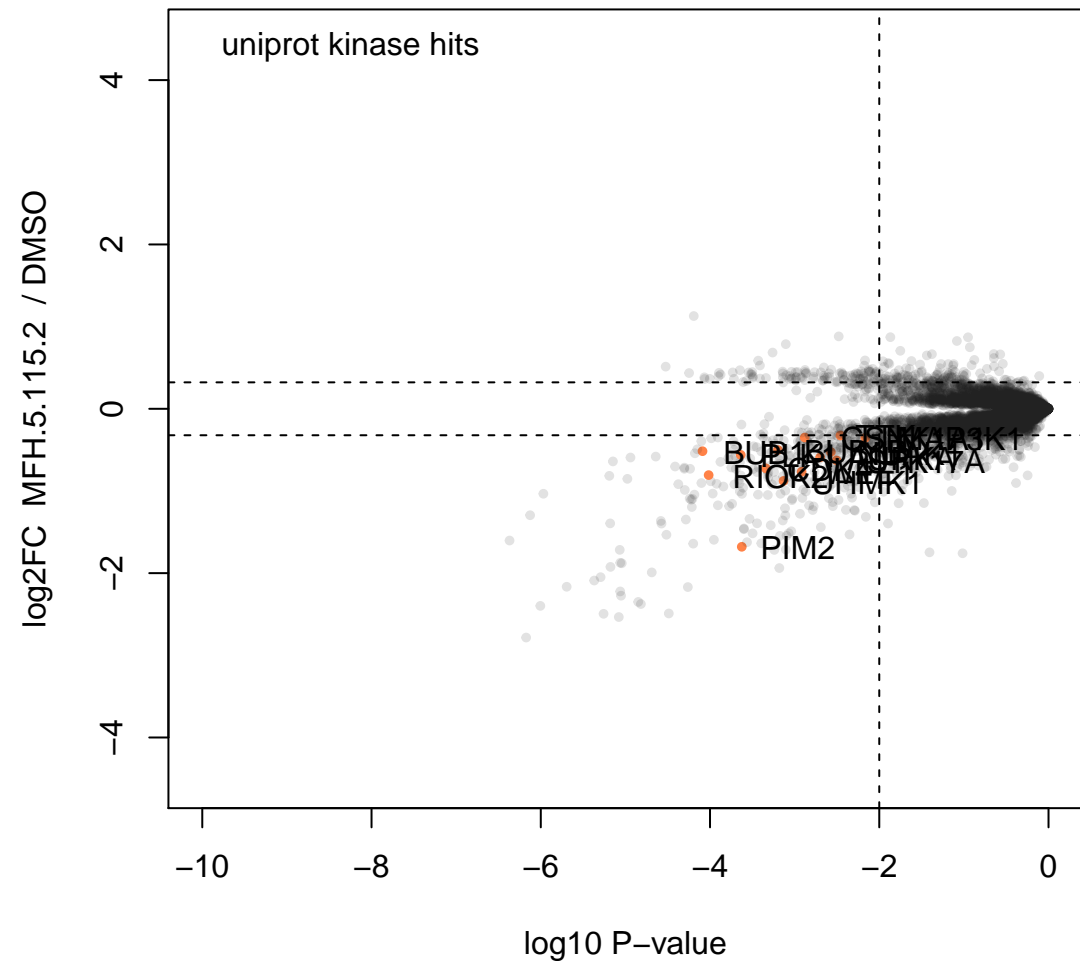

MFH.5.103.1 (wp076)

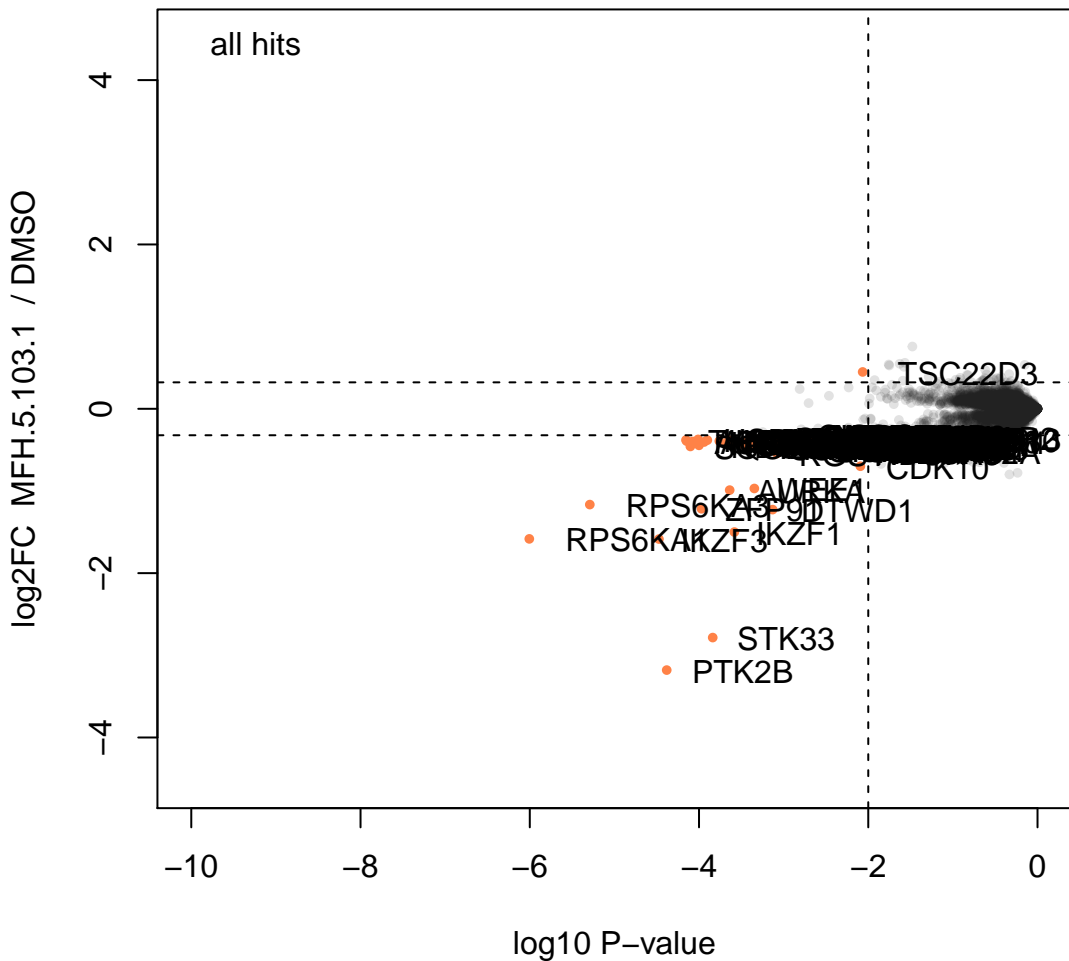

MFH.5.103.1 (wp076)

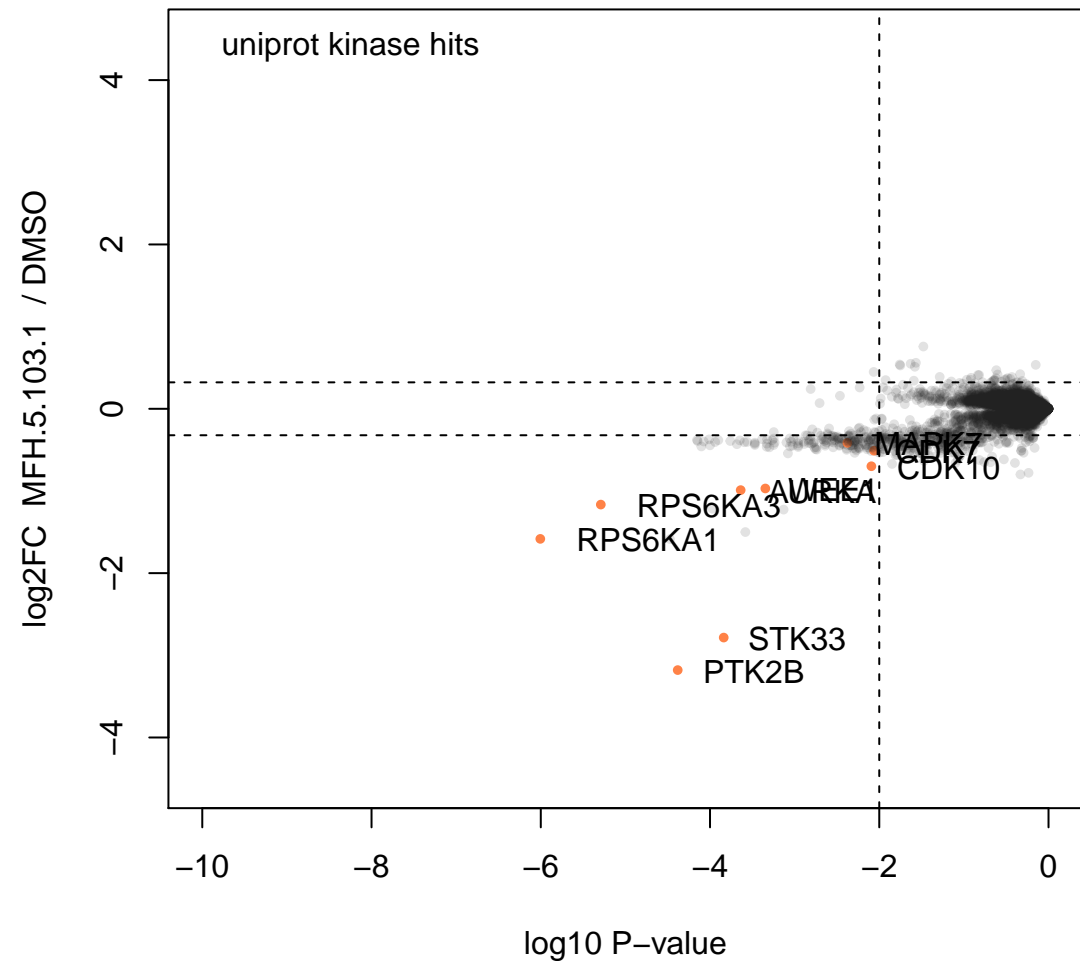

RSS0680 (wp080)

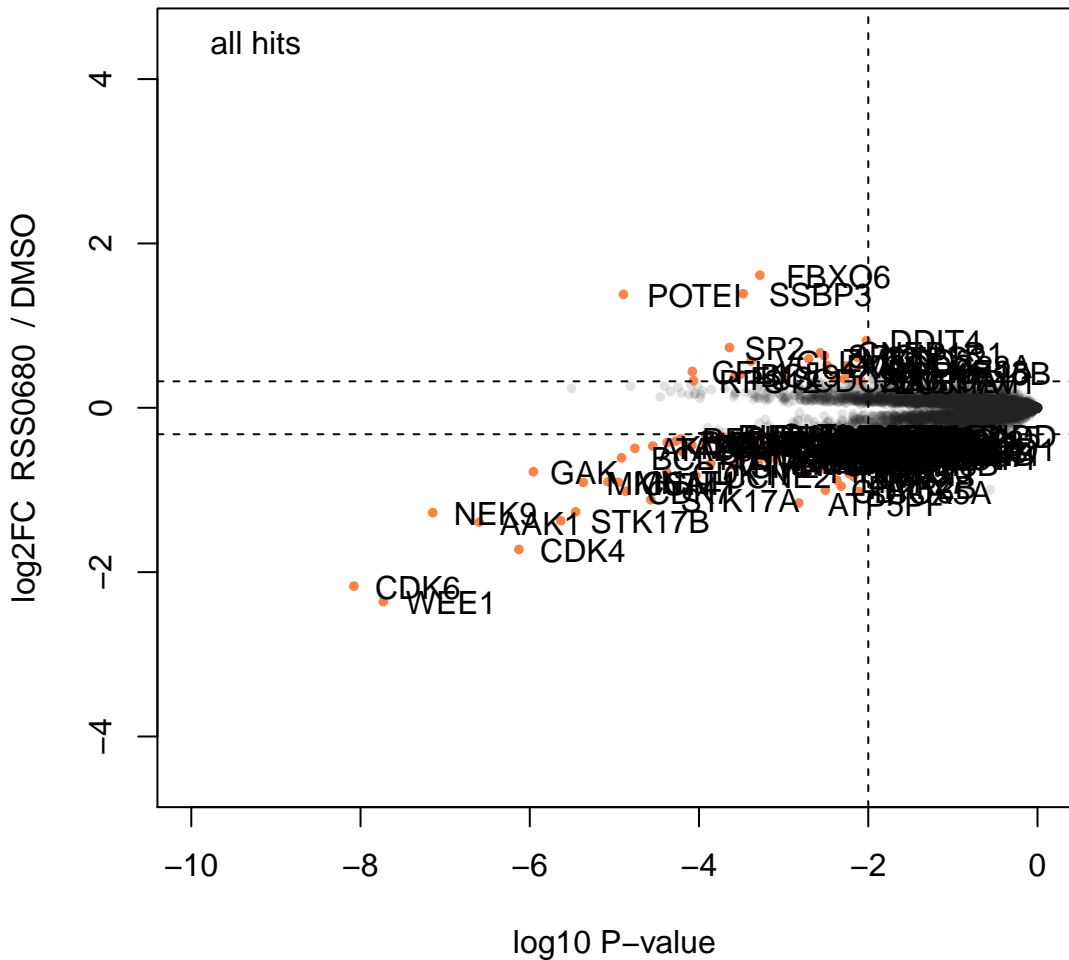

RSS0680 (wp080)

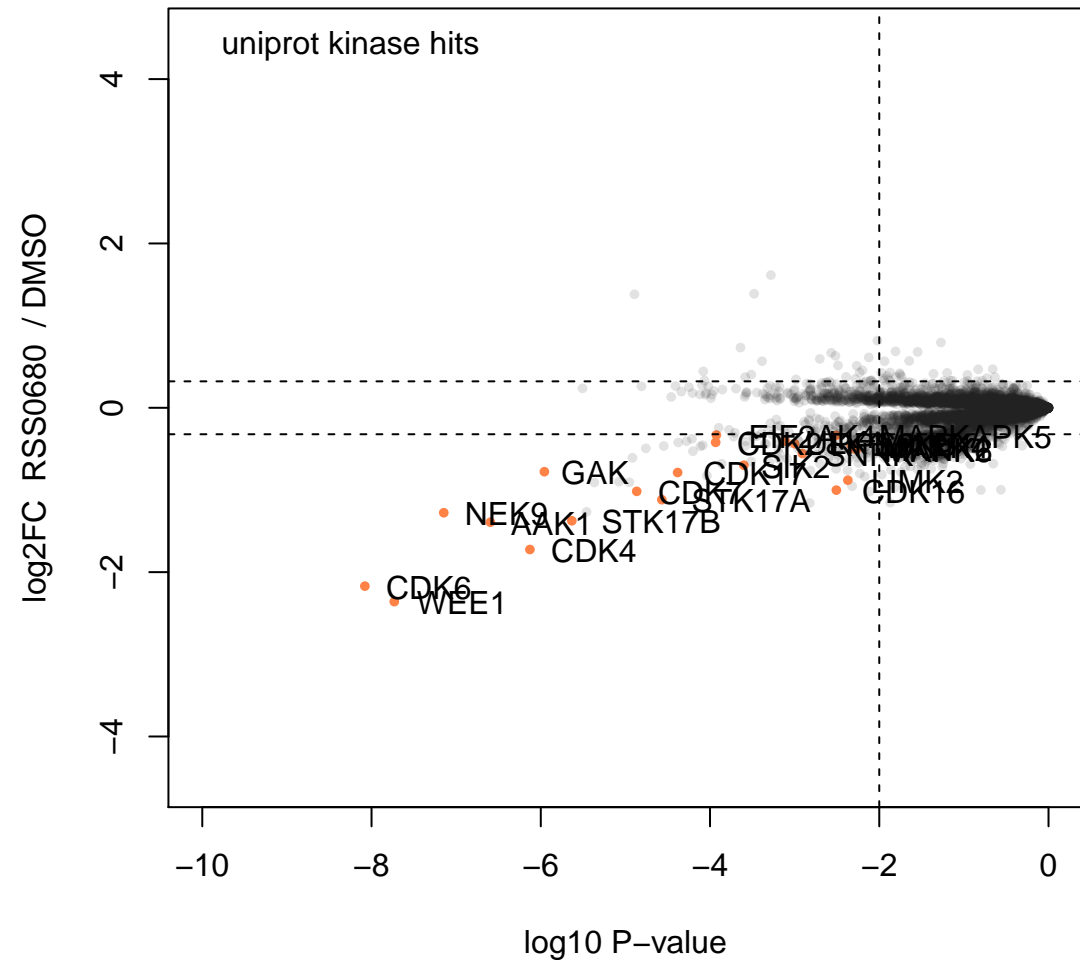

dAURK.4 (wp080)

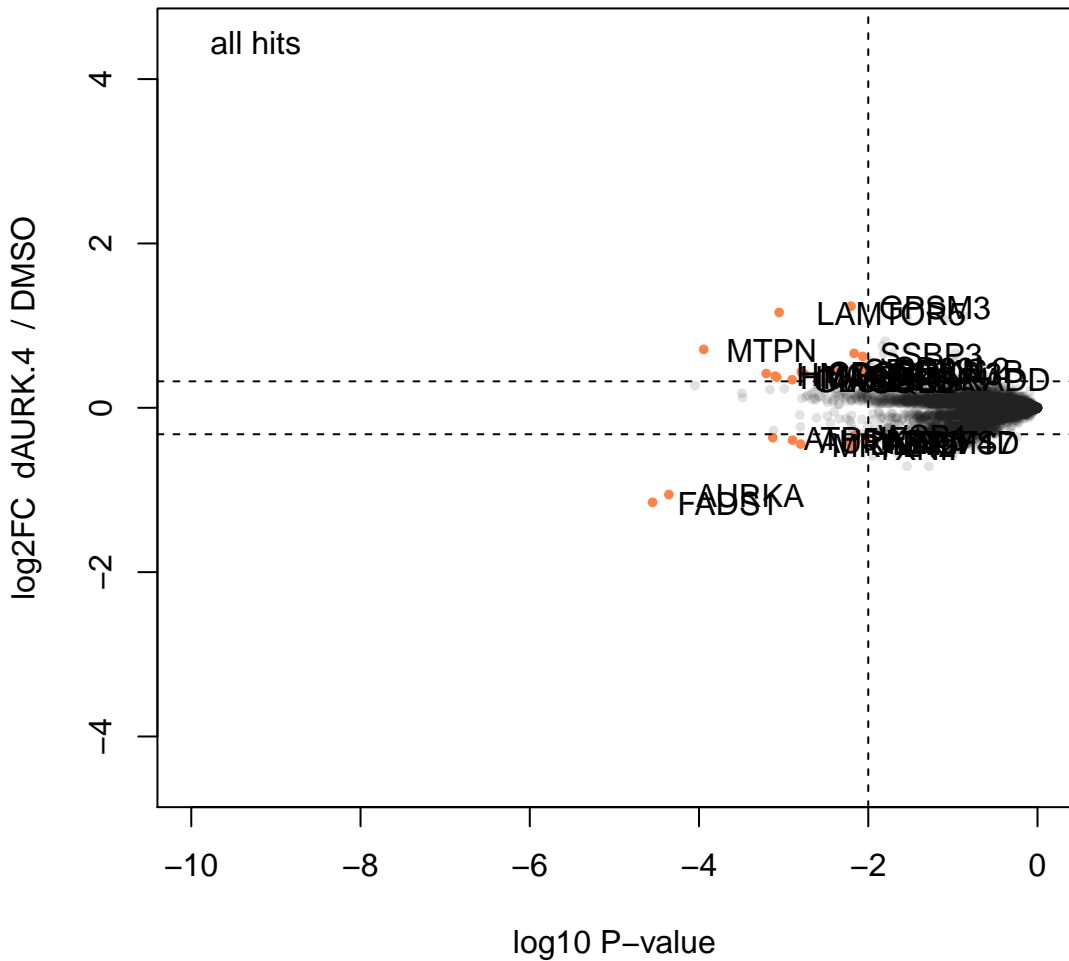

dAURK.4 (wp080)

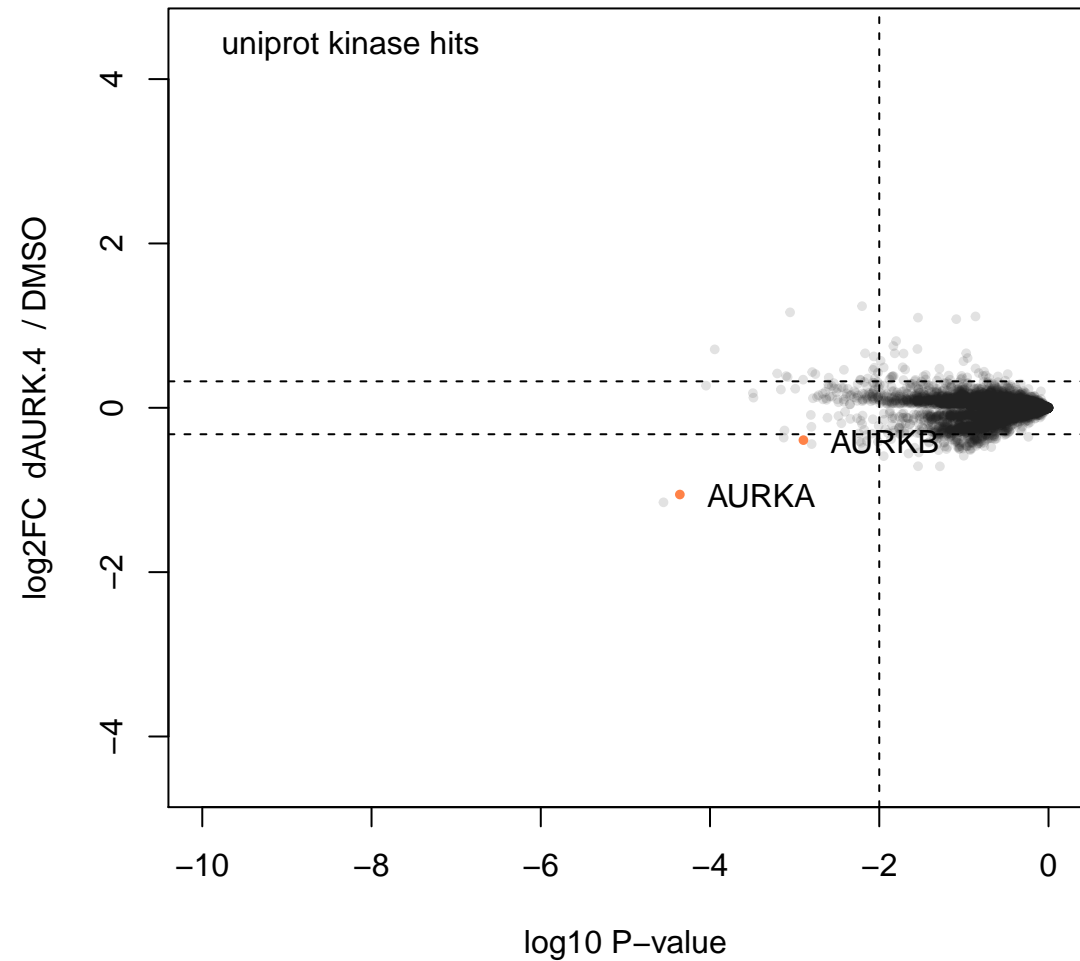



dAbl.2 (wp080)

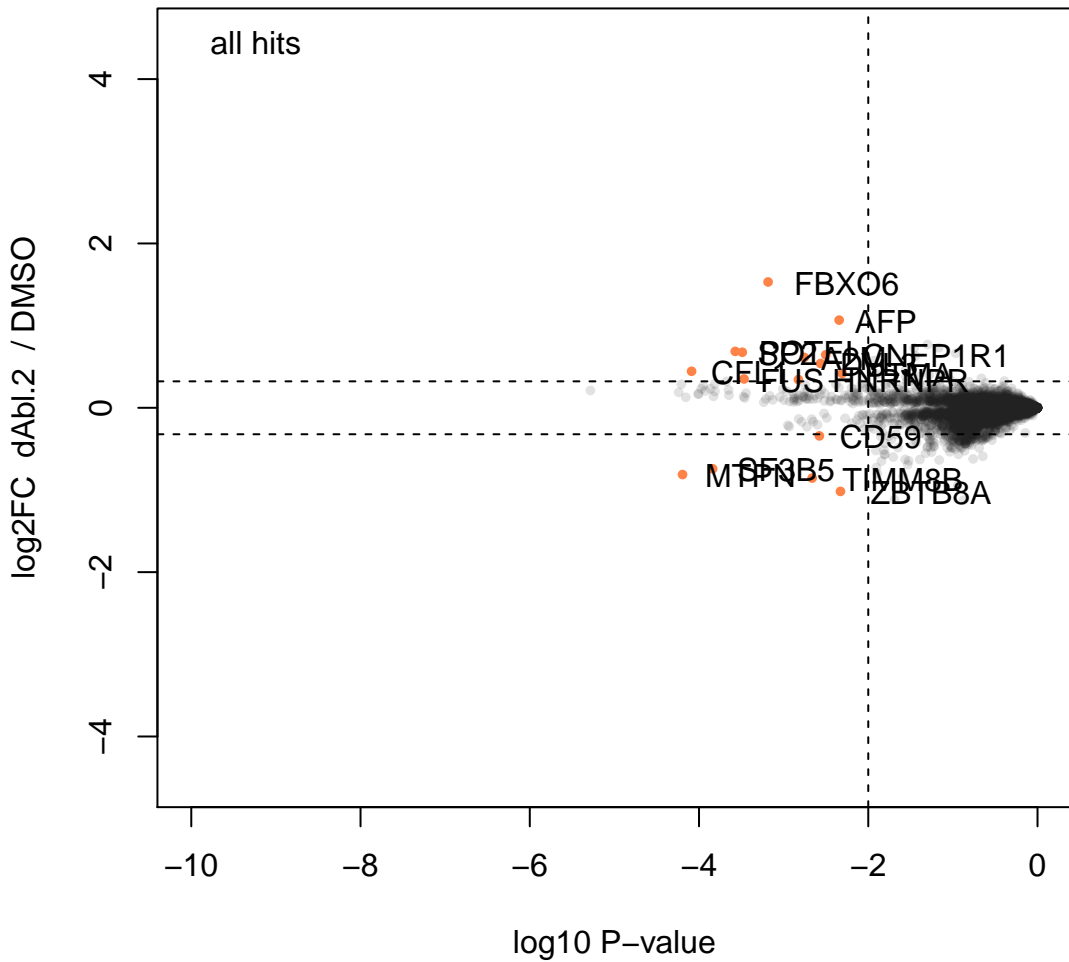

dAbl.2 (wp080)

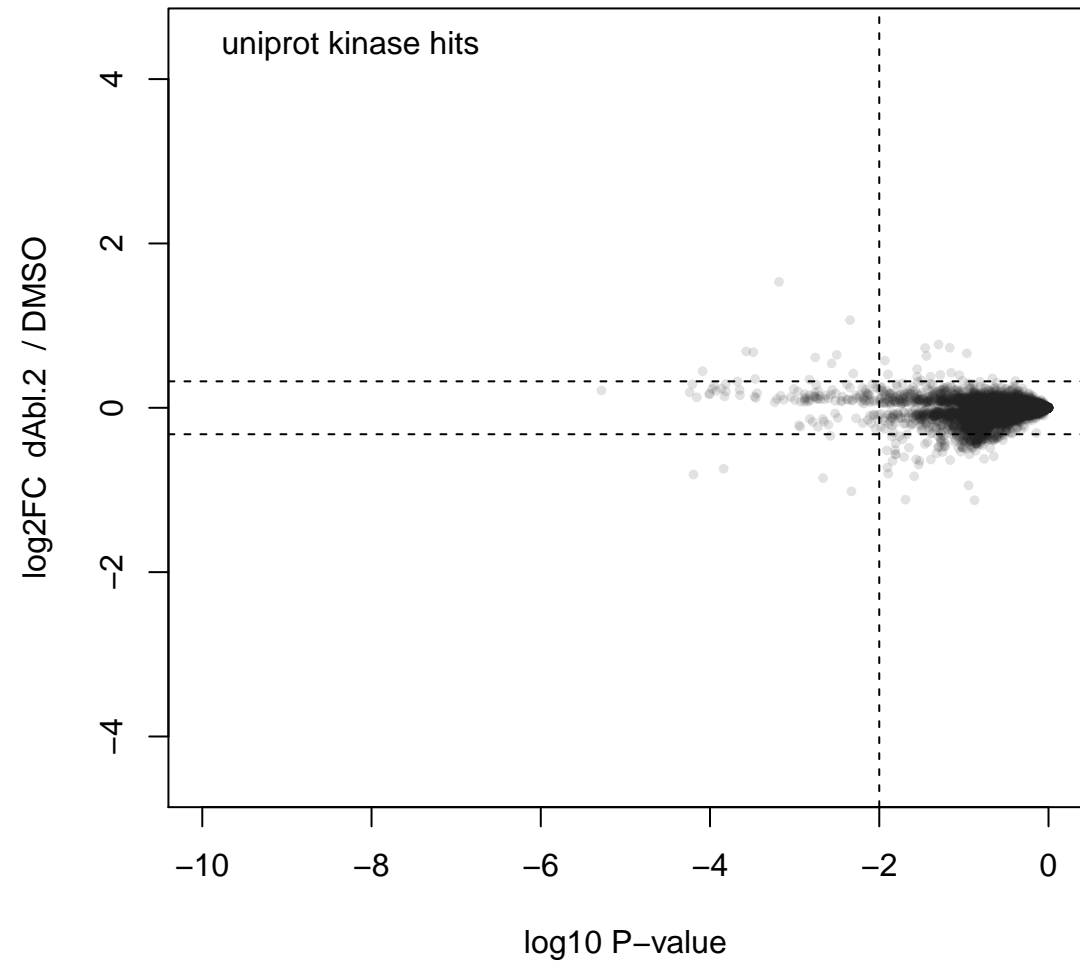

TL13.178 (wp081)

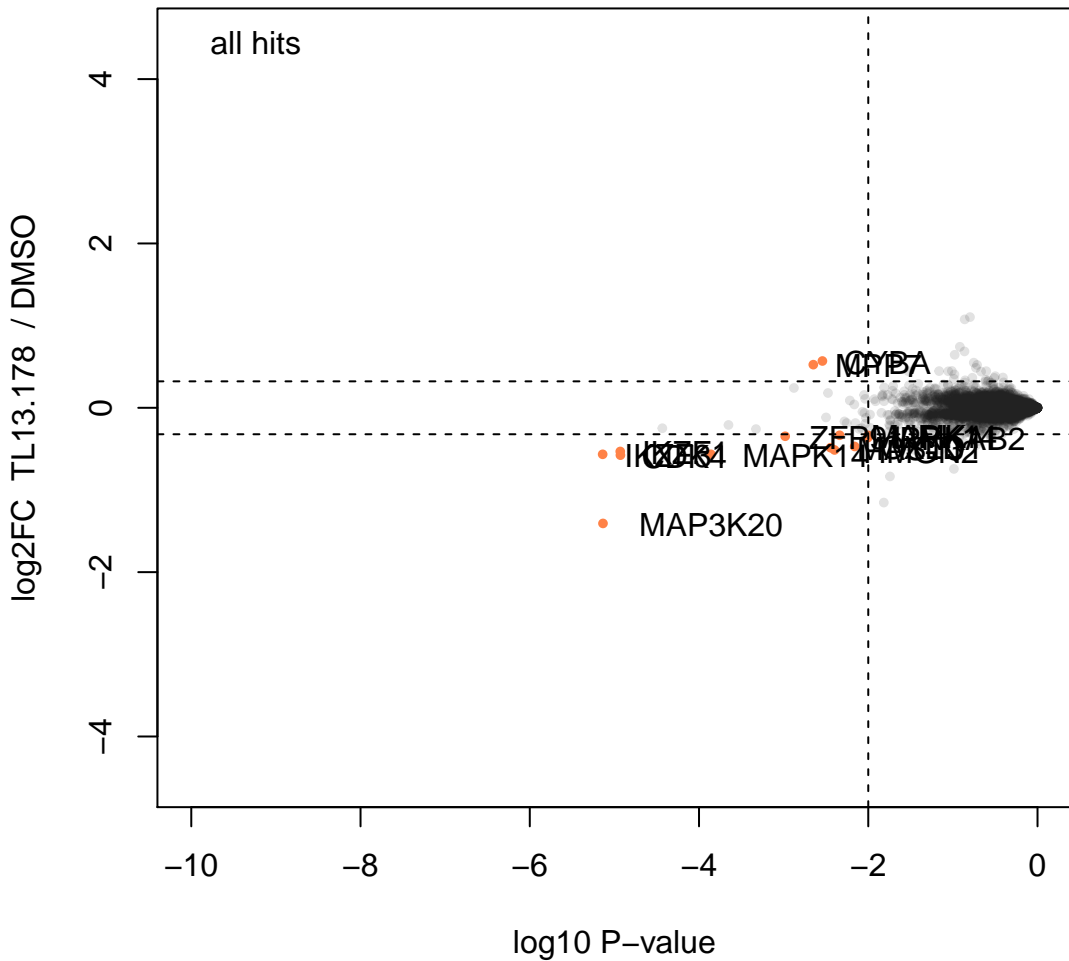

TL13.178 (wp081)

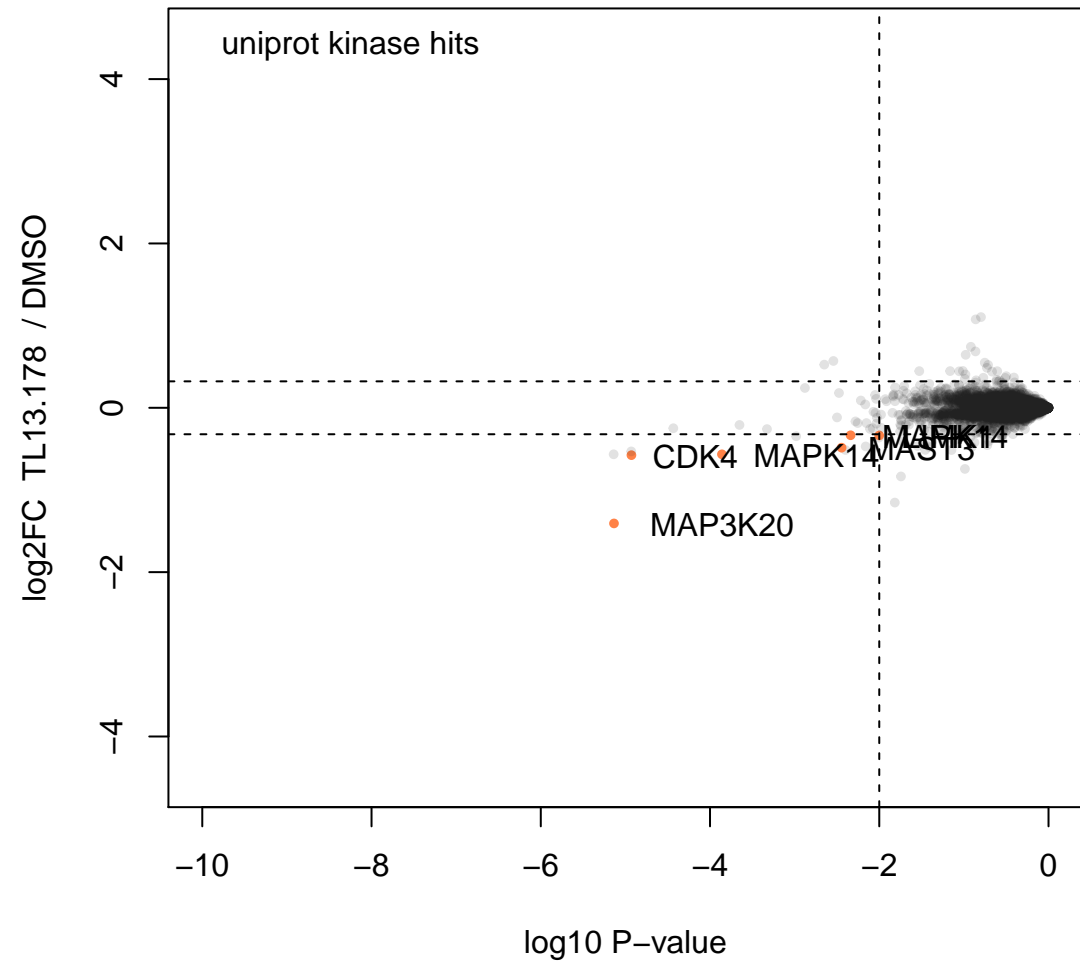

INY.01.140.1 (wp081)

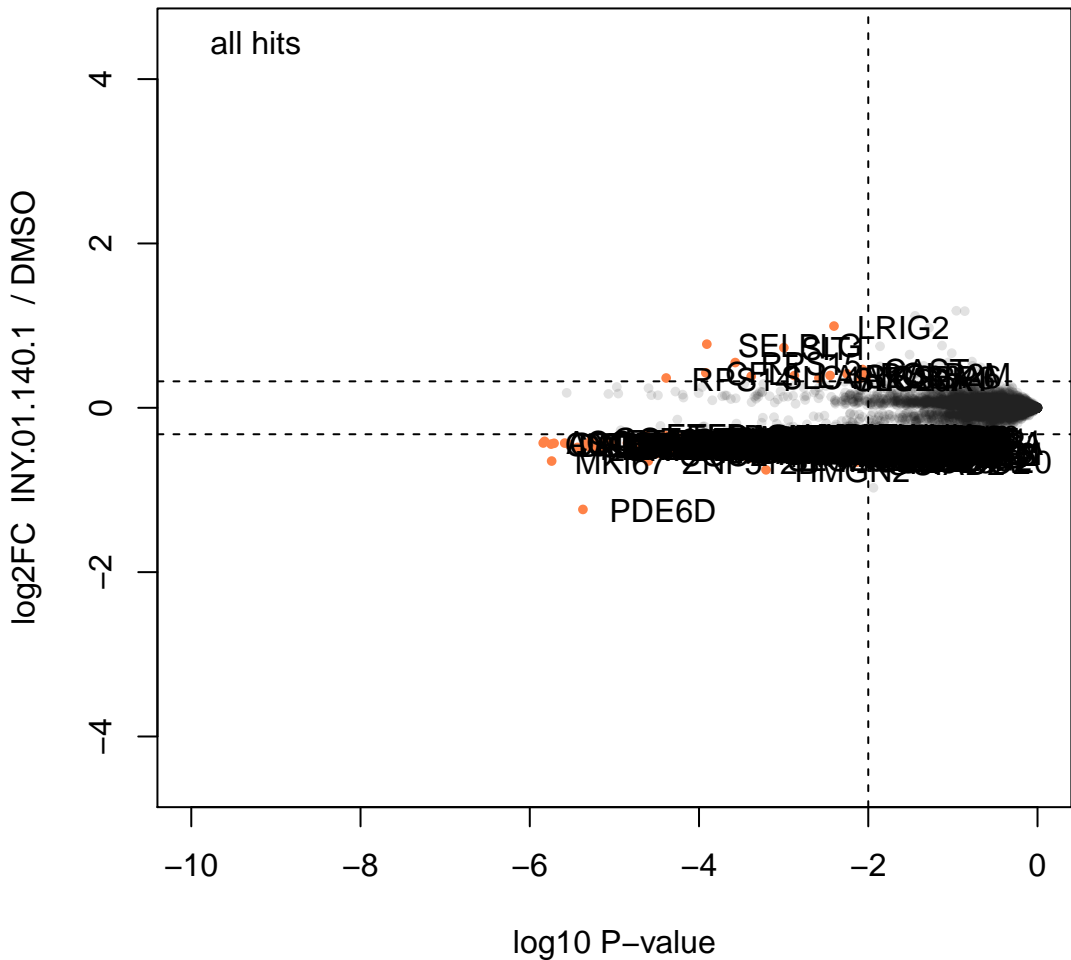

INY.01.140.1 (wp081)

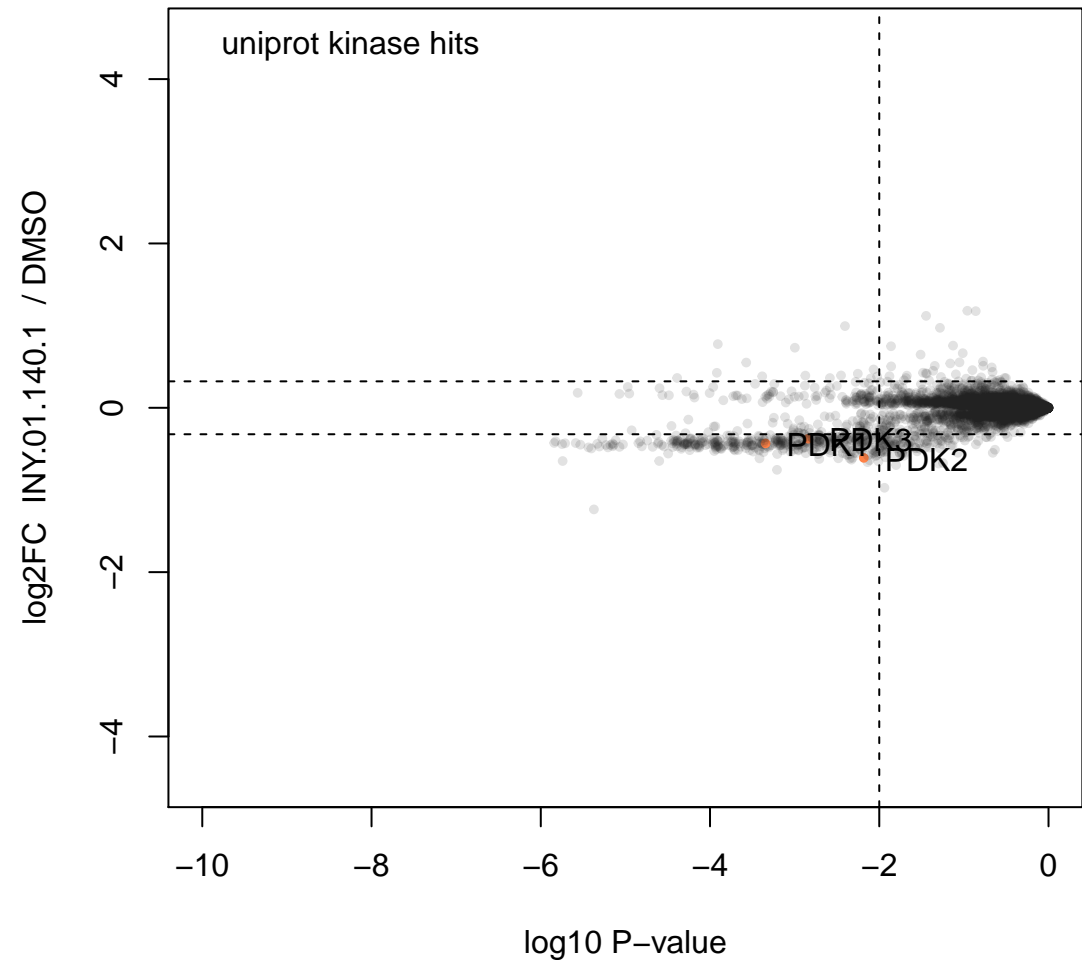

TL13.150 (wp081)

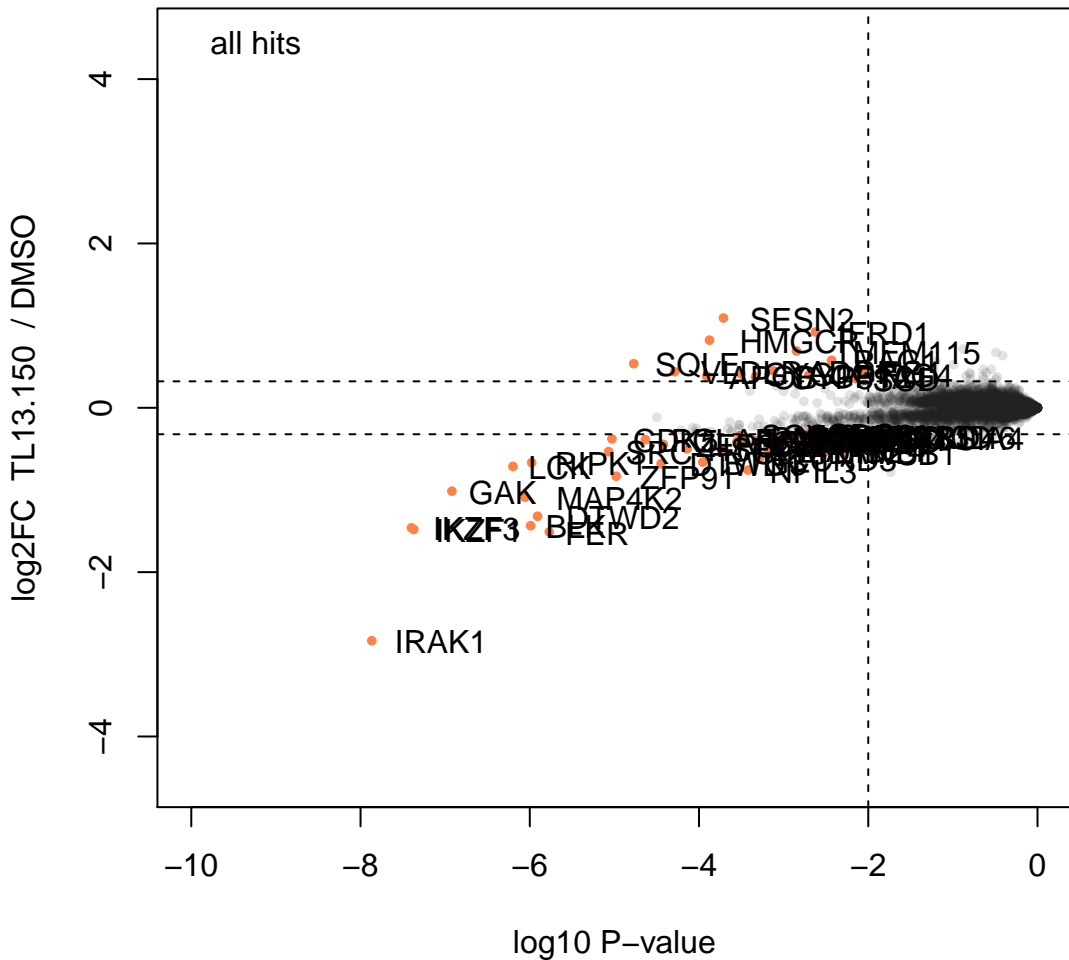

TL13.150 (wp081)

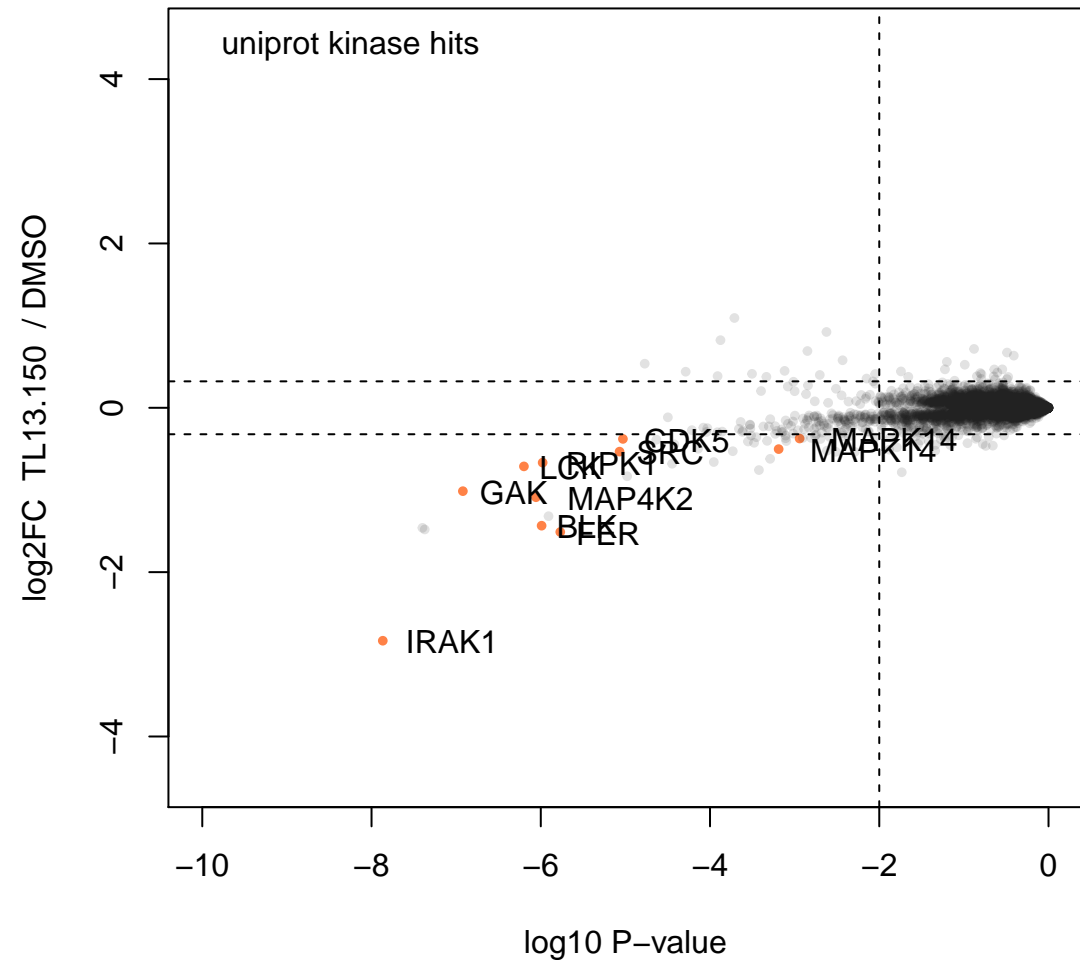

ZNL.02.096 (wp081)

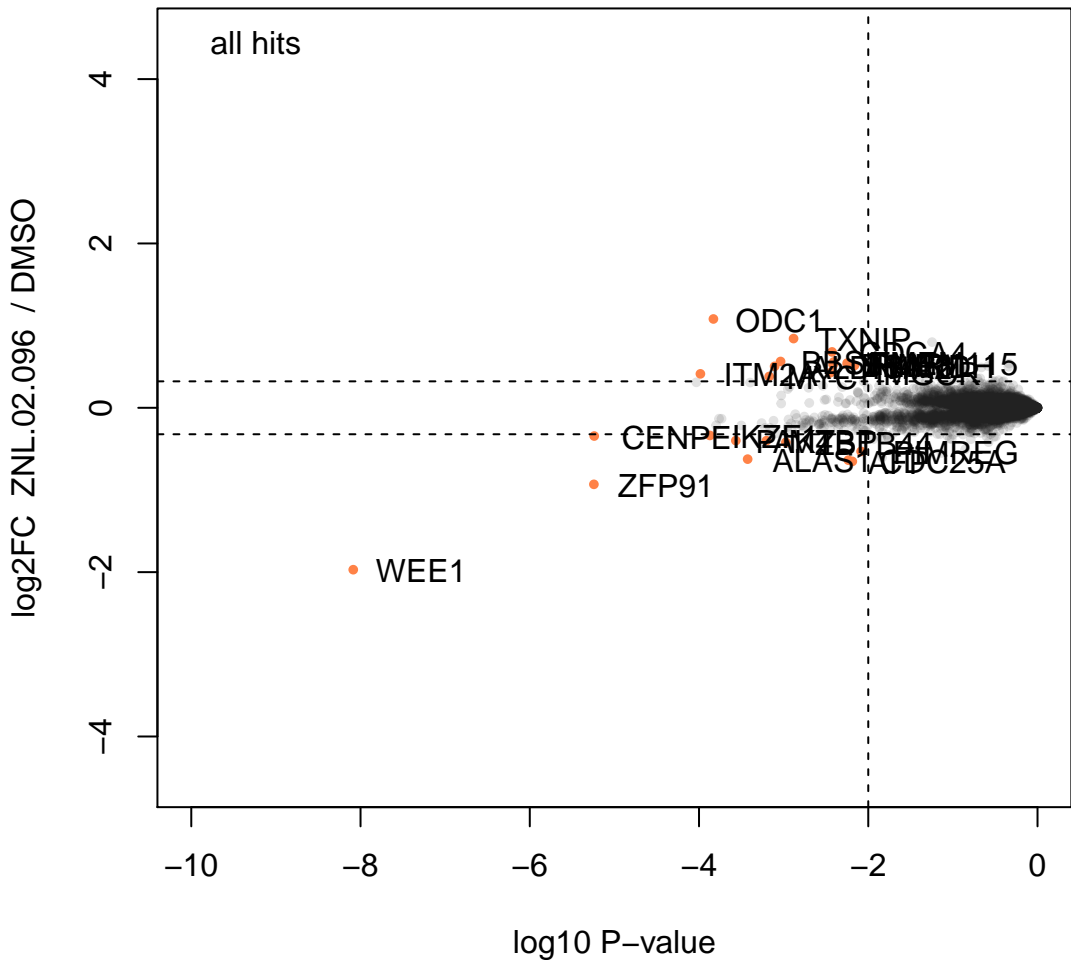

ZNL.02.096 (wp081)

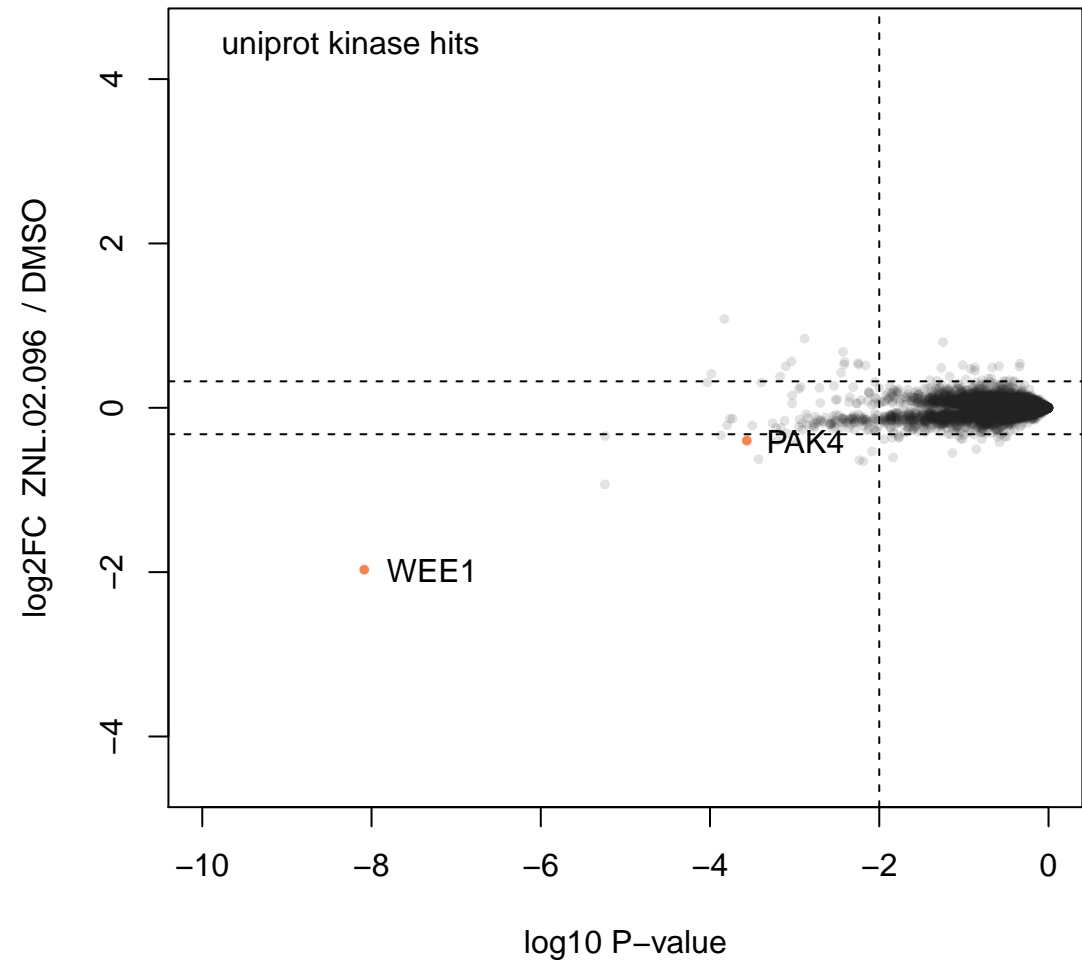

SB1.G.192.1 (wp081)

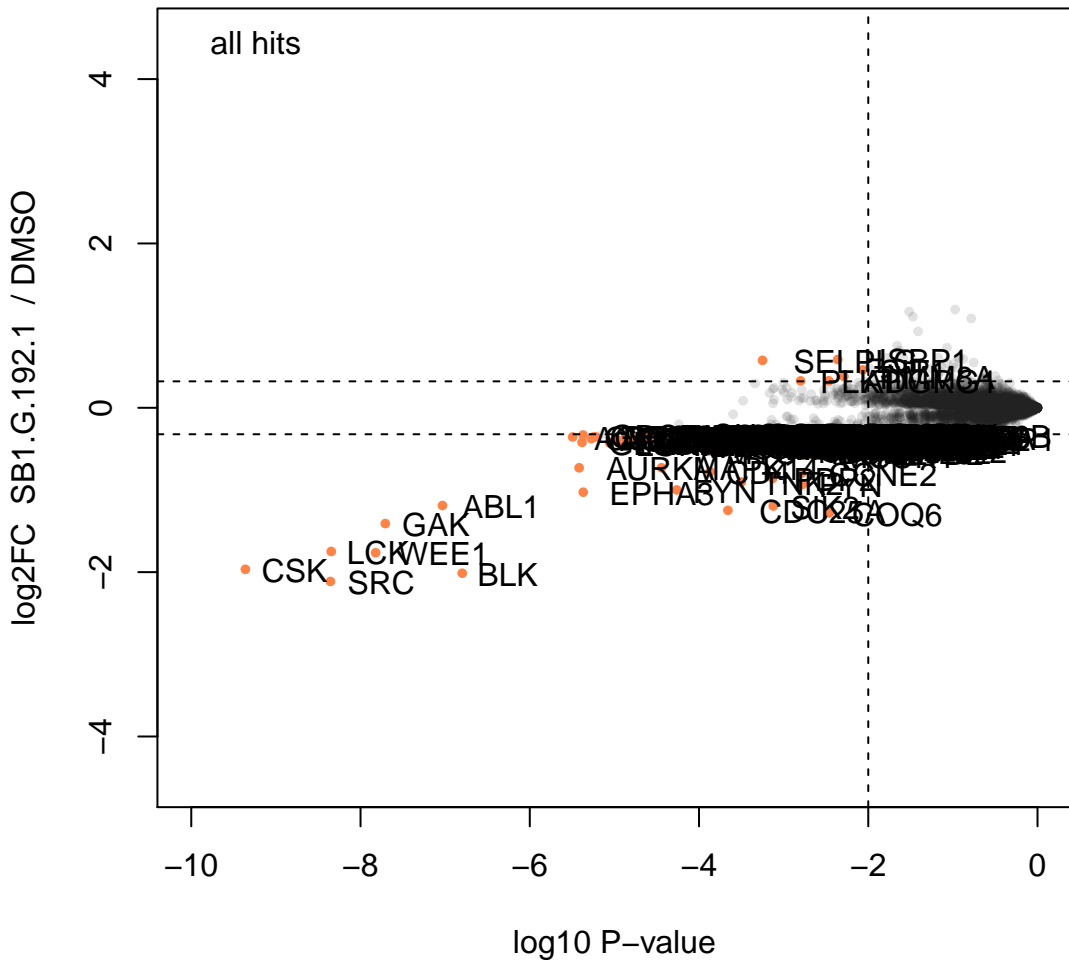

SB1.G.192.1 (wp081)

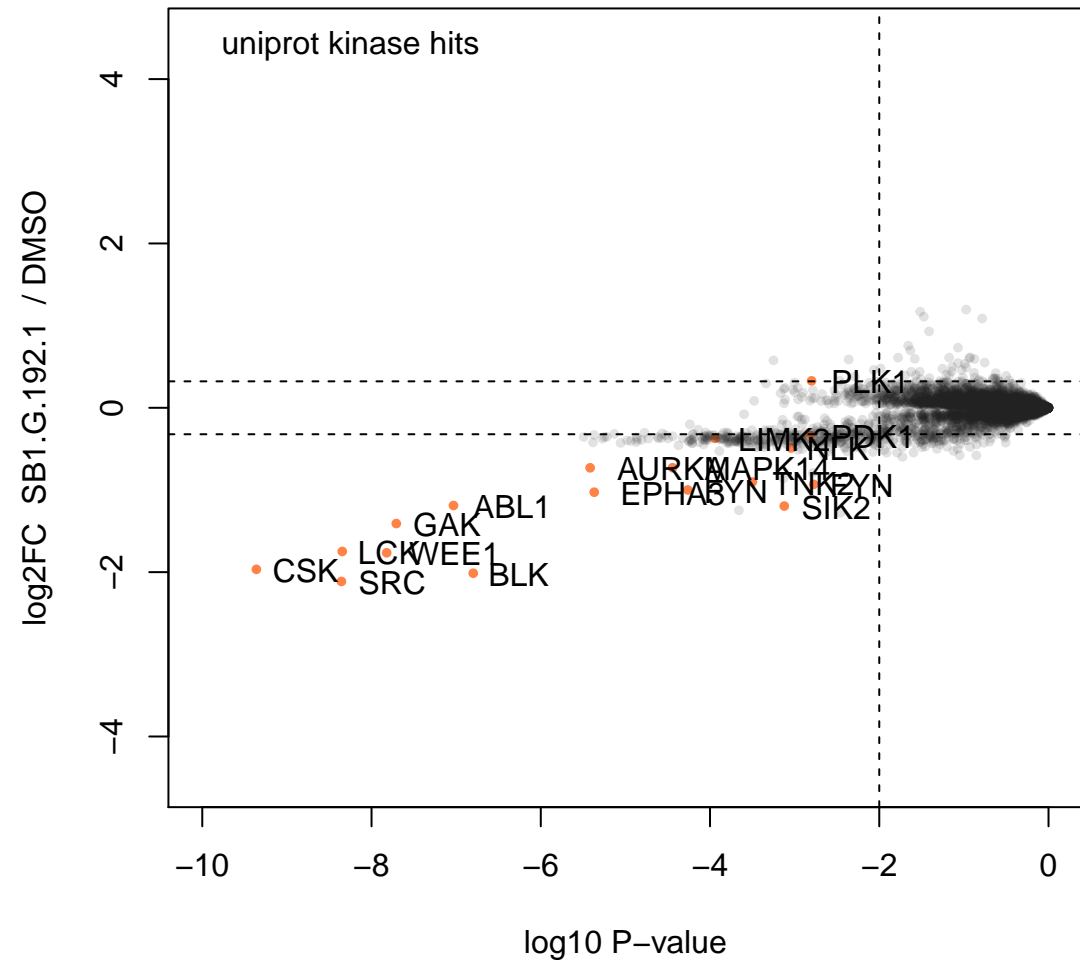

TL13.117 (wp081)

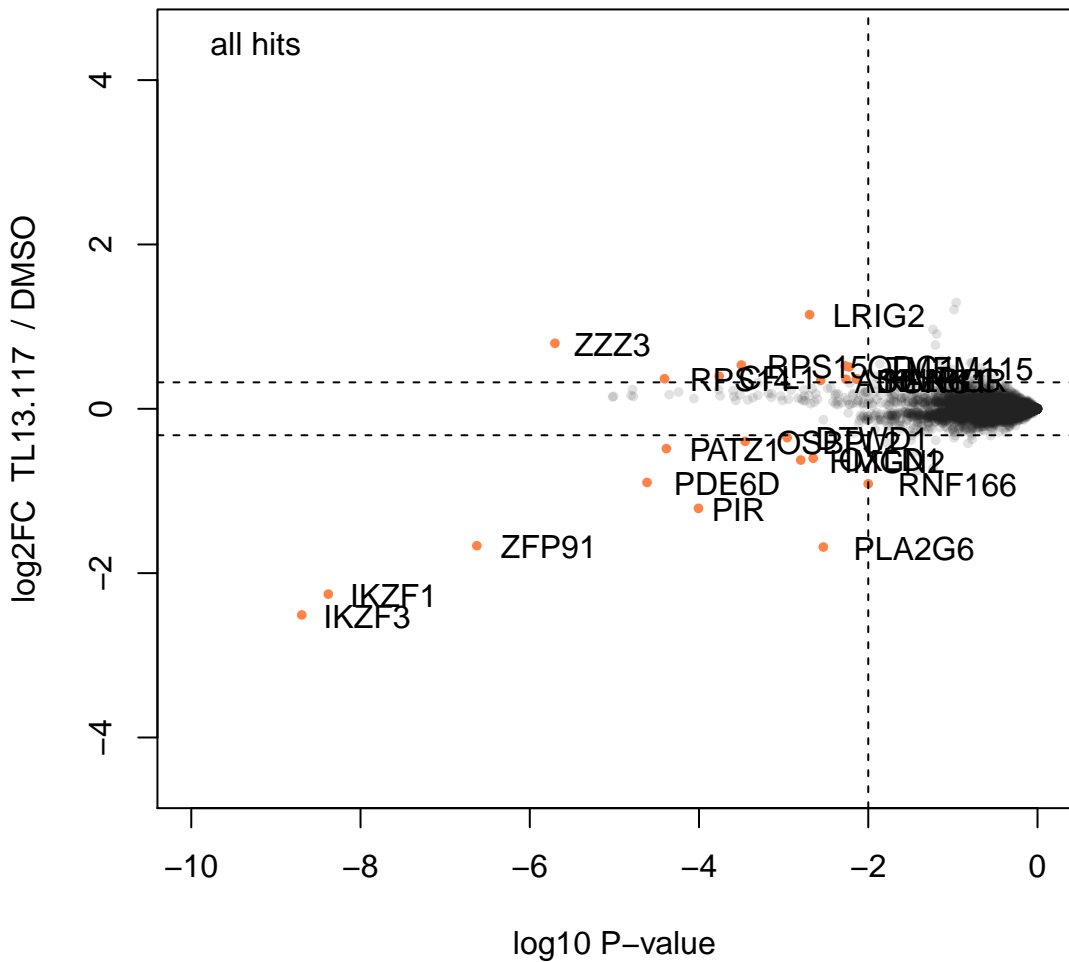

TL13.117 (wp081)

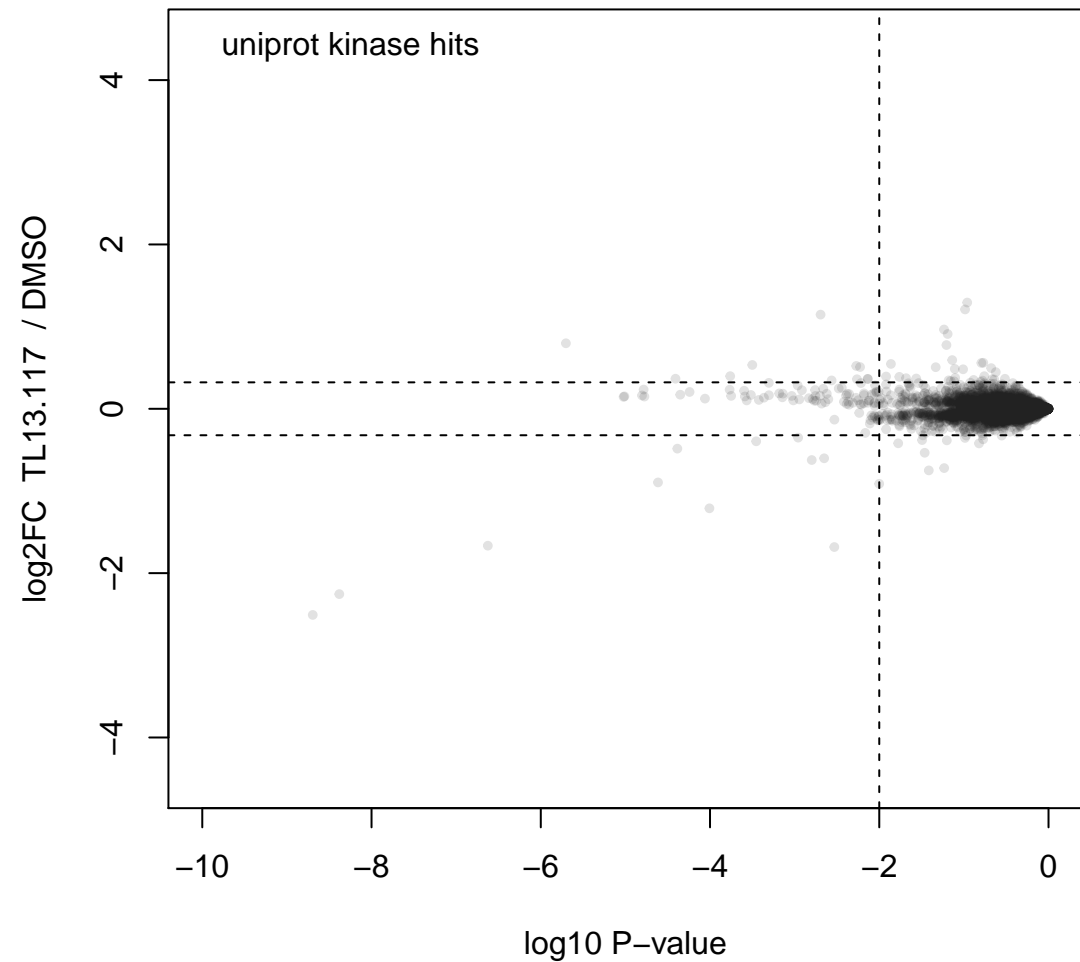

BSJ.01.147 (wp084)

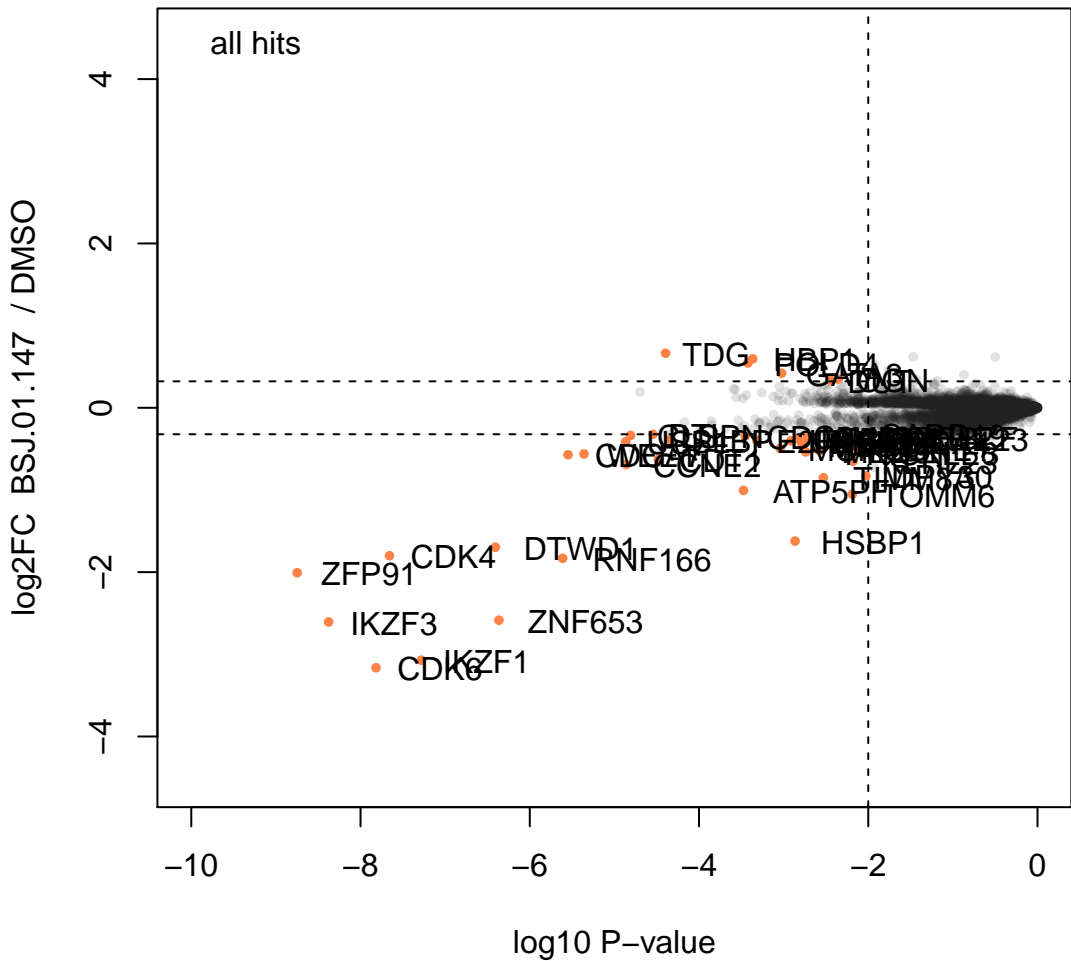

BSJ.01.147 (wp084)

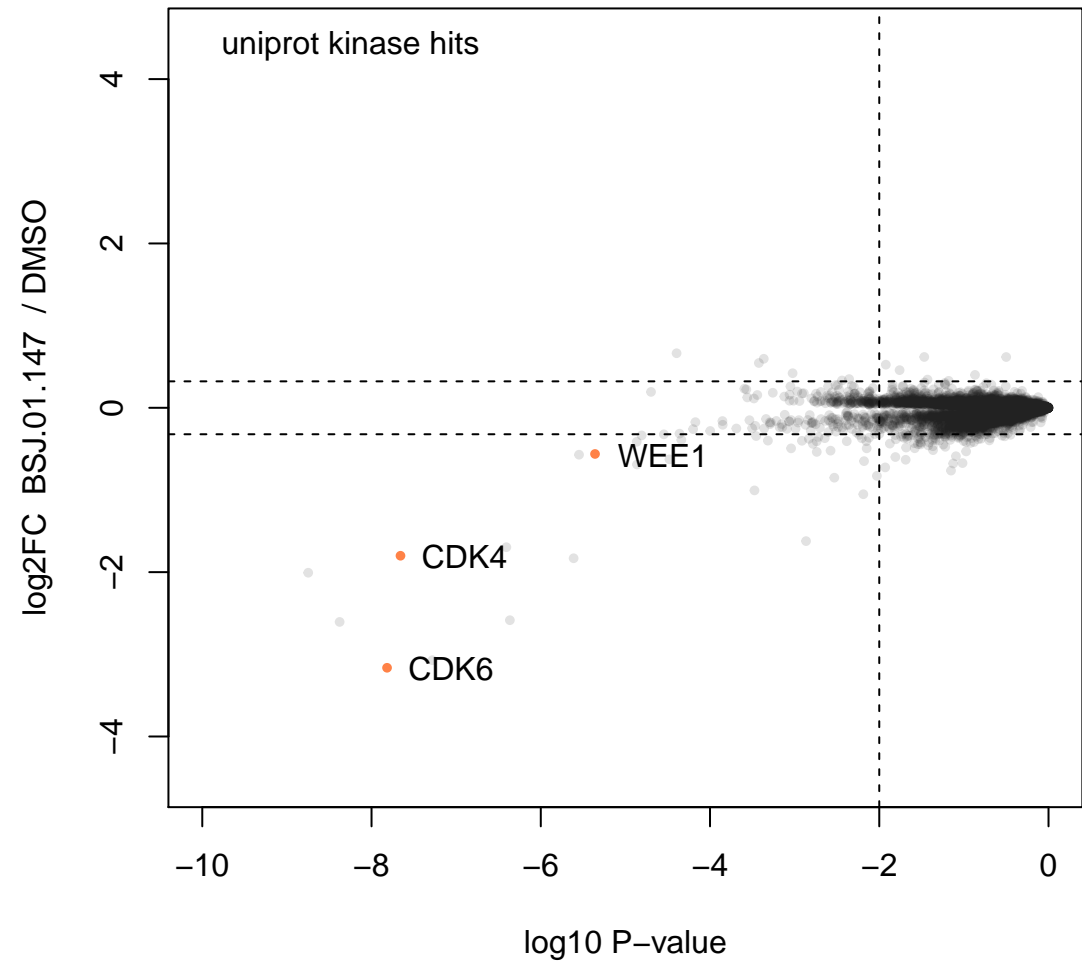



BSJ.04.132 (wp084)

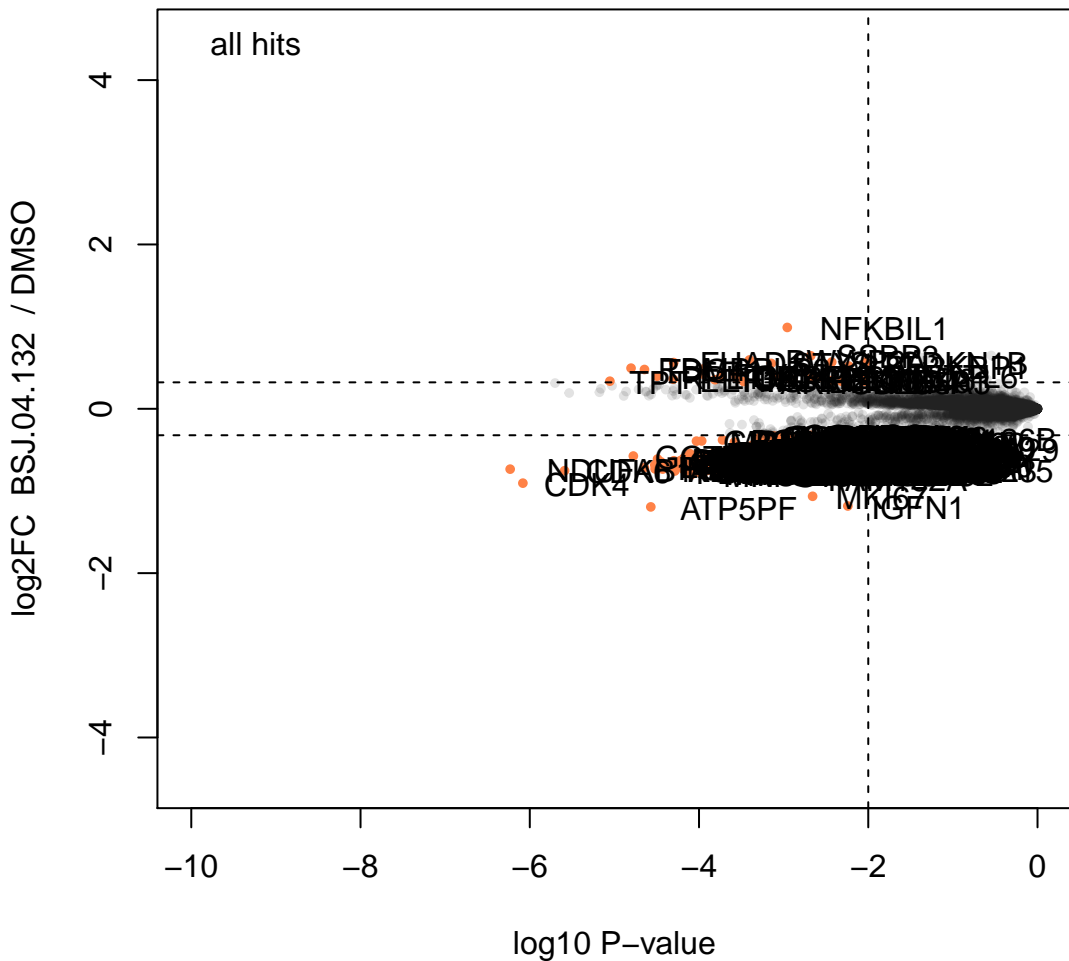

BSJ.04.132 (wp084)

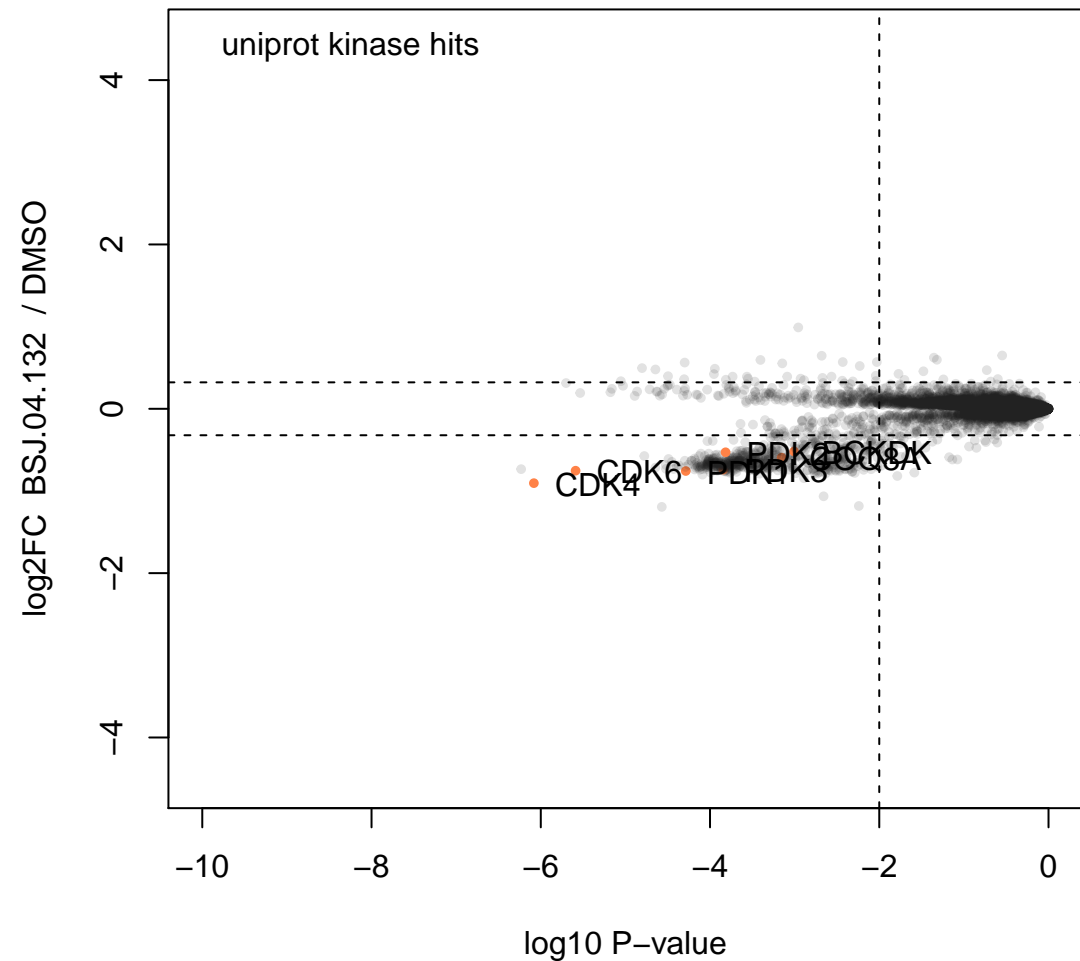

BSJ.03.204 (wp084)

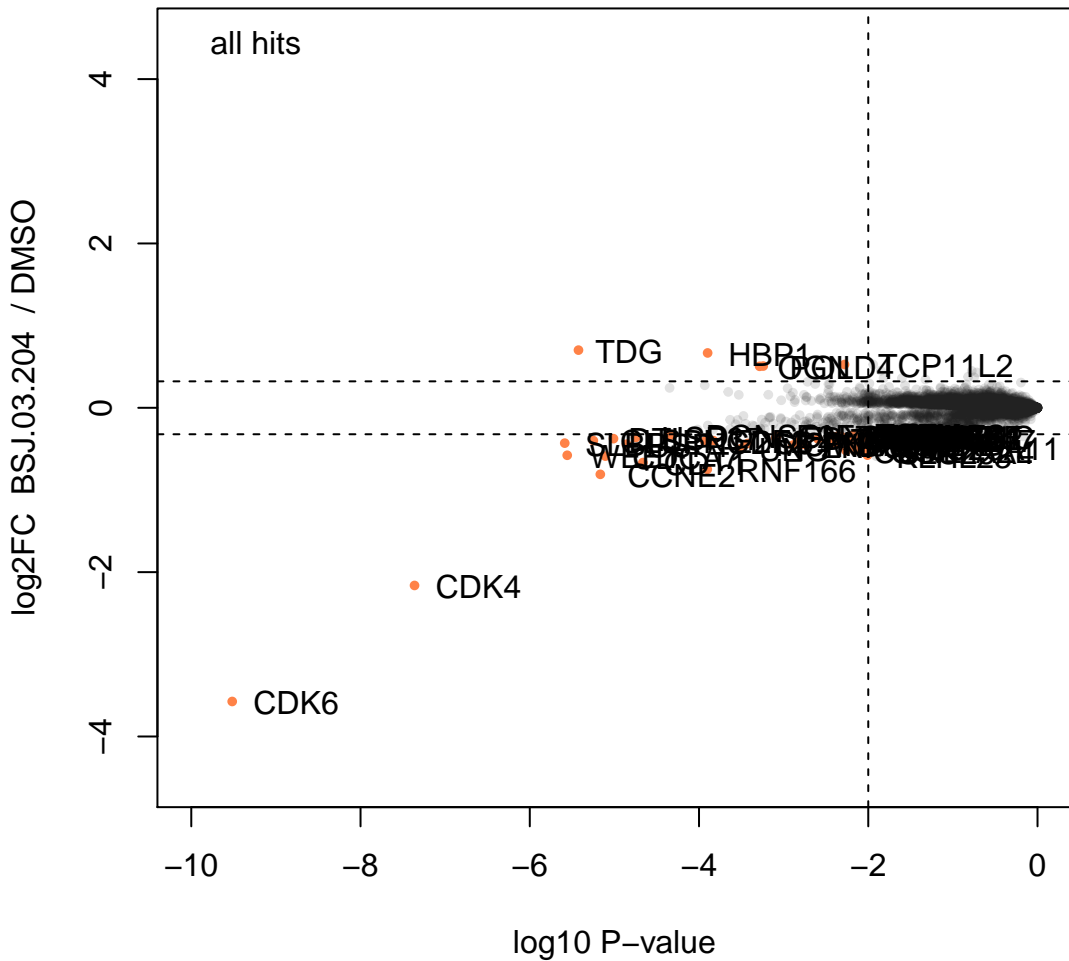

BSJ.03.204 (wp084)

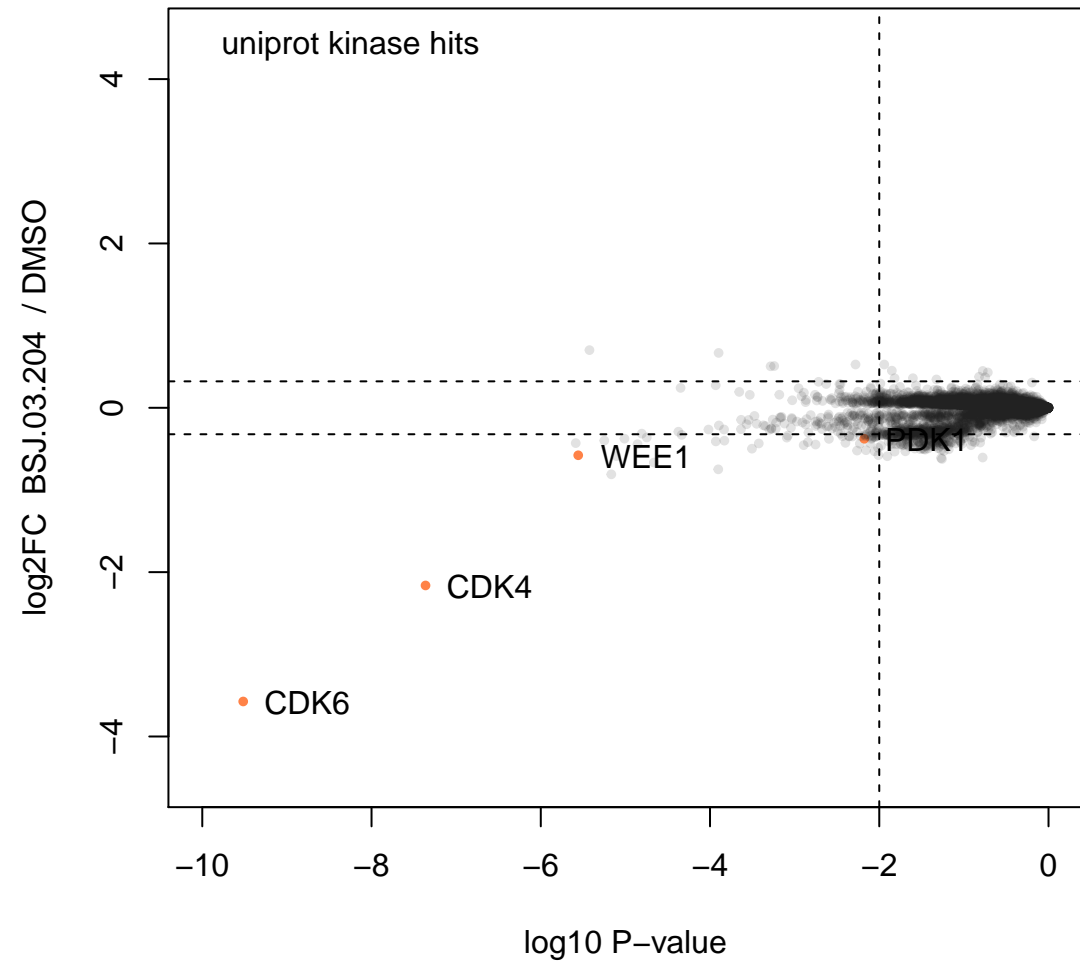

BSJ.03.123 (wp084)

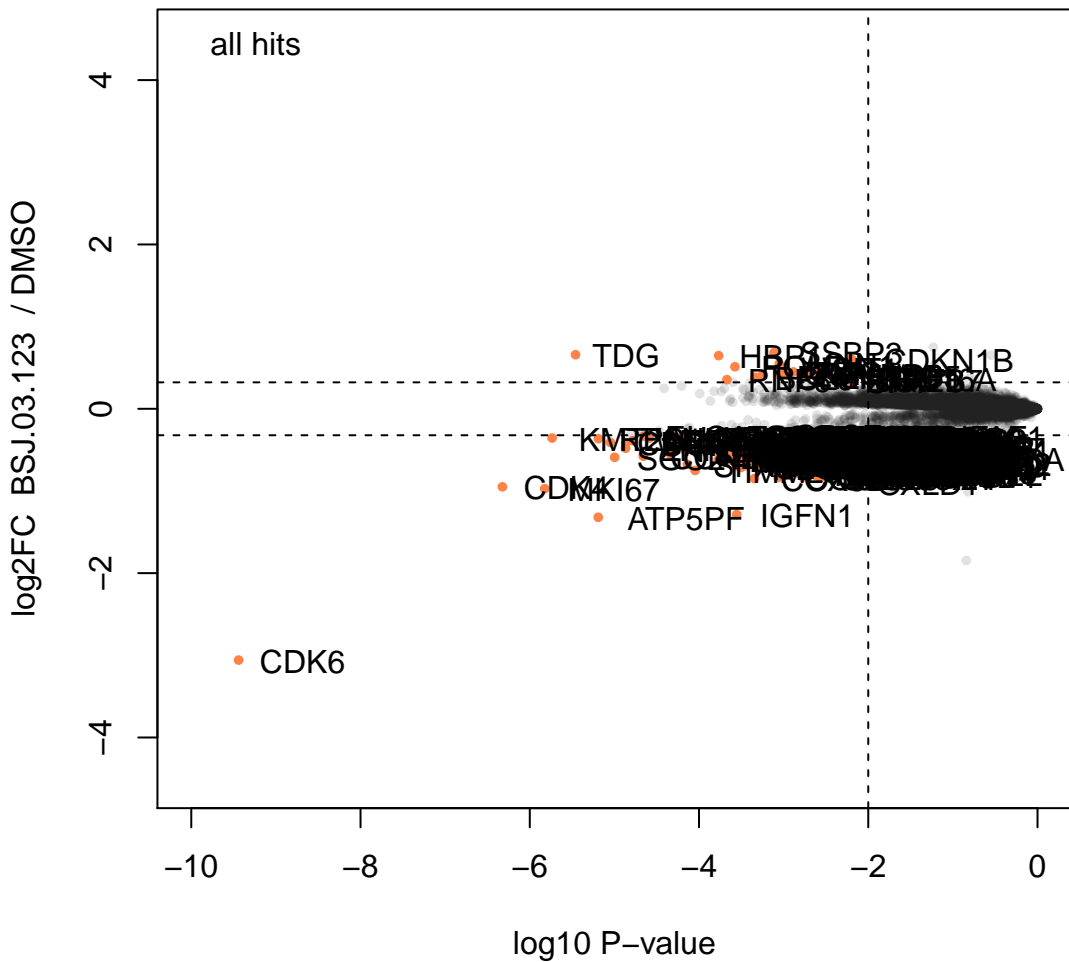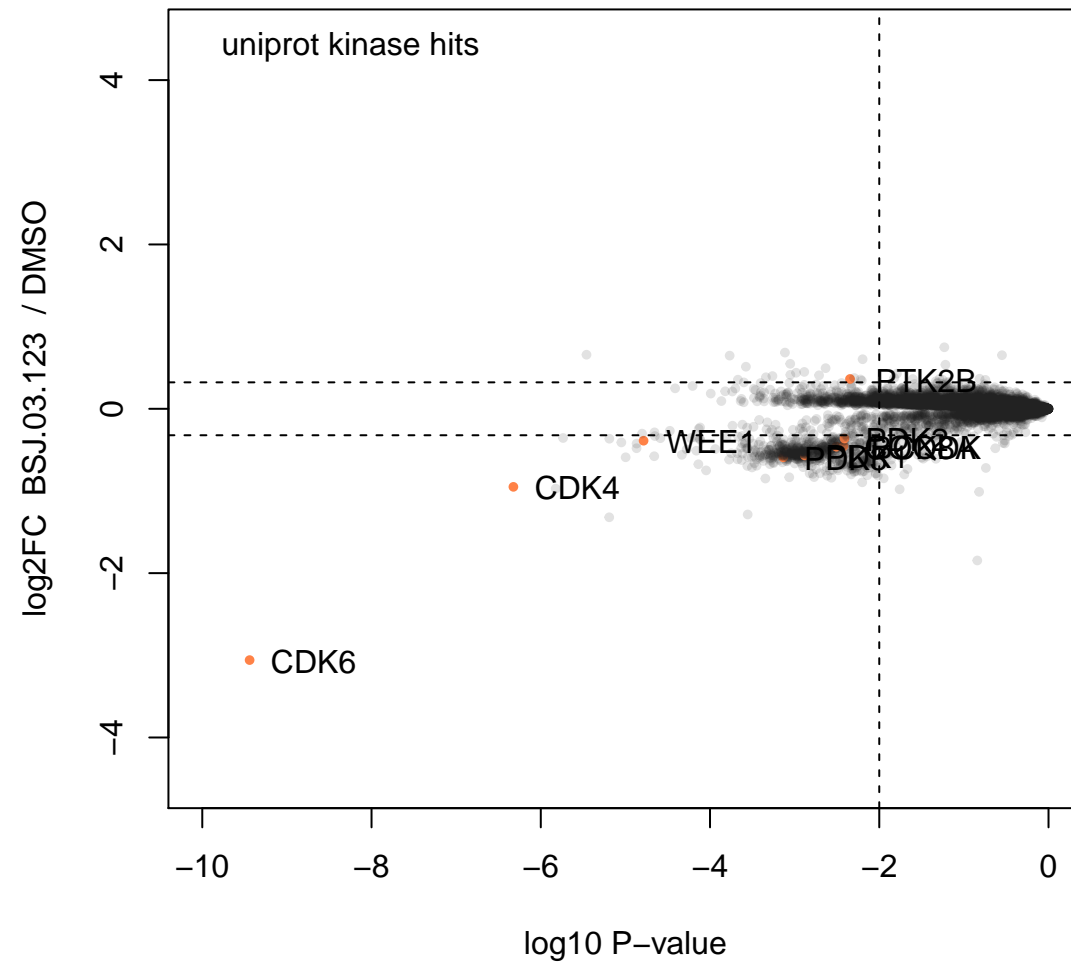

JWG.122 (wp088)

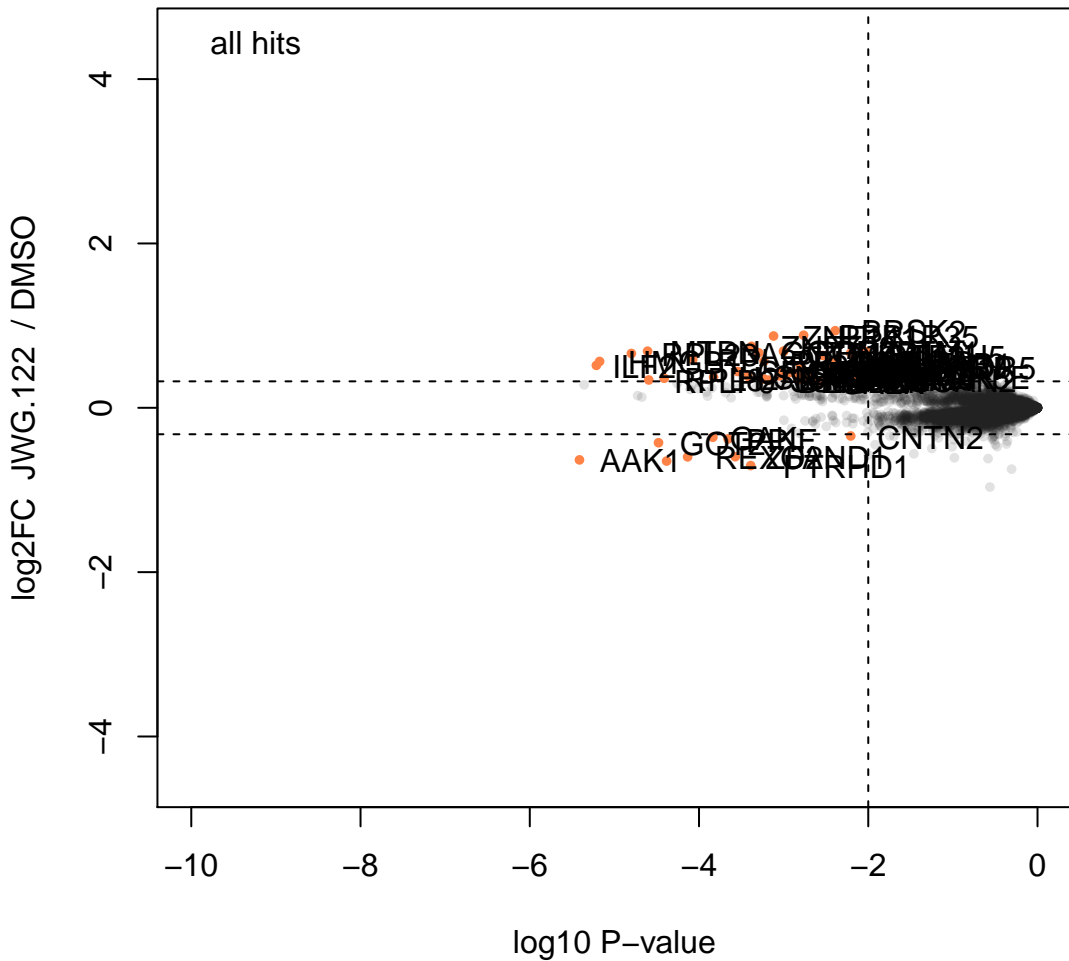

JWG.122 (wp088)

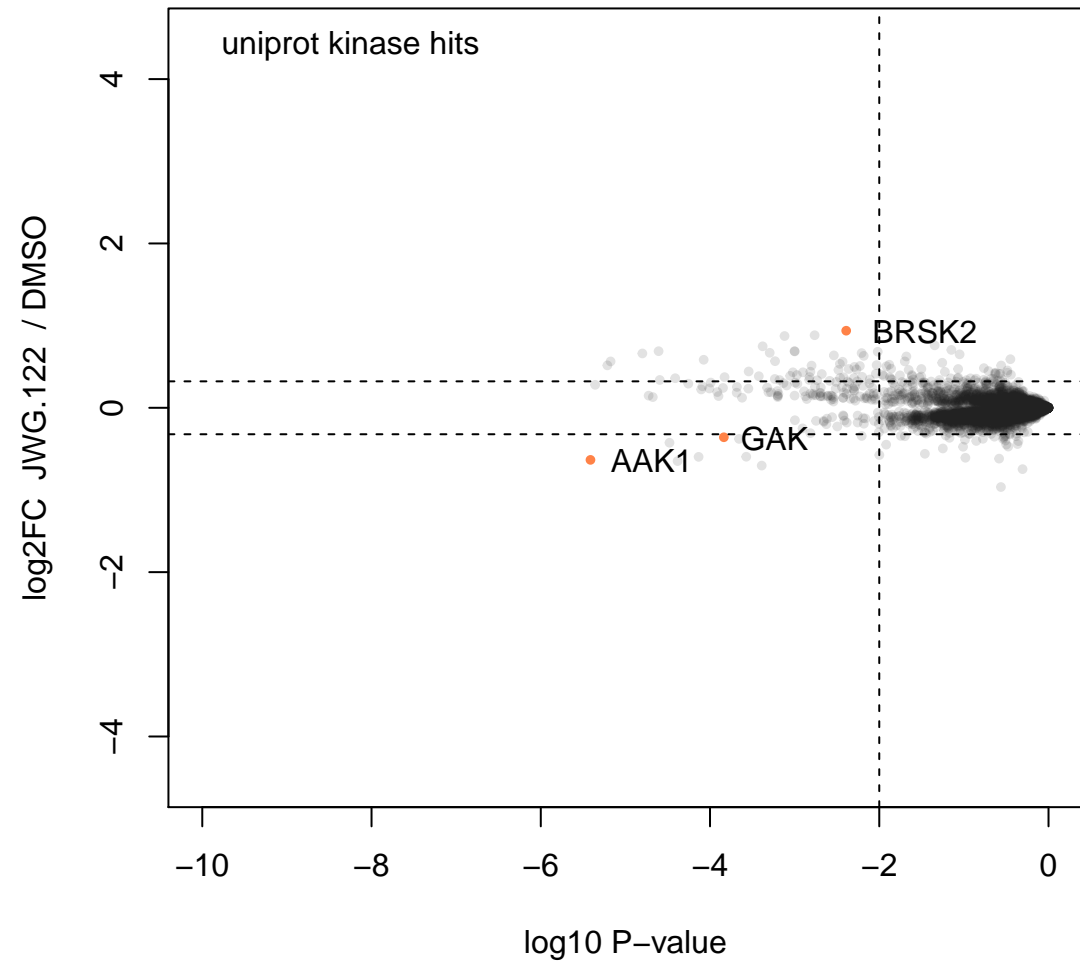

SB1.G.194 (wp088)

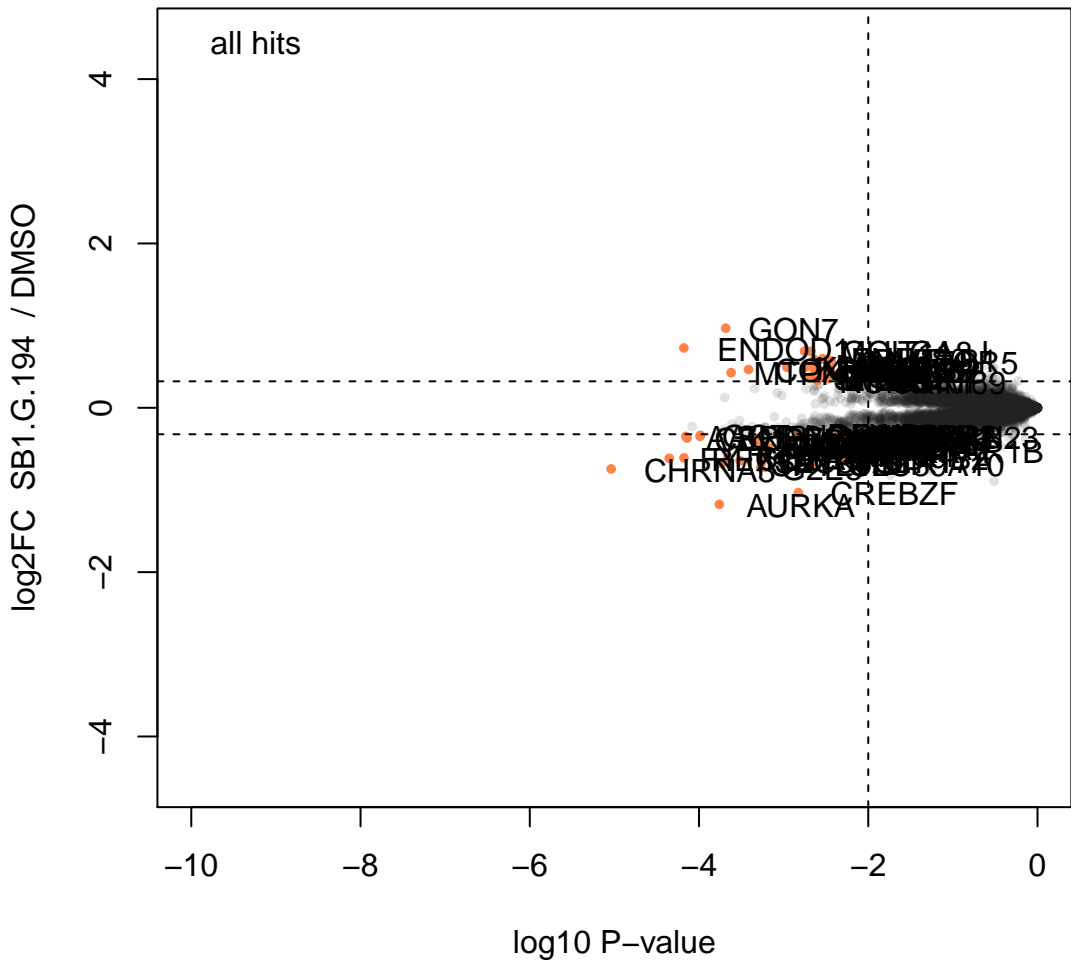

SB1.G.194 (wp088)

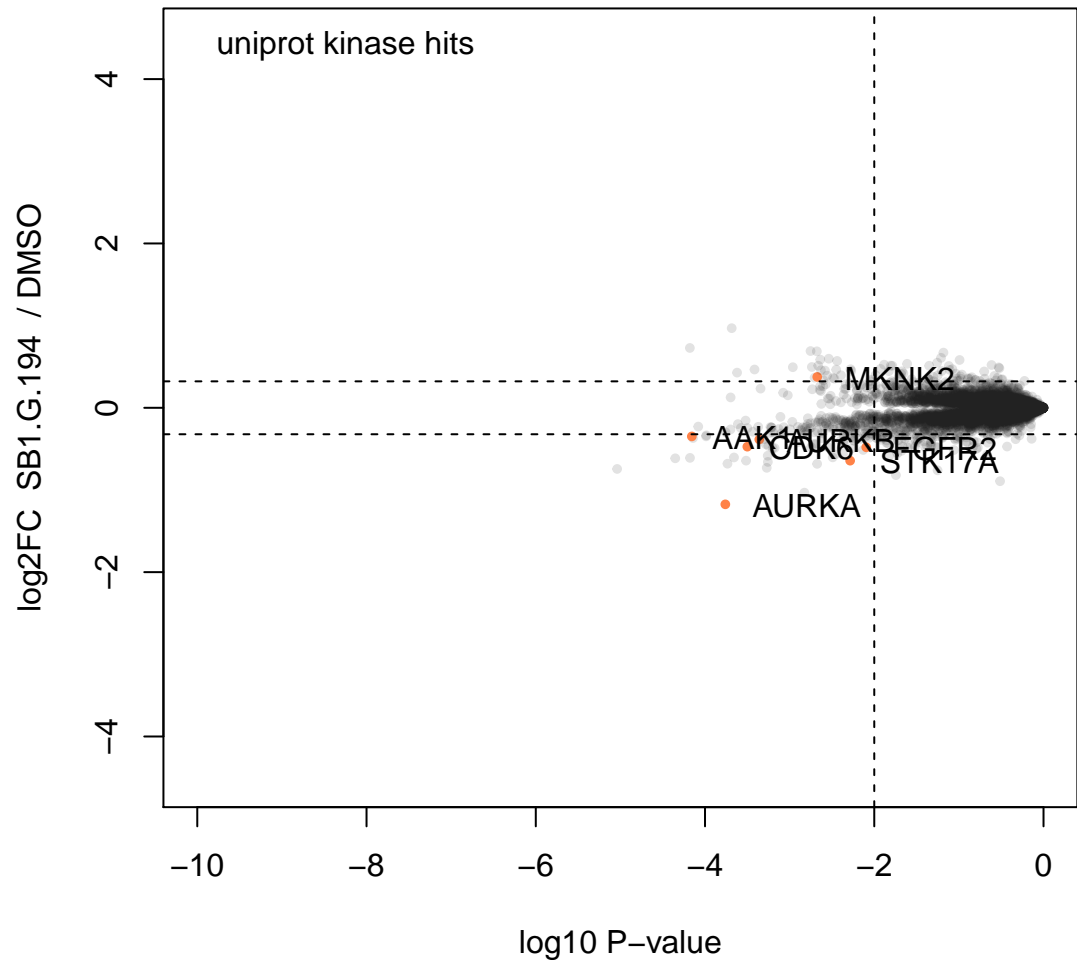

DB0646 (wp103)

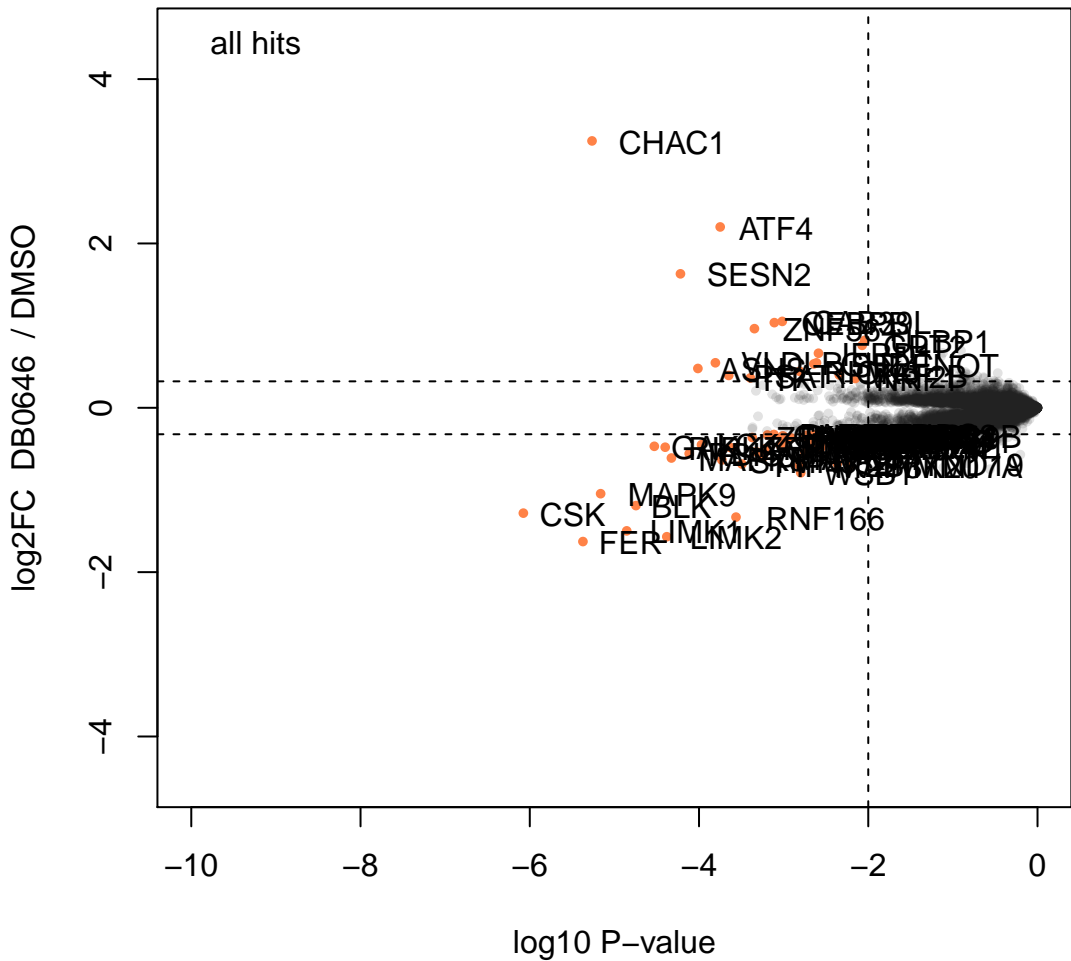

DB0646 (wp103)

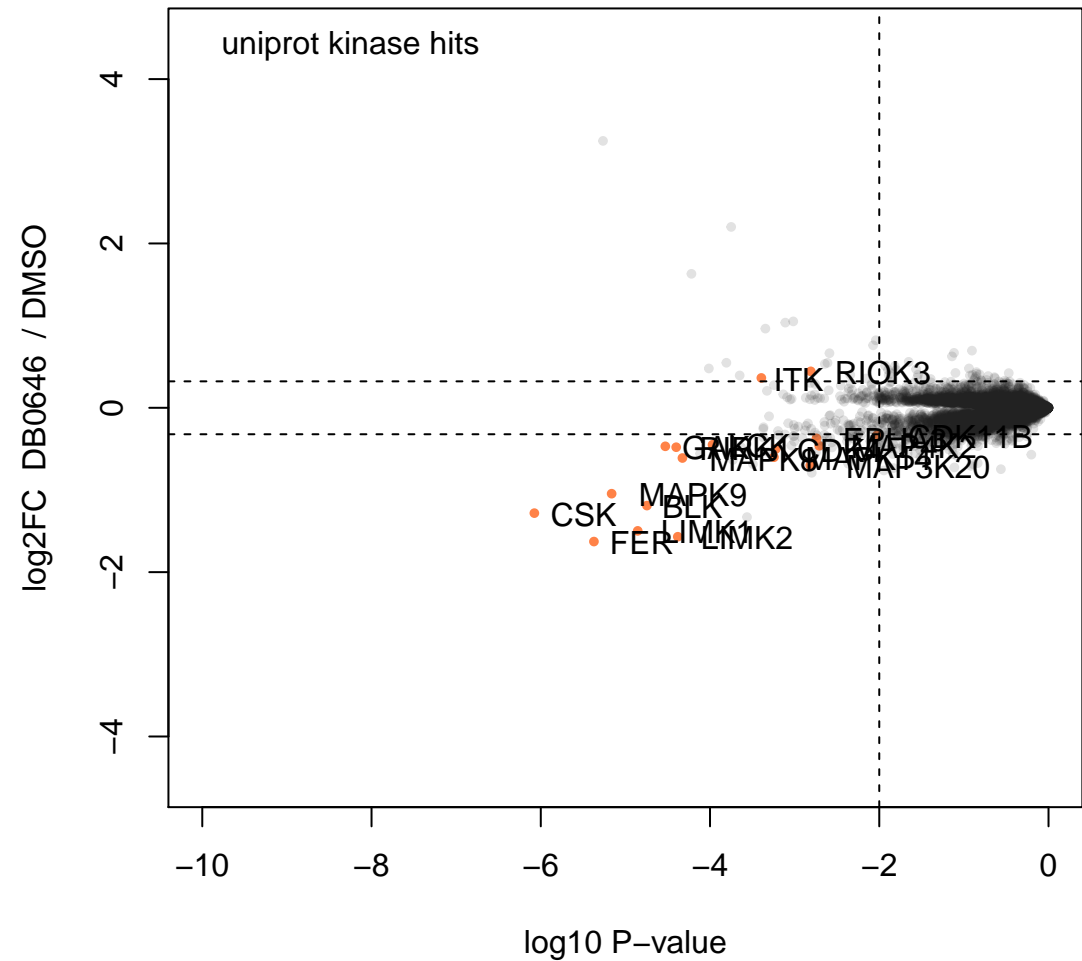

SK.3.91 (wp103)

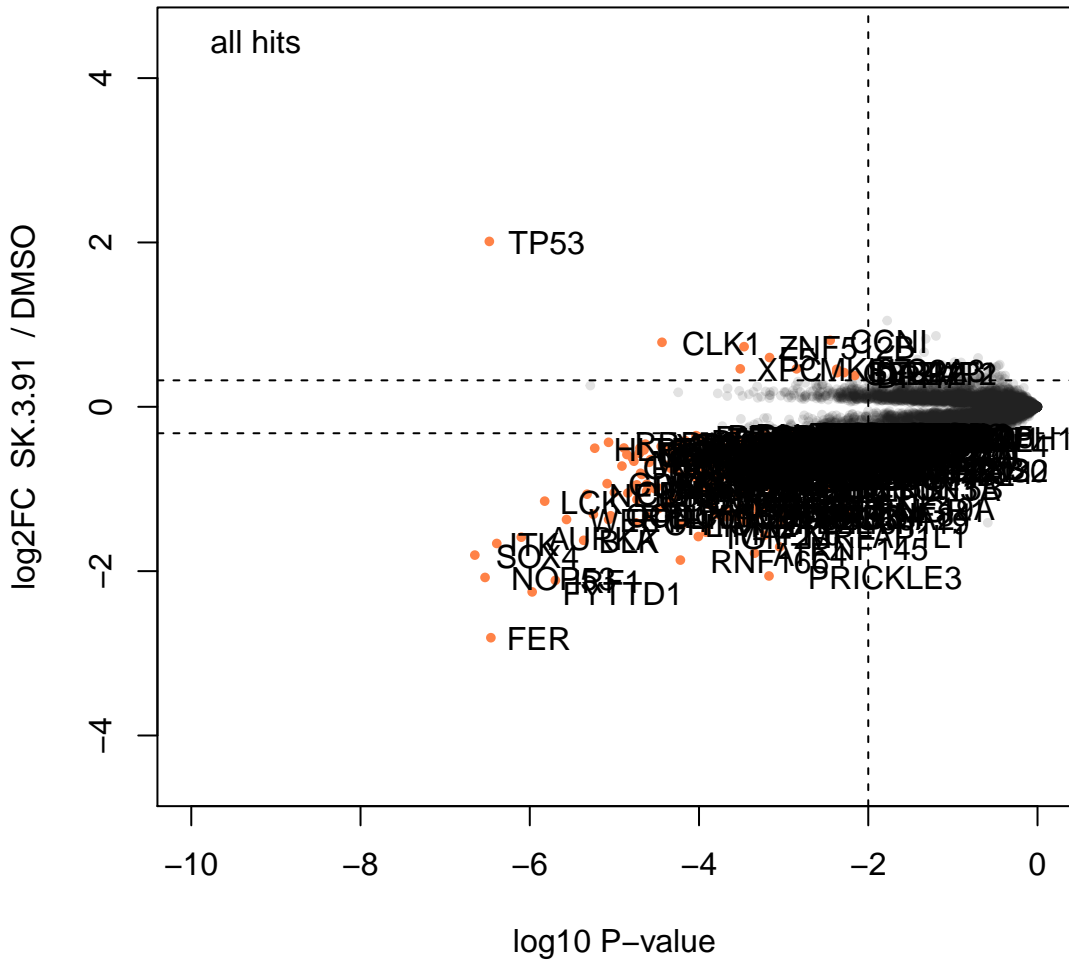

SK.3.91 (wp103)

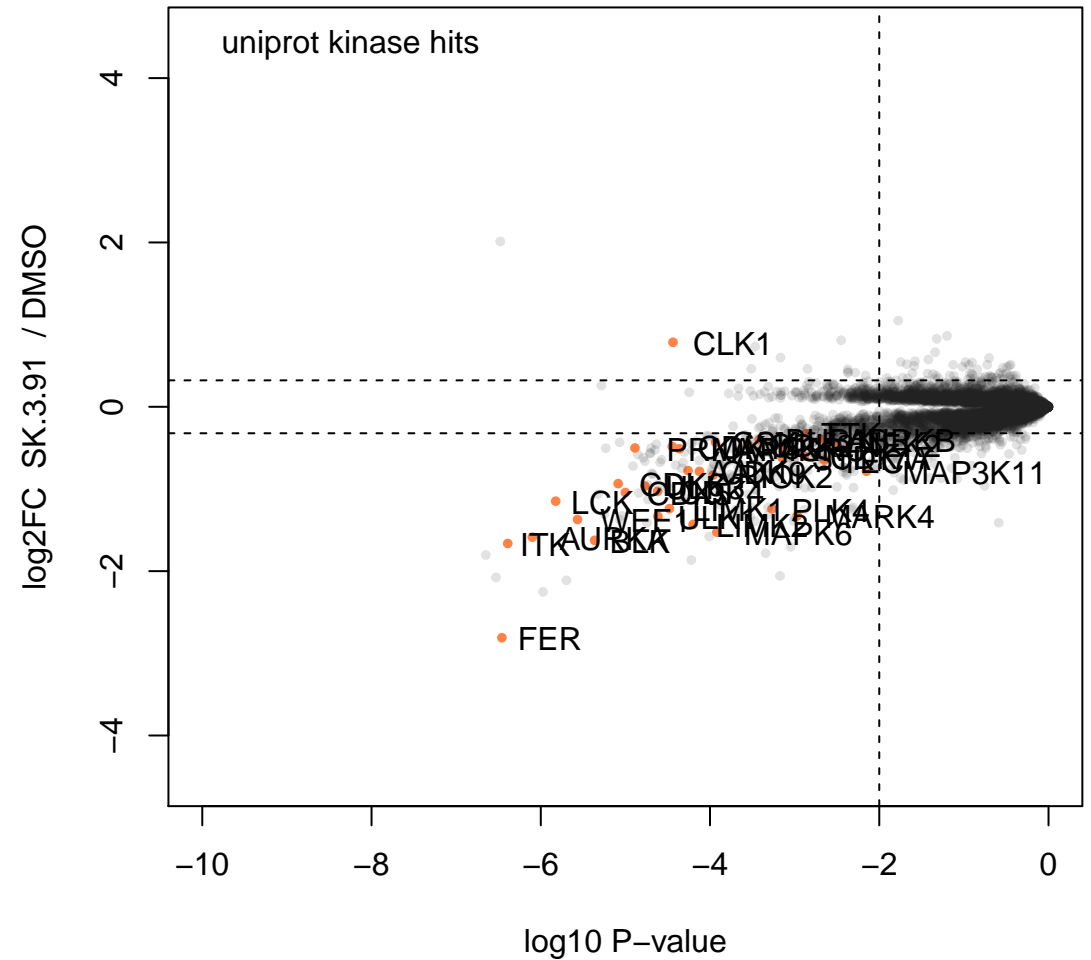

SB1.G.187 (wp103)

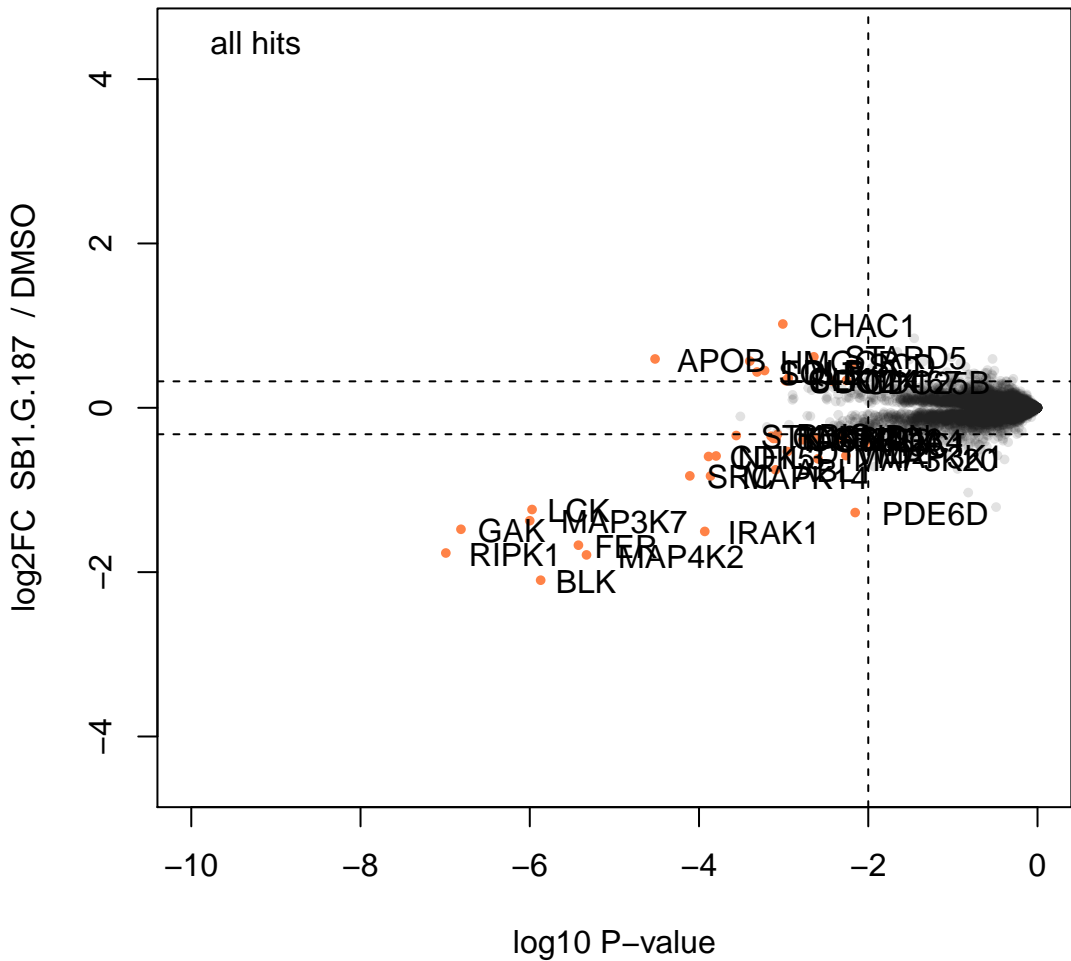

SB1.G.187 (wp103)

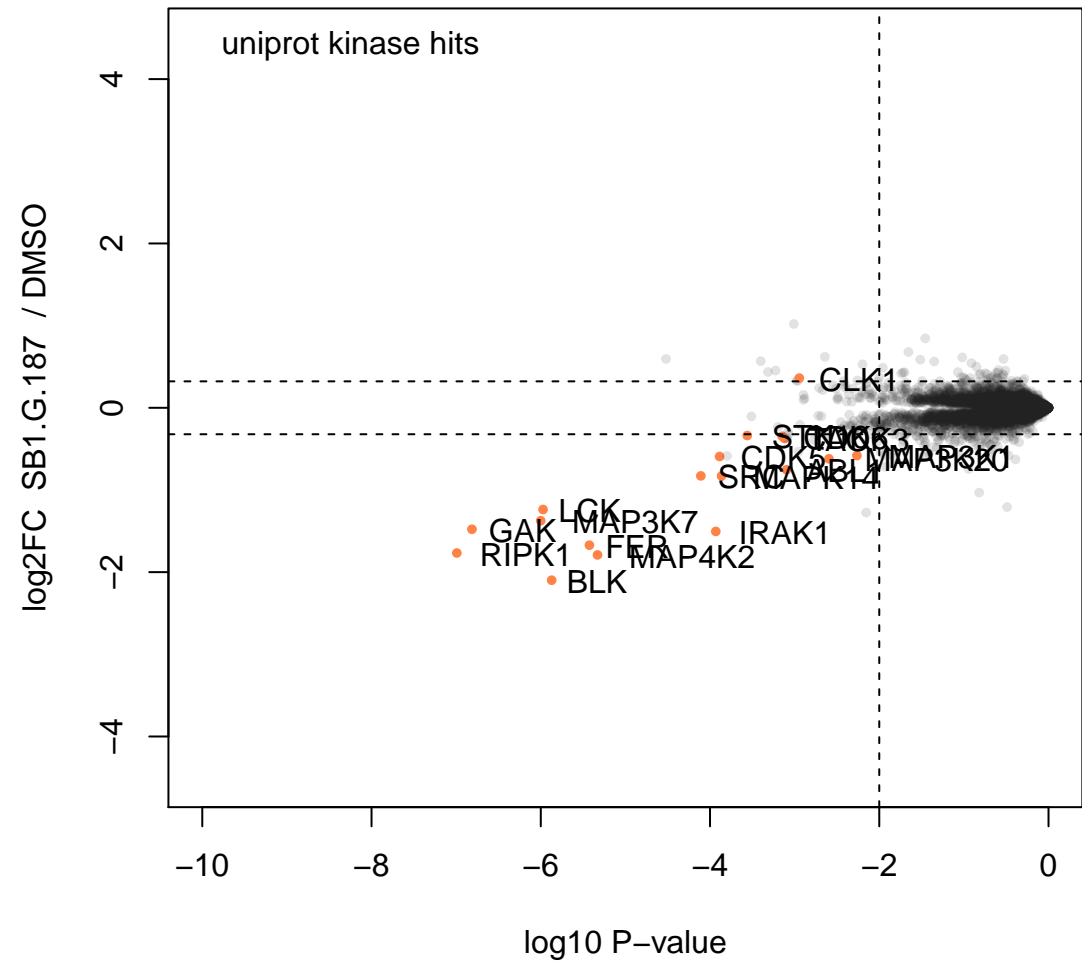



WH.10417.099 (wp103)

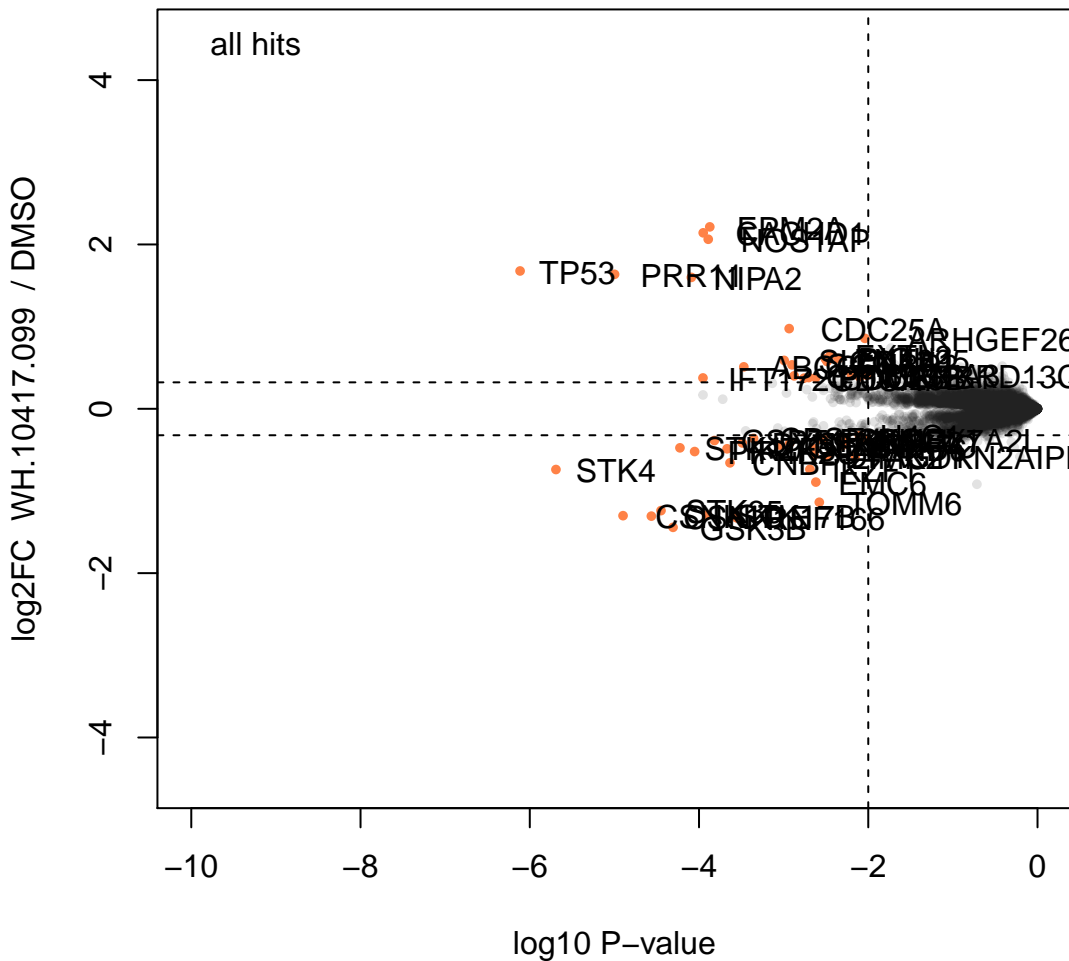

WH.10417.099 (wp103)

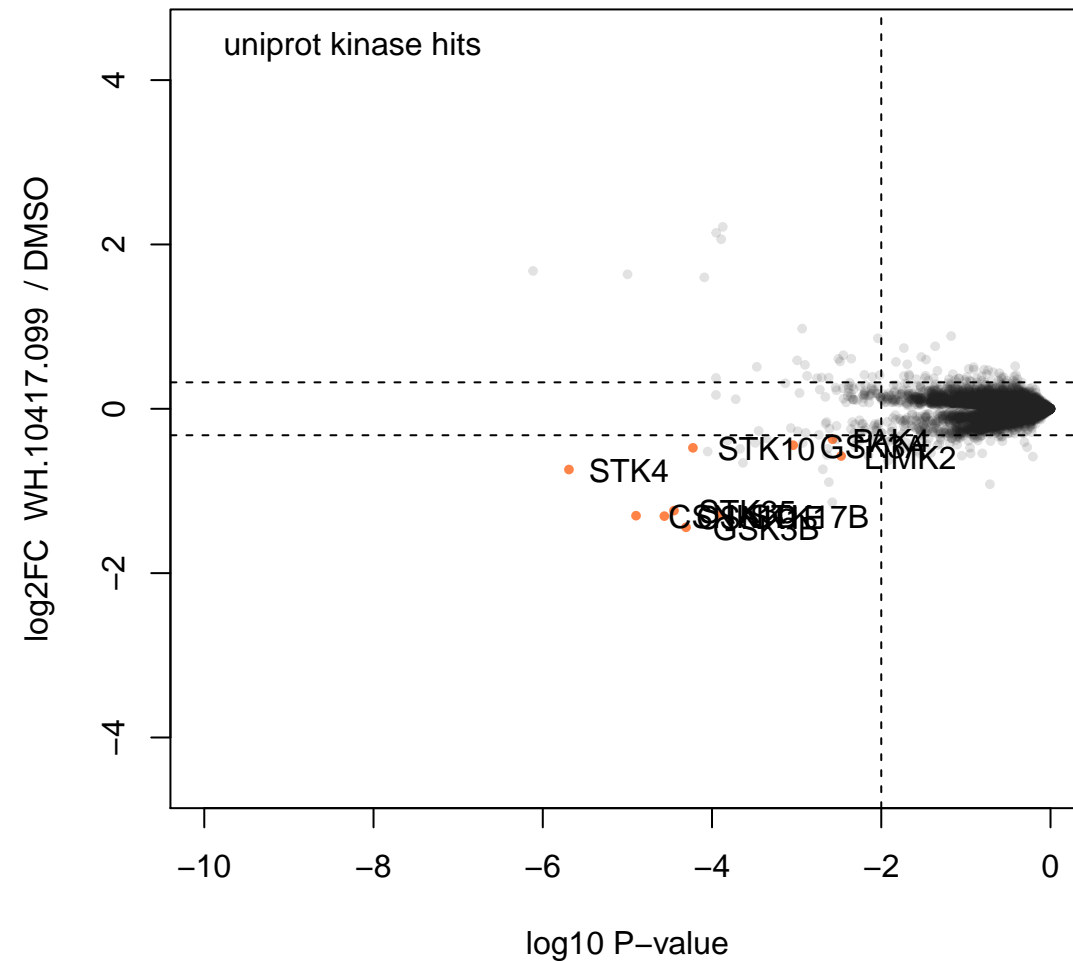

INY.02.164 (wp104)

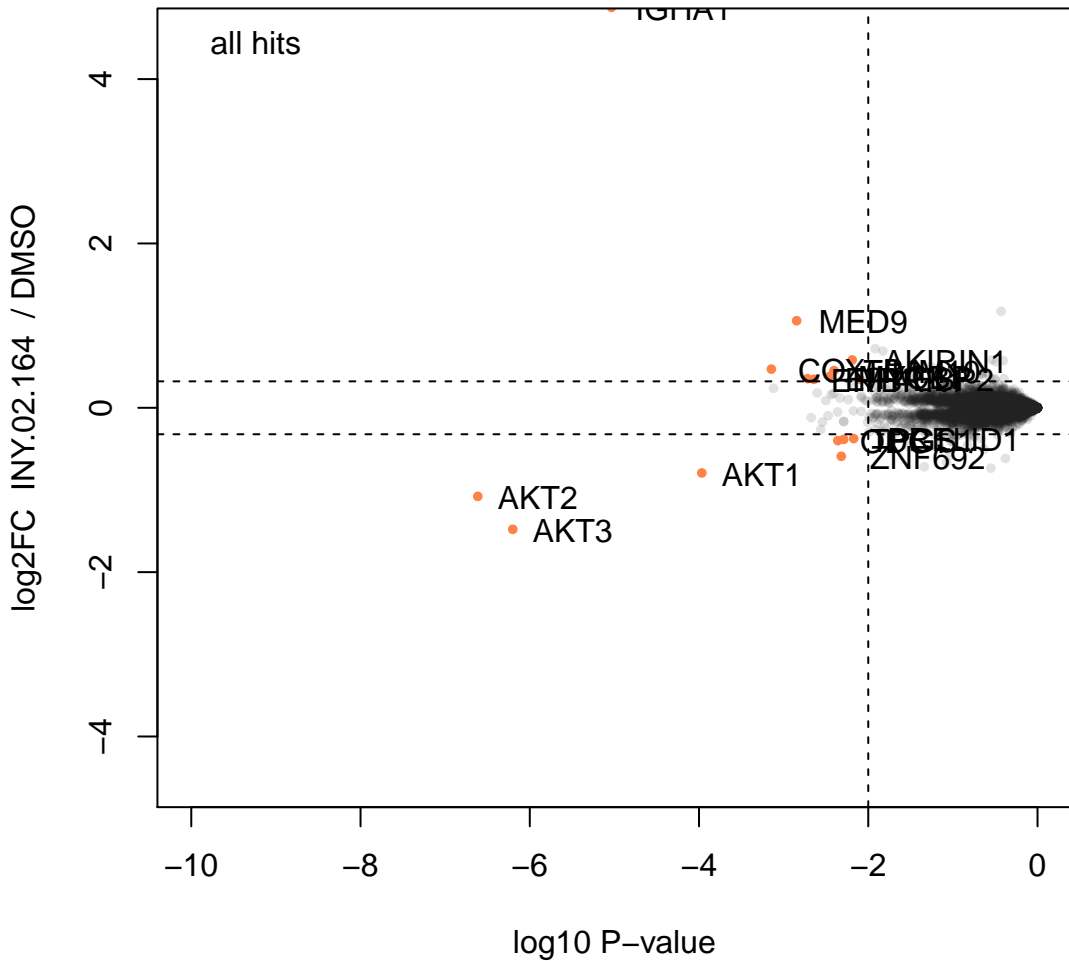

INY.02.164 (wp104)

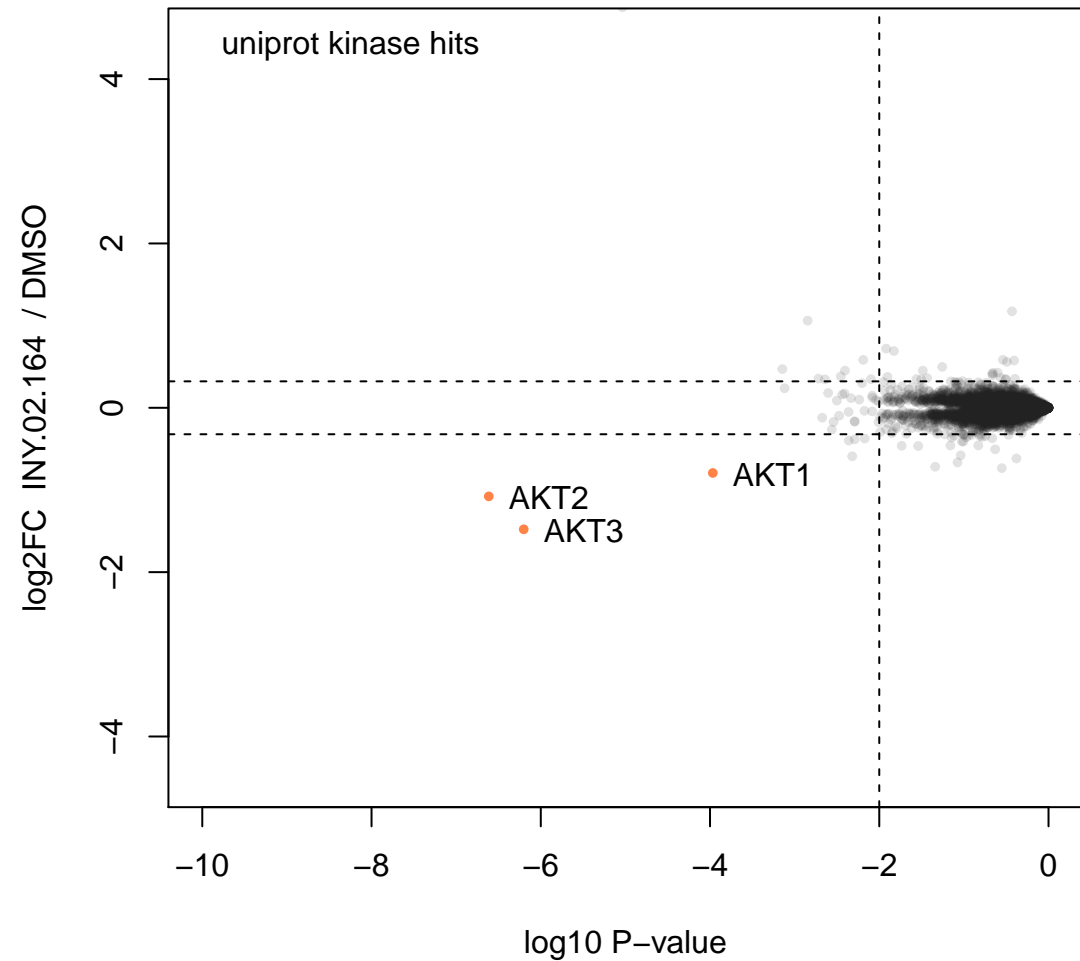

TMX.01.160.1\_0.25 (wp104)

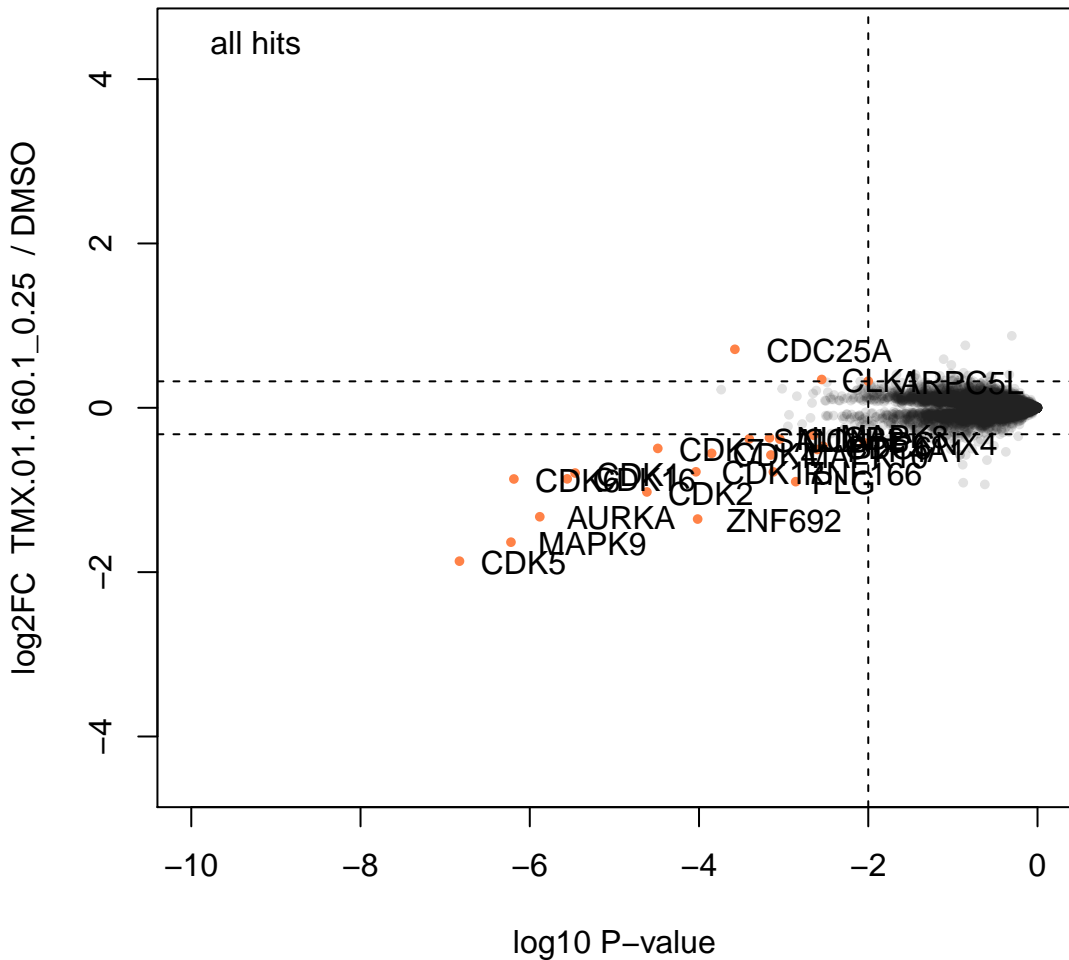

TMX.01.160.1\_0.25 (wp104)

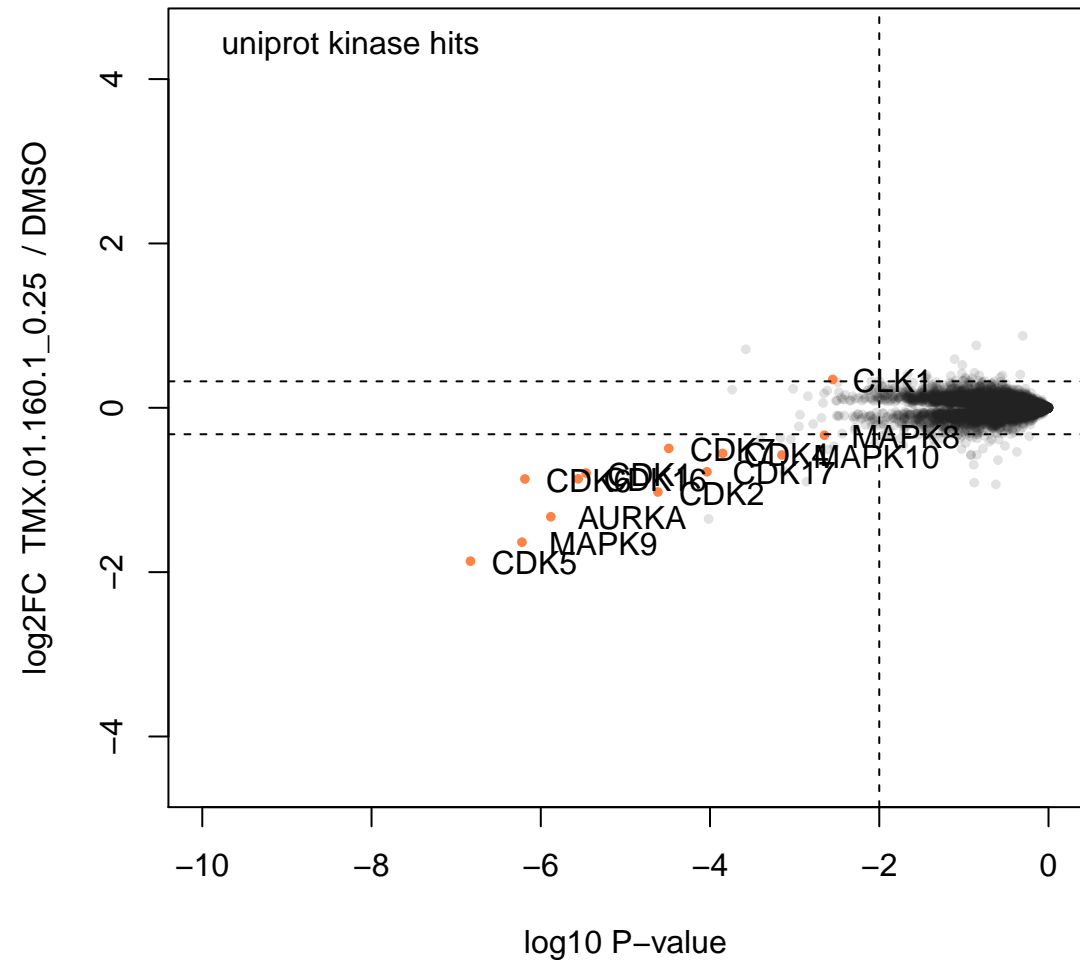

TMX.01.160.1\_1 (wp104)

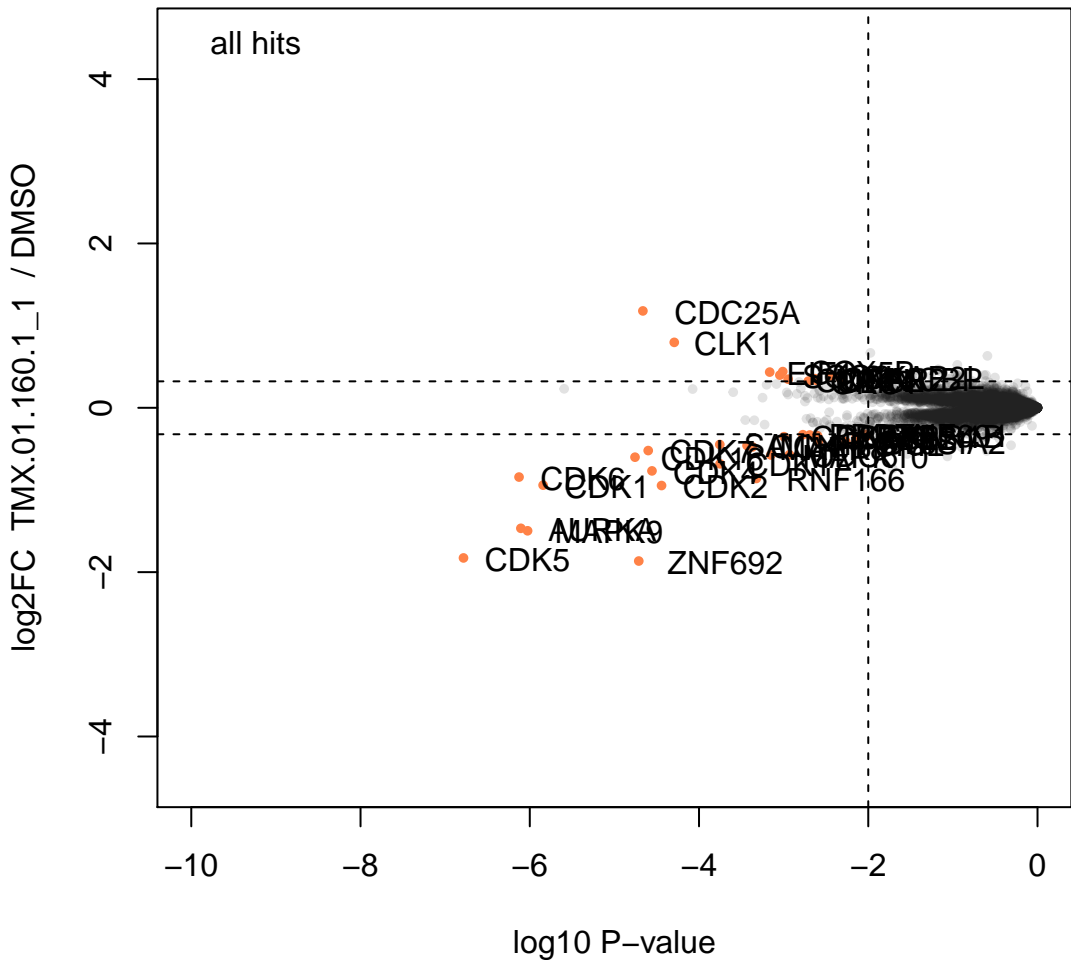

TMX.01.160.1\_1 (wp104)

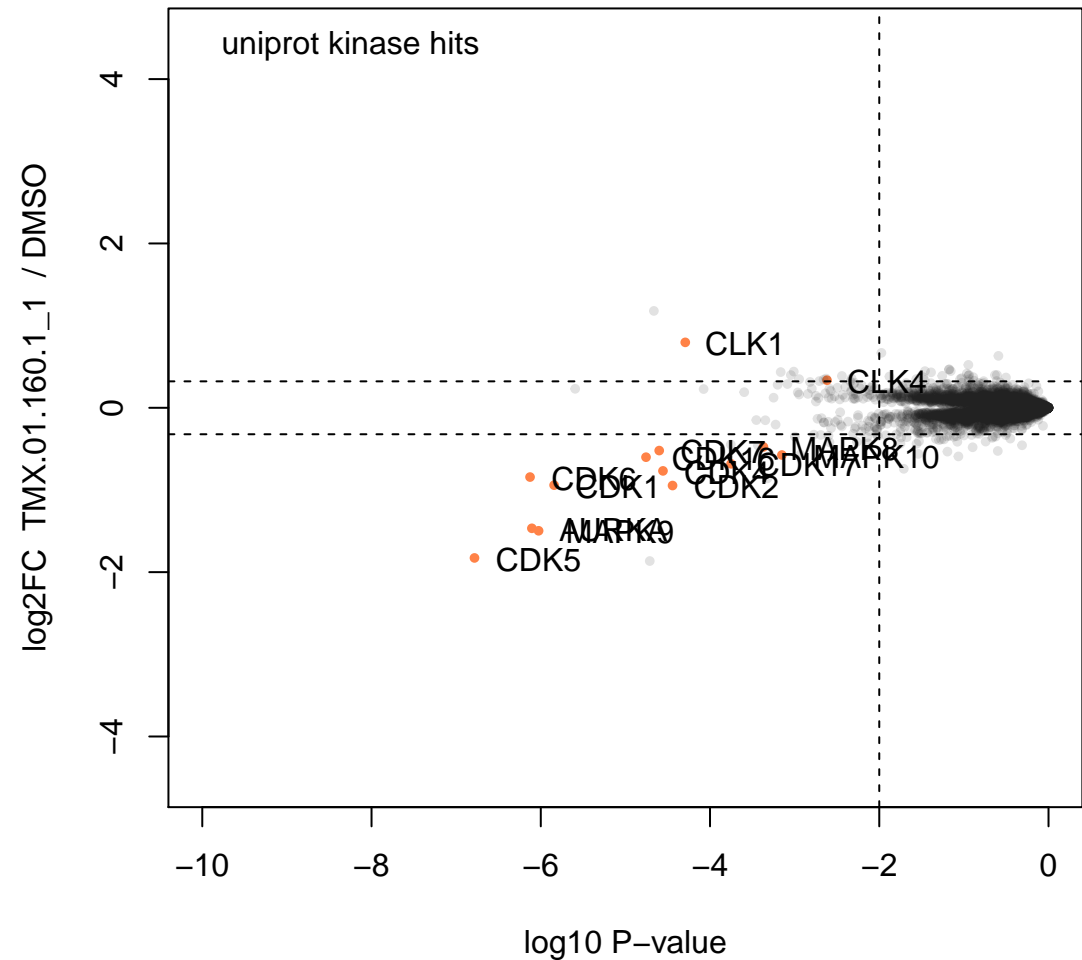

INY.02.105 (wp104)

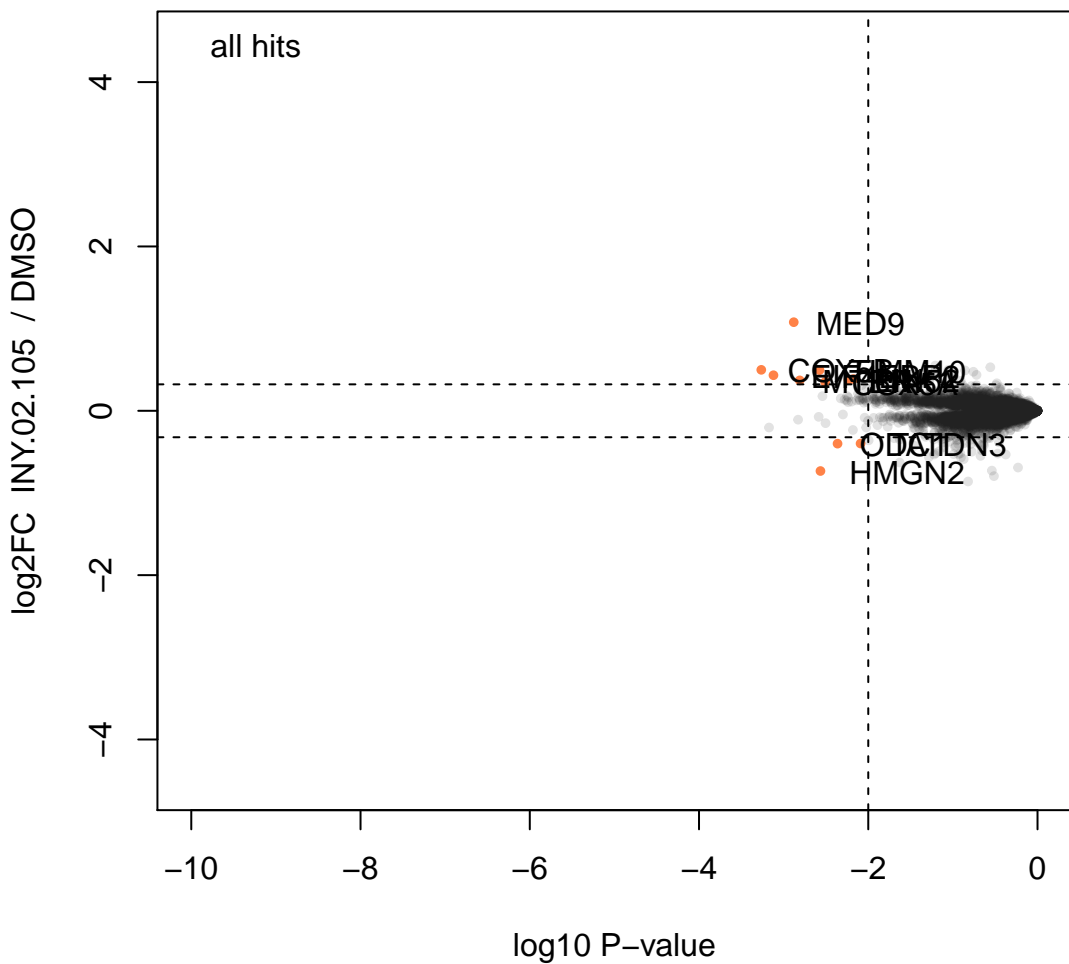

INY.02.105 (wp104)

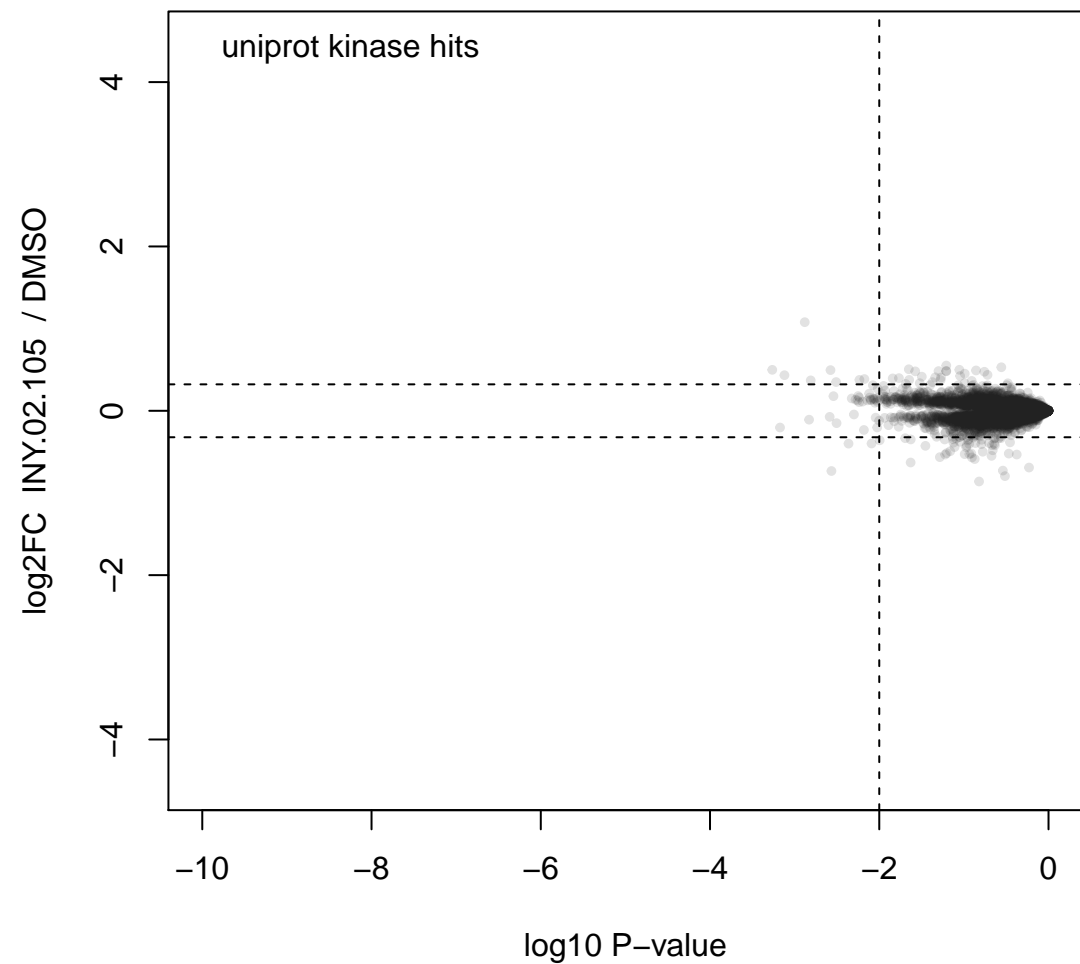

SK.3.91 (wp105)

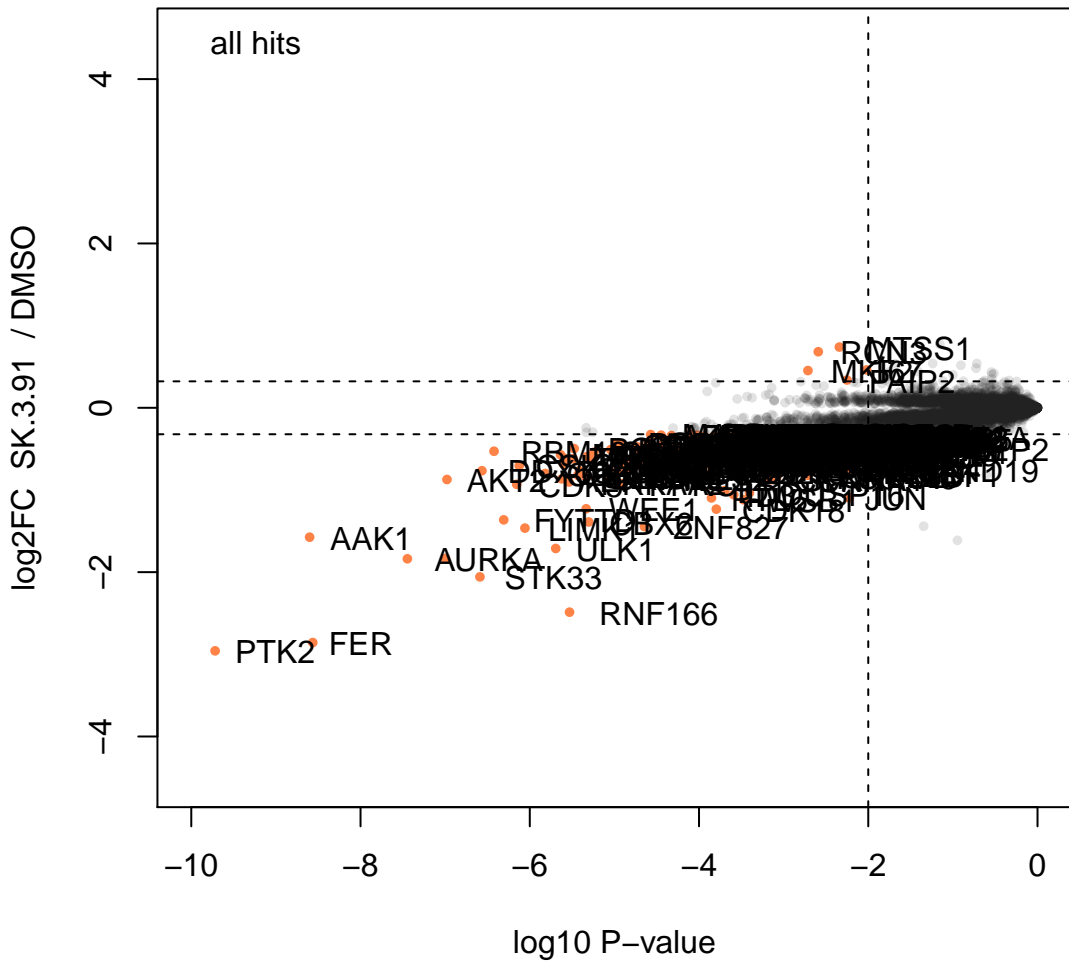

SK.3.91 (wp105)

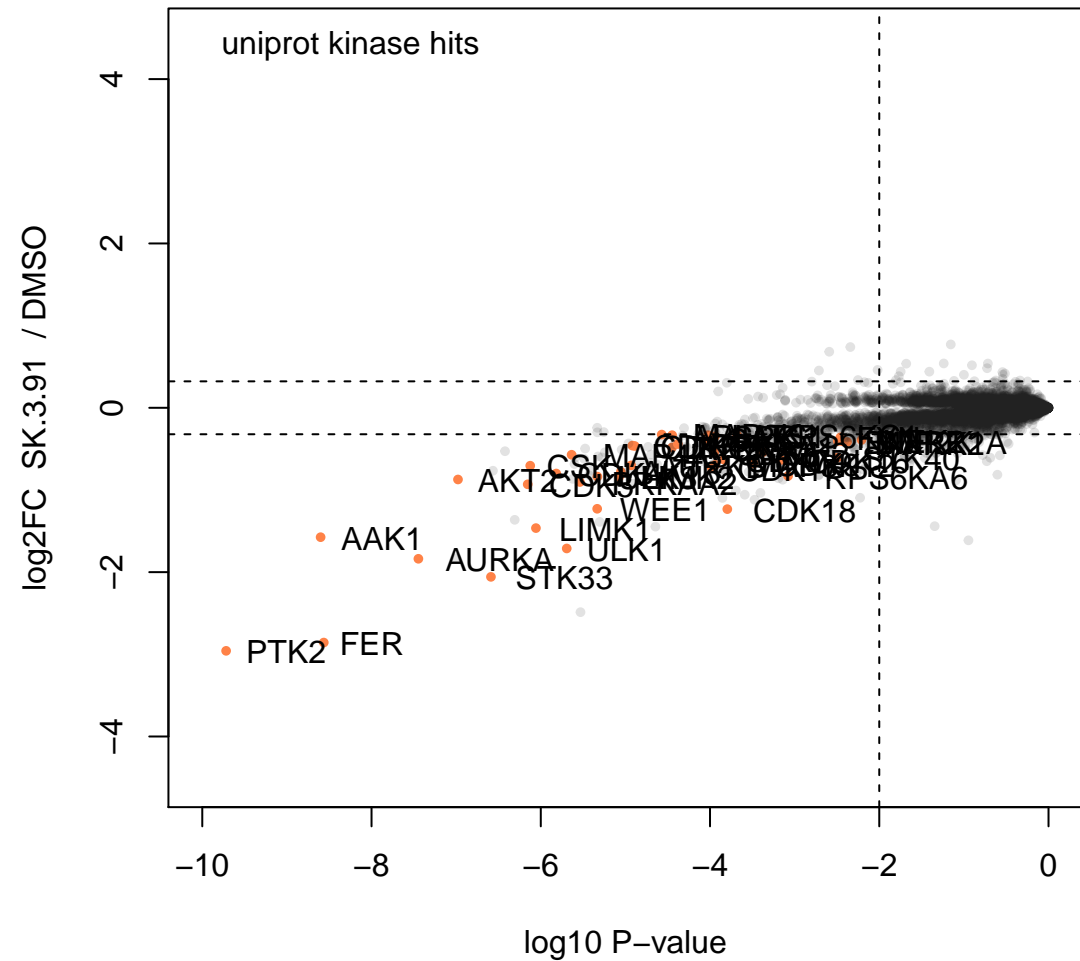

SB1.G.187 (wp105)

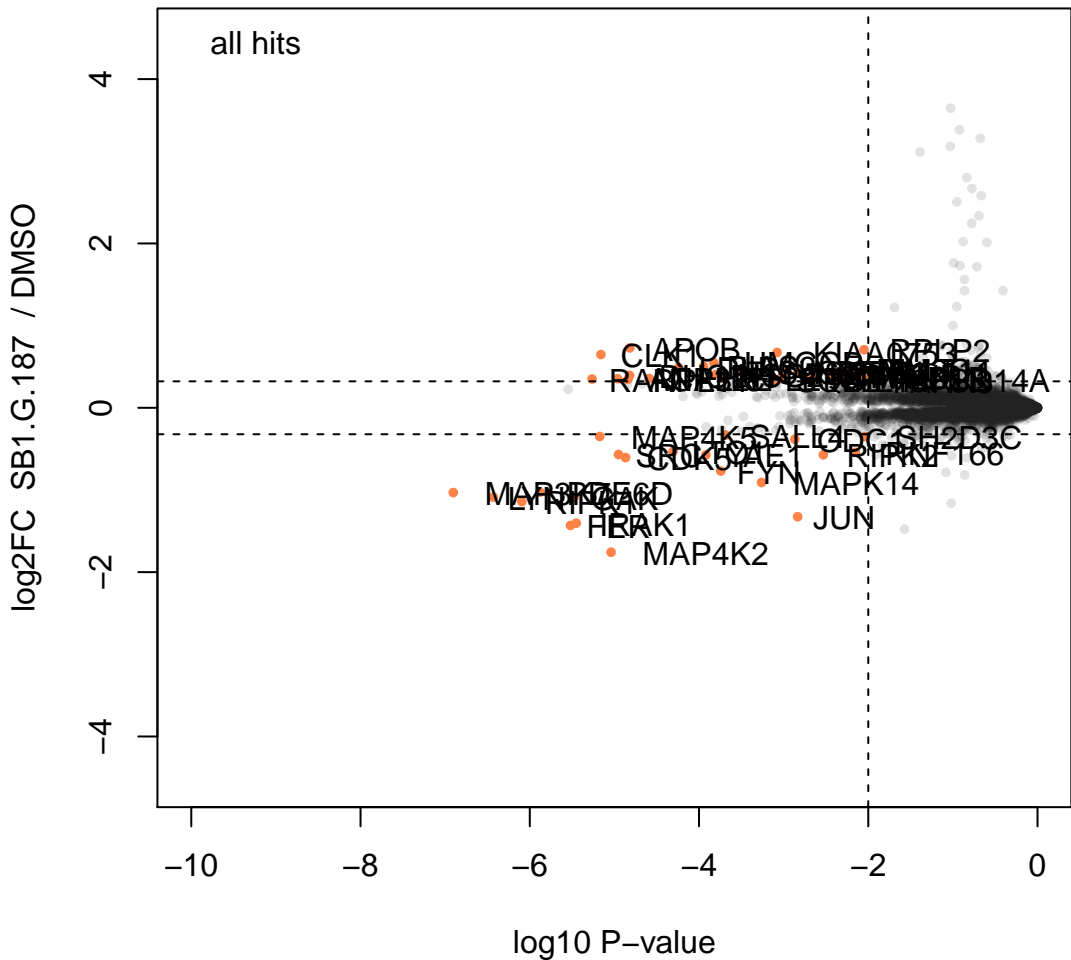

SB1.G.187 (wp105)

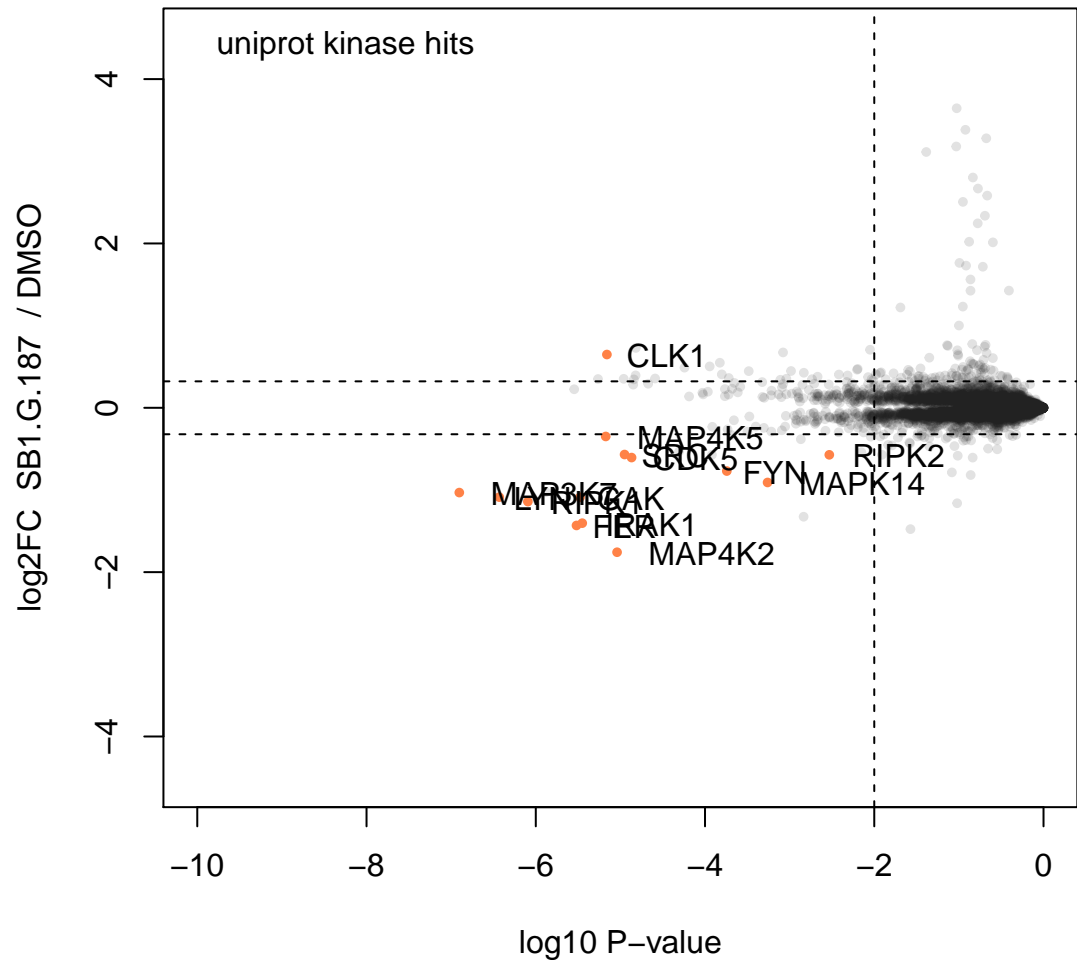

DB0646 (wp105)

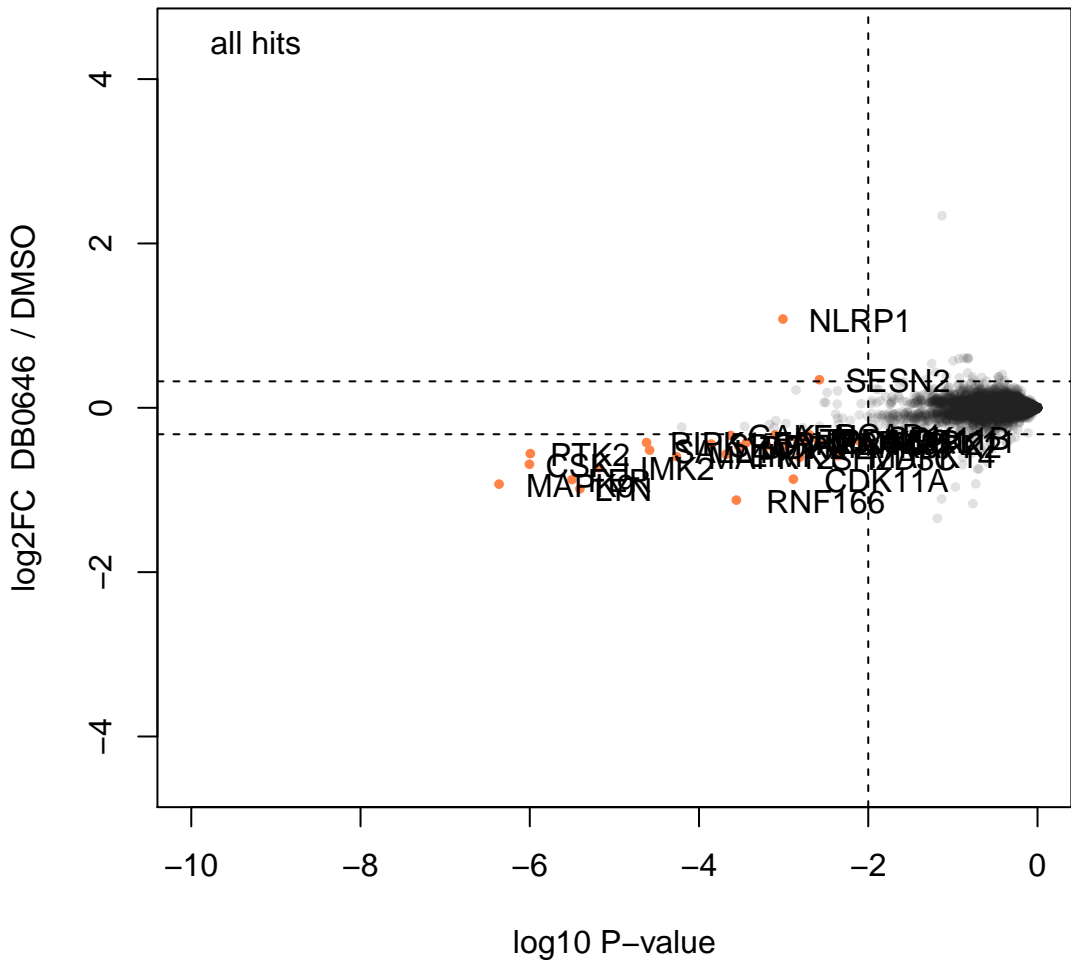

DB0646 (wp105)

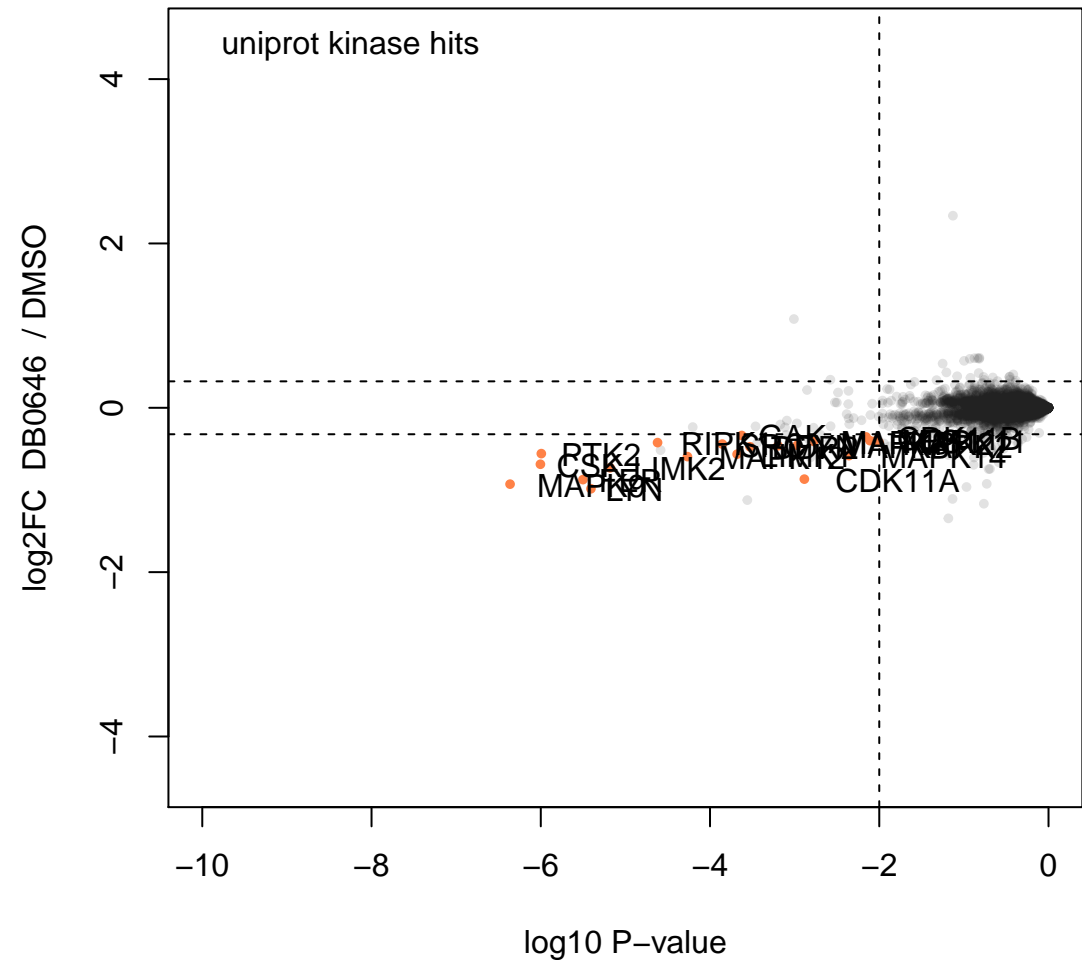



WH.10417.099 (wp105)

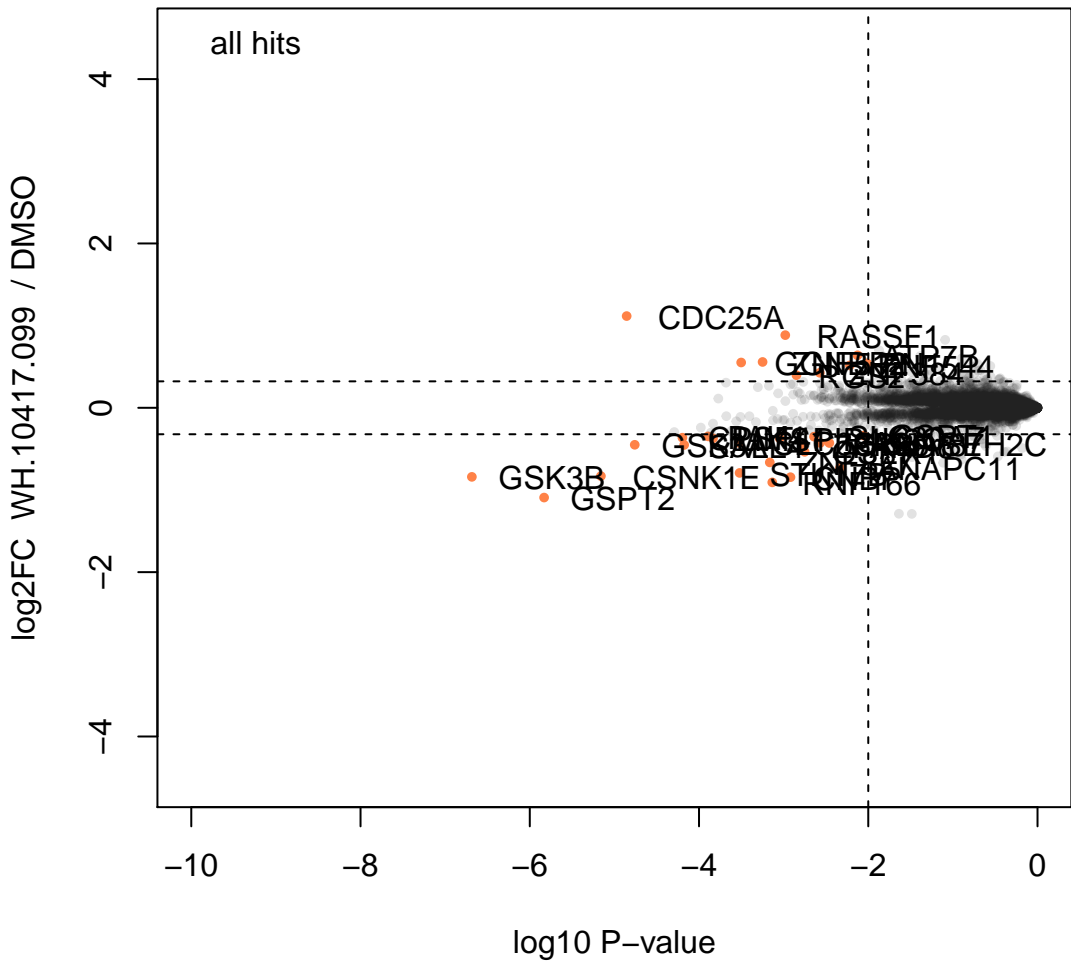

WH.10417.099 (wp105)

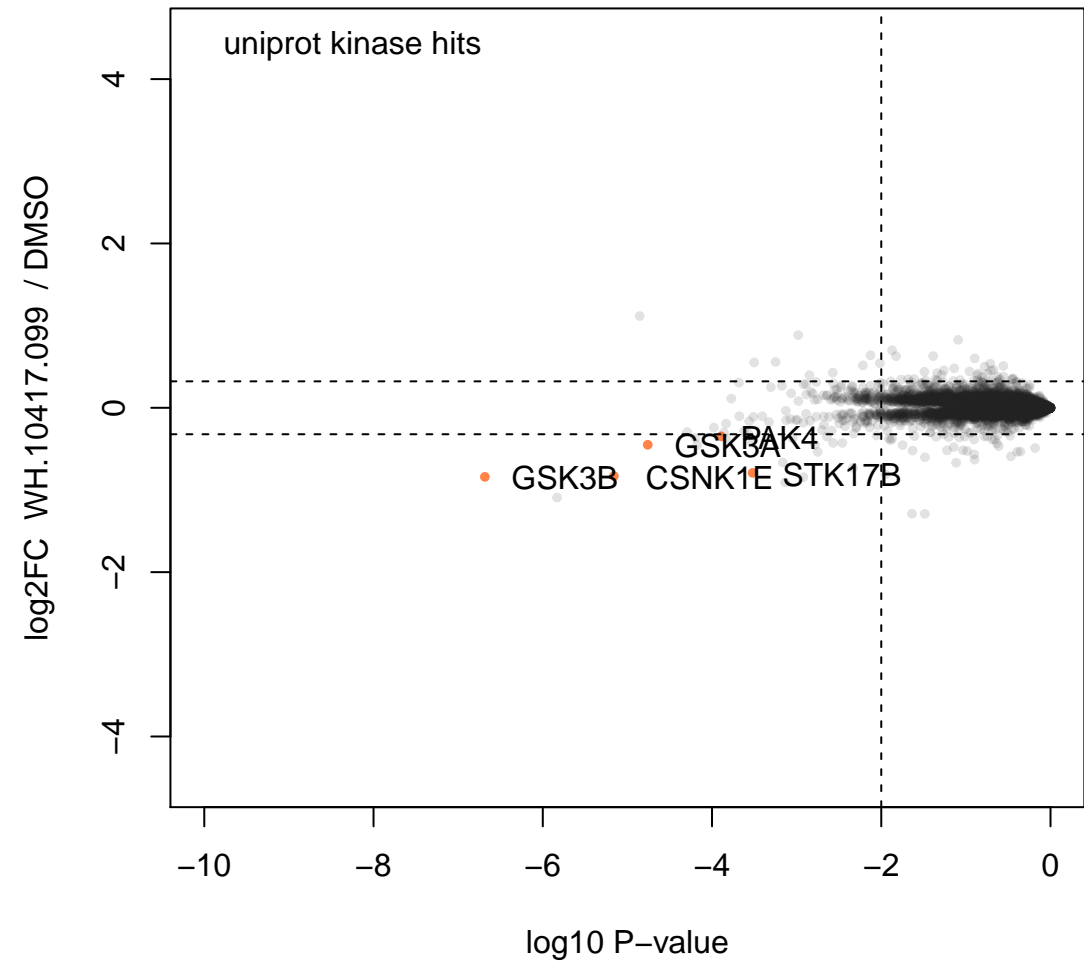

ZNL.02.096\_4hr (wp106)

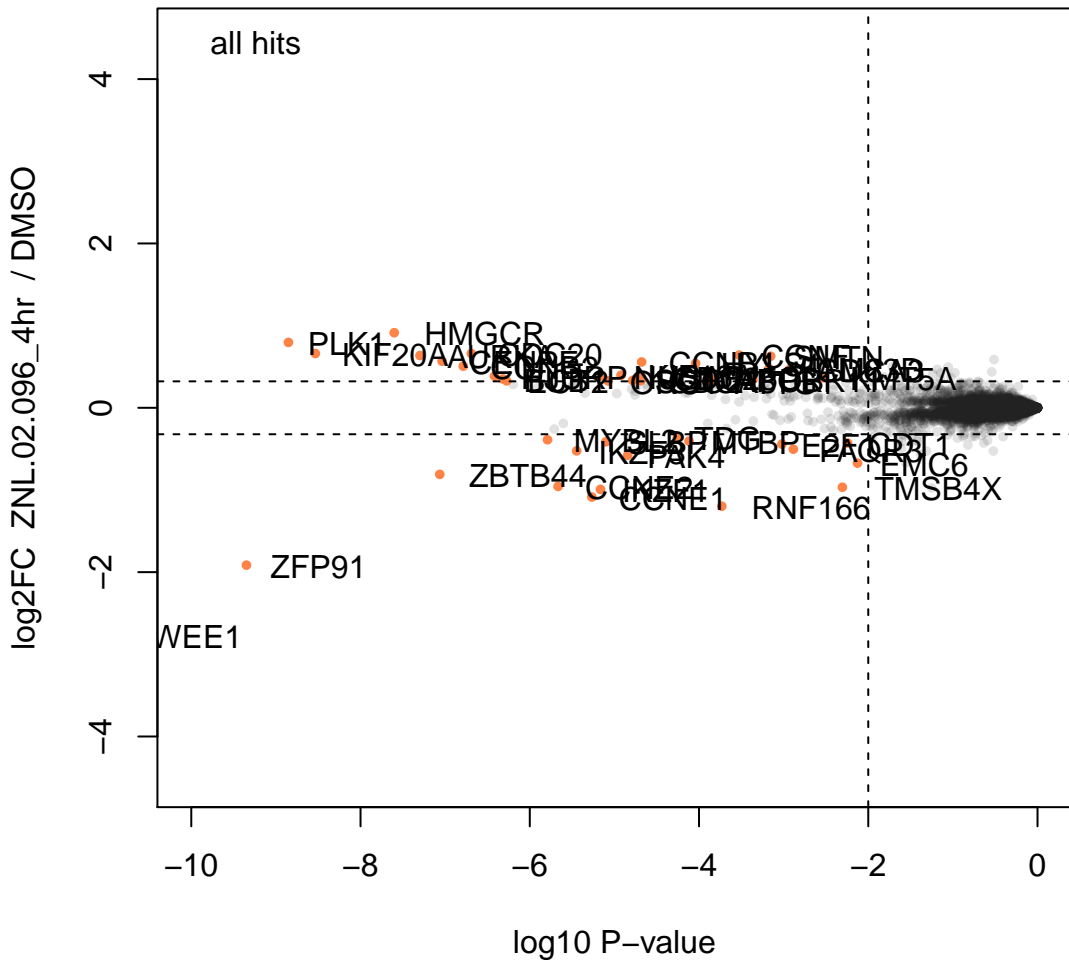

ZNL.02.096\_4hr (wp106)

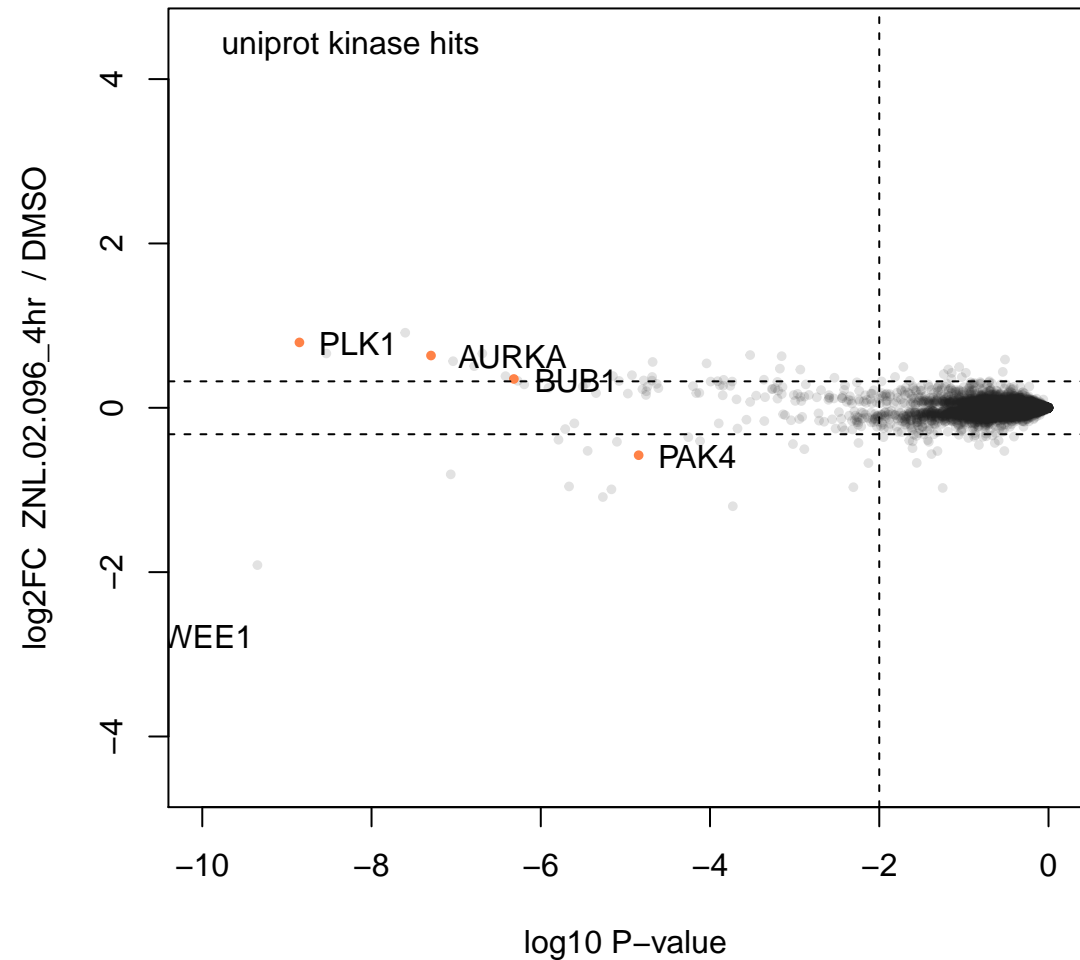

ZNL.02.096\_2hr (wp106)

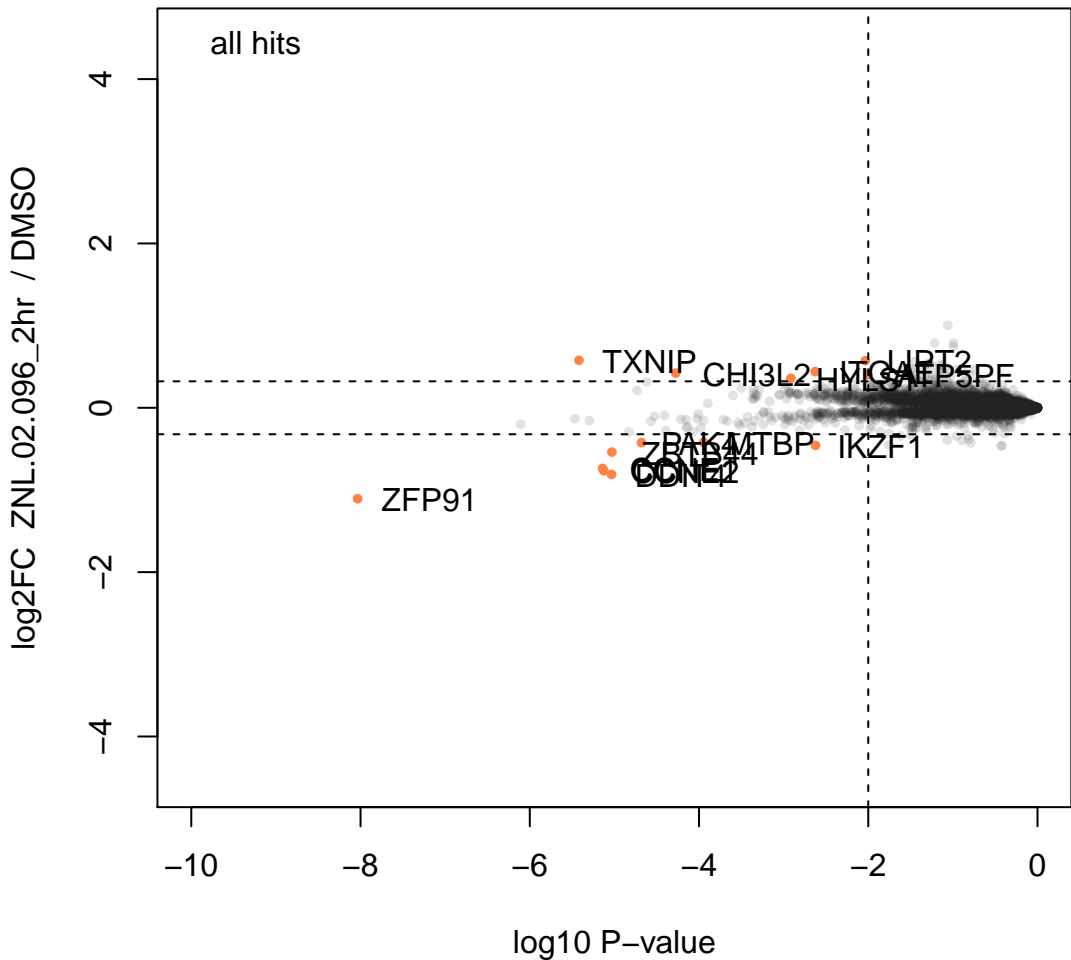

ZNL.02.096\_2hr (wp106)

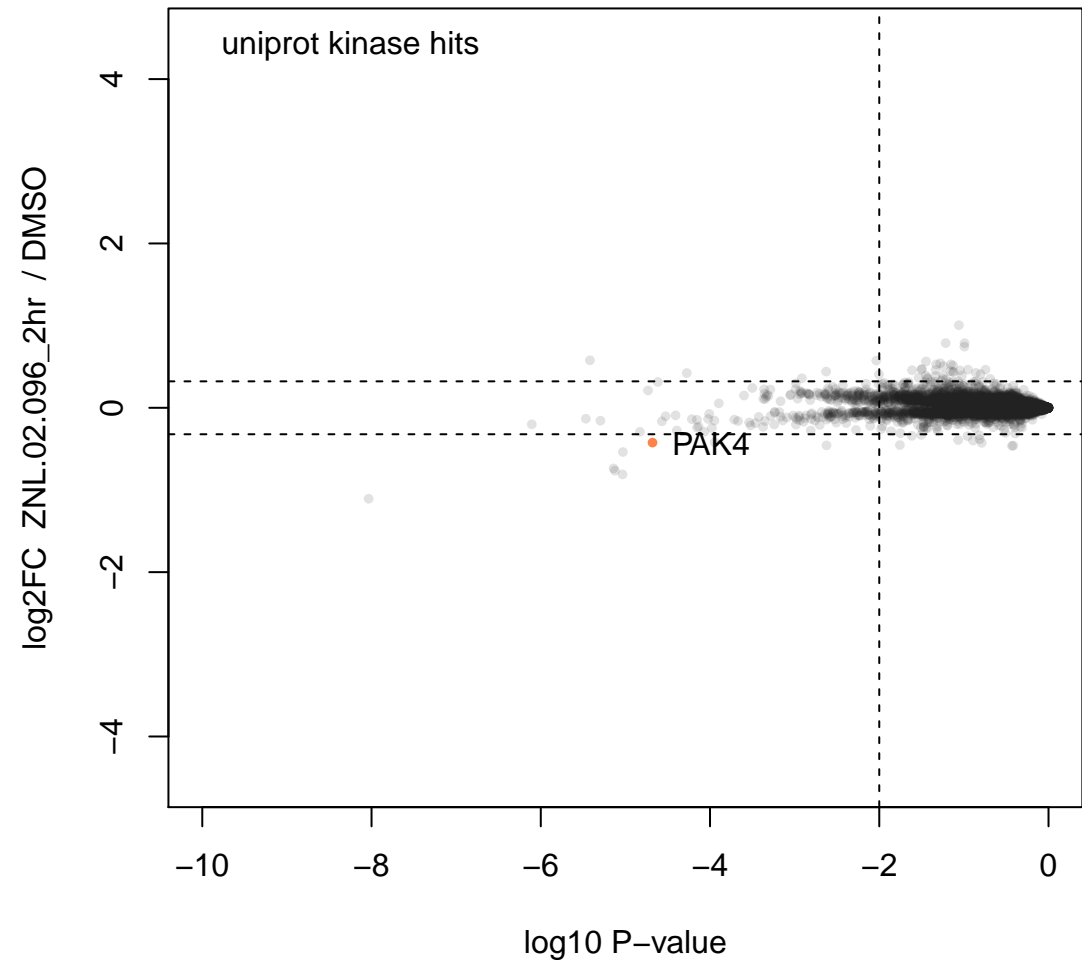

SK.3.91 (wp107)

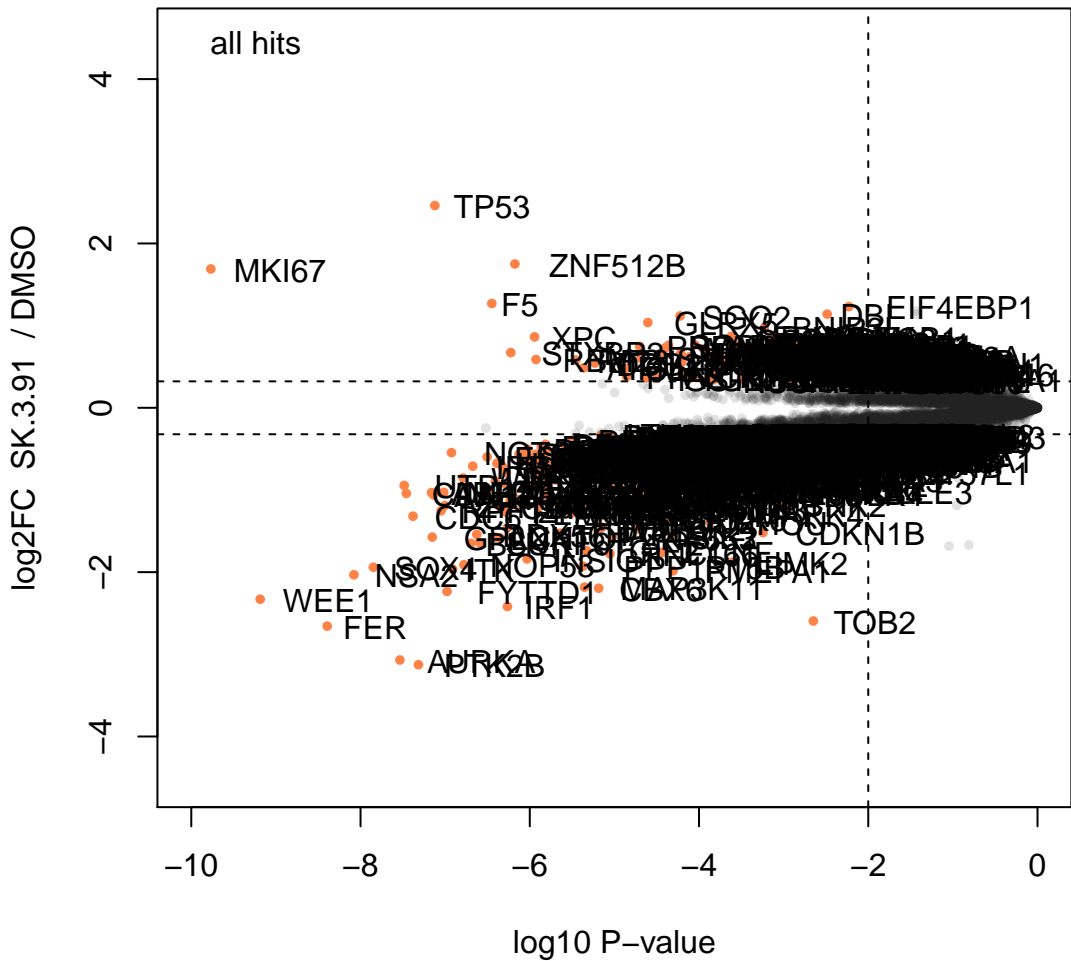

SK.3.91 (wp107)

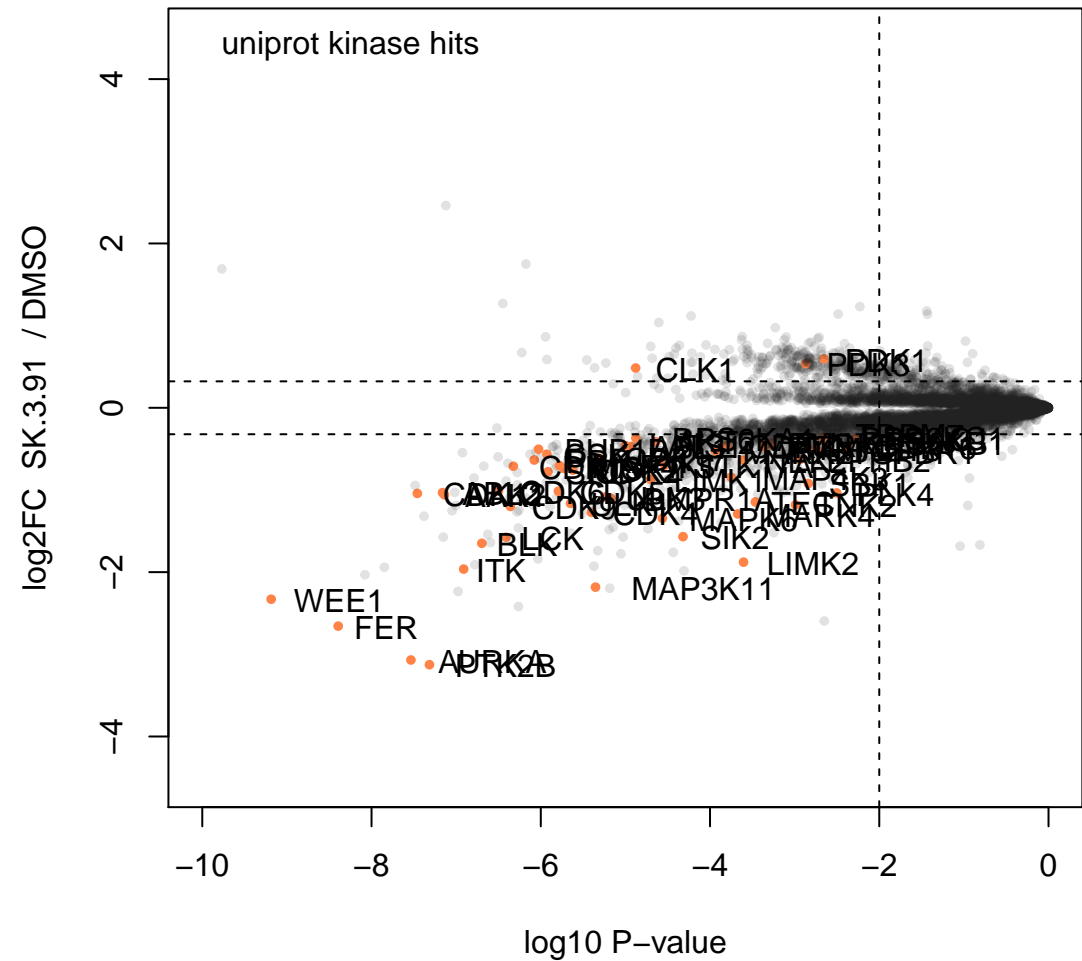





WH.10417.099 (wp107)

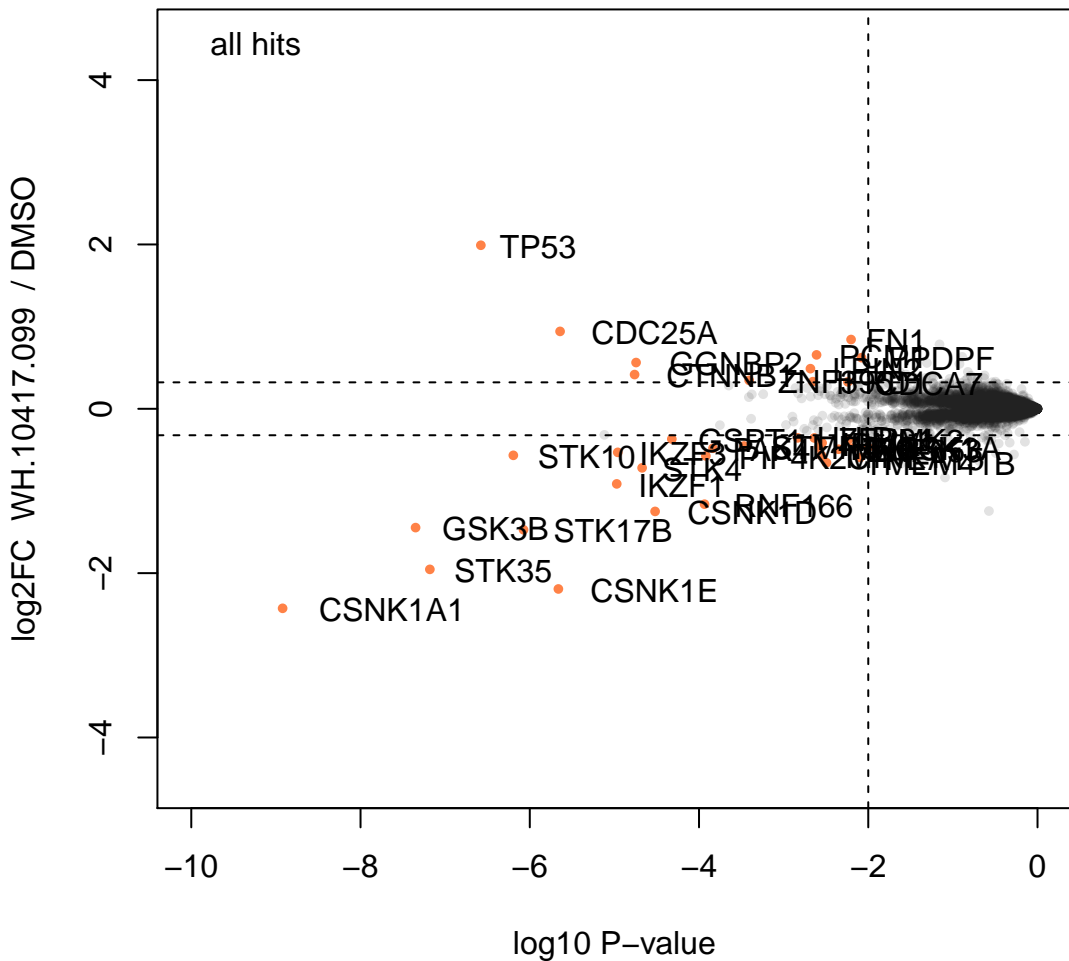

WH.10417.099 (wp107)

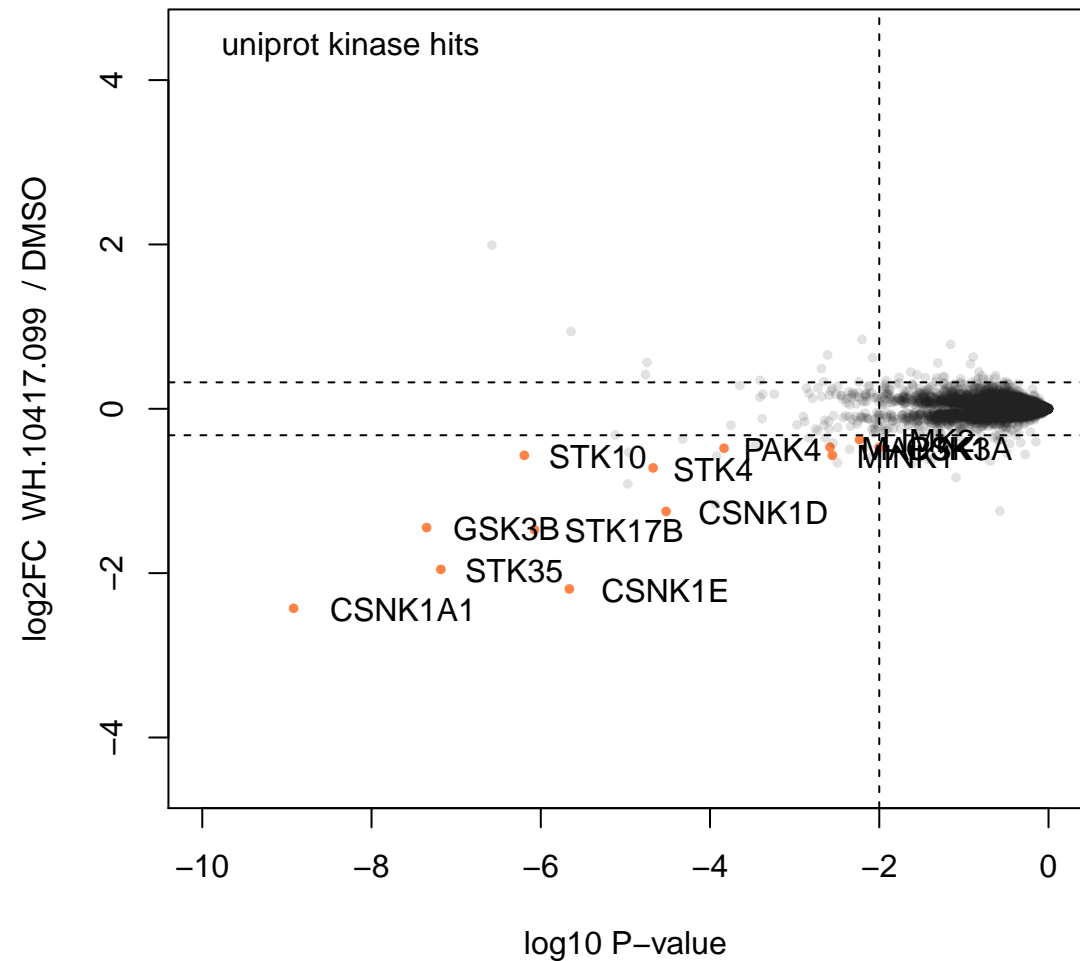

FMF.06.098.1 (wp108)

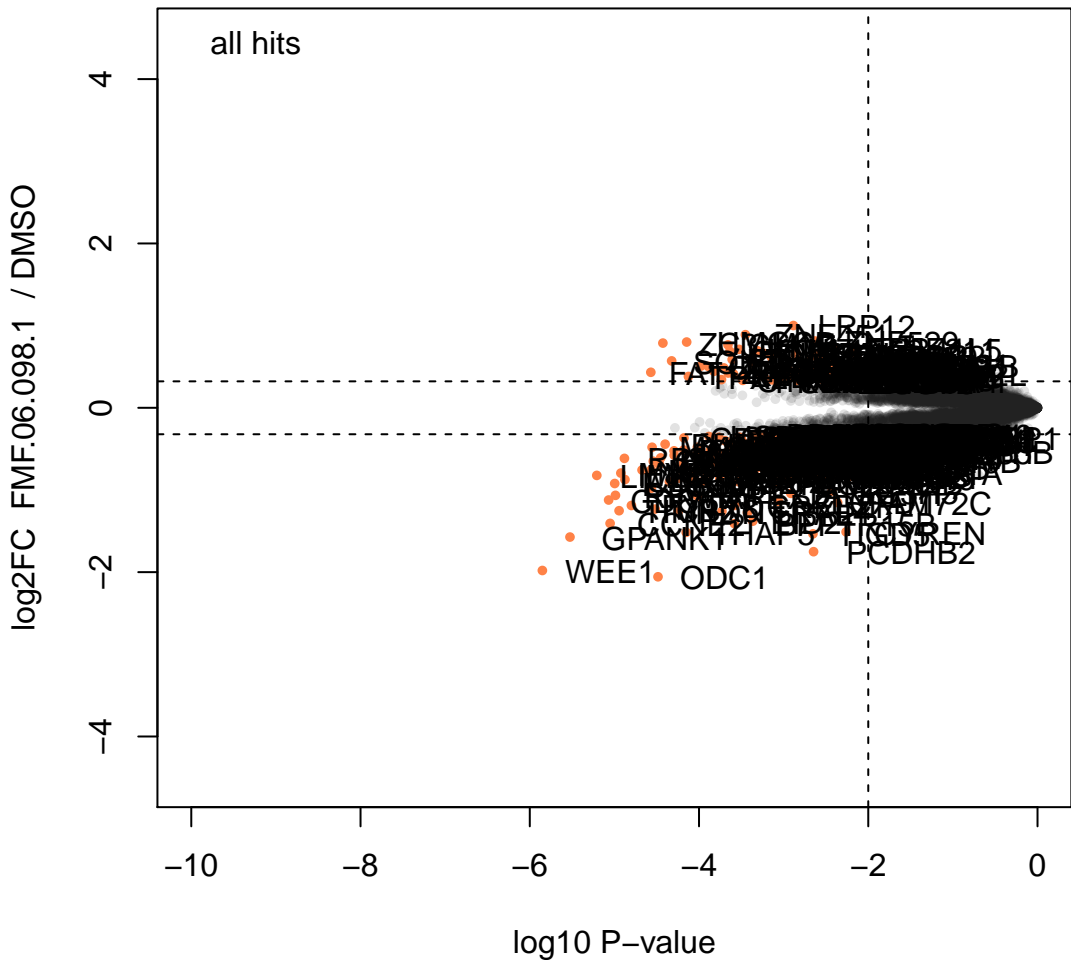

FMF.06.098.1 (wp108)

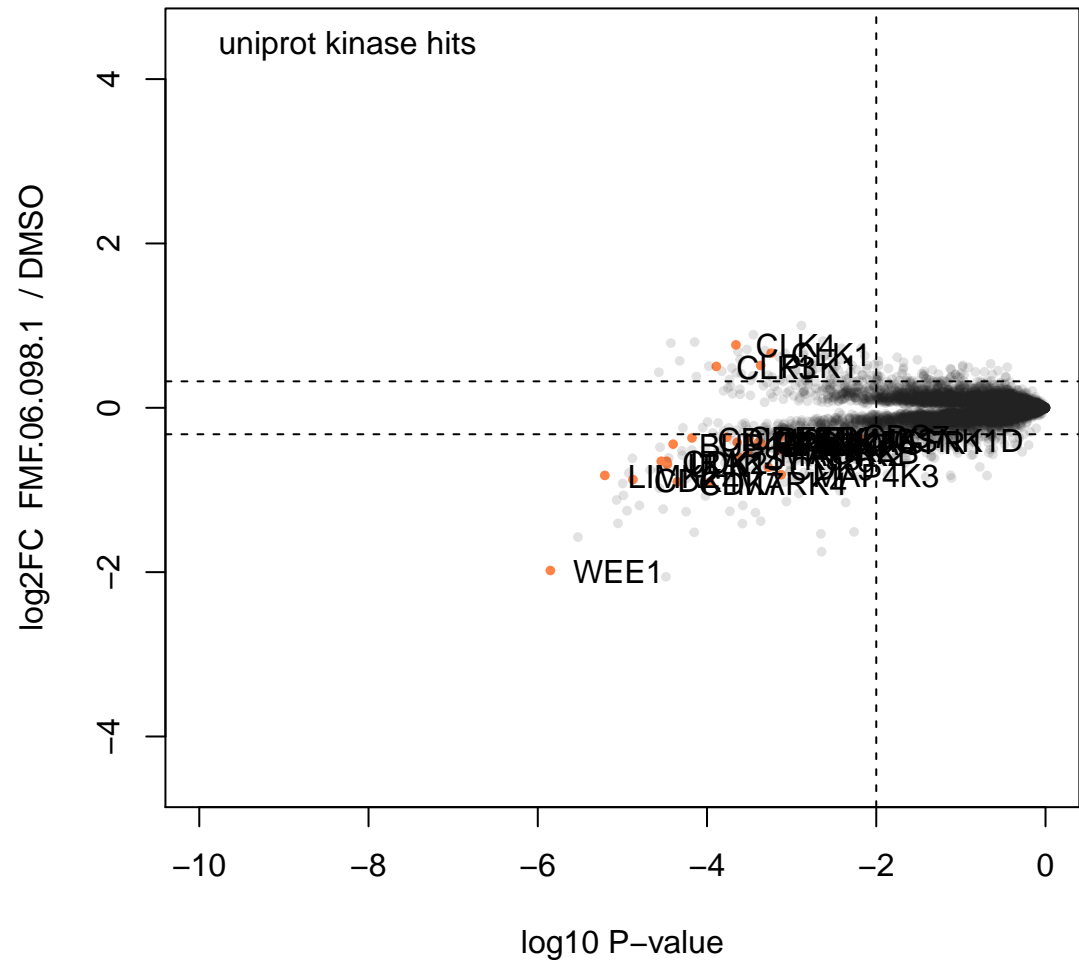



DB117034 (wp108)

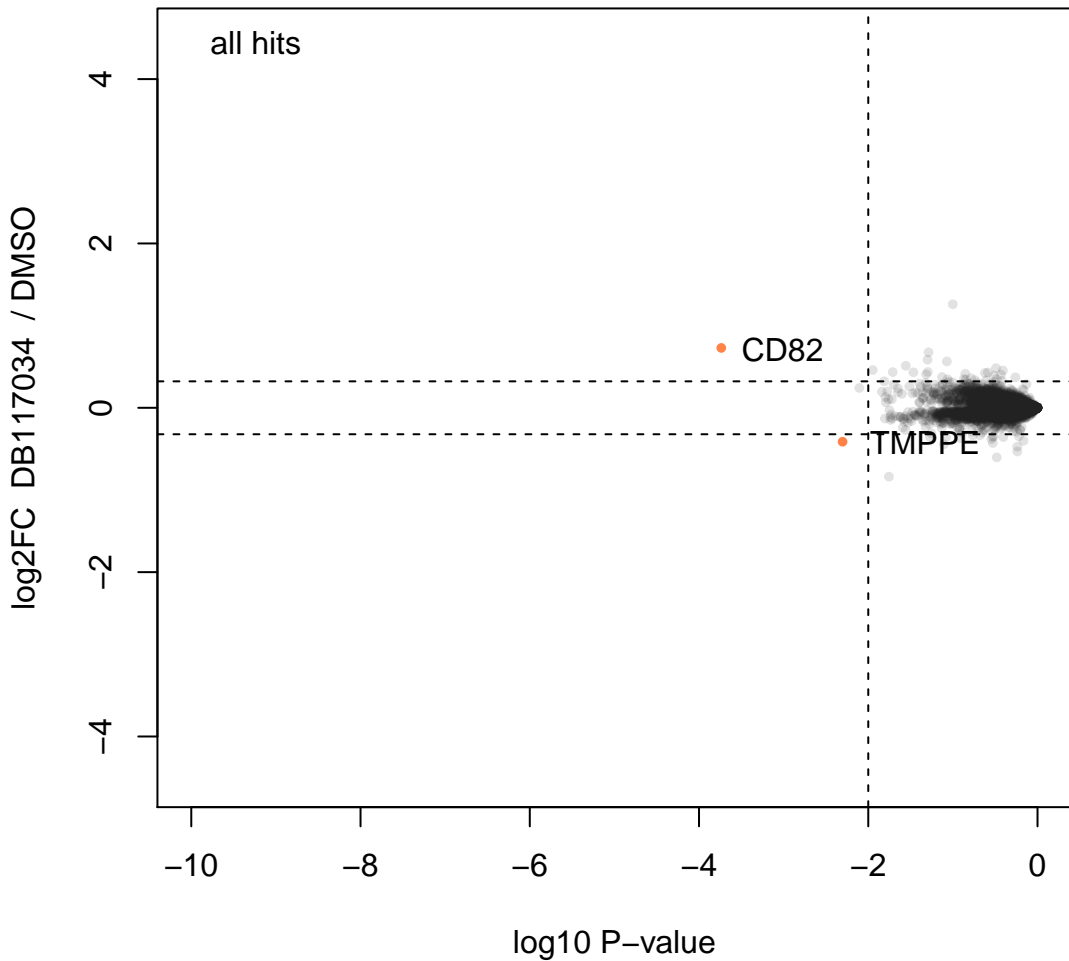

DB117034 (wp108)

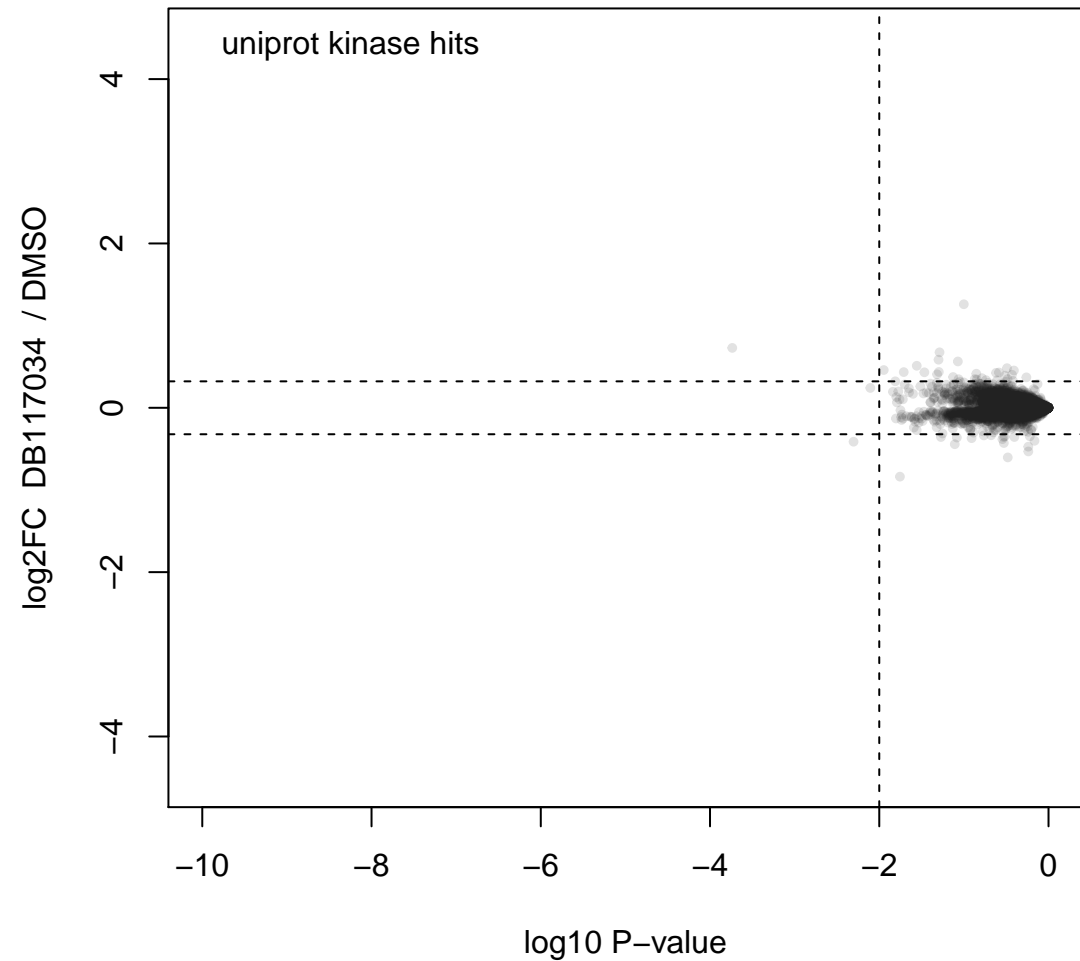

DB0646 (wp114)

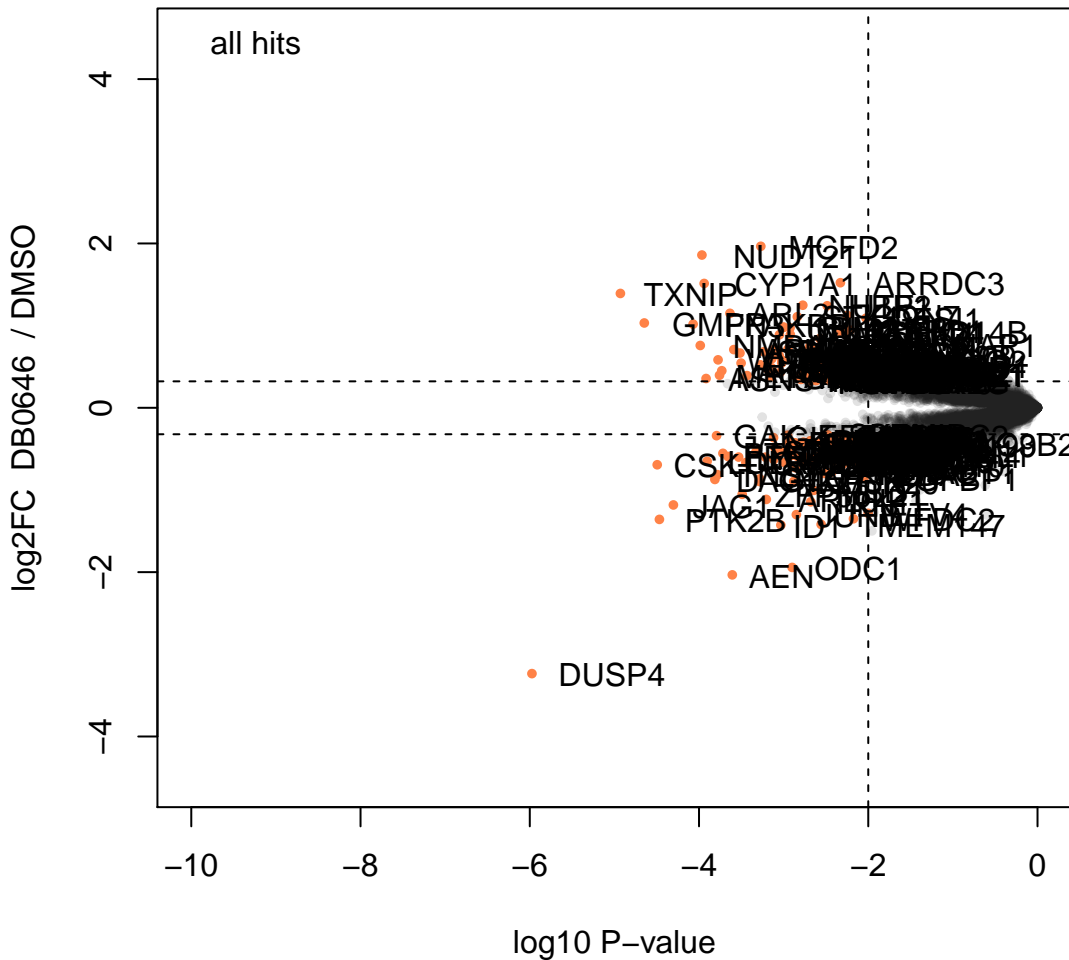

DB0646 (wp114)

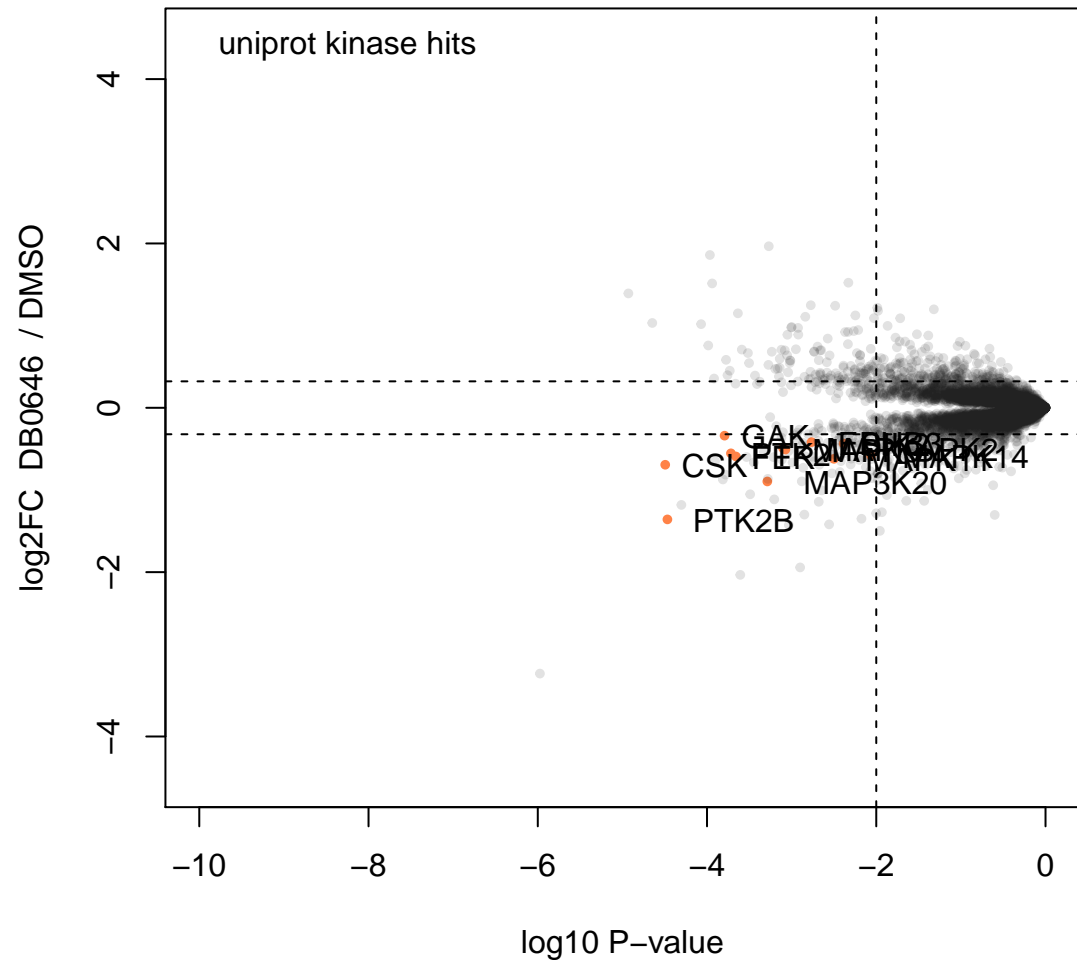

SK.3.91 (wp114)

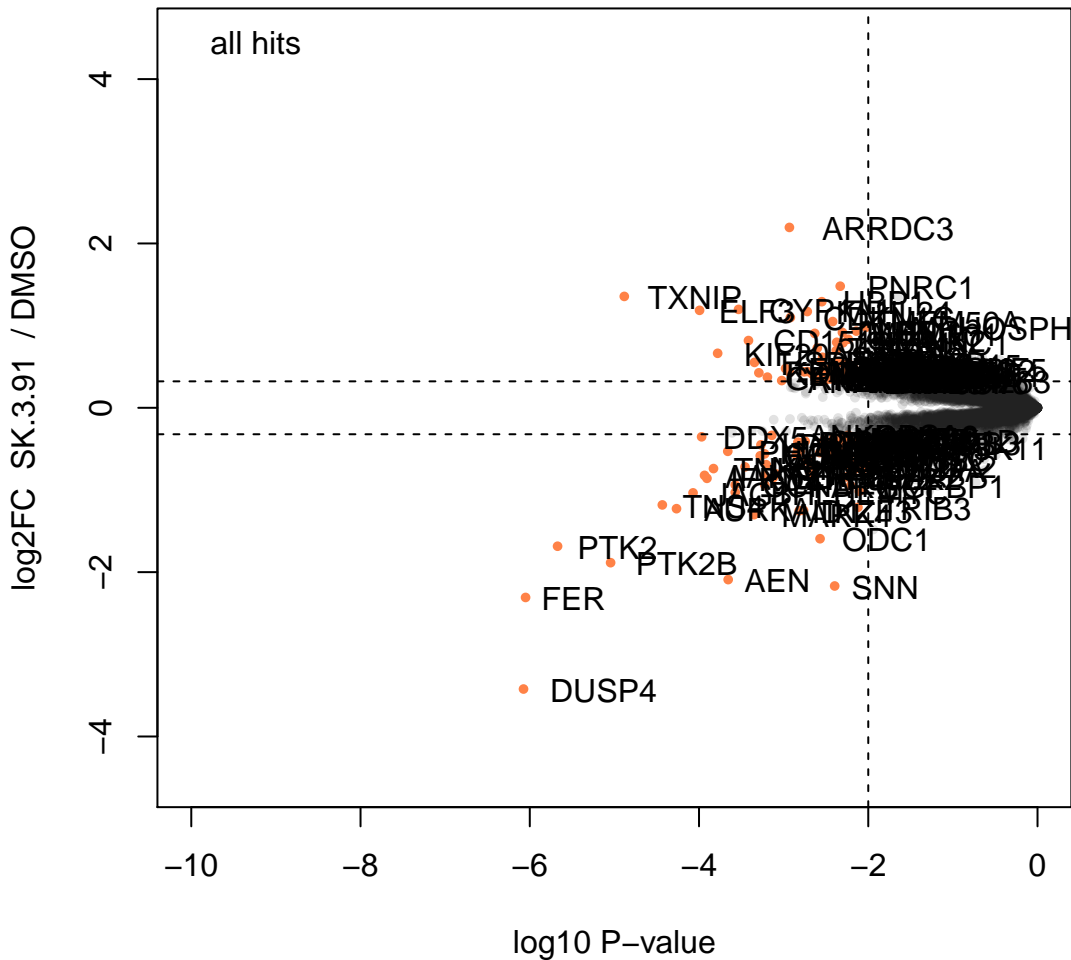

SK.3.91 (wp114)

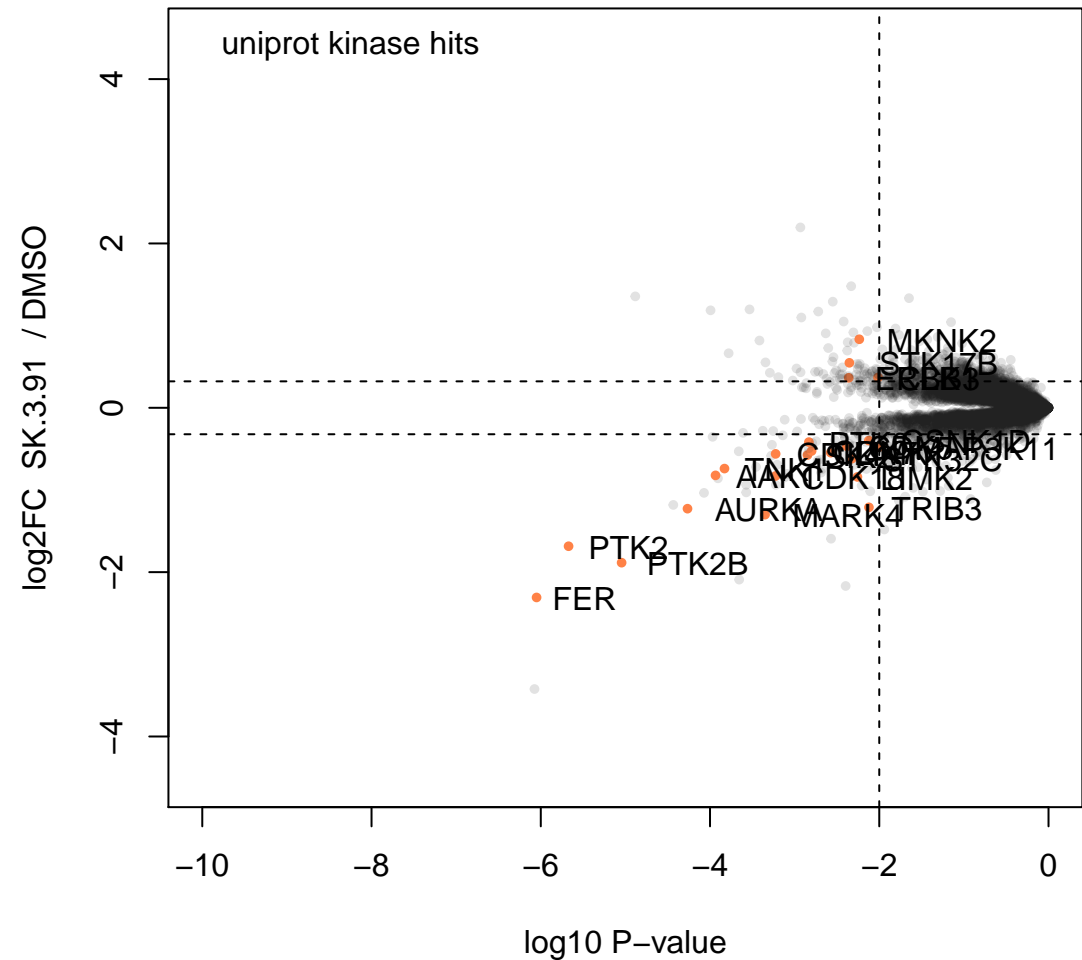

WH.10414.099 (wp114)

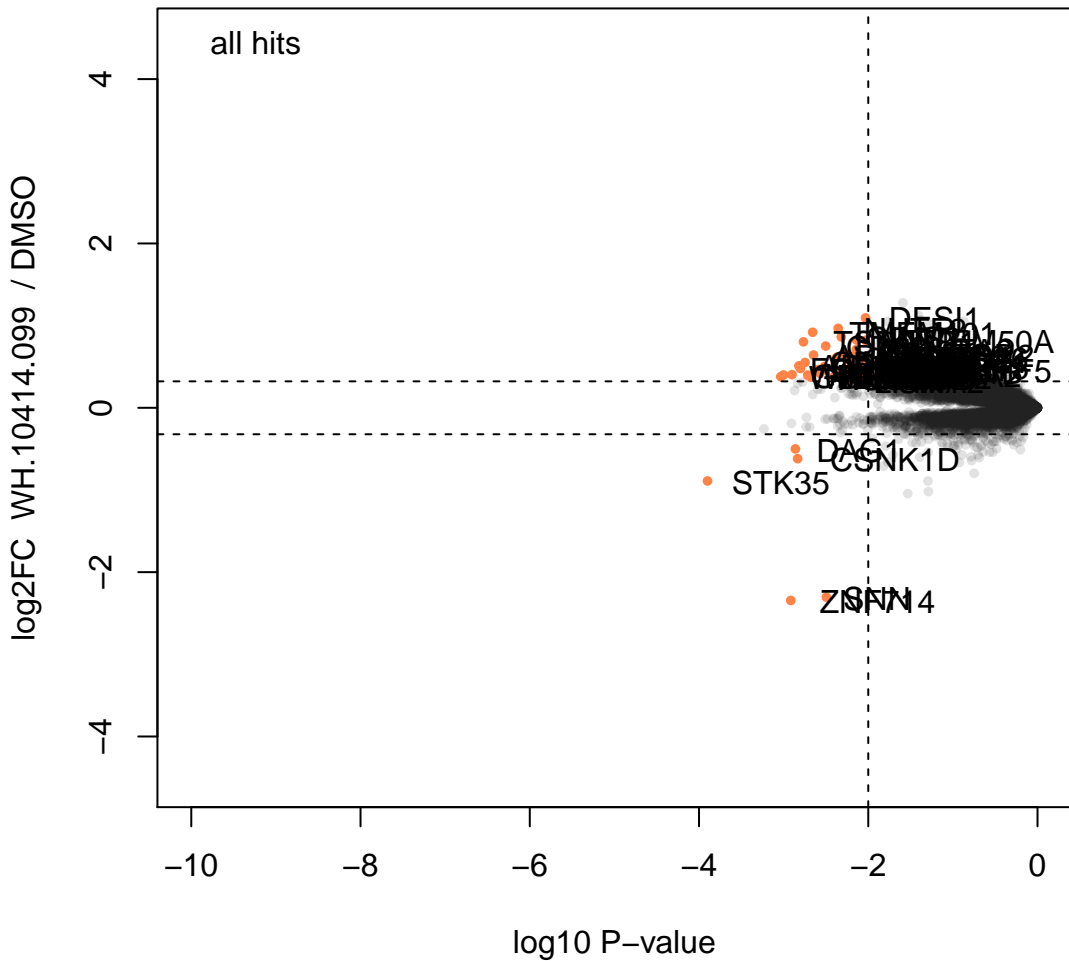

WH.10414.099 (wp114)

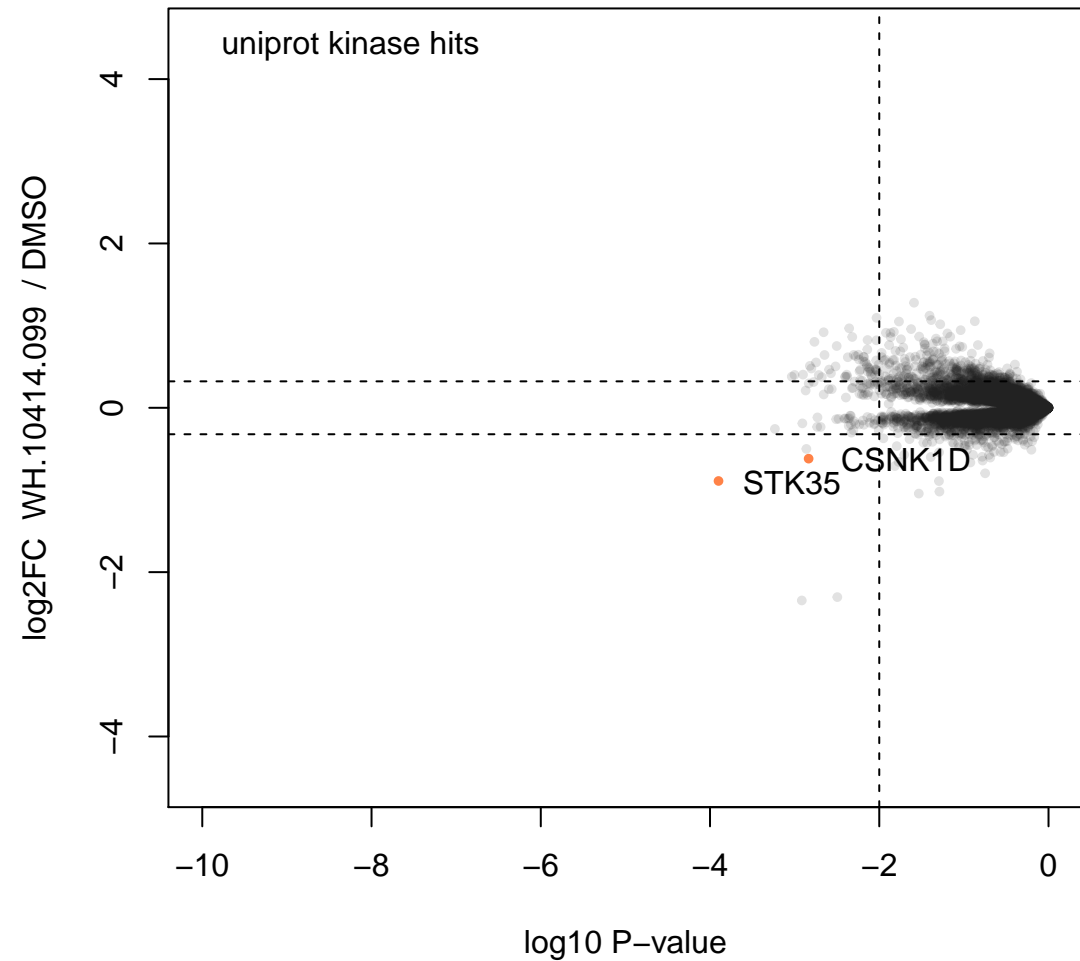

SB1.G.187 (wp114)

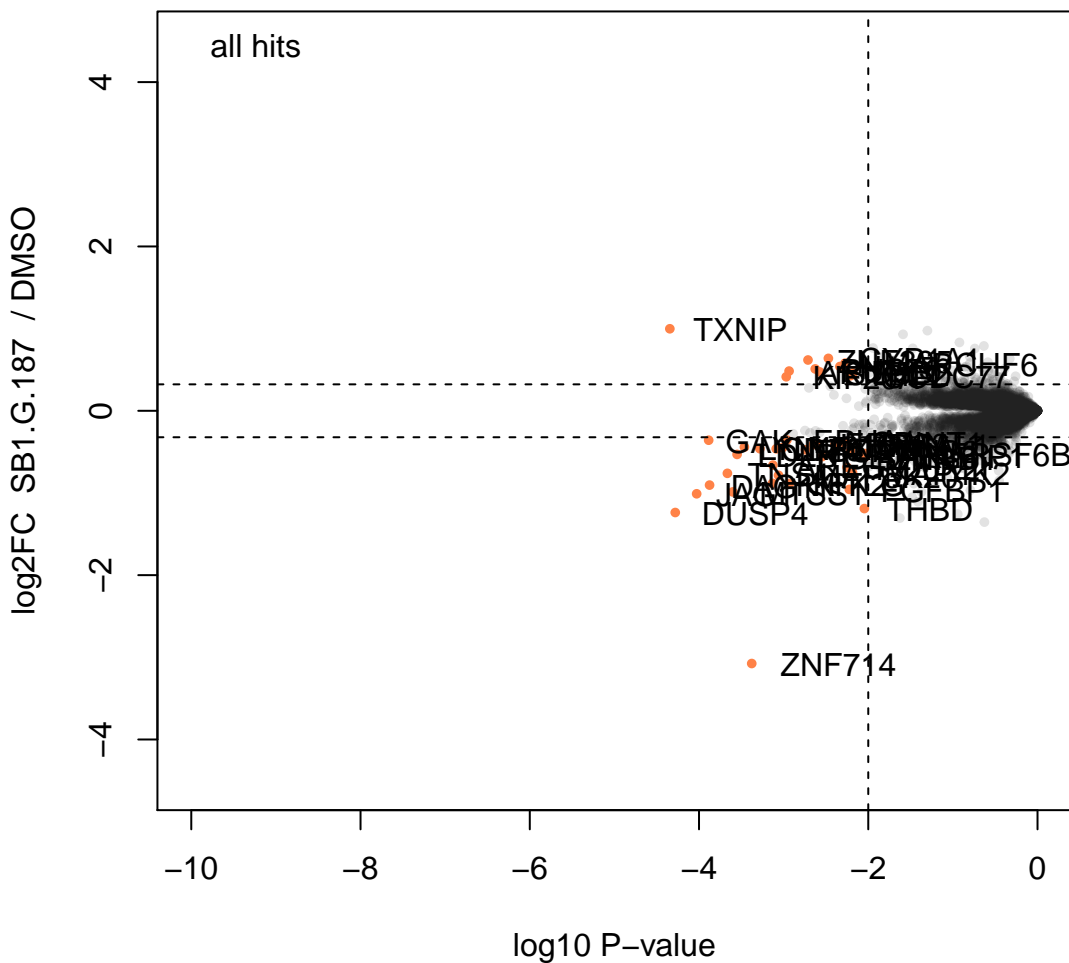

SB1.G.187 (wp114)

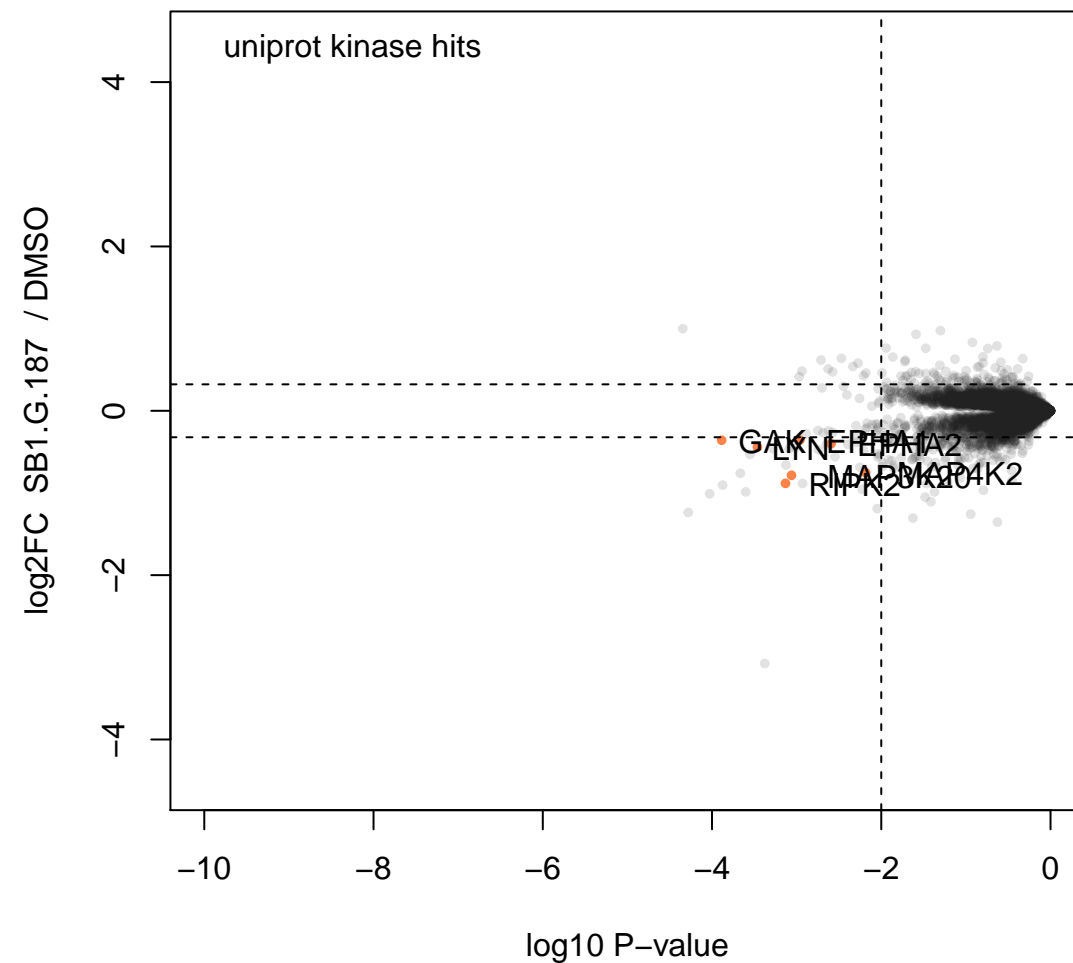

FMF.06.098.1 (wp114)

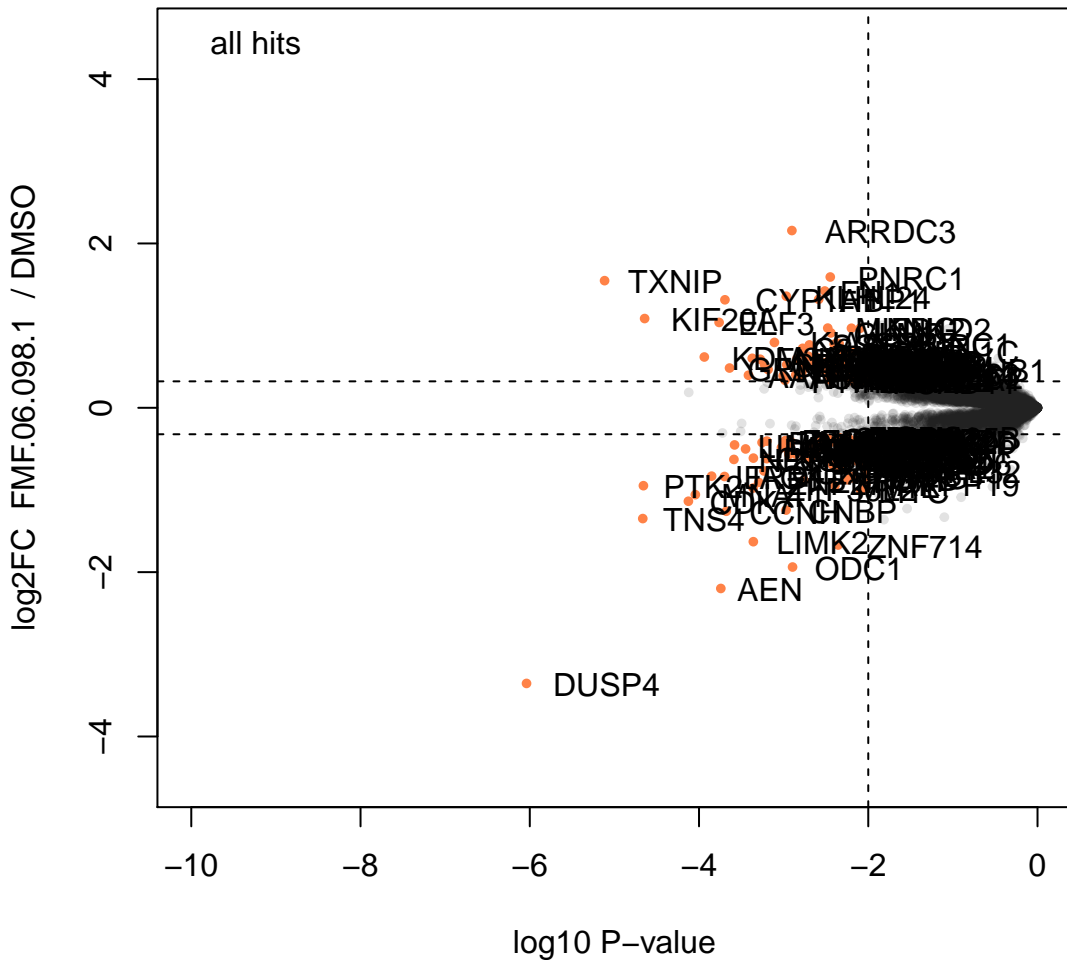

FMF.06.098.1 (wp114)

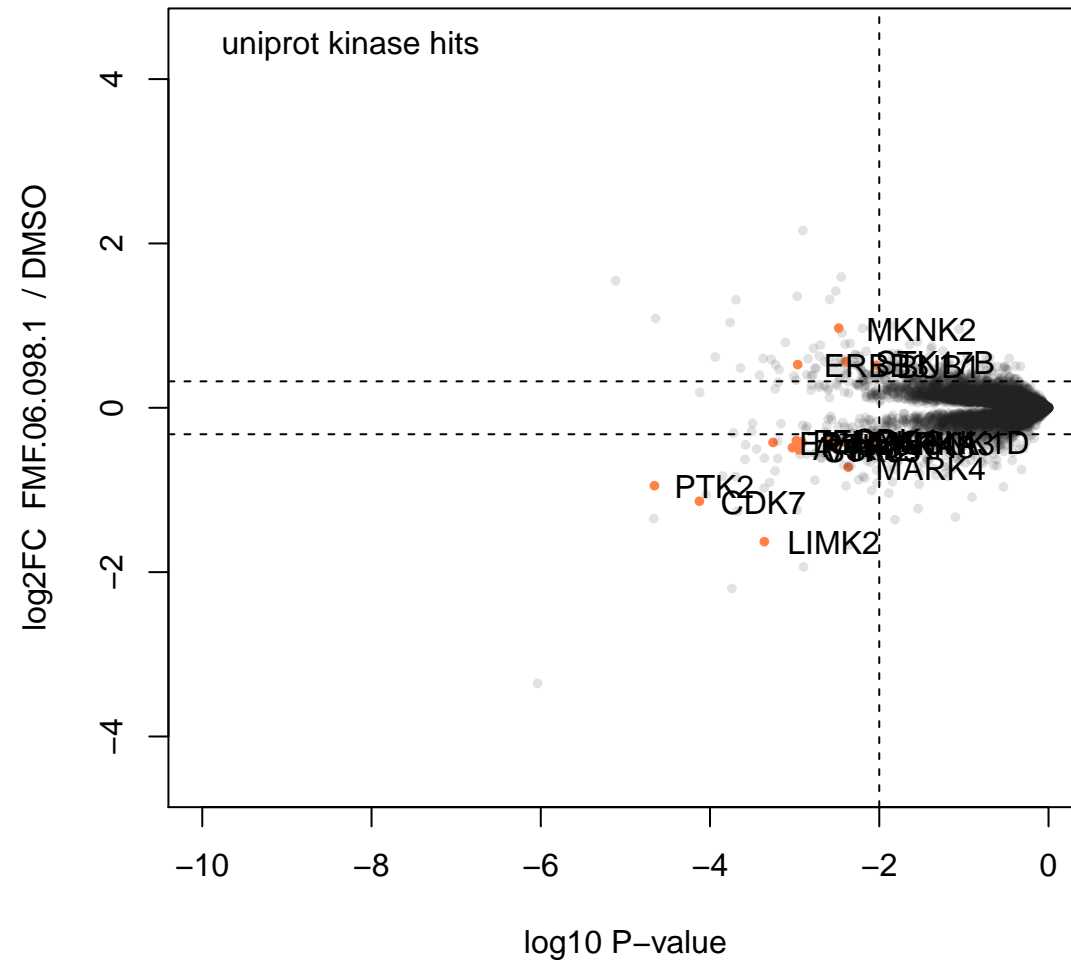

RSS0680 (wp117)

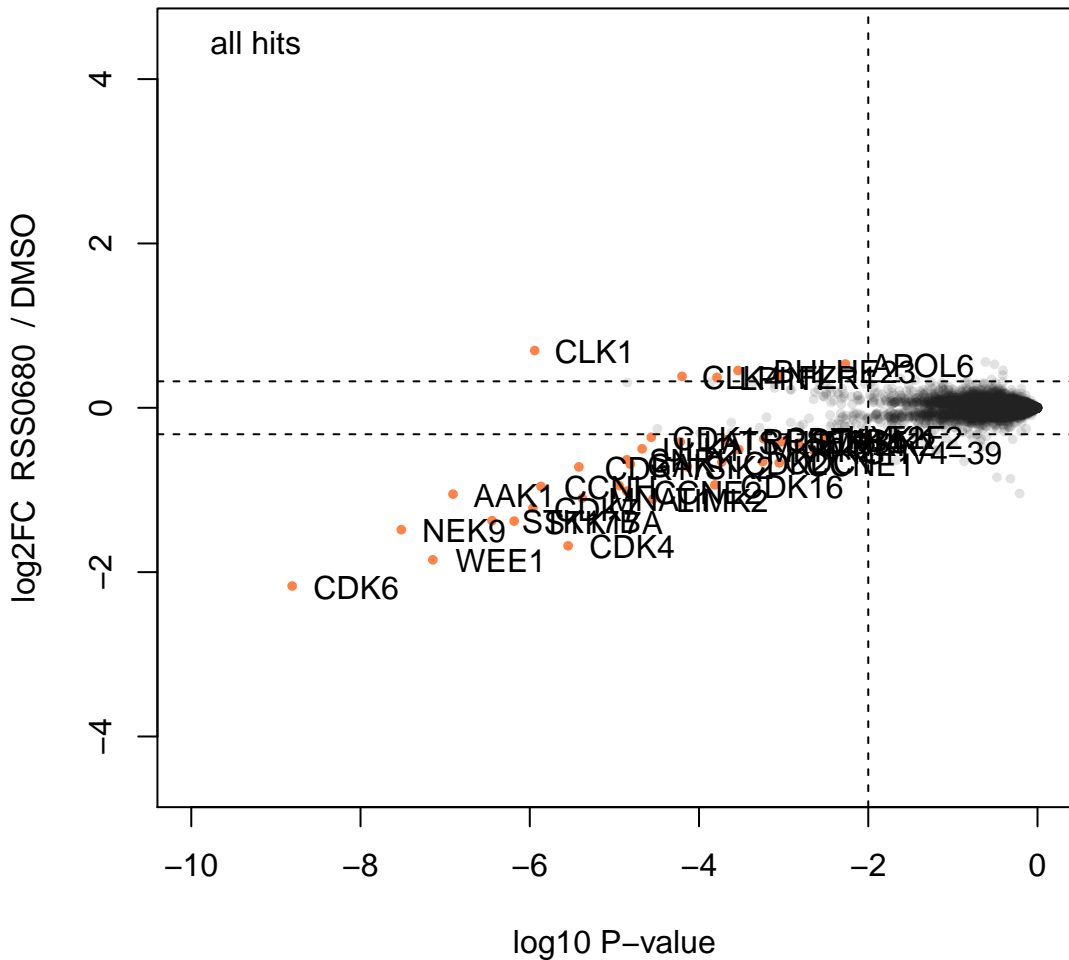

RSS0680 (wp117)

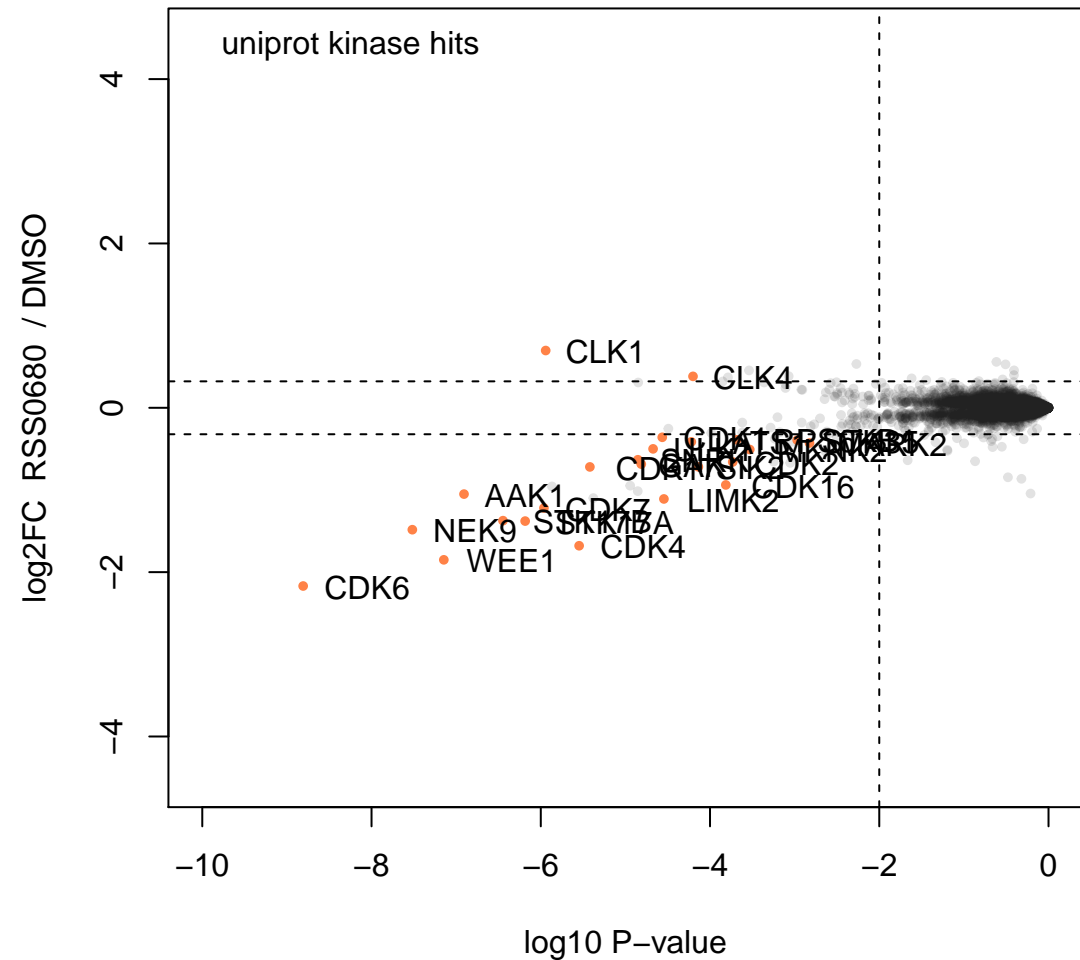

DB0614 (wp117)

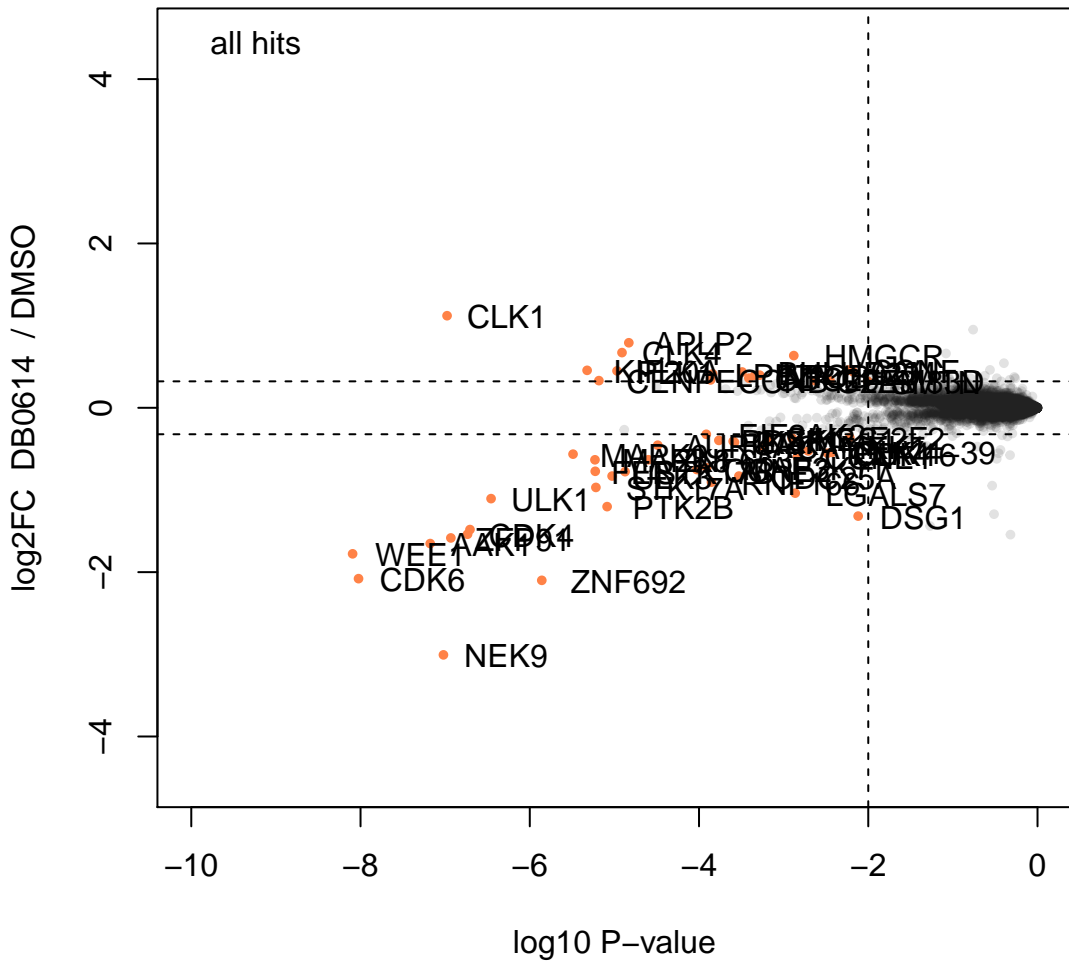

DB0614 (wp117)

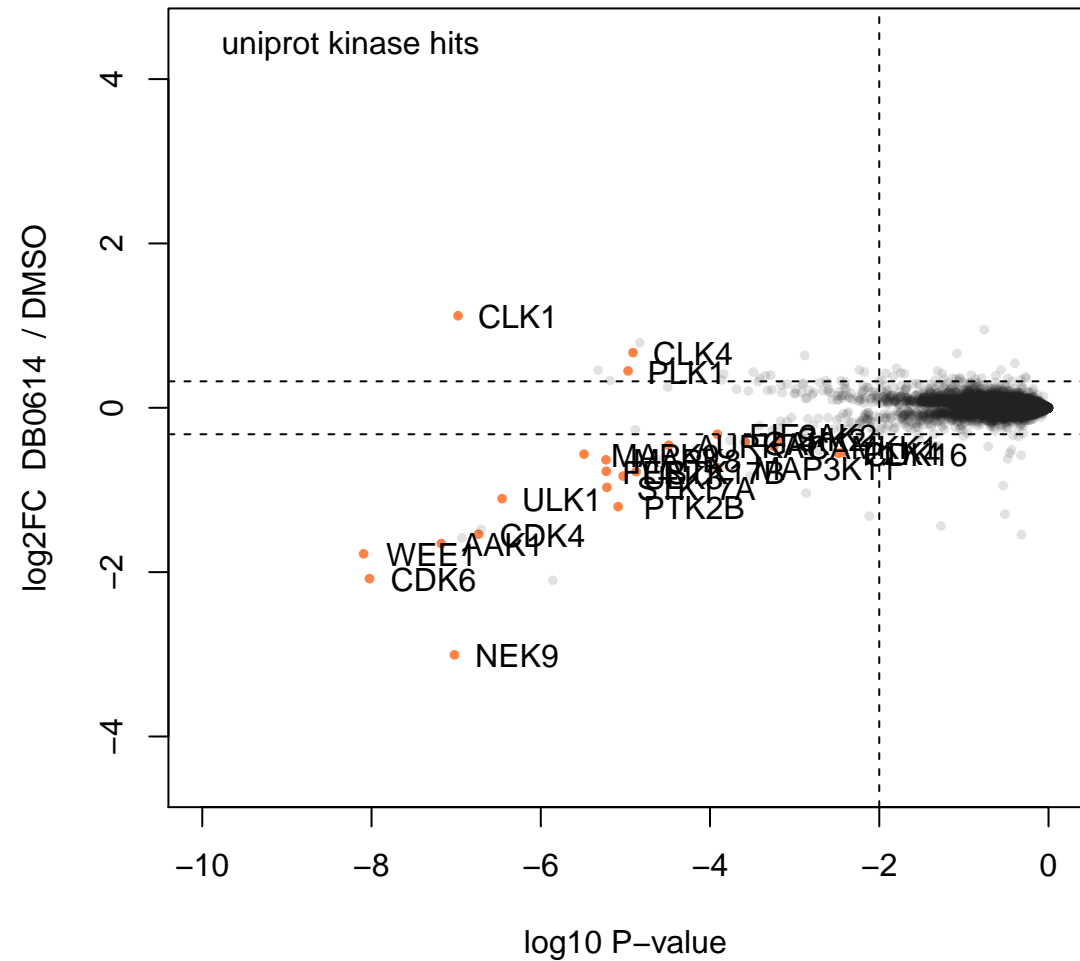



DB0646 (wp117)

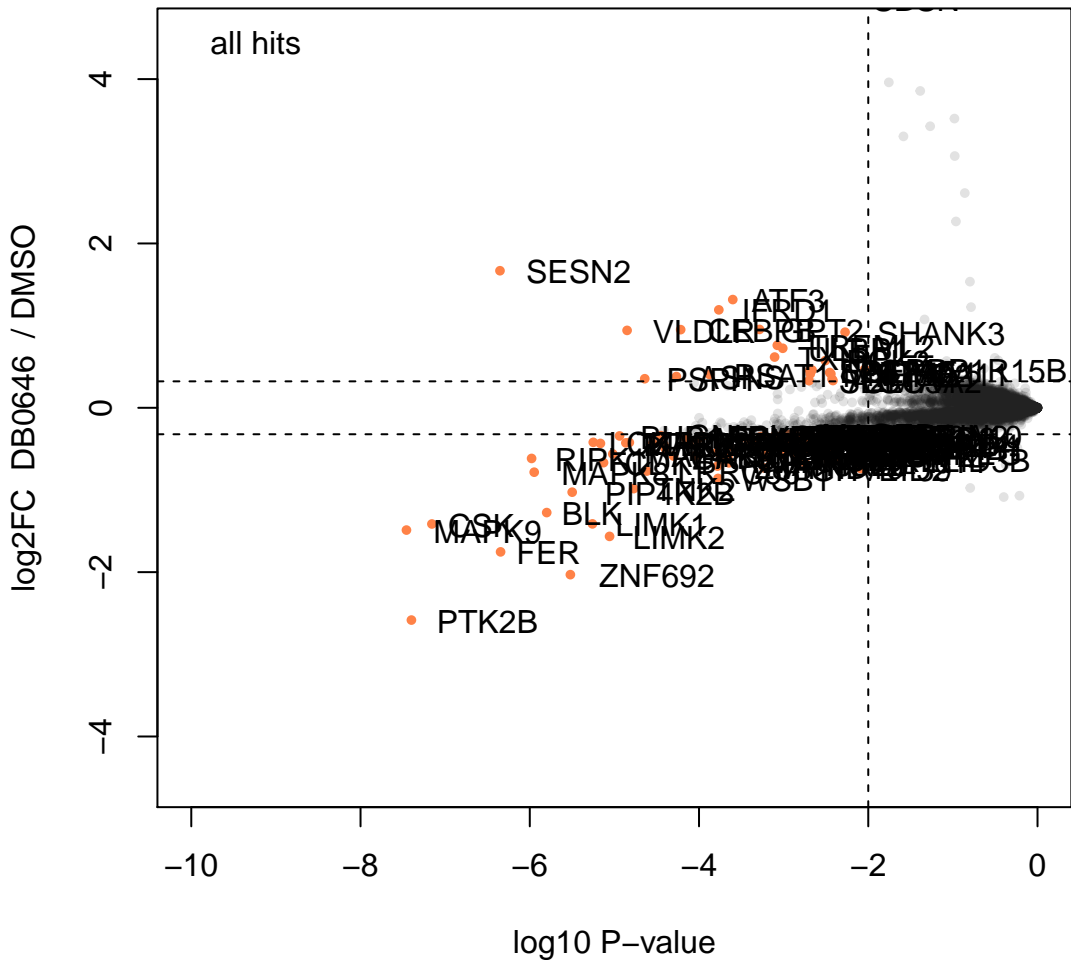

DB0646 (wp117)

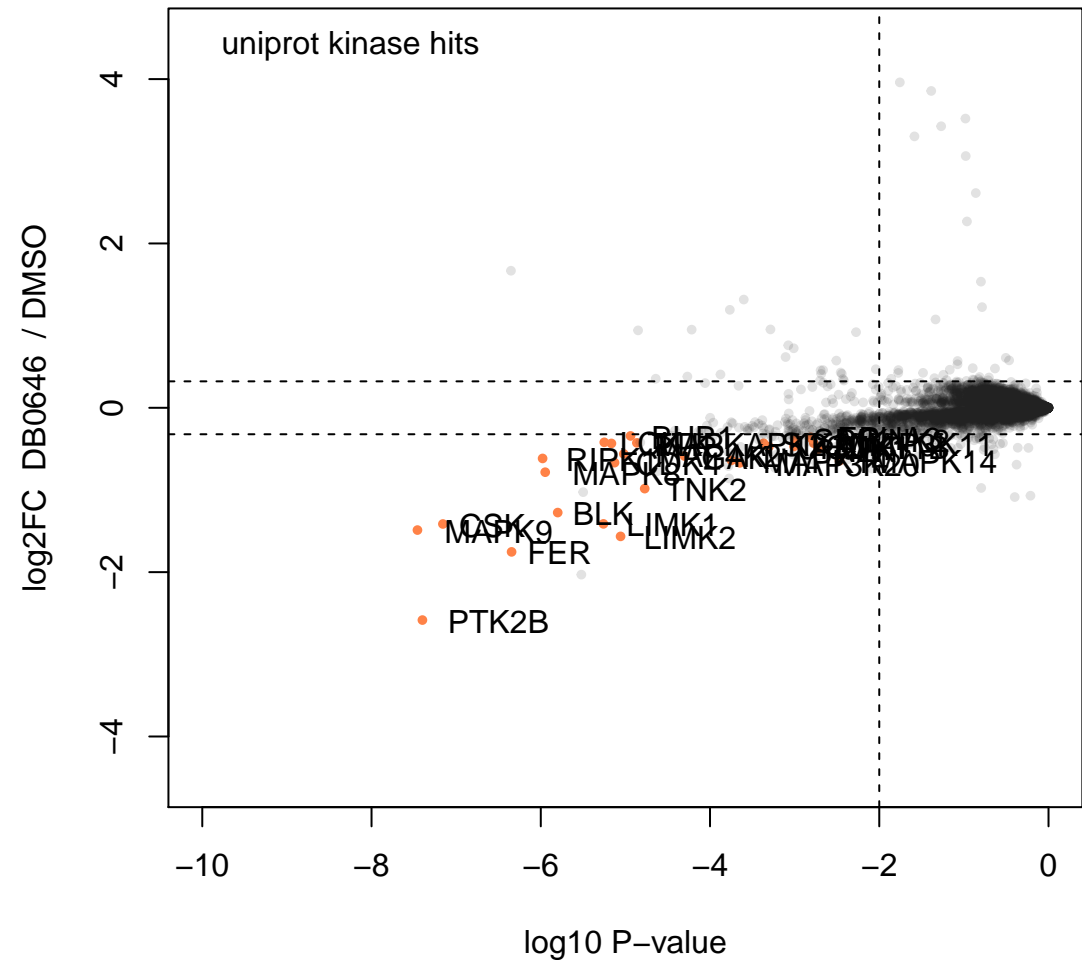

INY.03.041.01 (wp118)

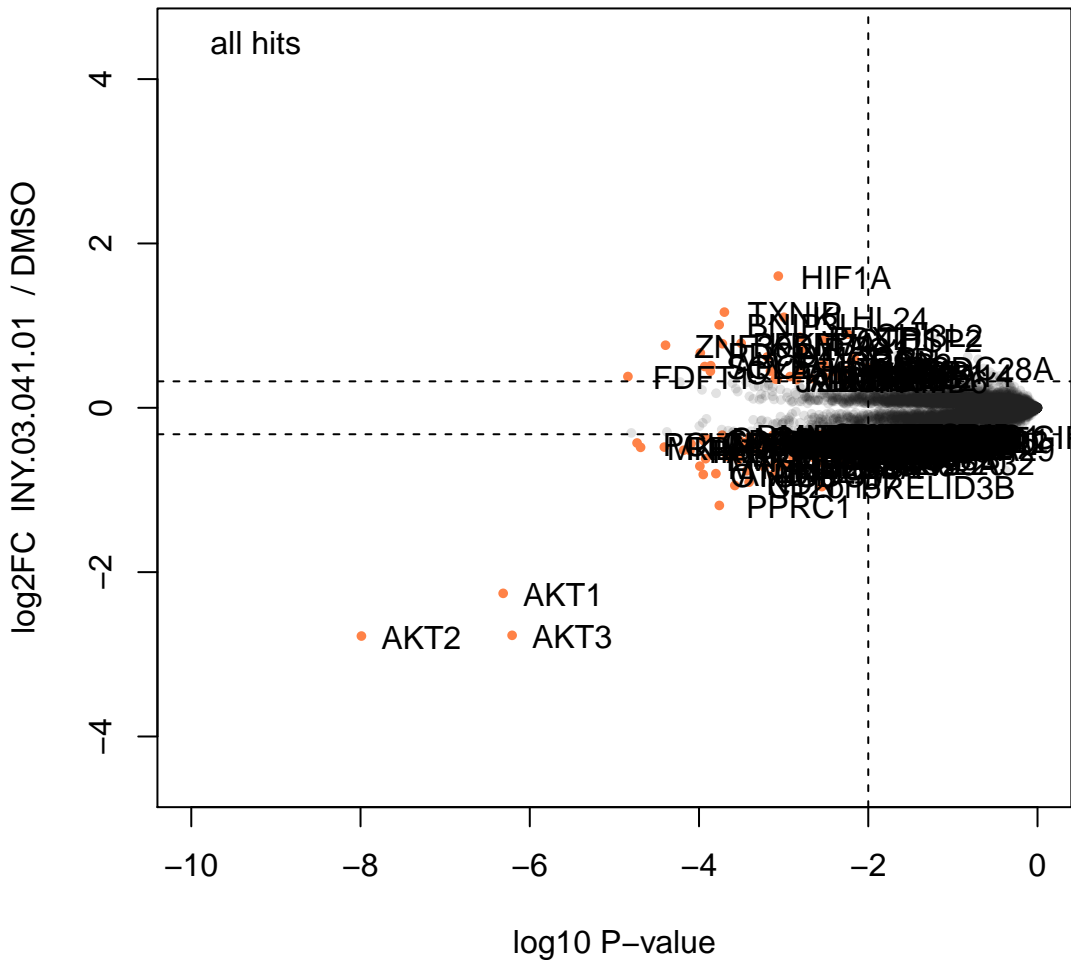

INY.03.041.01 (wp118)

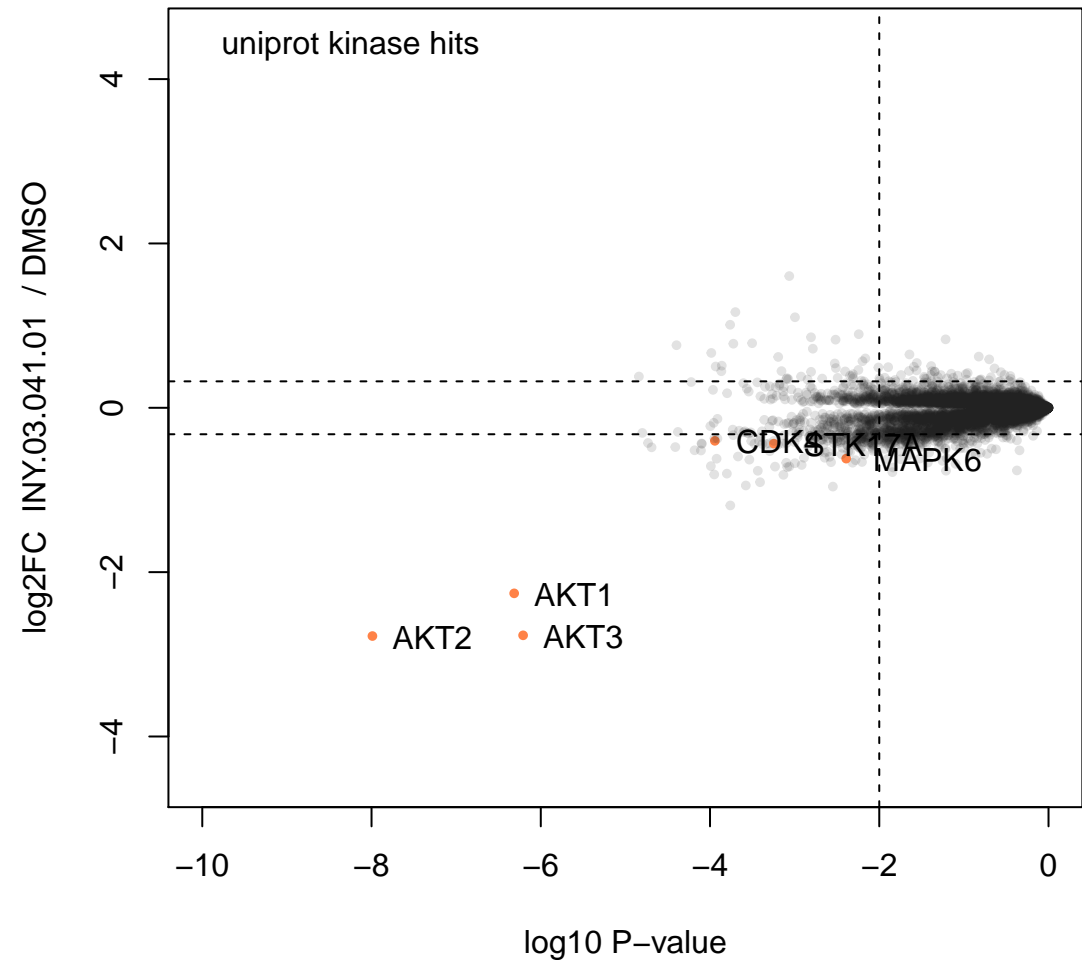

ZNL.02.096 (wp118)

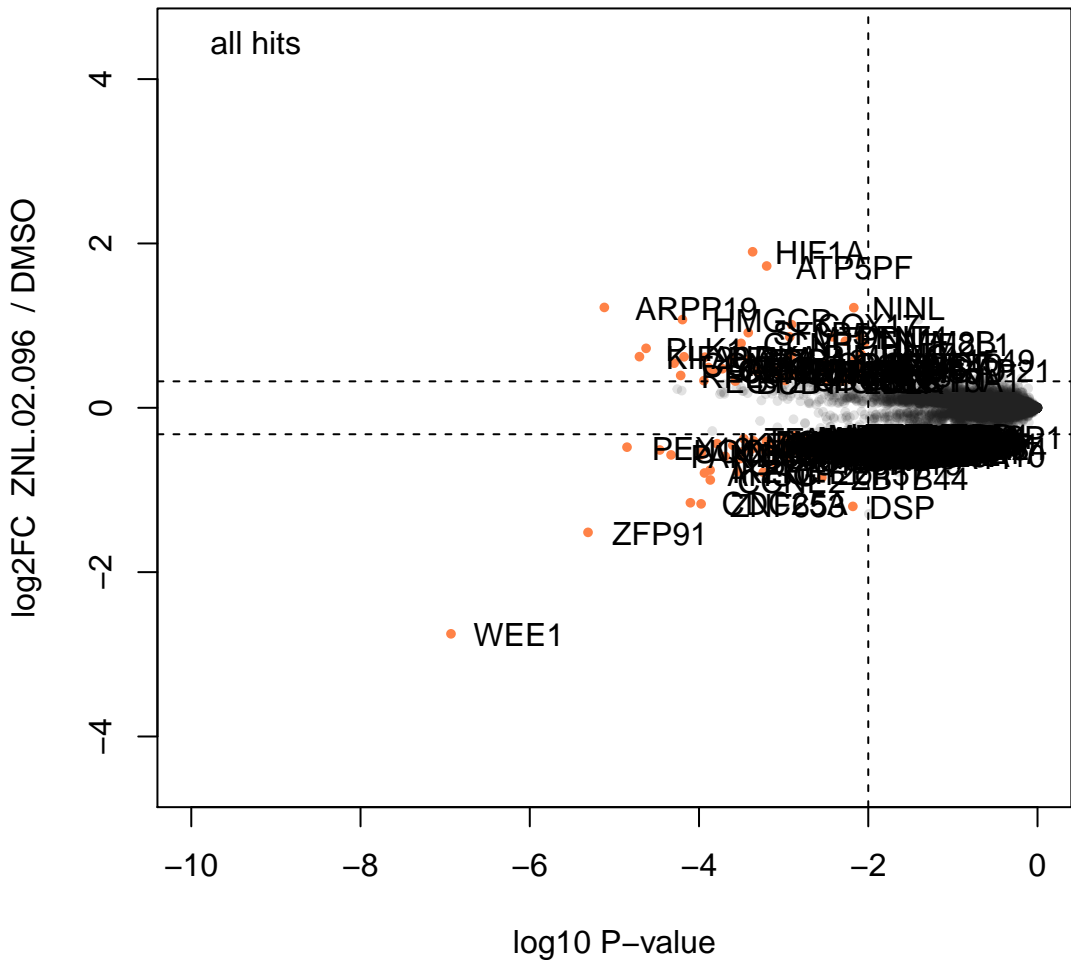

ZNL.02.096 (wp118)

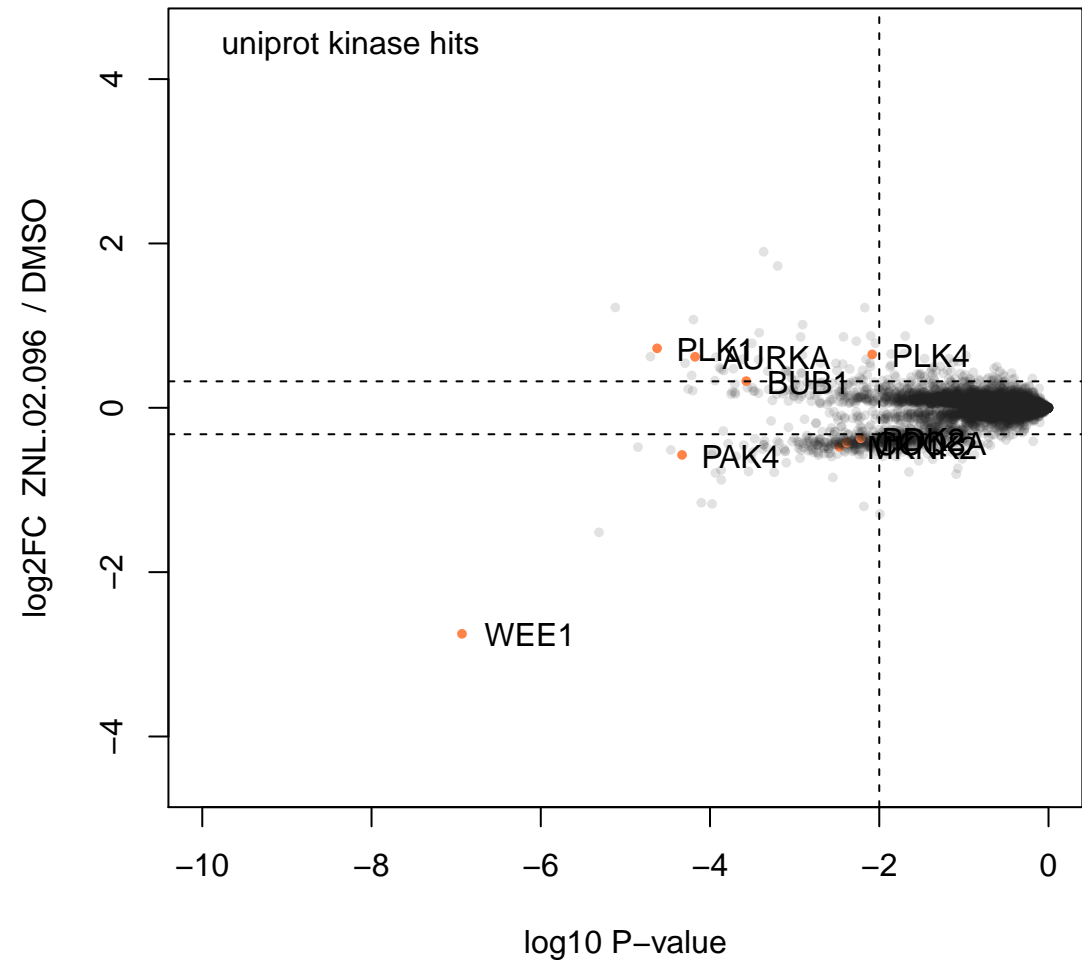

FMF06.098.1 (wp131)

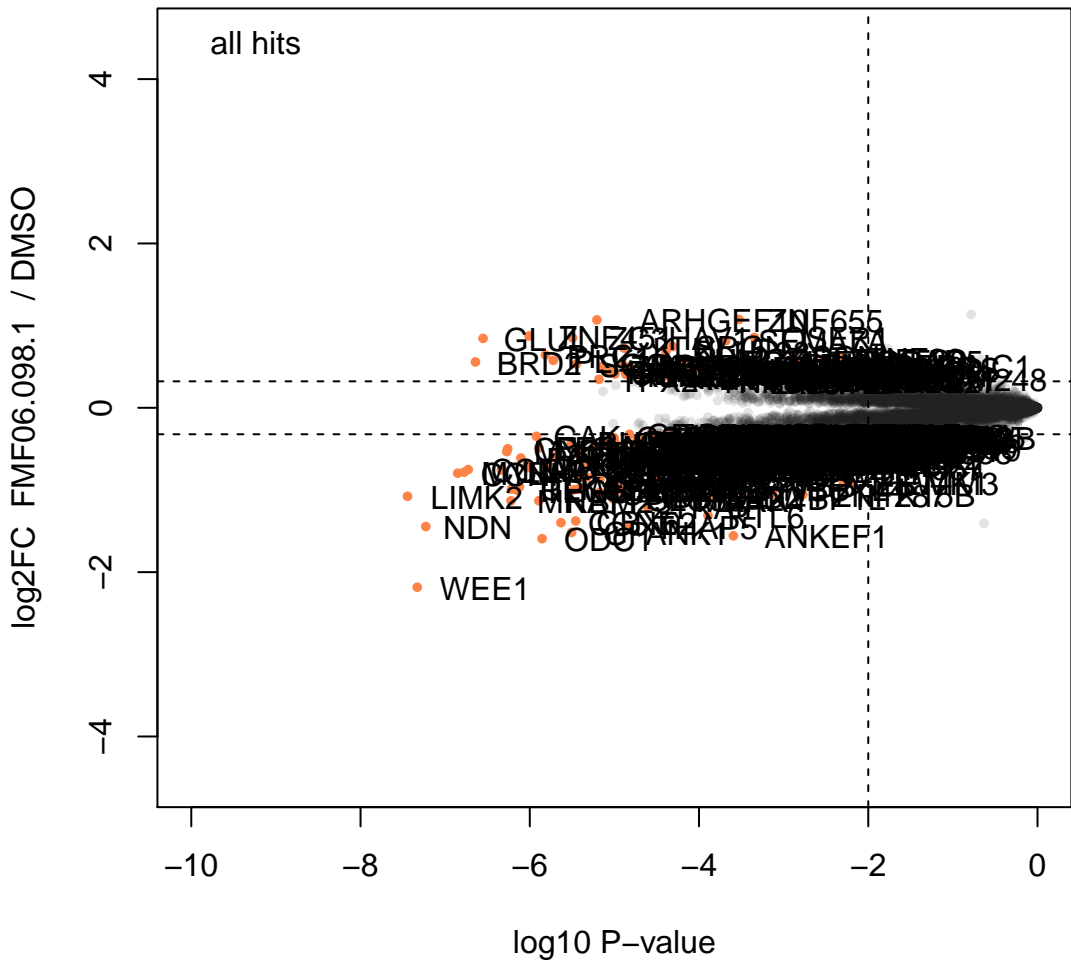

FMF06.098.1 (wp131)

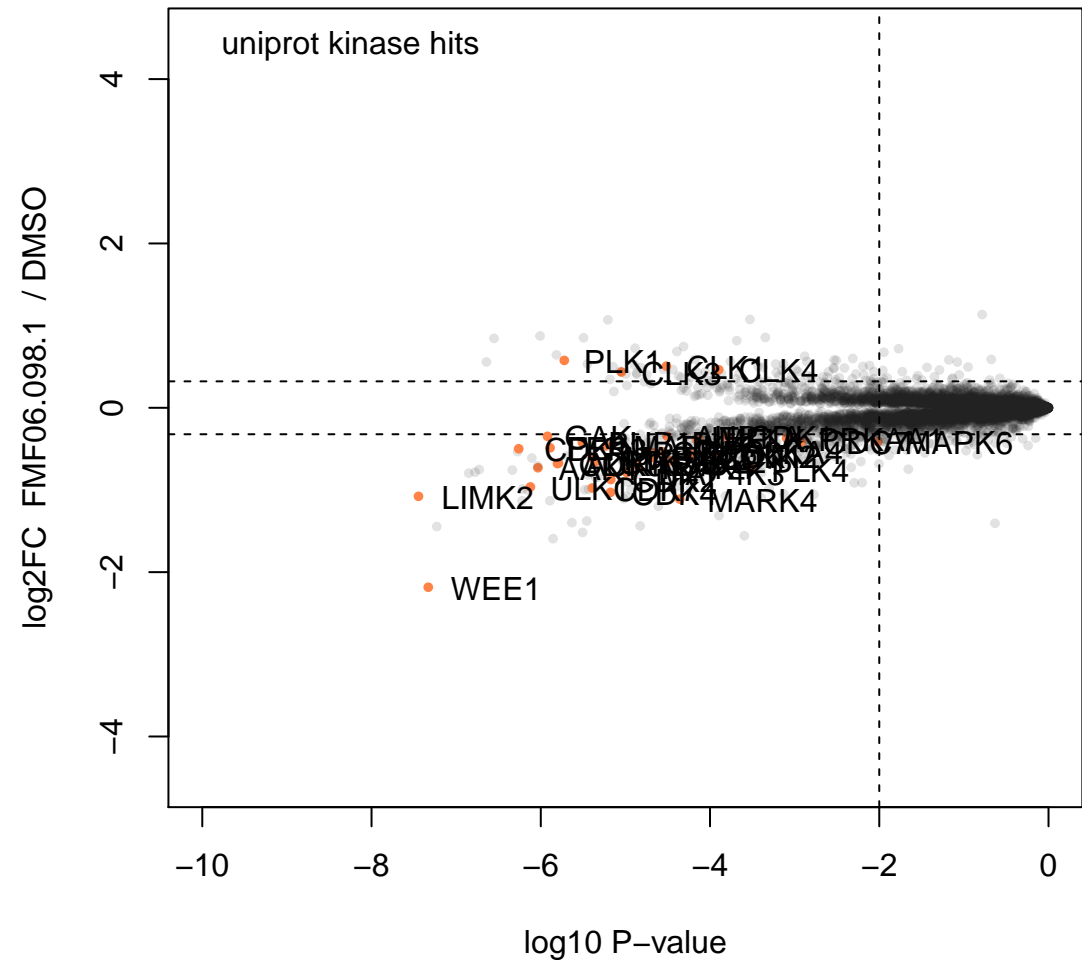



SB1.G.192.1 (wp131)

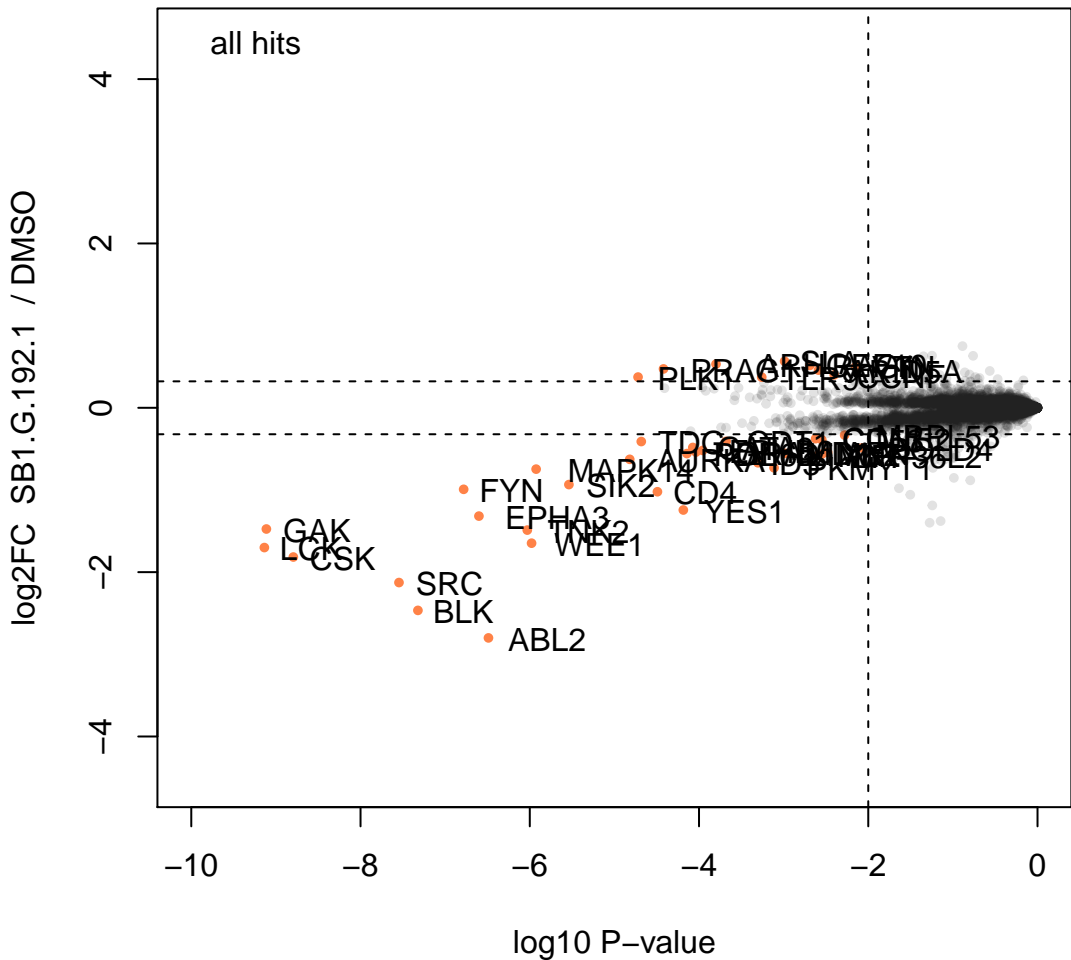

SB1.G.192.1 (wp131)

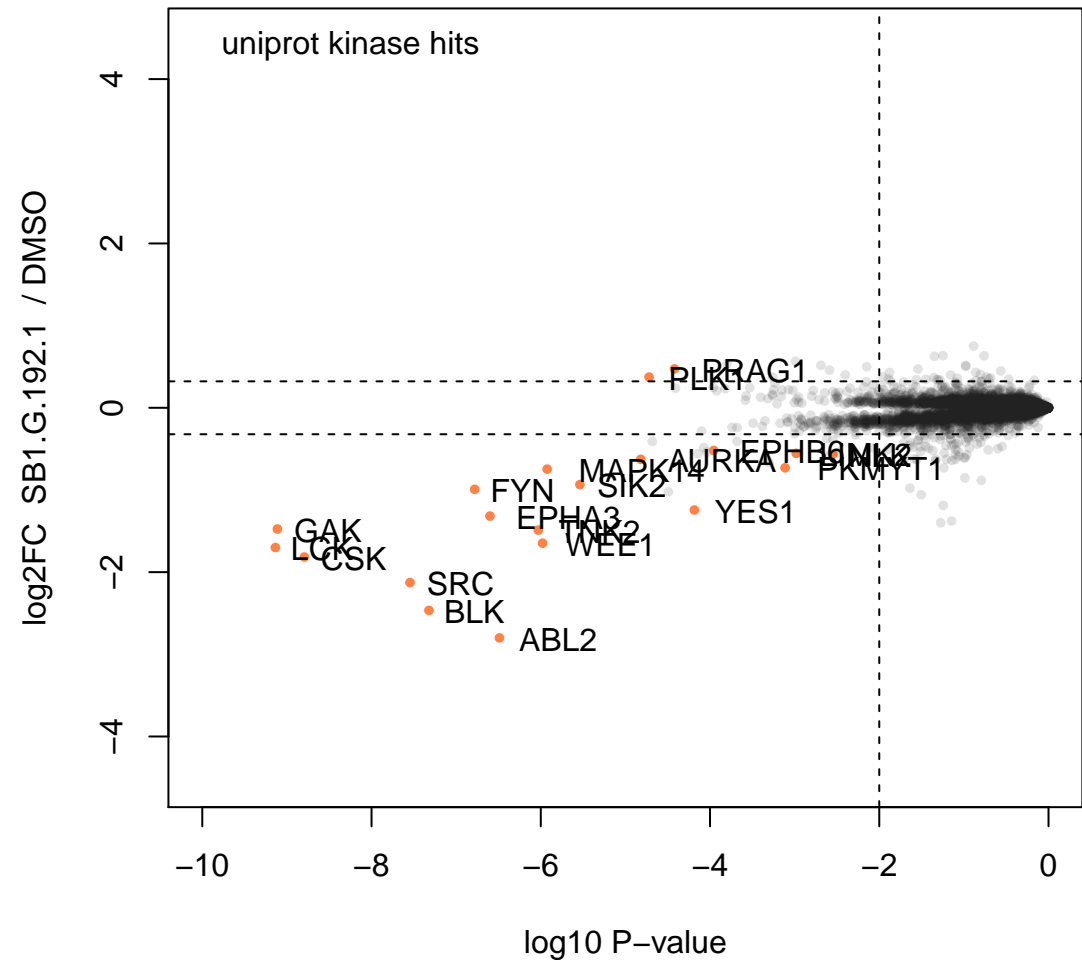

FMF.06.104.1 (wp131)

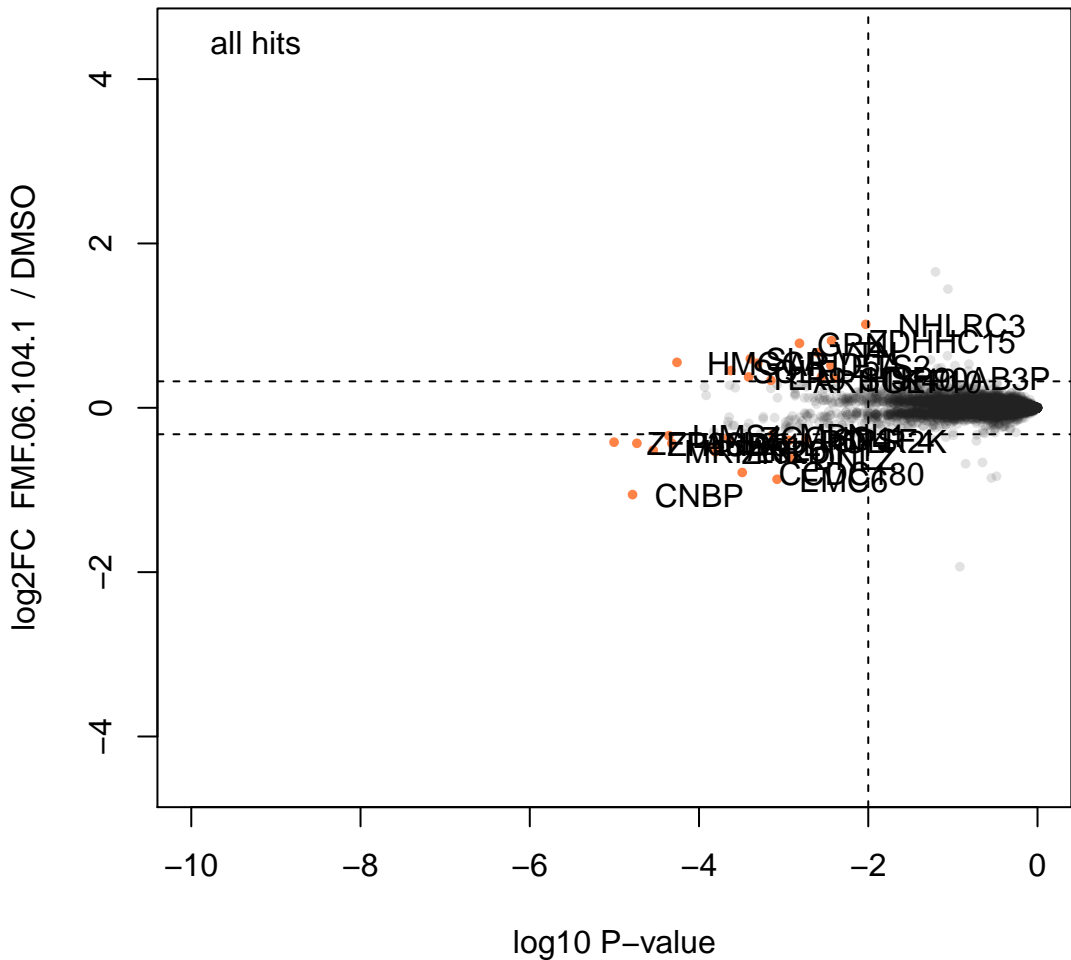

FMF.06.104.1 (wp131)

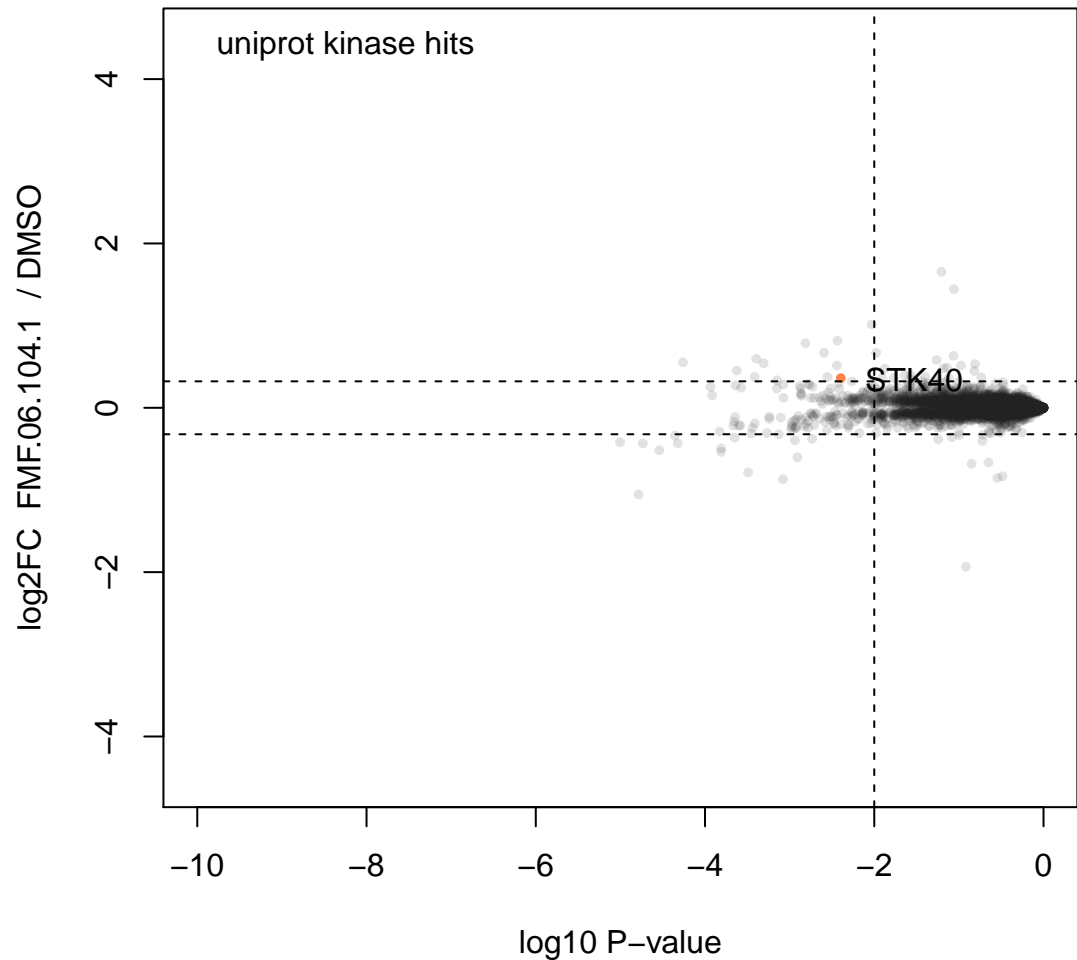

SK.3.91\_2hr (wp133)

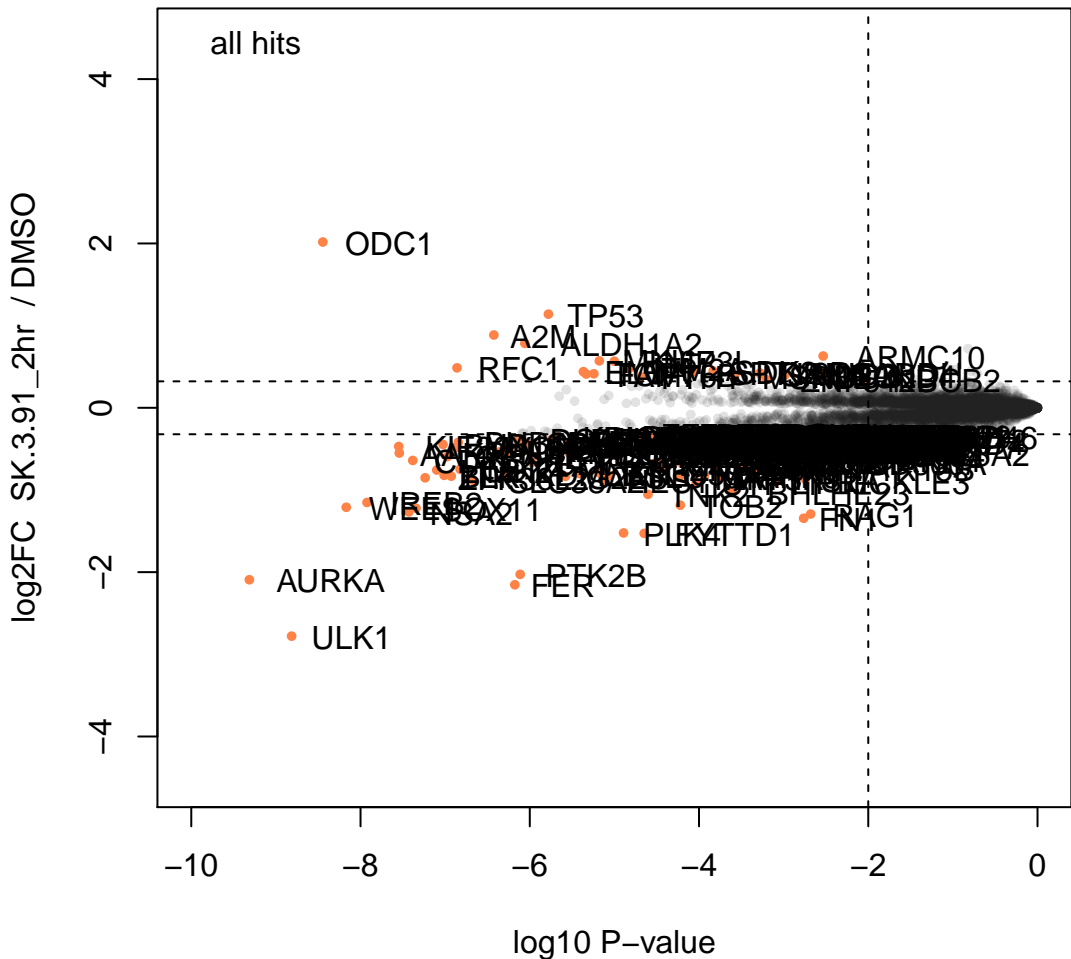

SK.3.91\_2hr (wp133)

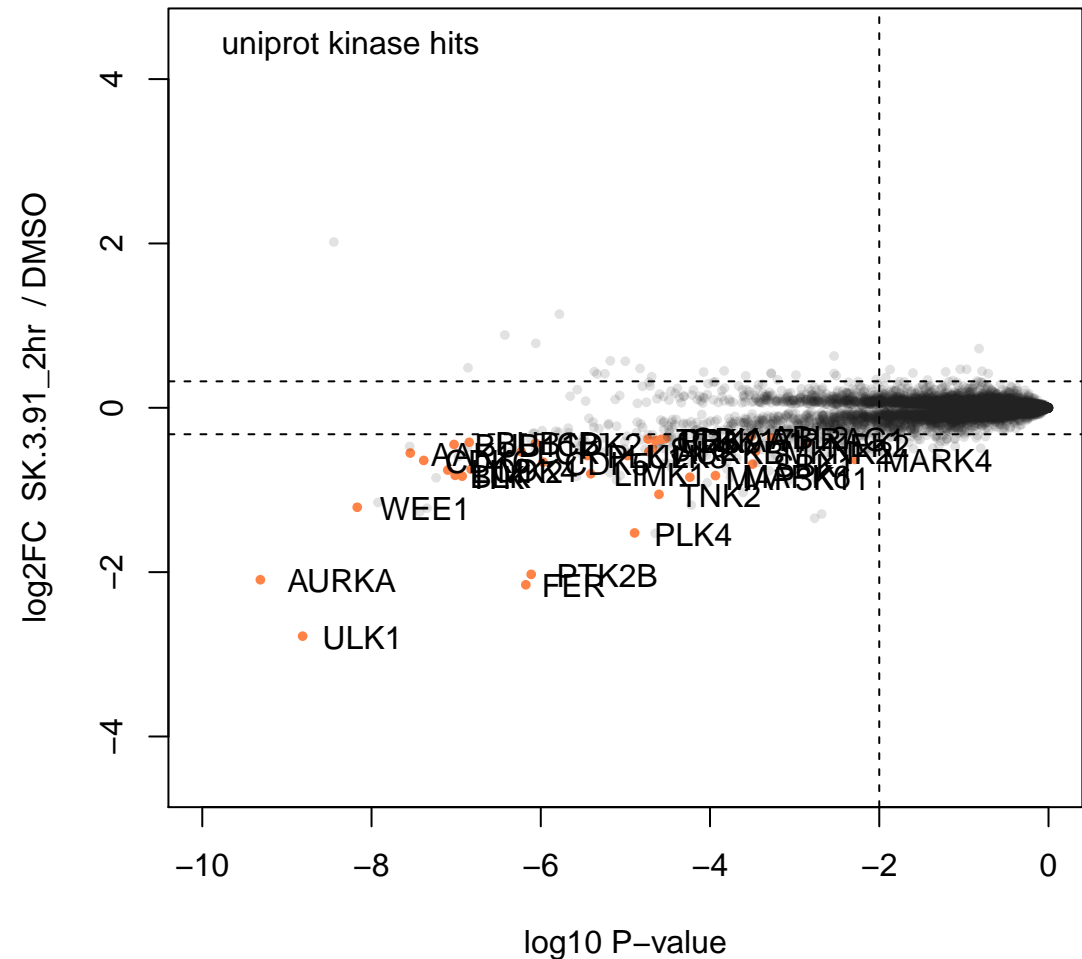



SK.3.91\_1hr (wp133)

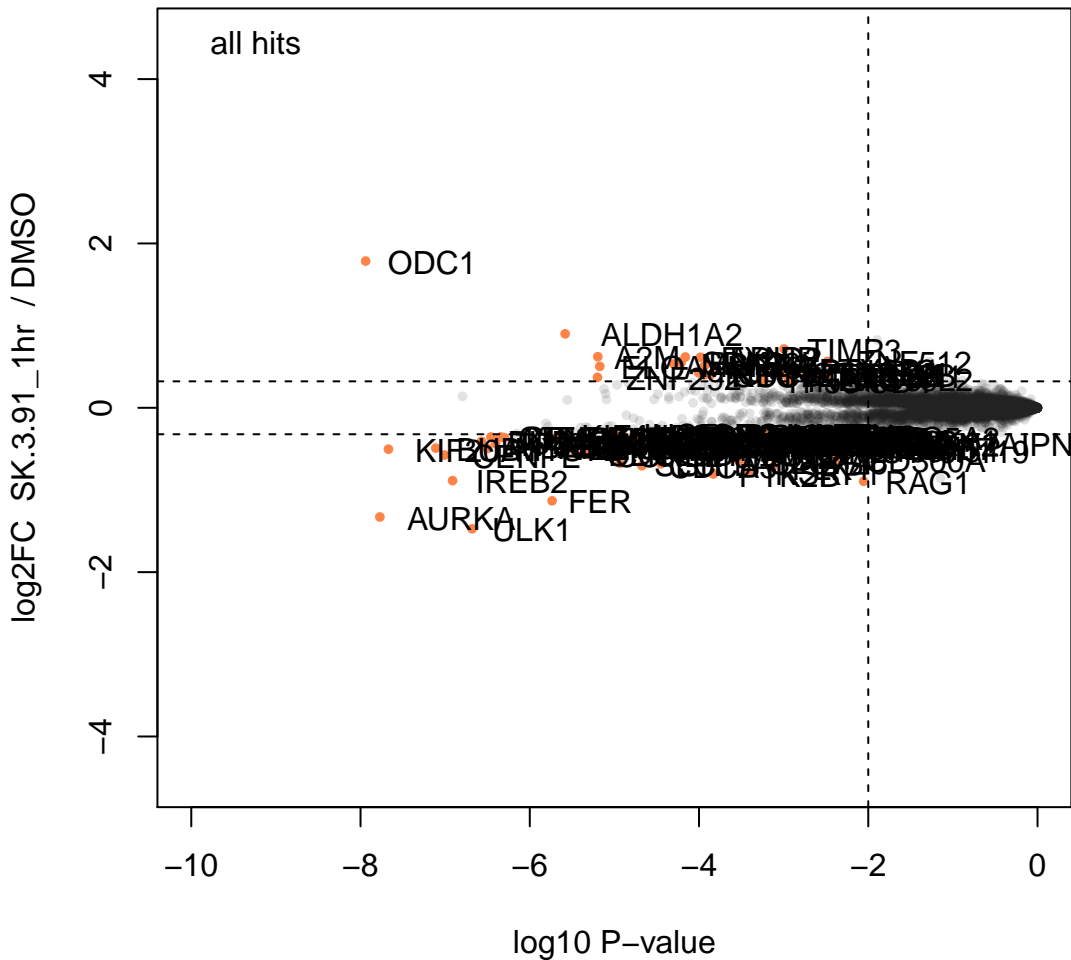

SK.3.91\_1hr (wp133)

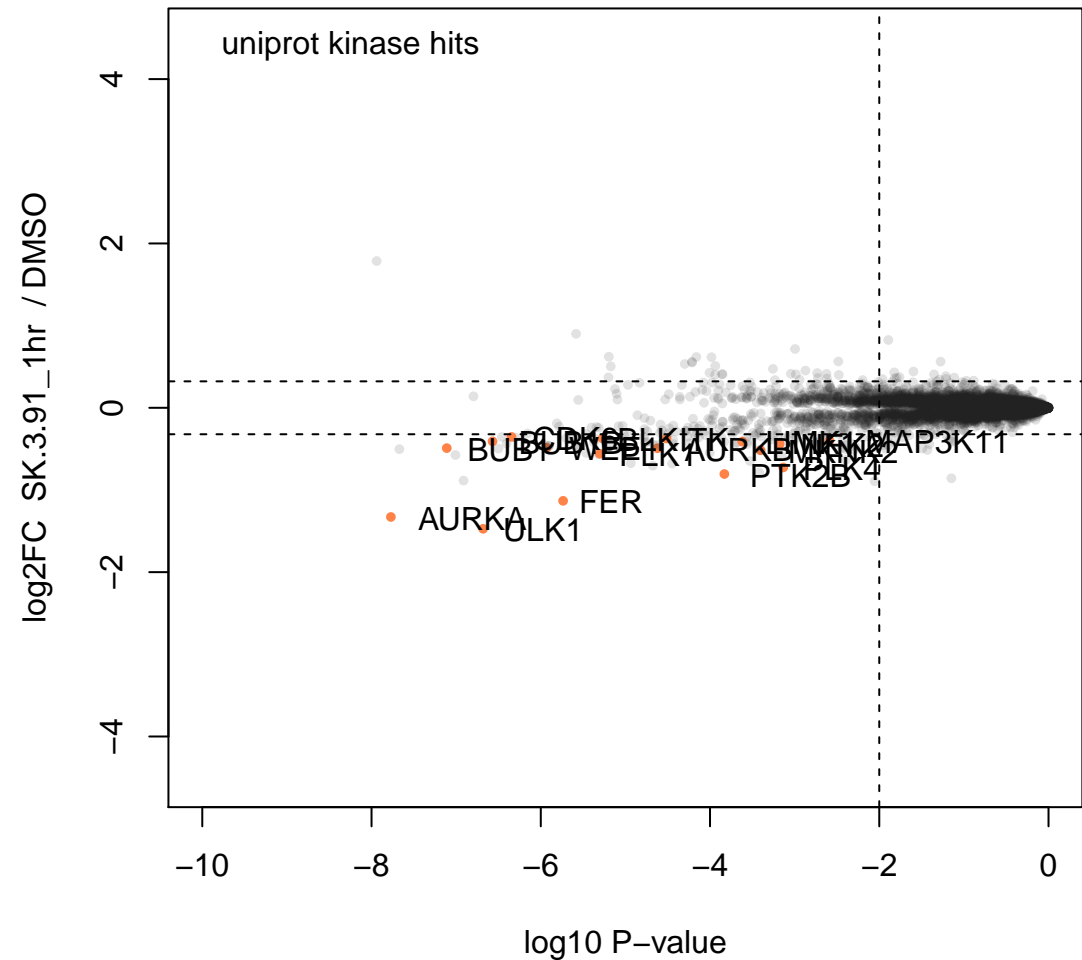



DB118430 (wp134)

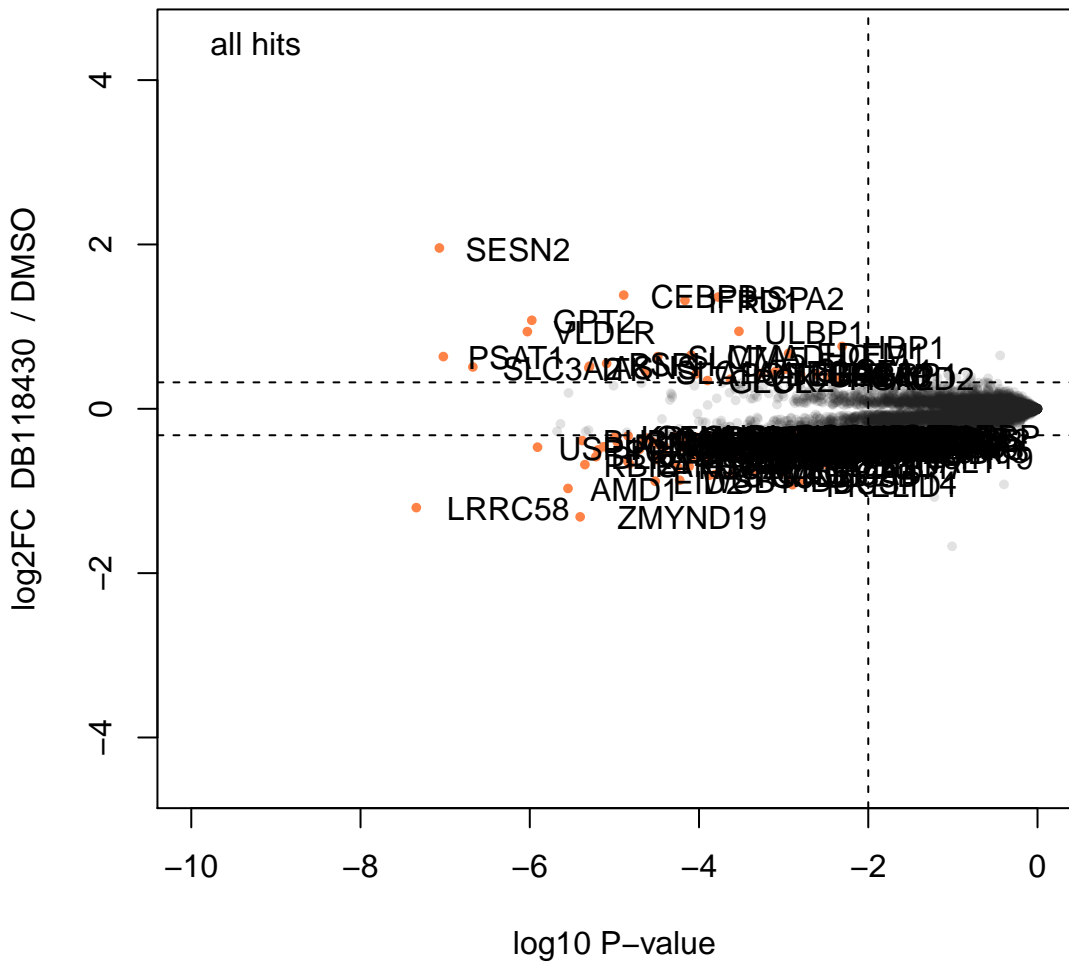

DB118430 (wp134)

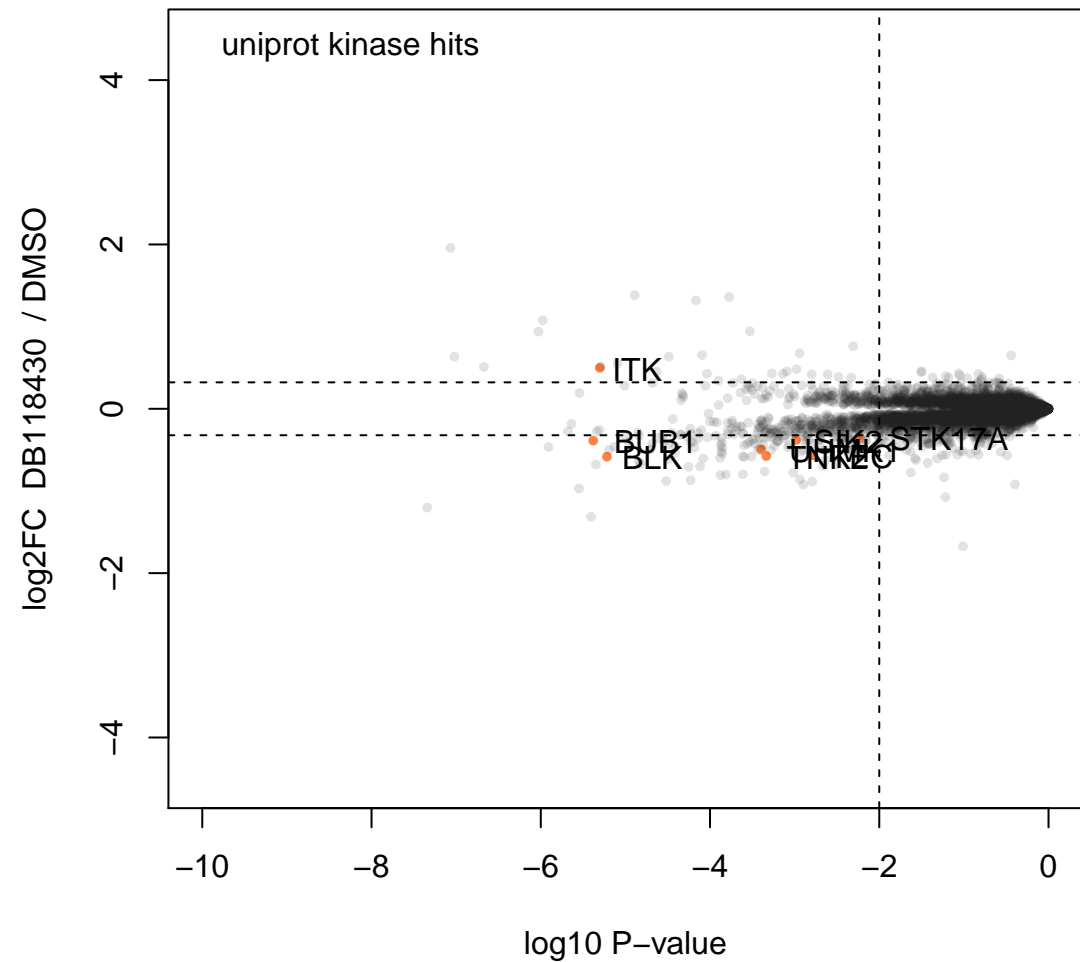

### BSJ.05.037 (wp134)

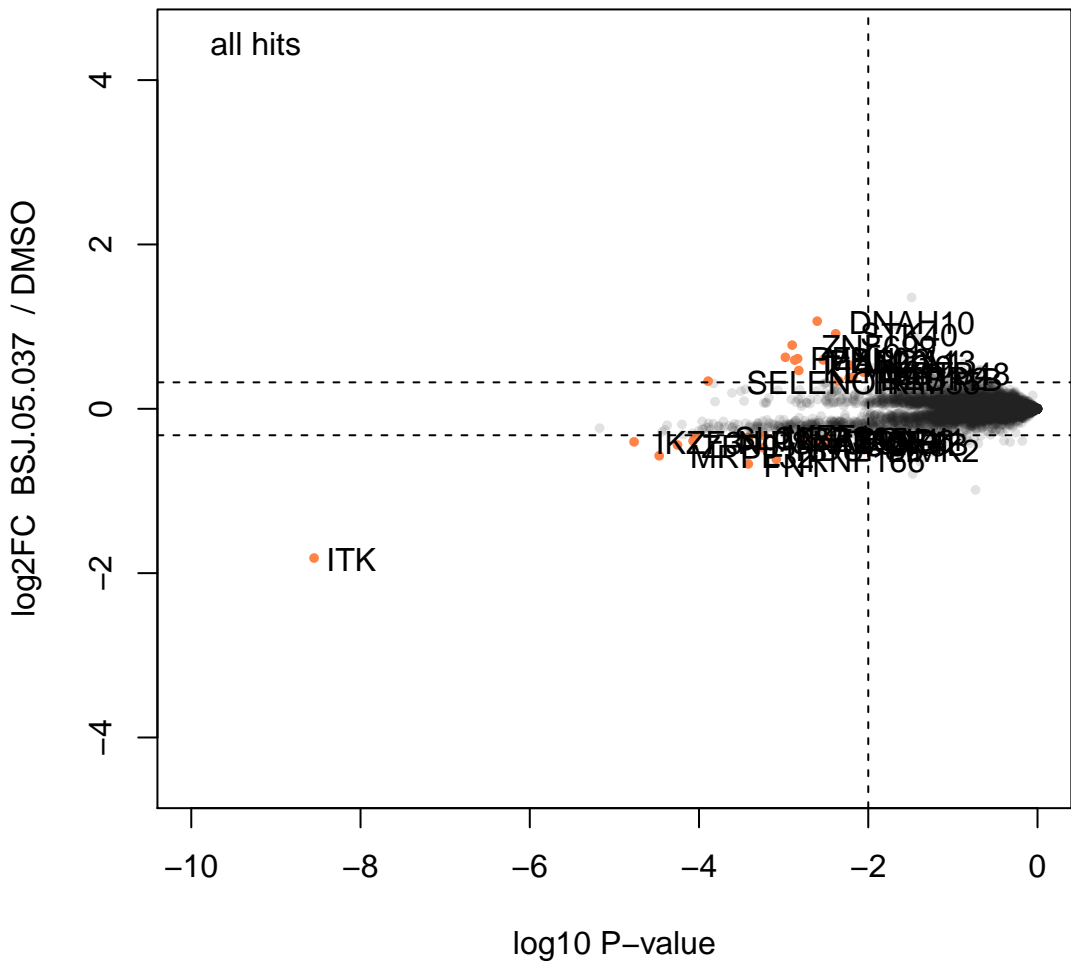

### BSJ.05.037 (wp134)

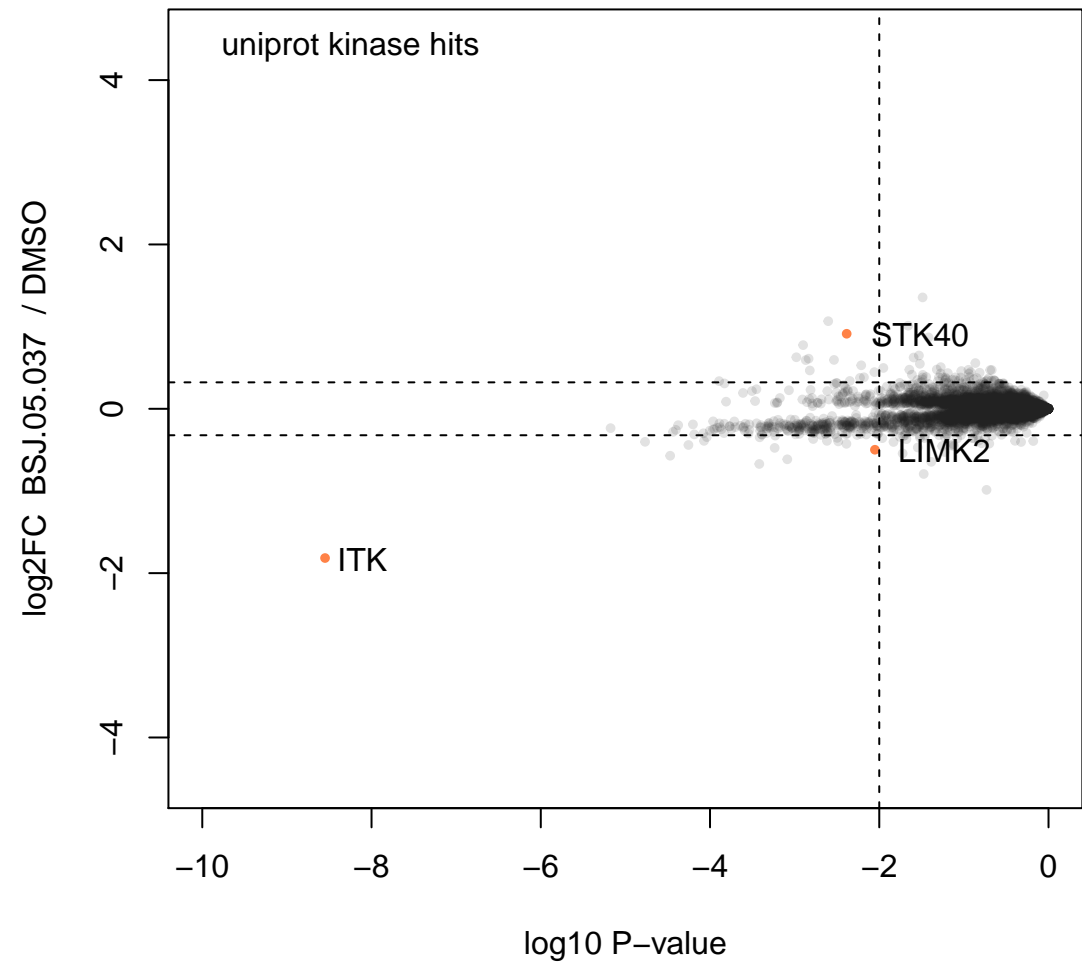

JWG.120 (wp134)

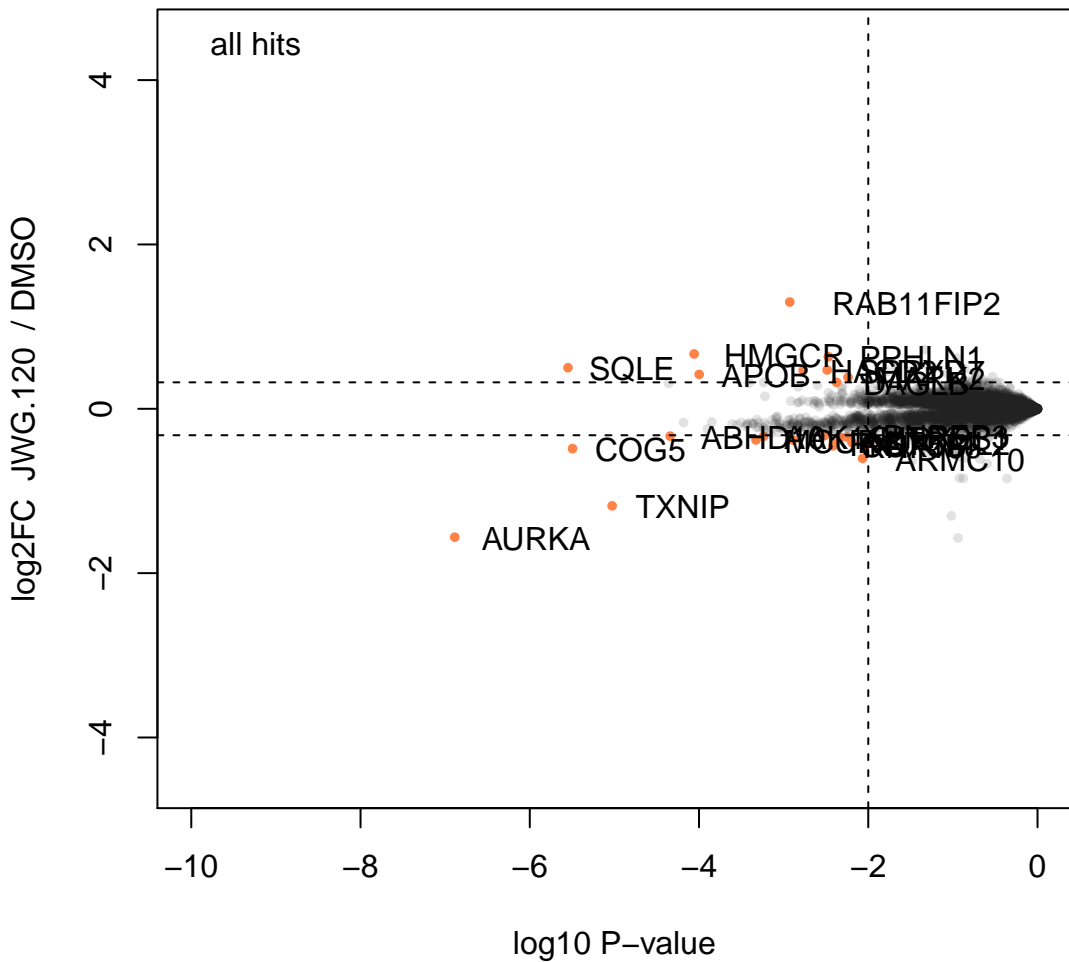

JWG.120 (wp134)

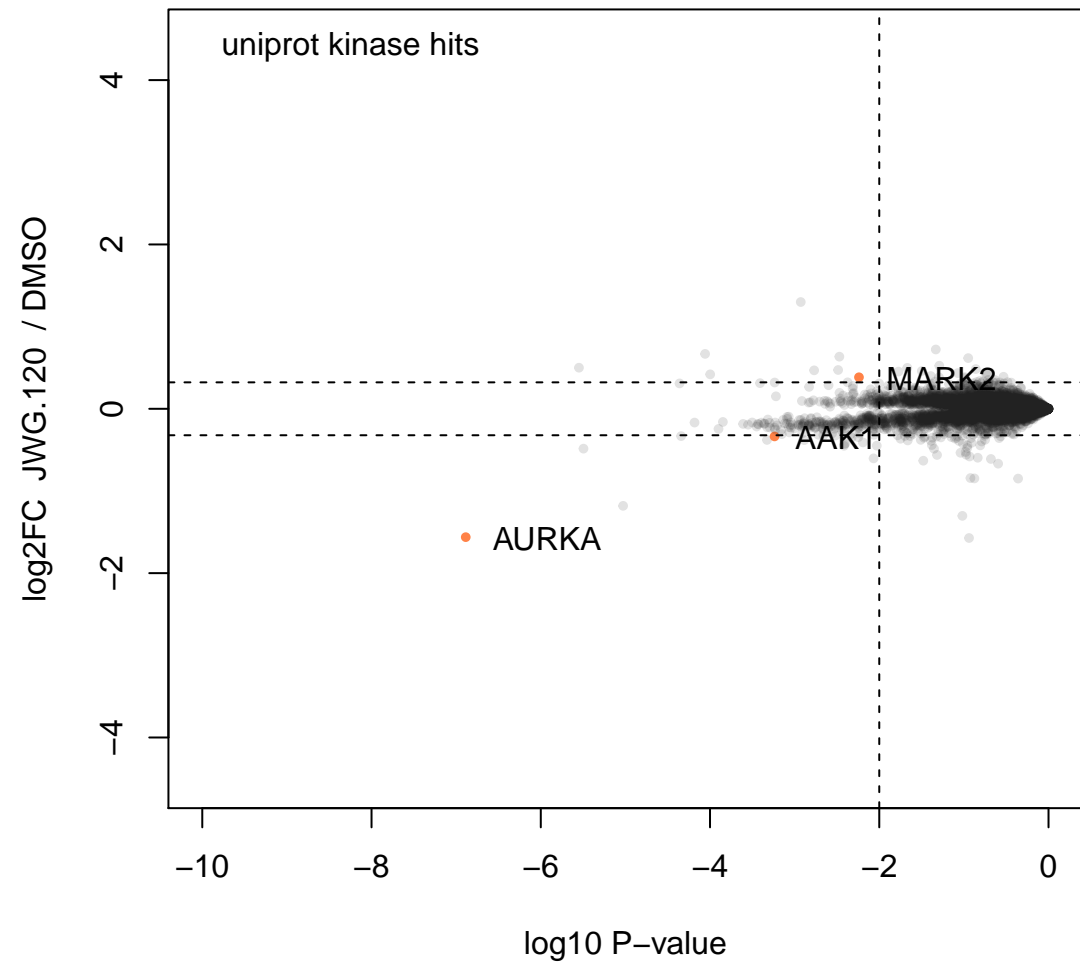



INY.03.041\_01\_8hr (wp135)

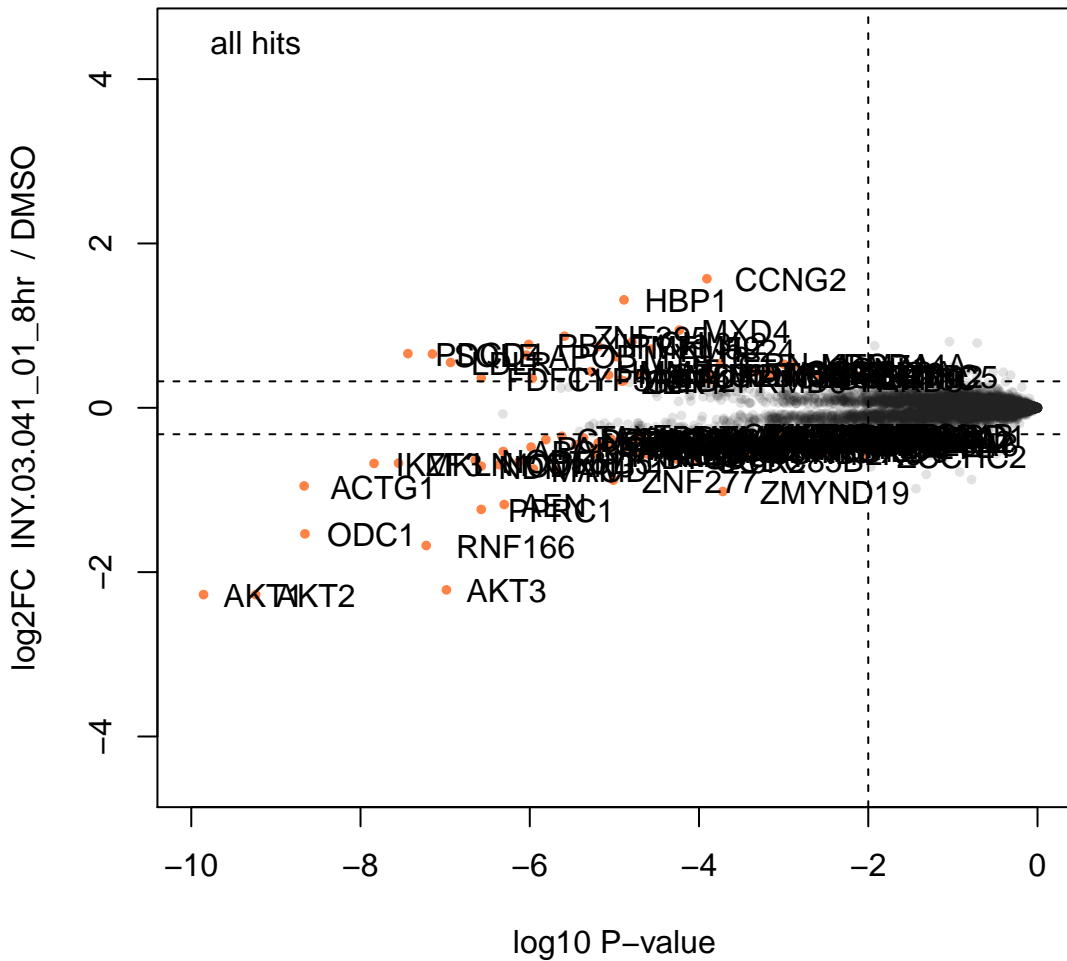

INY.03.041\_01\_8hr (wp135)

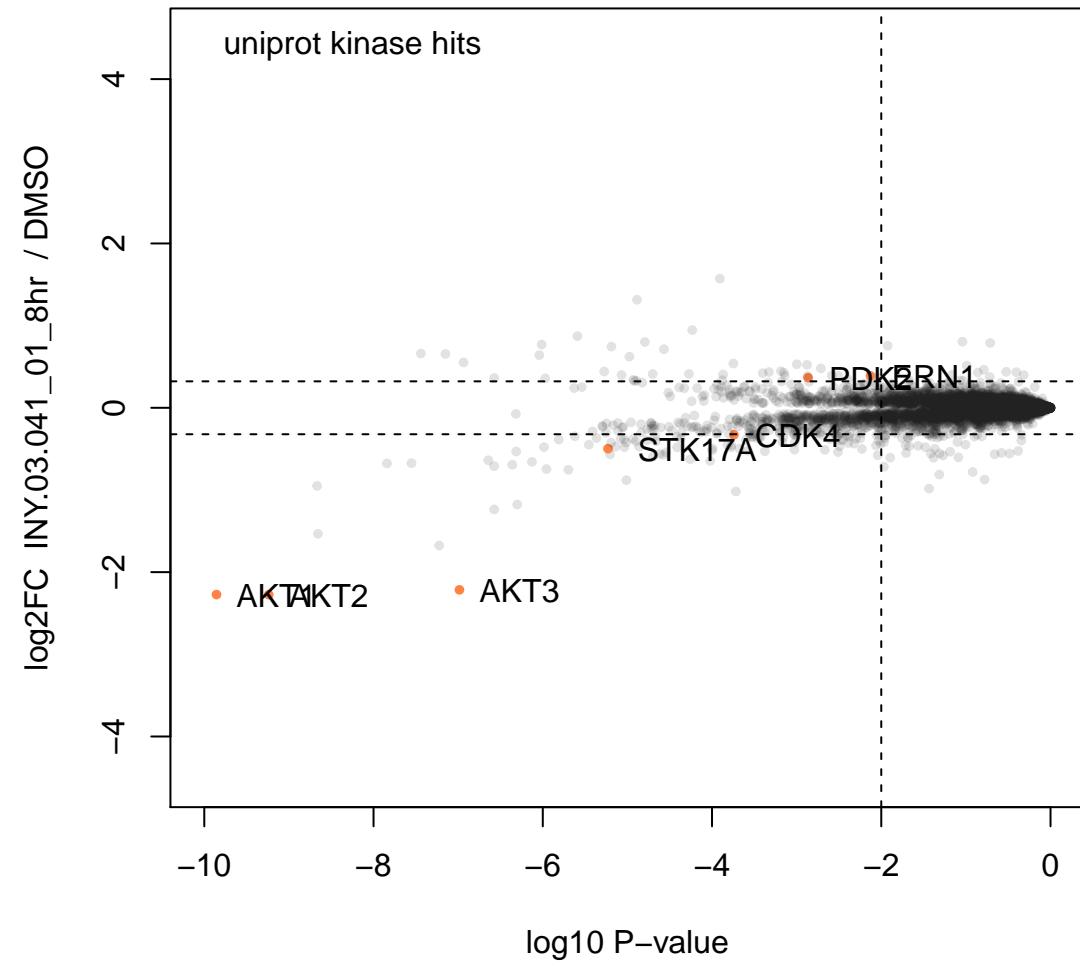

INY.03.041.01\_4hr (wp135)

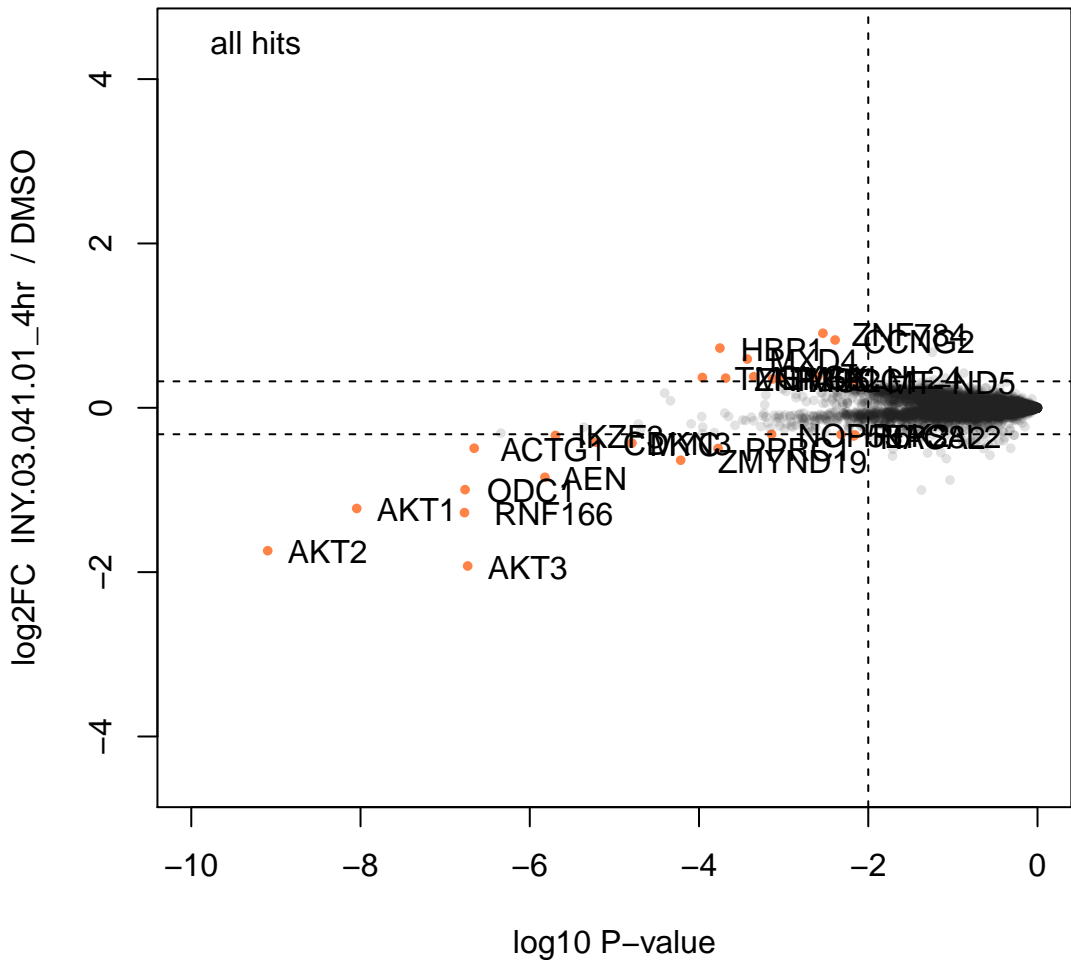

INY.03.041.01\_4hr (wp135)

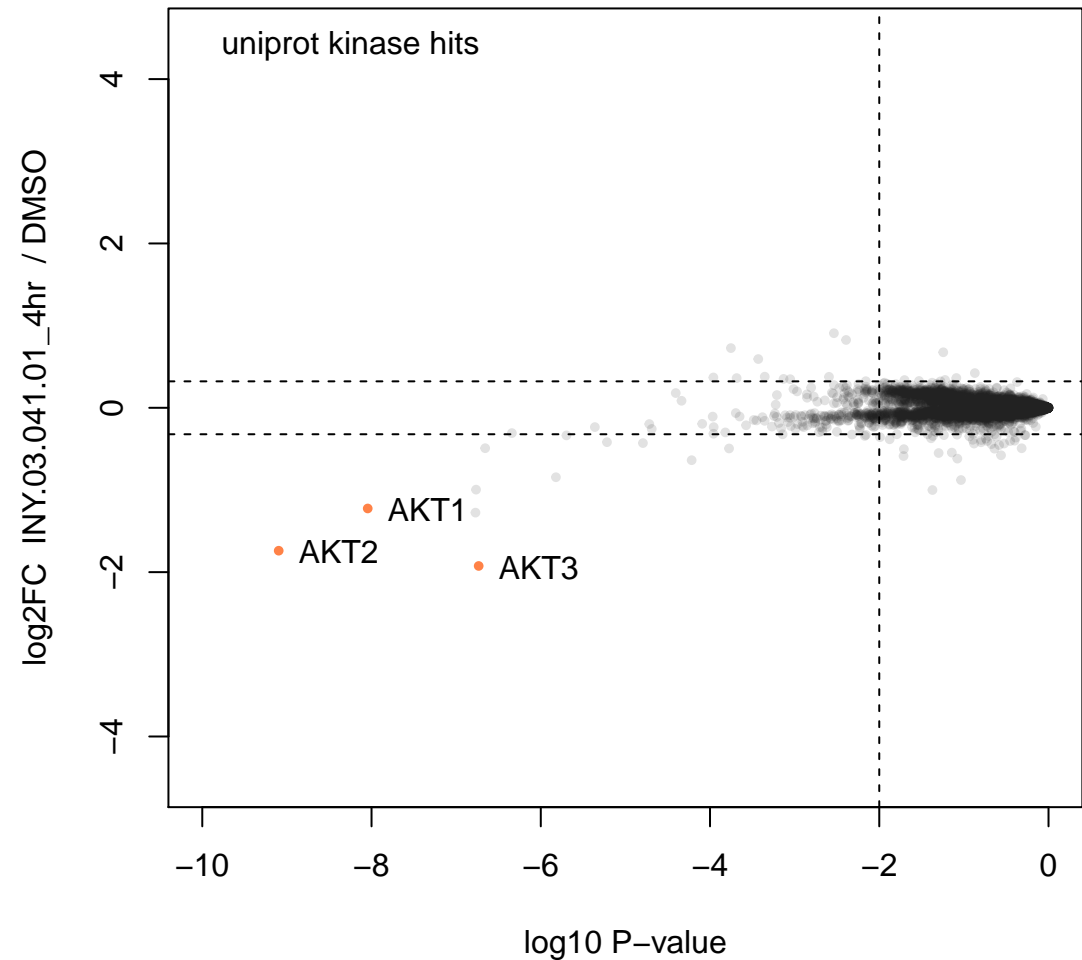



DD.03.106 (wp137)

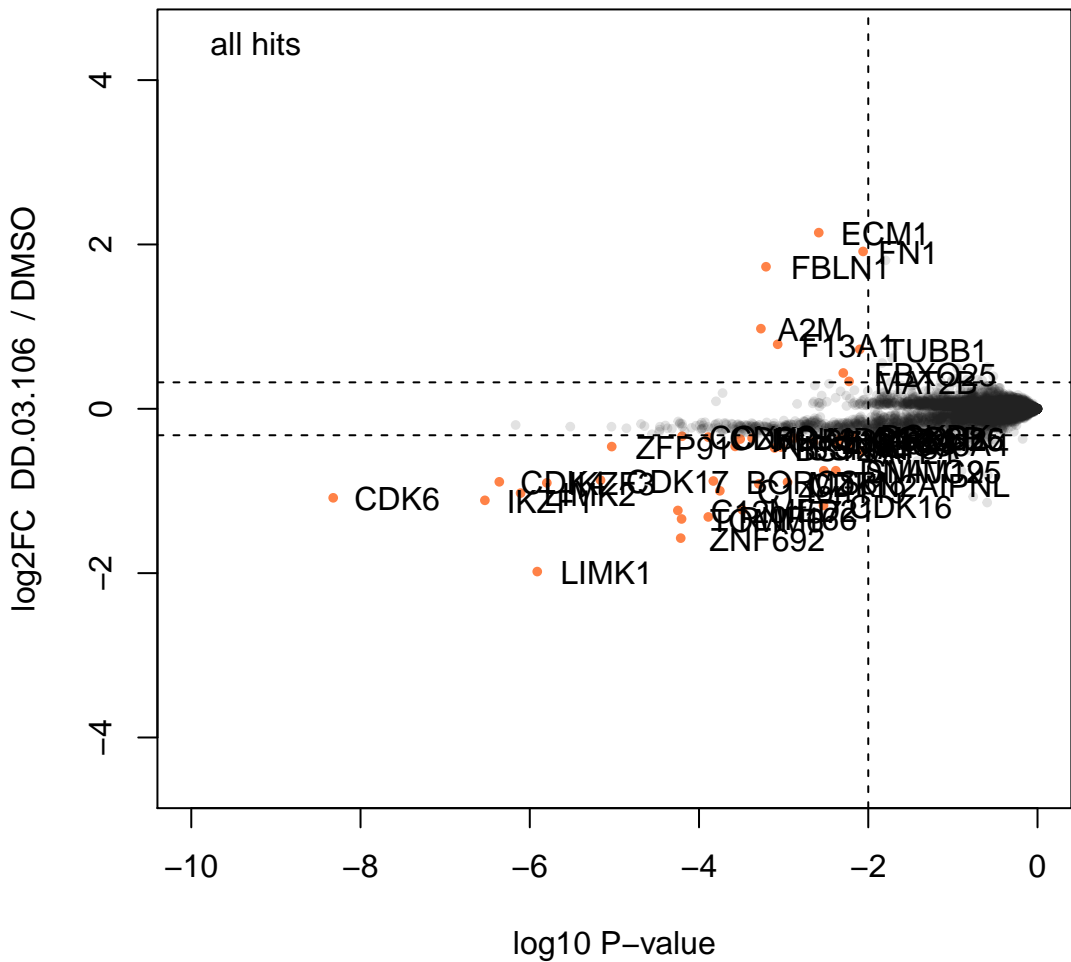

DD.03.106 (wp137)

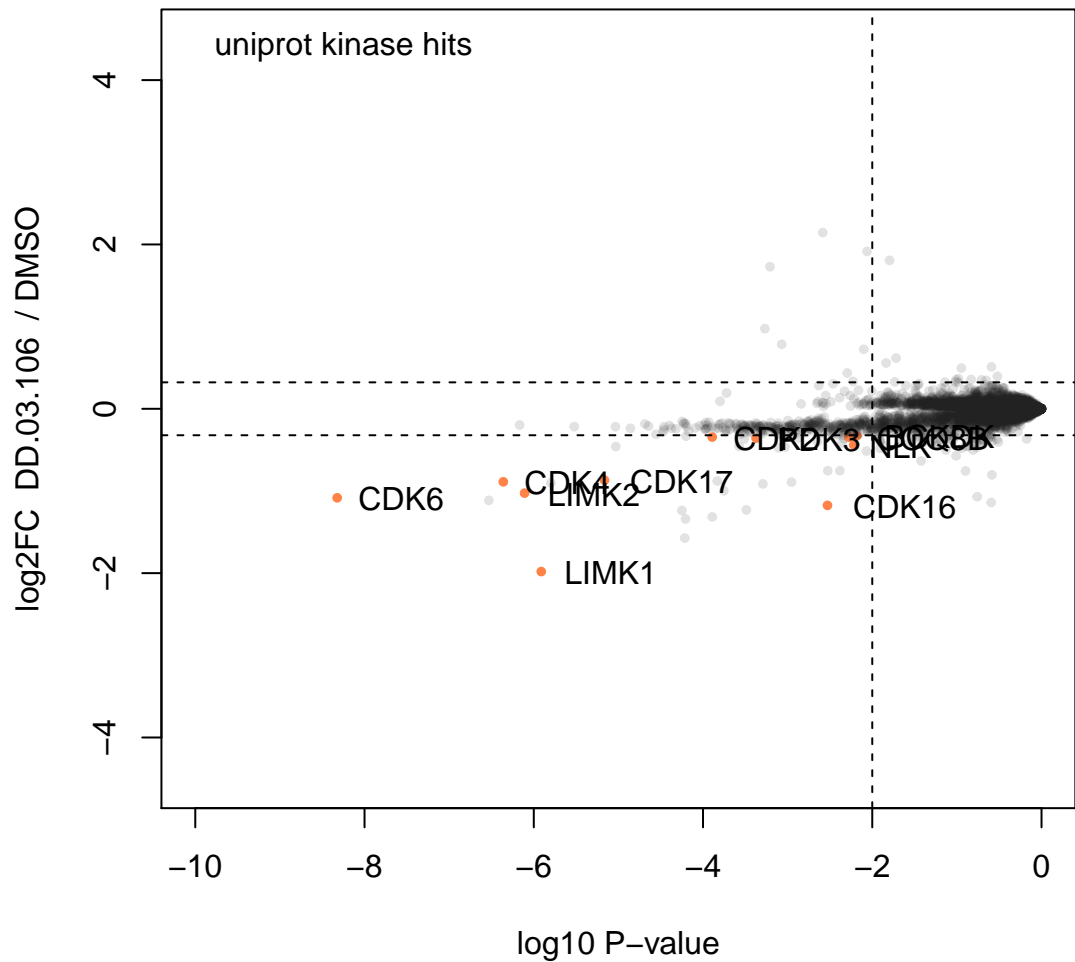

INY.02.164 (wp137)

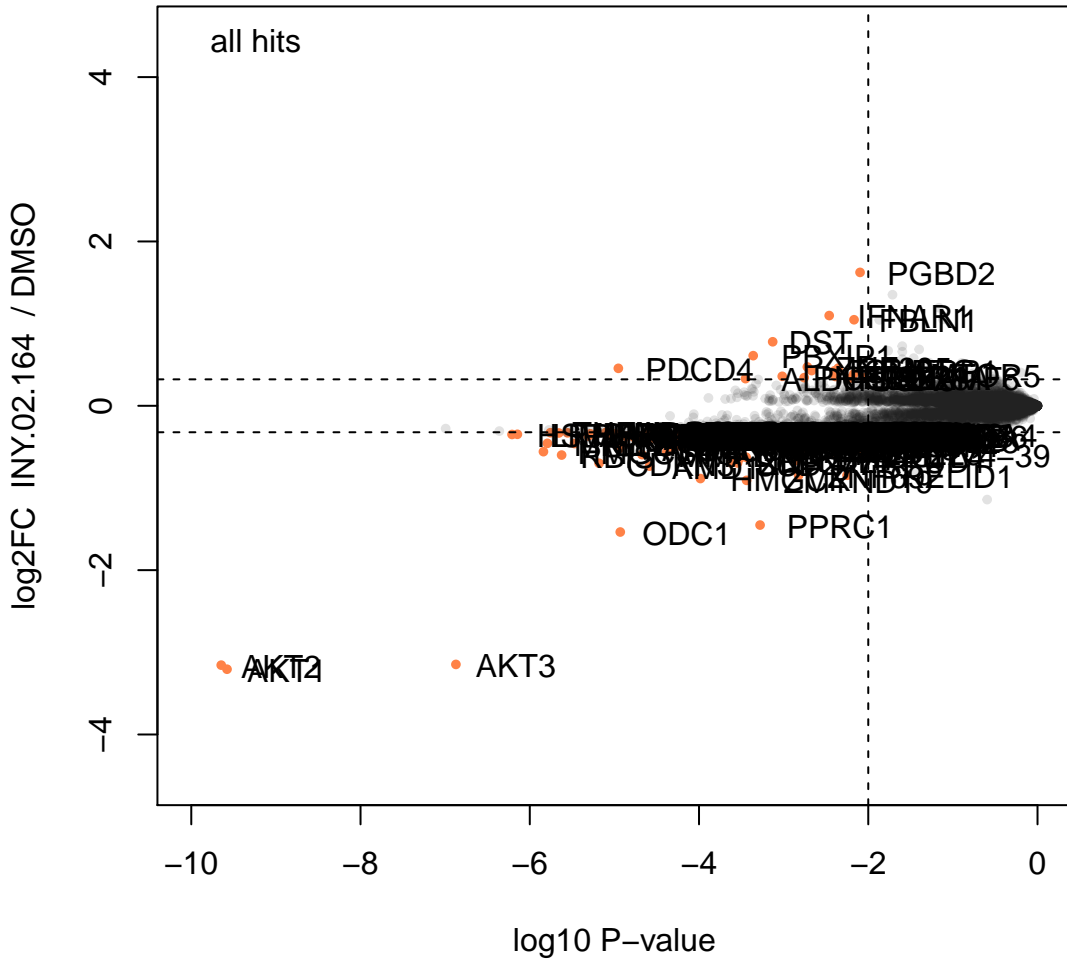

INY.02.164 (wp137)

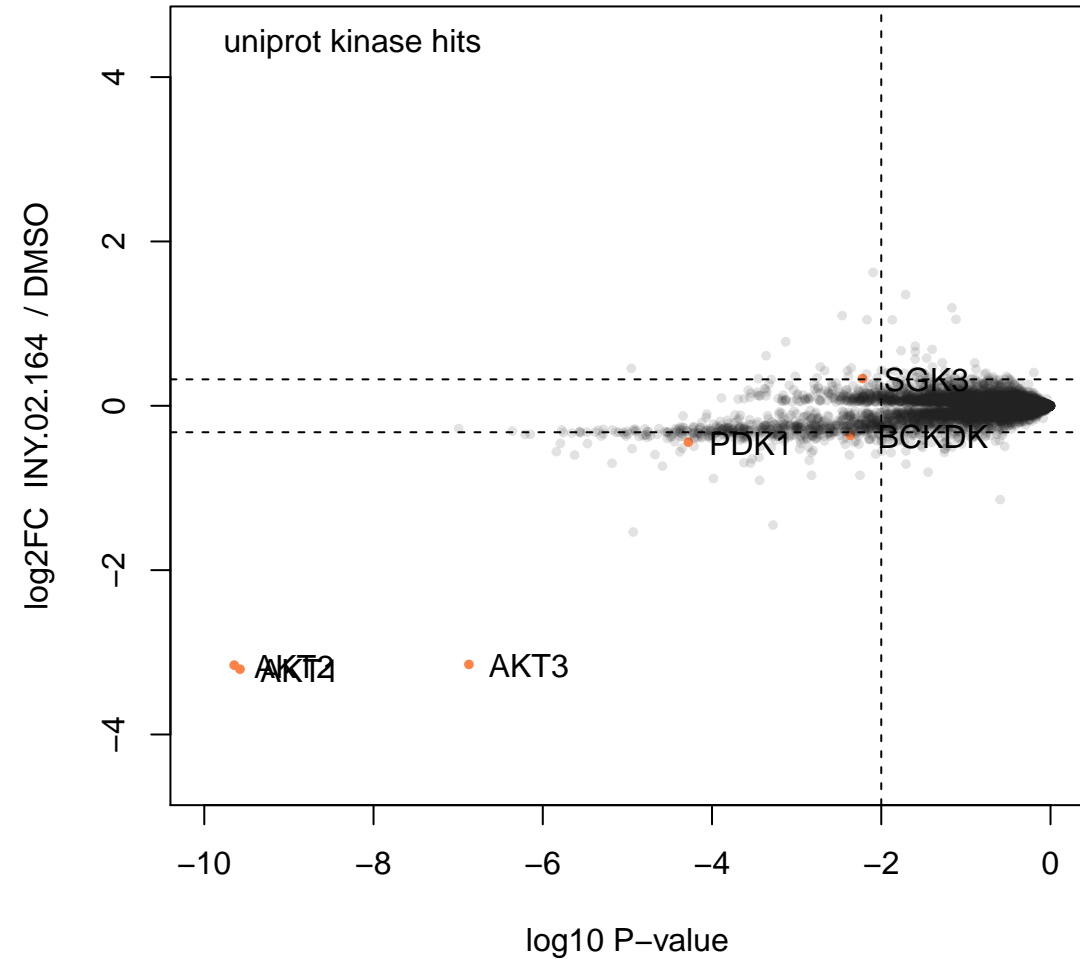

TL12.186 (wp137)

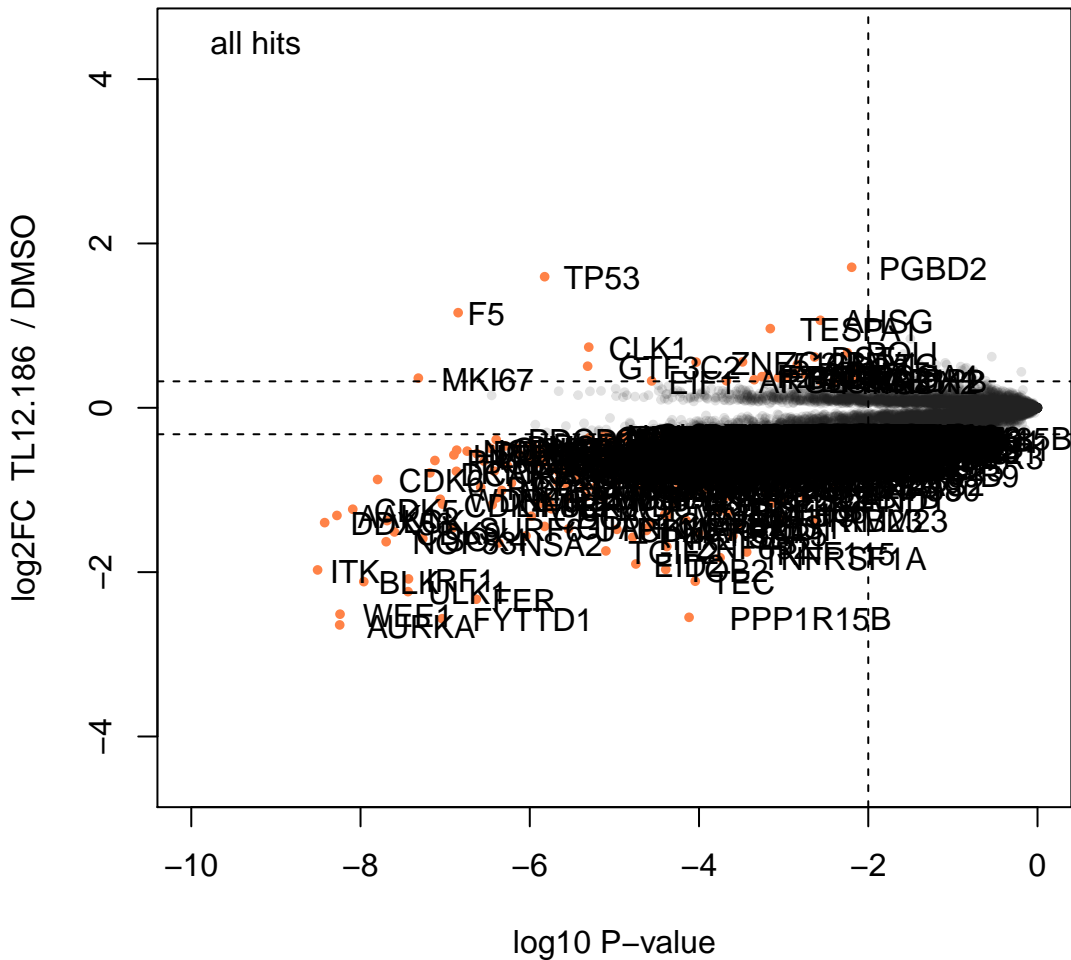

TL12.186 (wp137)

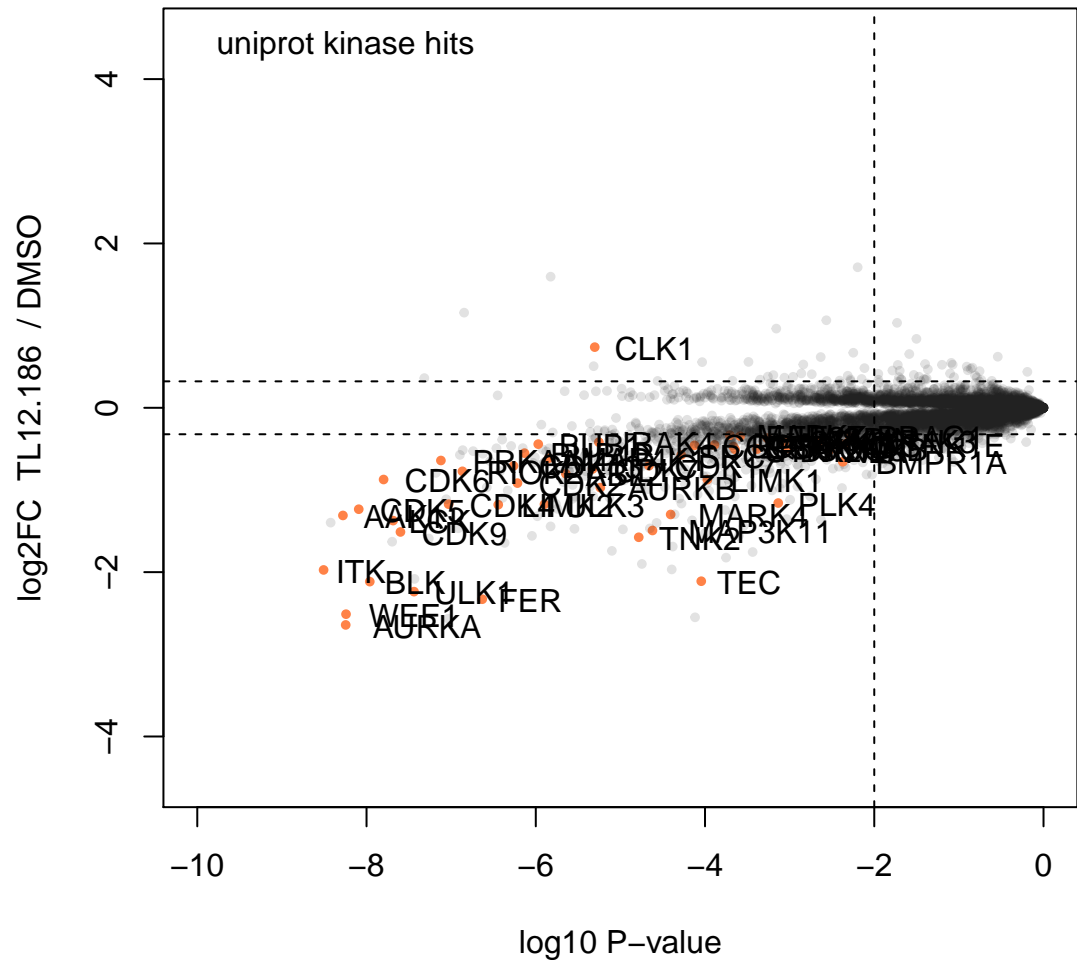

DD.03.107 (wp137)

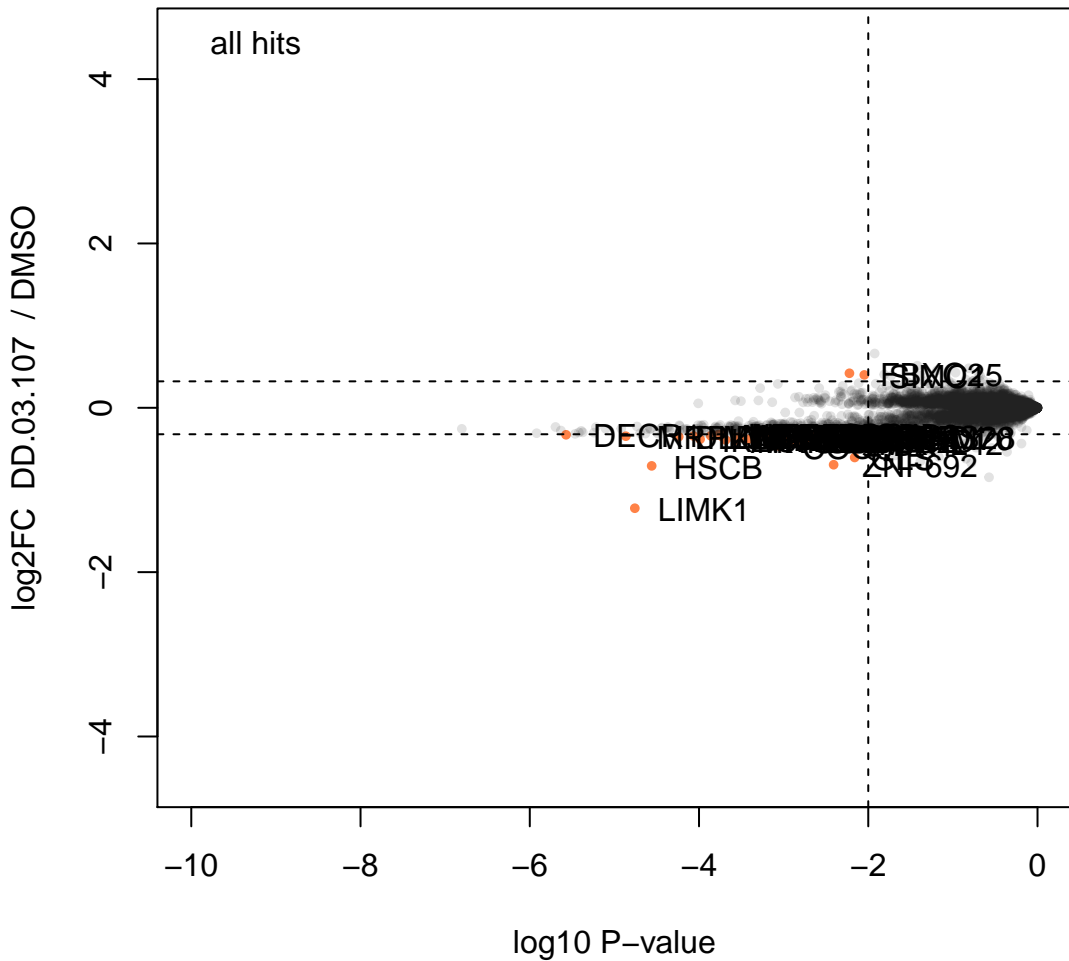

DD.03.107 (wp137)

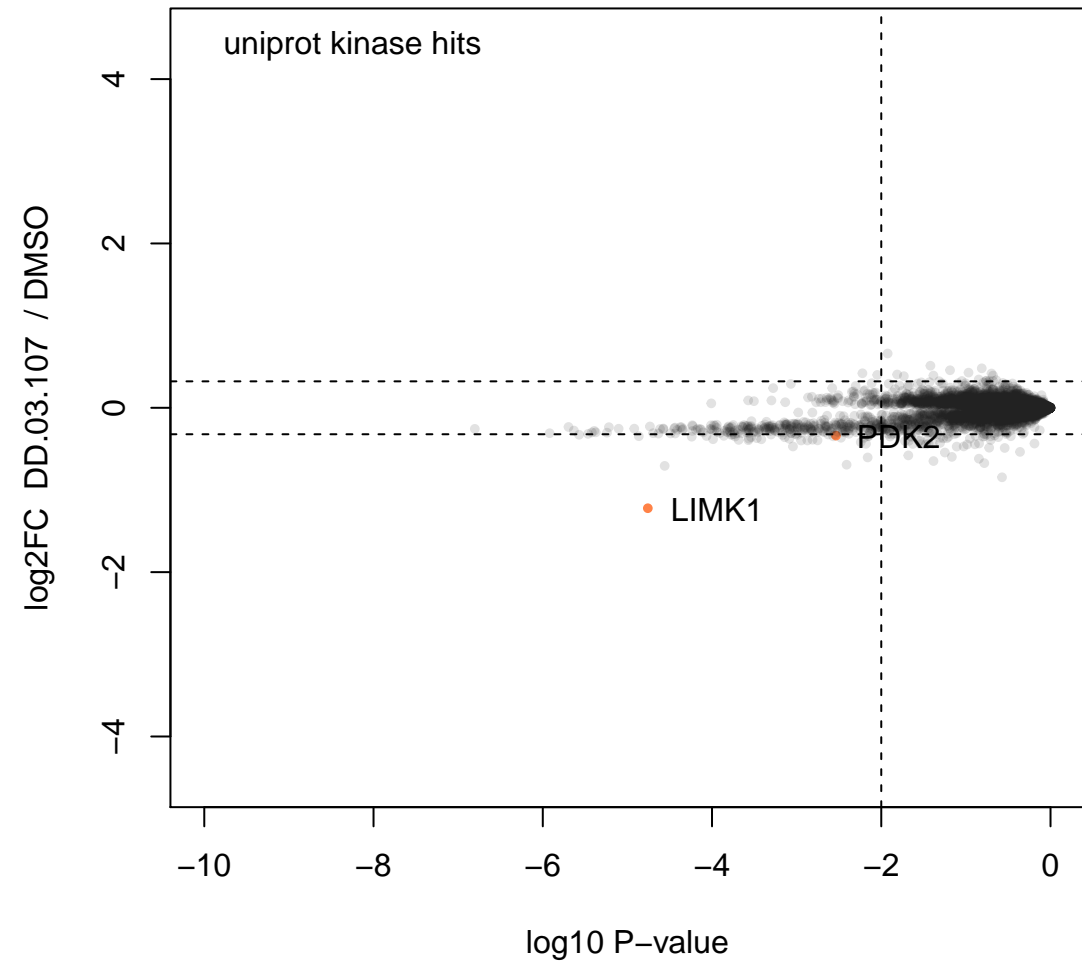

BSJ.03.204 (wp137)

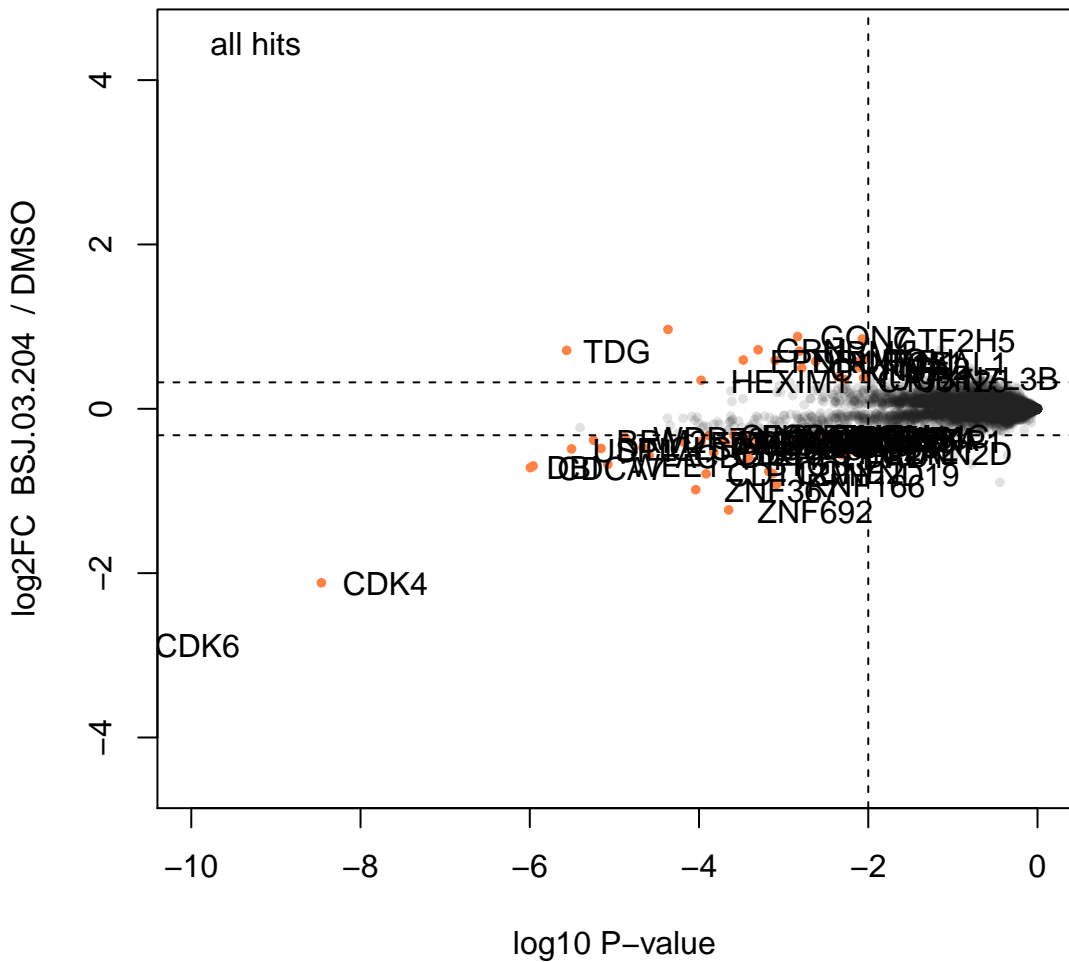

BSJ.03.204 (wp137)

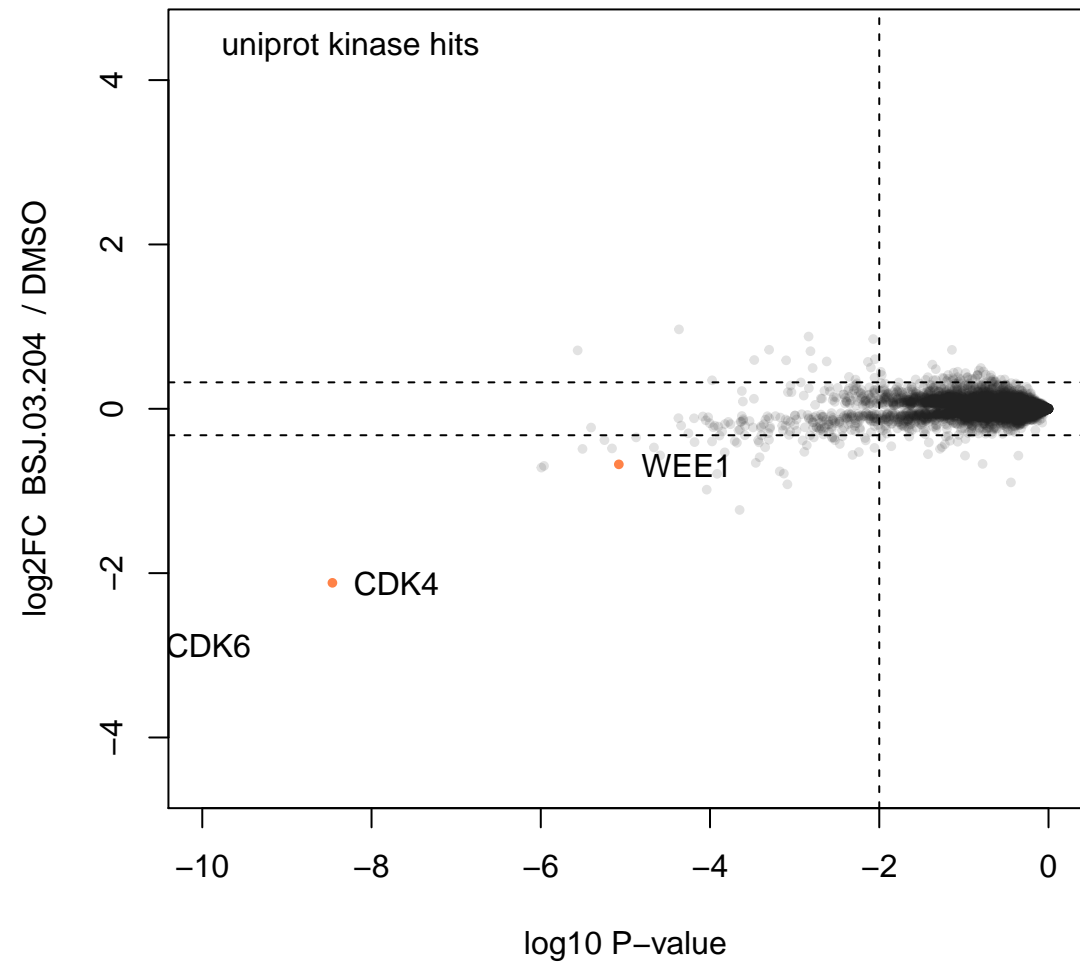



TM.04.168.03 (wp138)

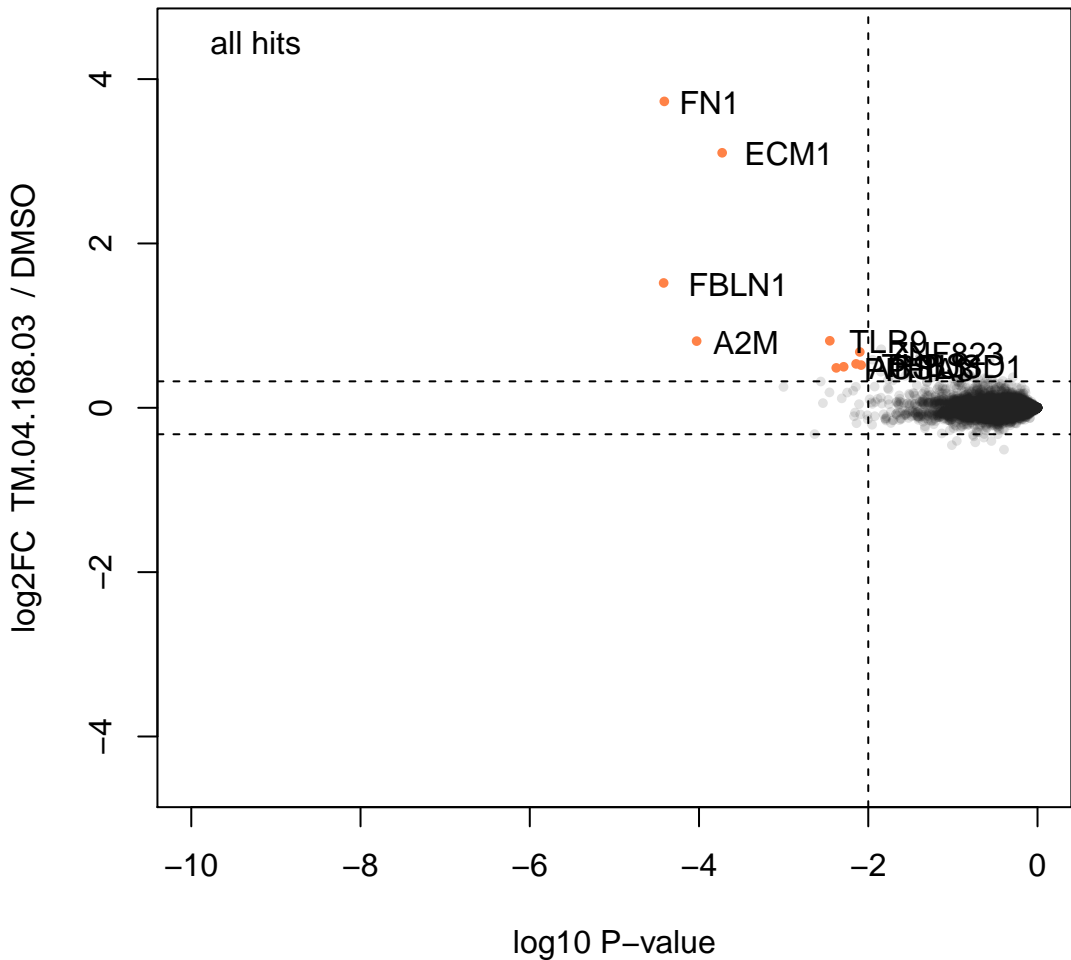

TM.04.168.03 (wp138)

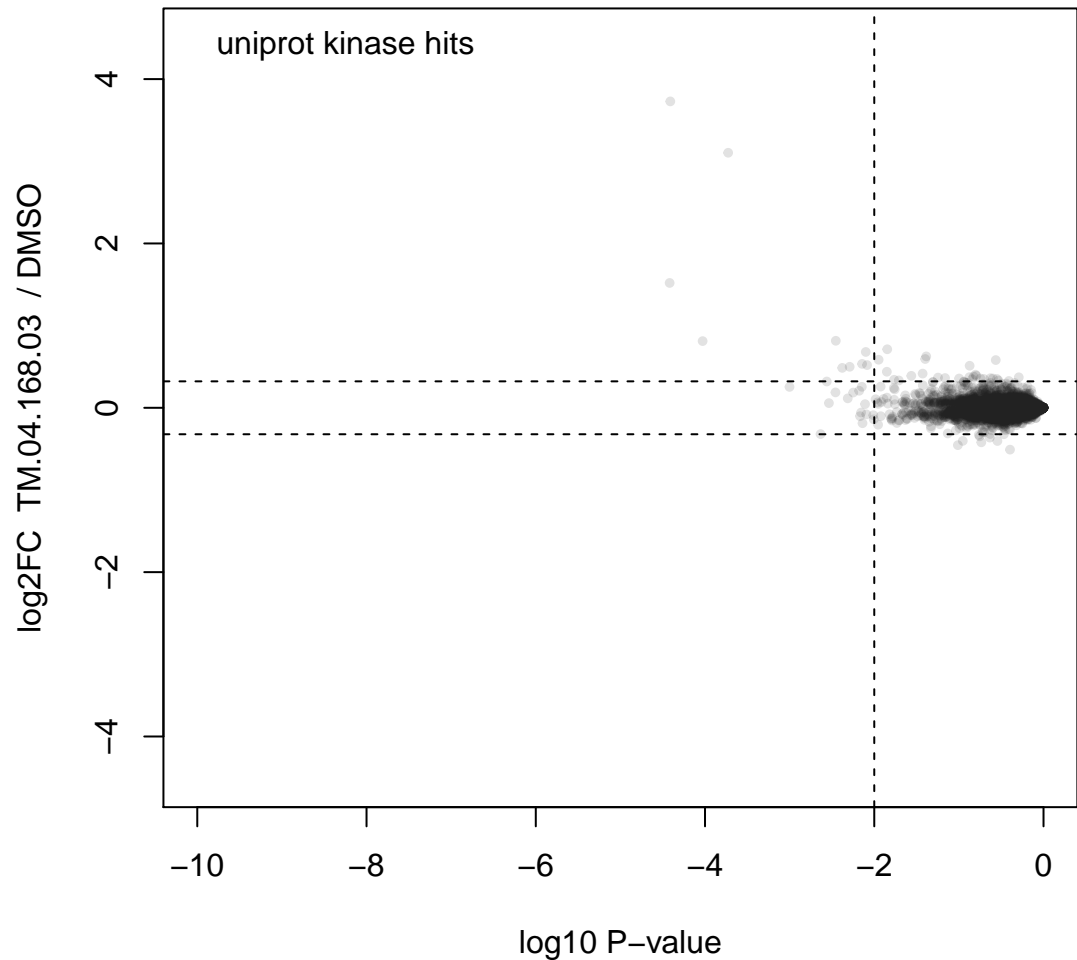

TMX.01.160 (wp146)

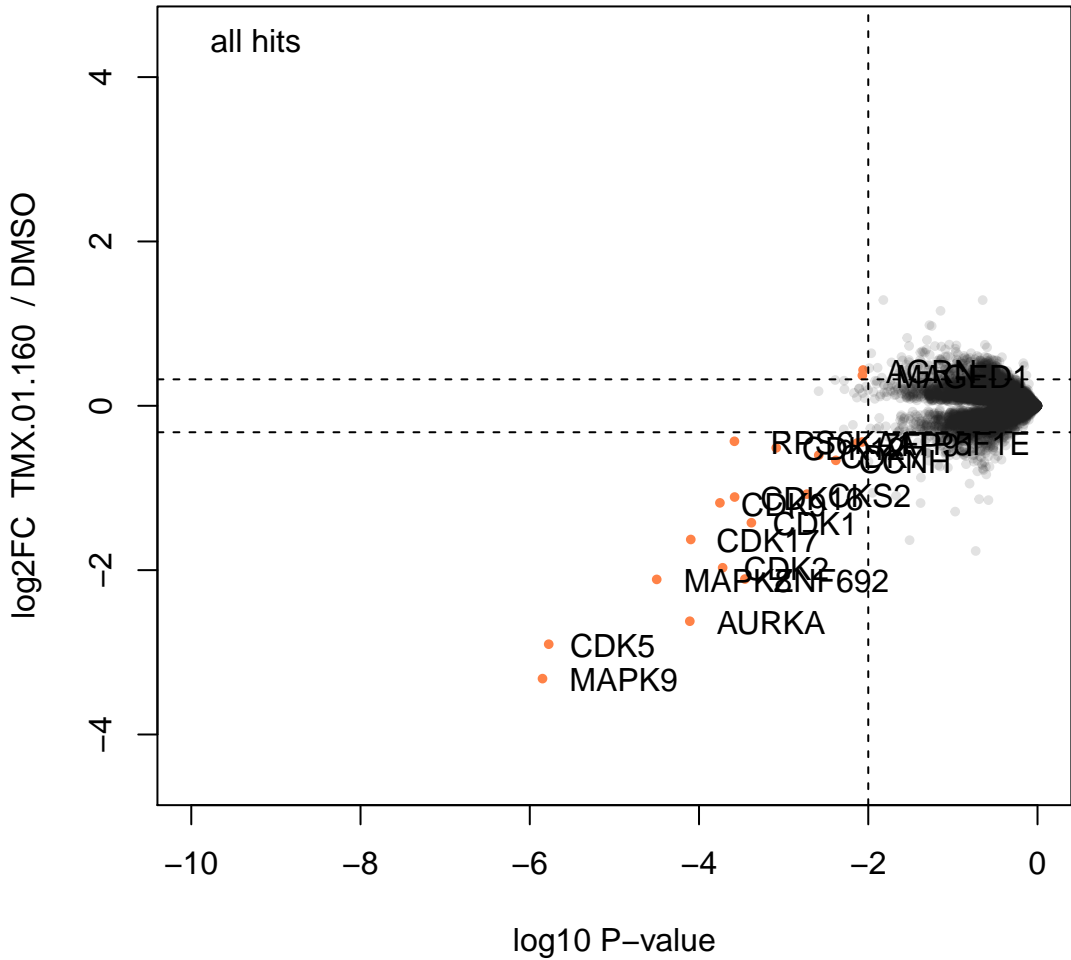

TMX.01.160 (wp146)

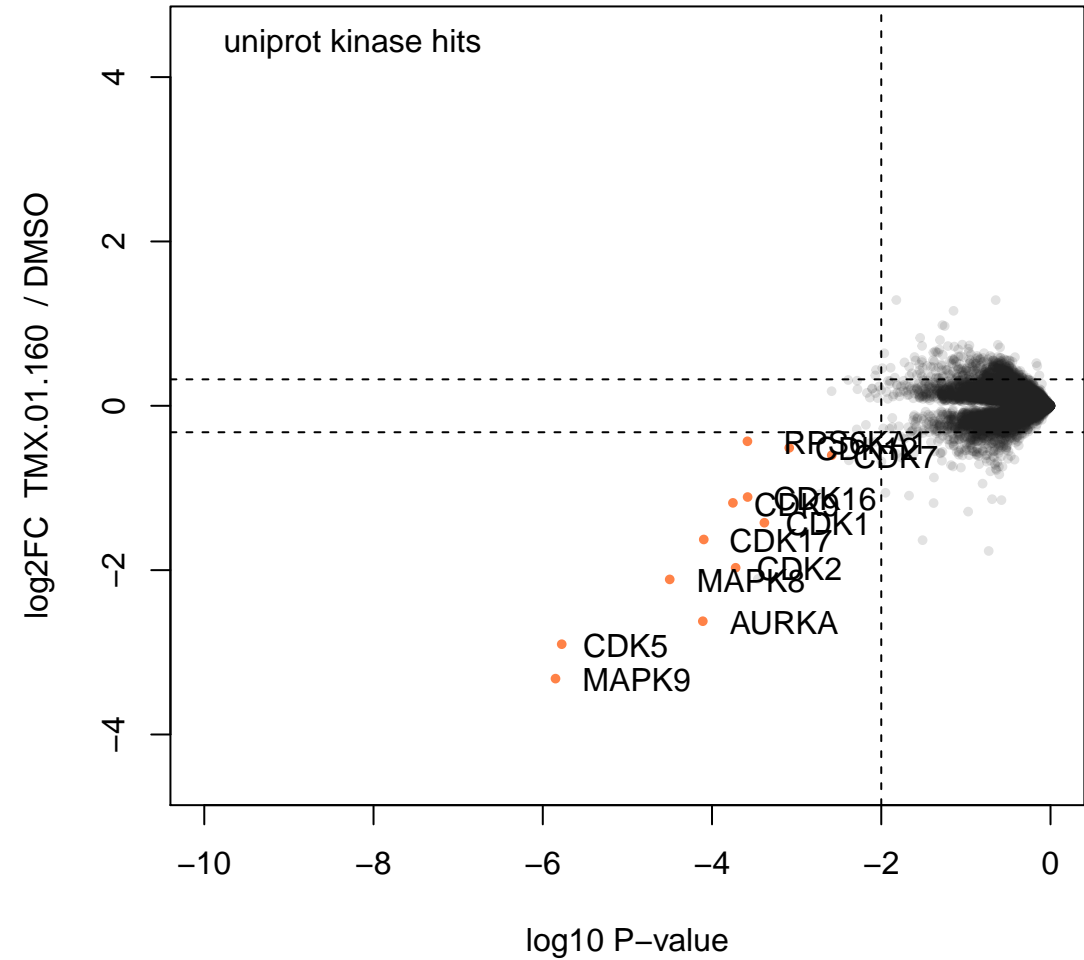





**TMX.02.172 (wp146)**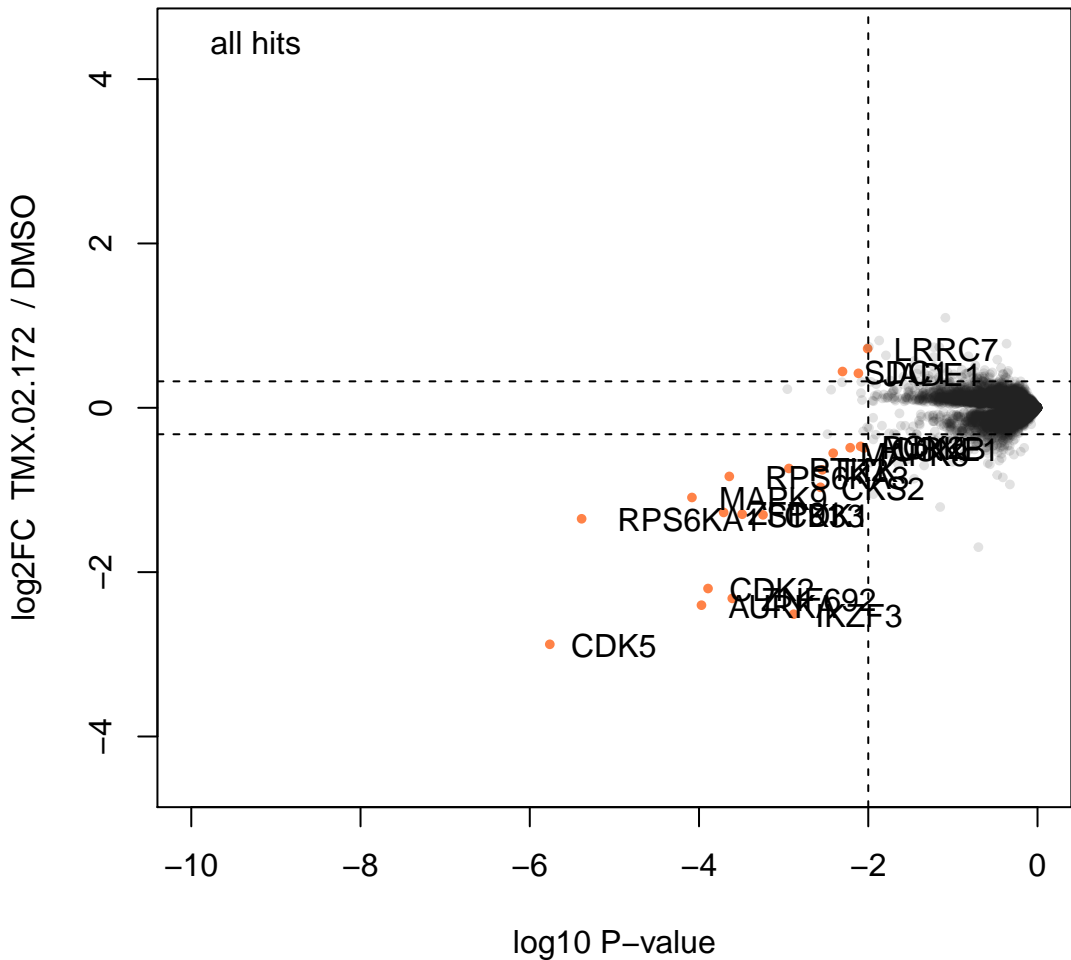**TMX.02.172 (wp146)**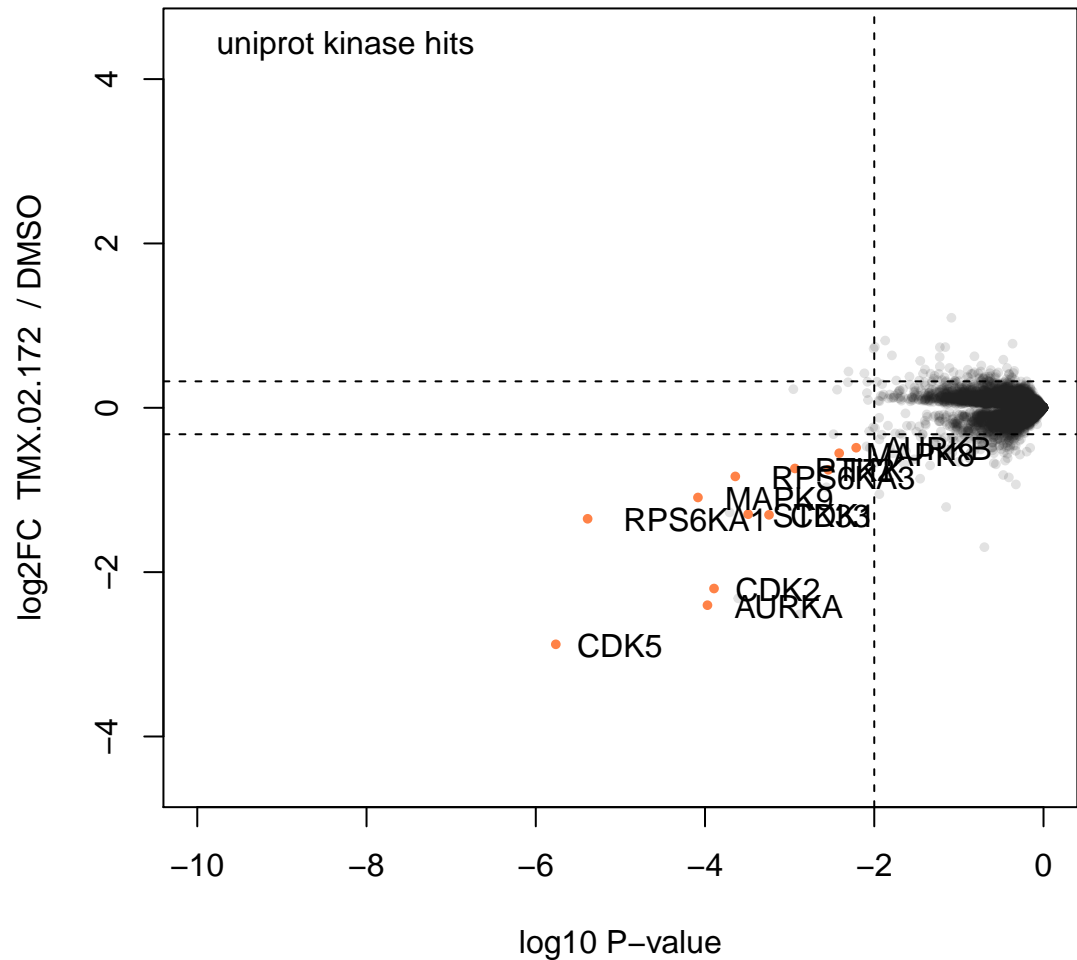





DD\_03.106\_2uM (wp147)

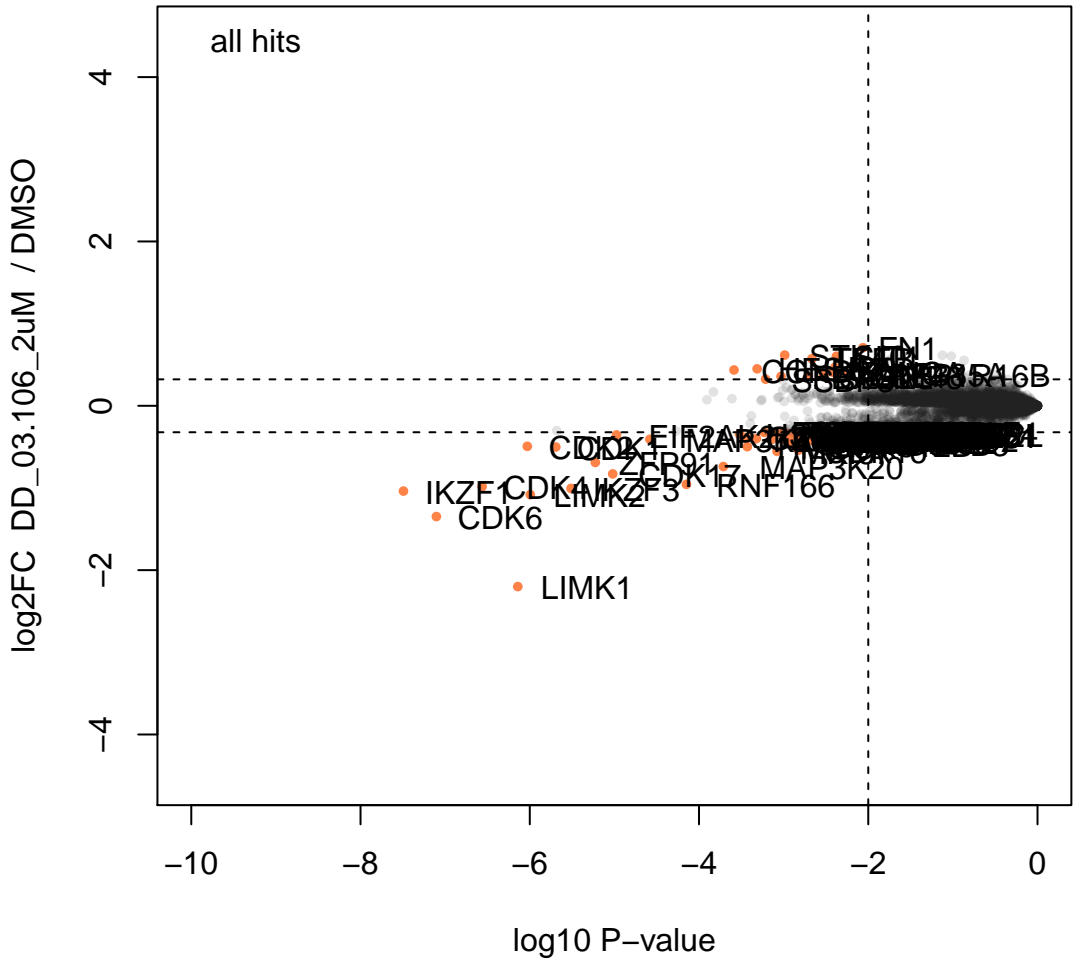

DD\_03.106\_2uM (wp147)

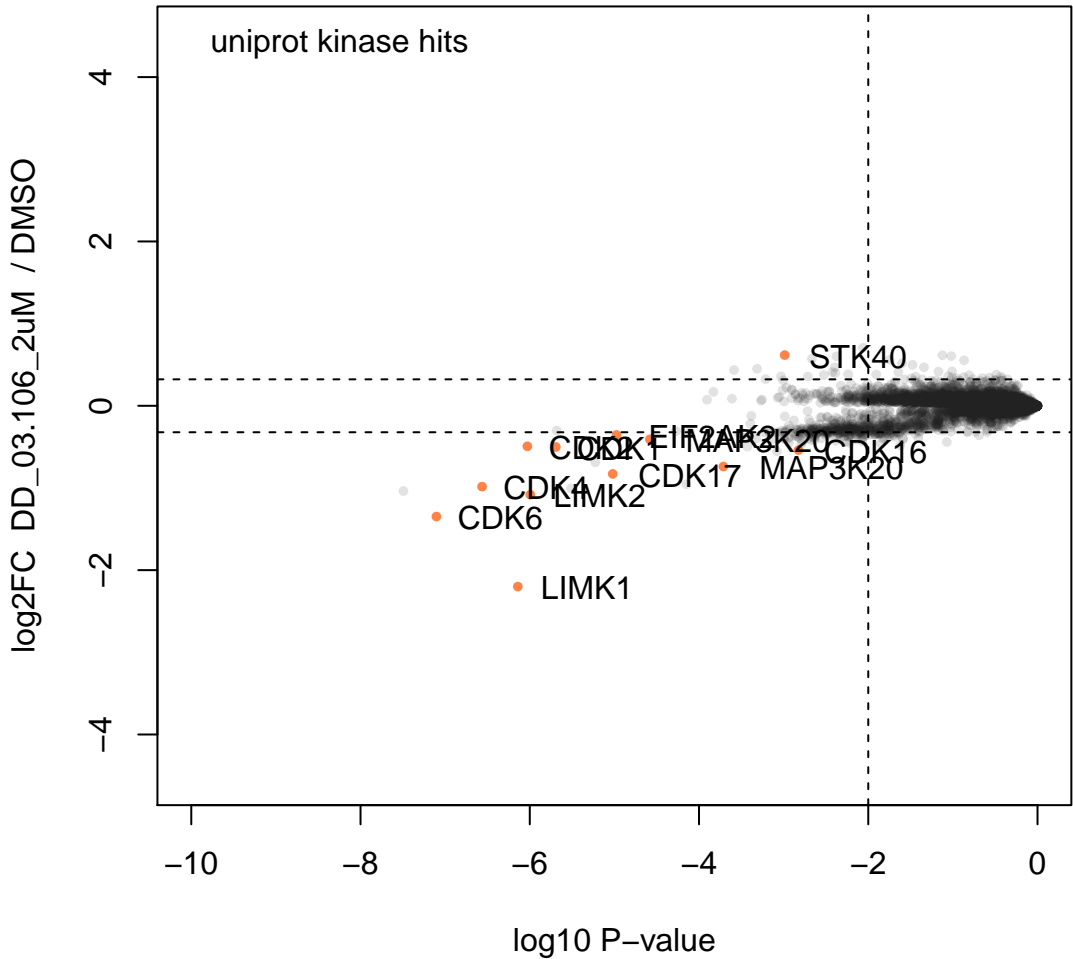

DD.03.106\_4uM (wp147)

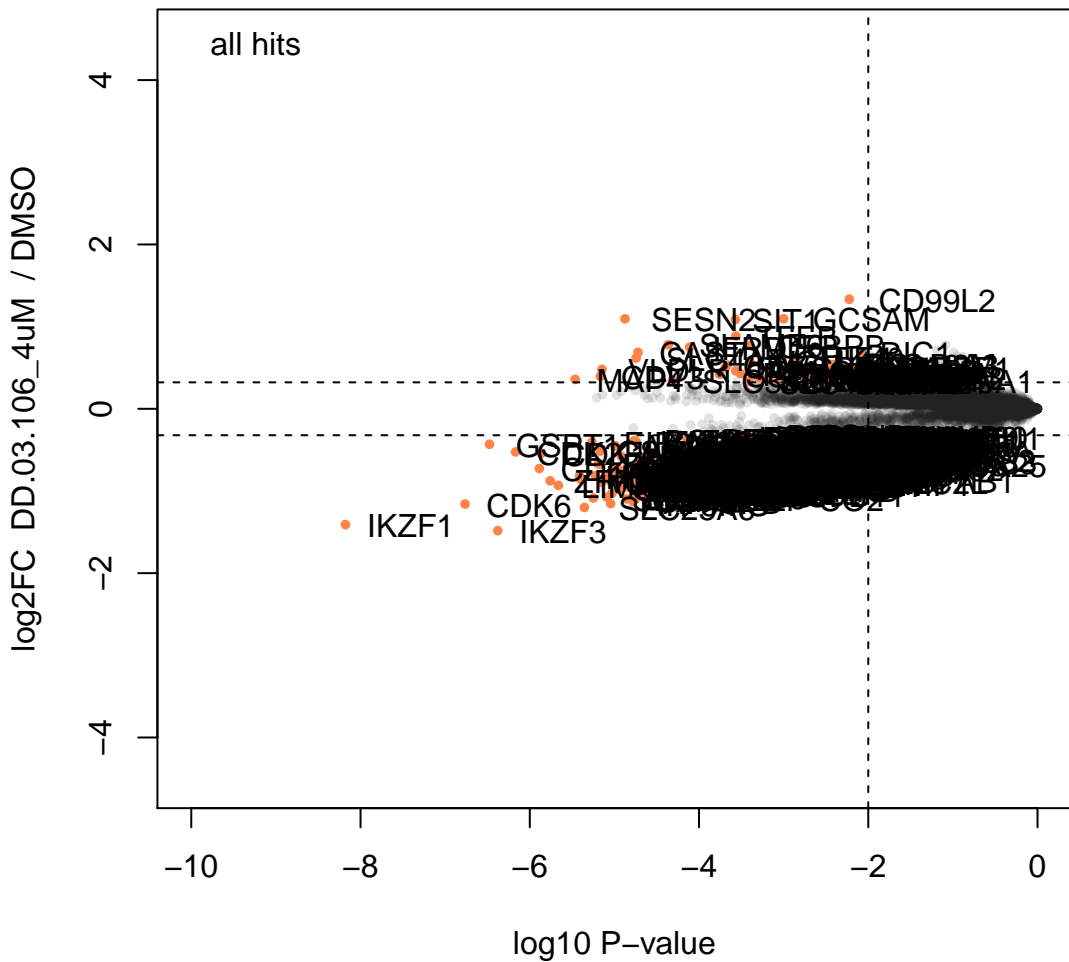

DD.03.106\_4uM (wp147)

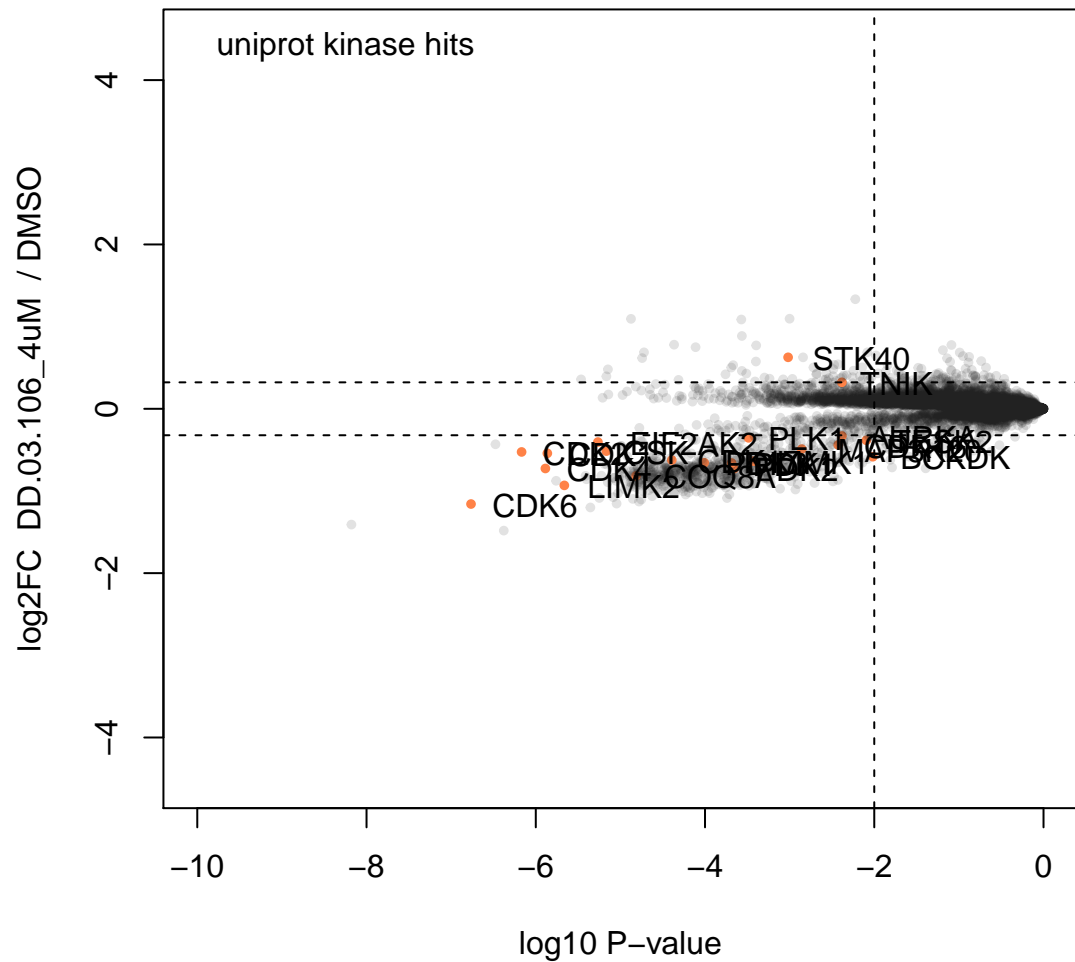

DD.03.107\_1uM (wp147)

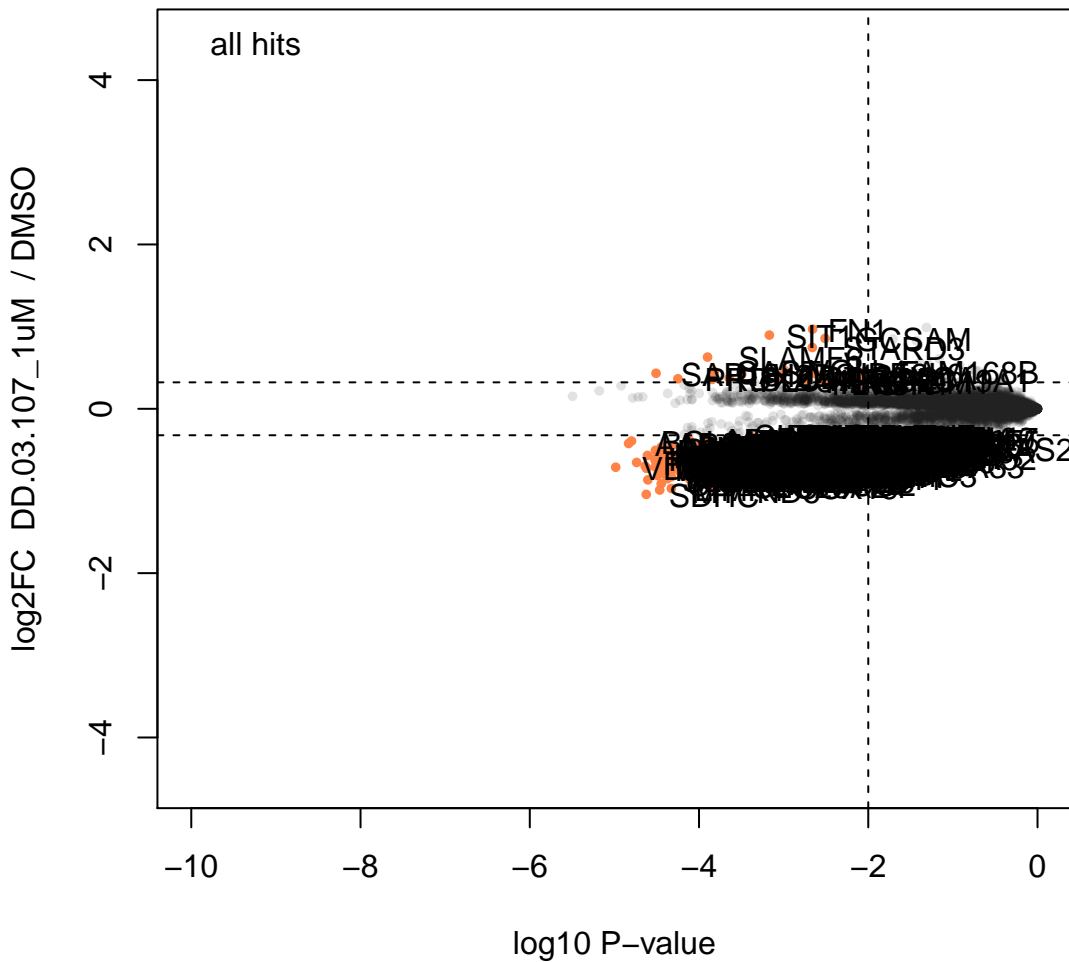

DD.03.107\_1uM (wp147)

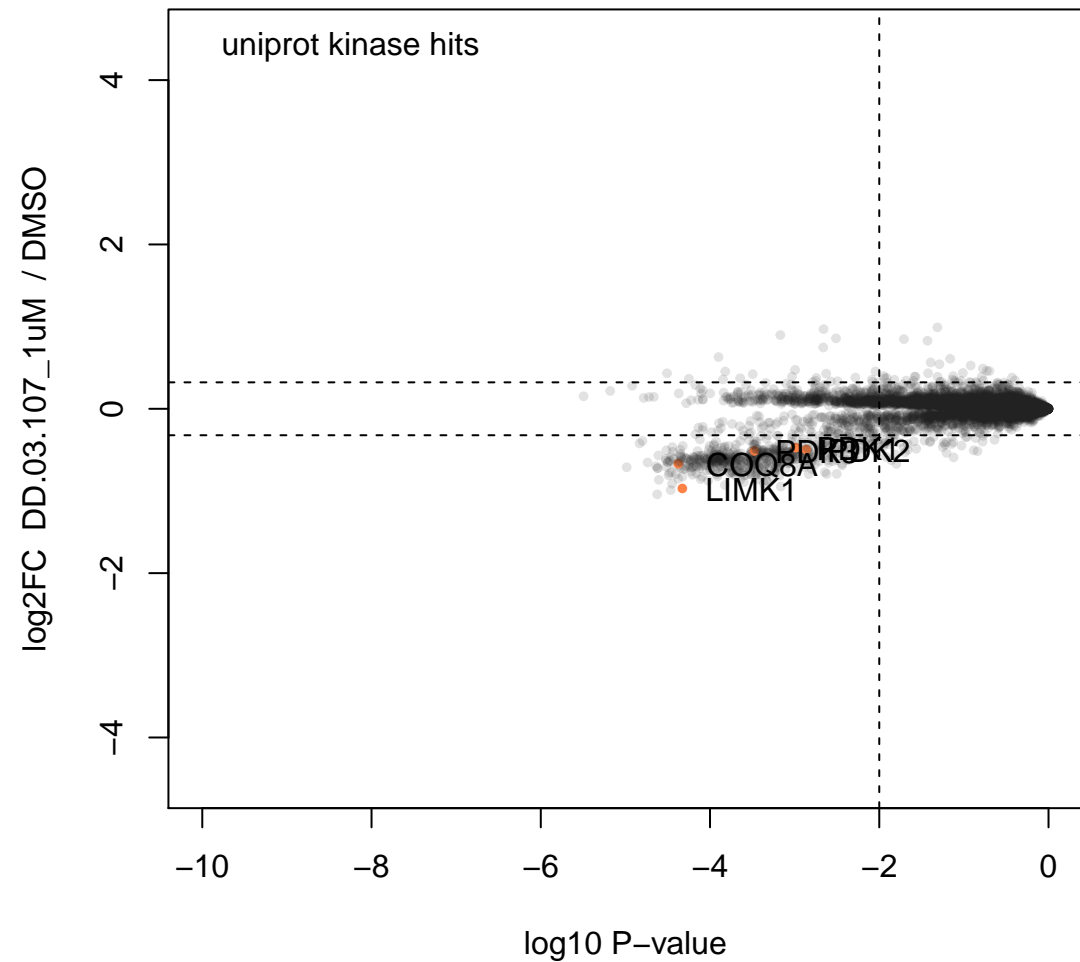

DD.03.107\_2uM (wp147)

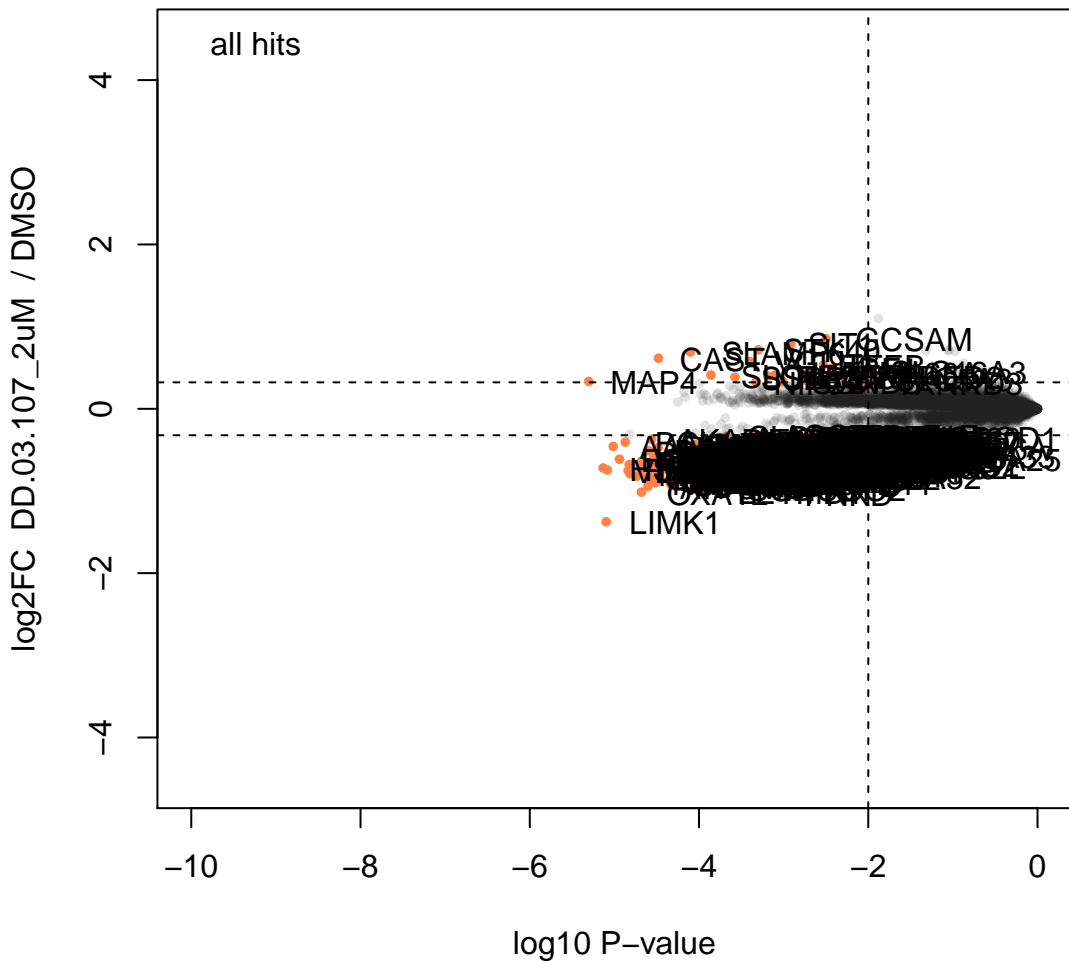

DD.03.107\_2uM (wp147)

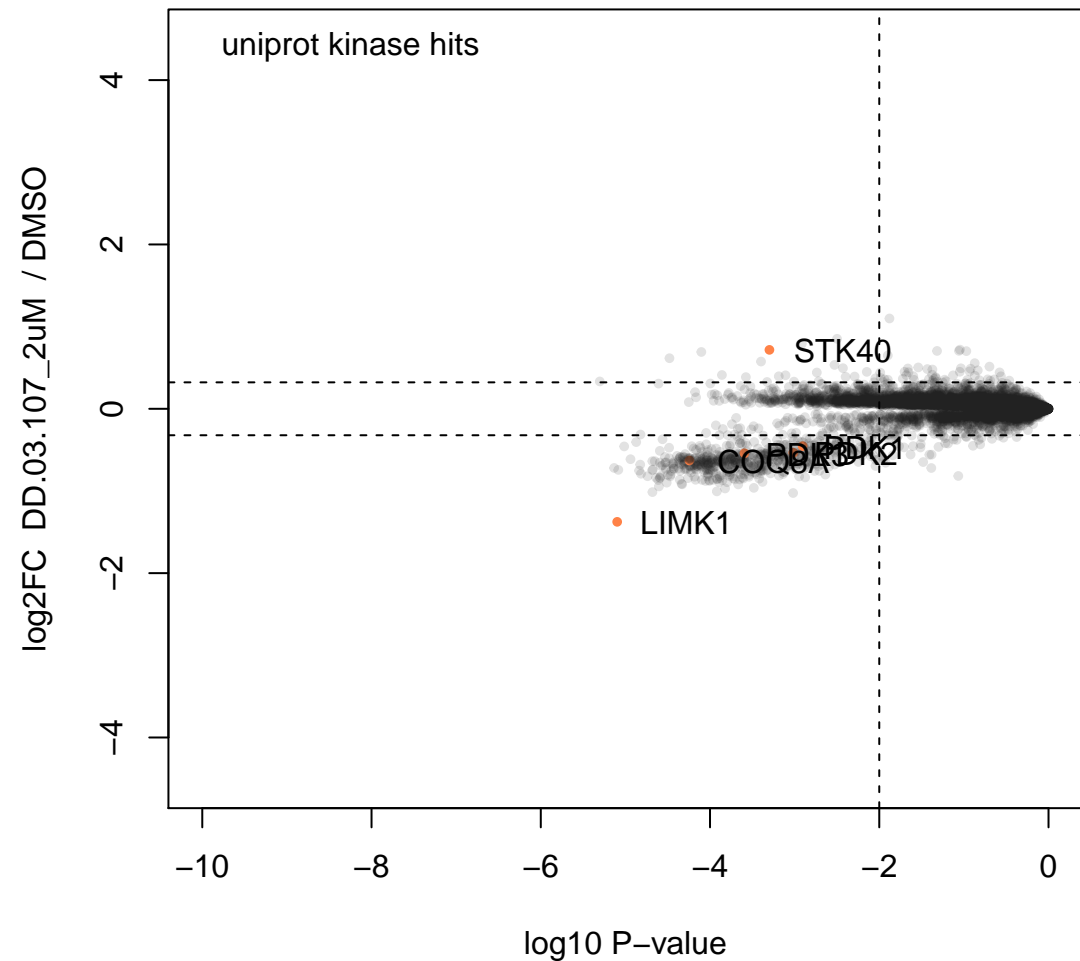



DD.03.107\_4uM (wp147)

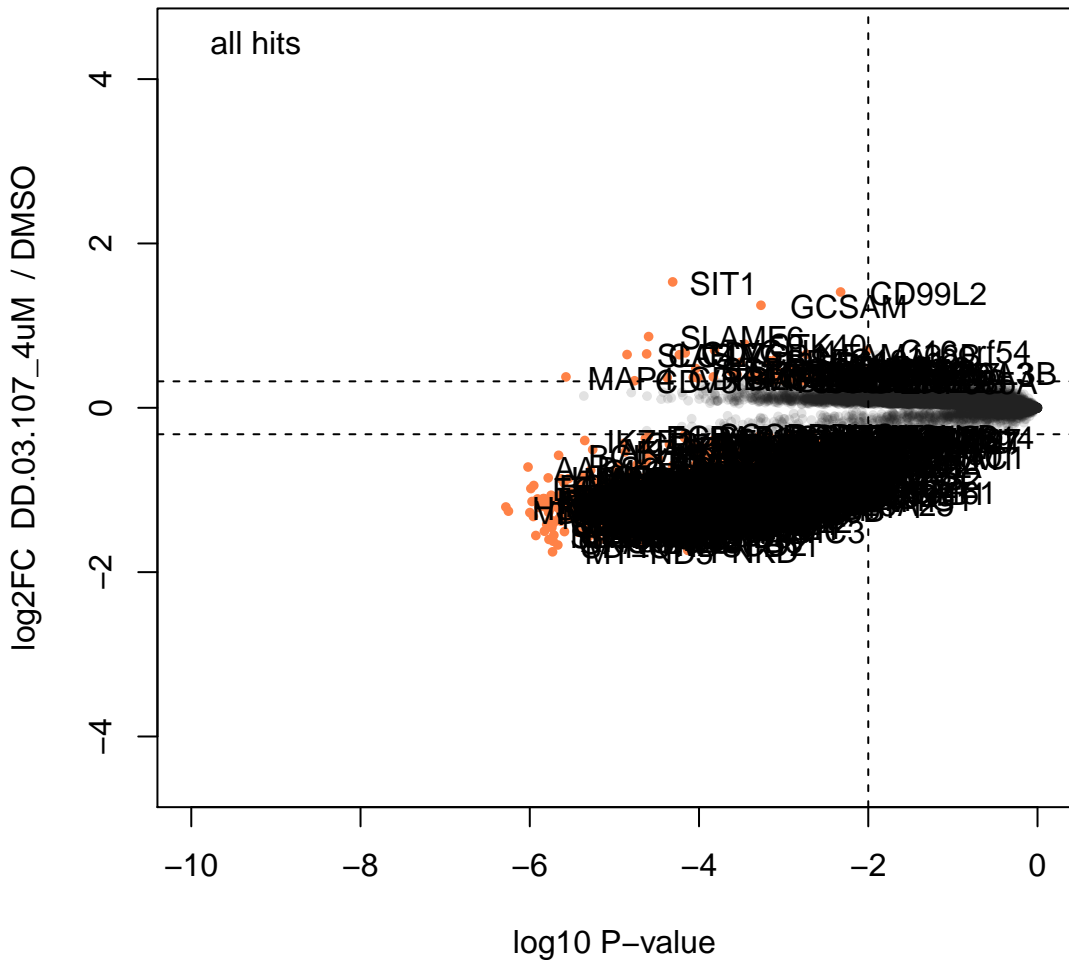

DD.03.107\_4uM (wp147)

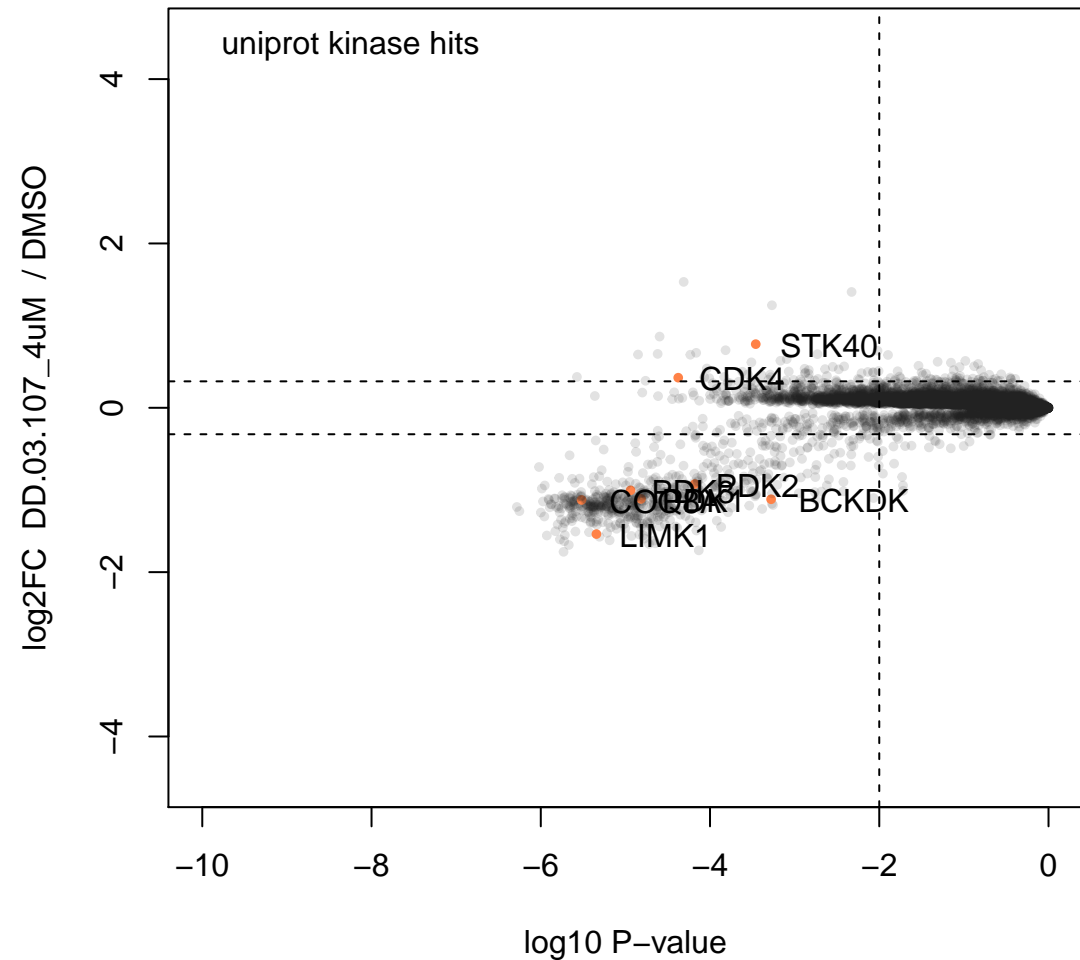

ZNL.03.127 (wp149)

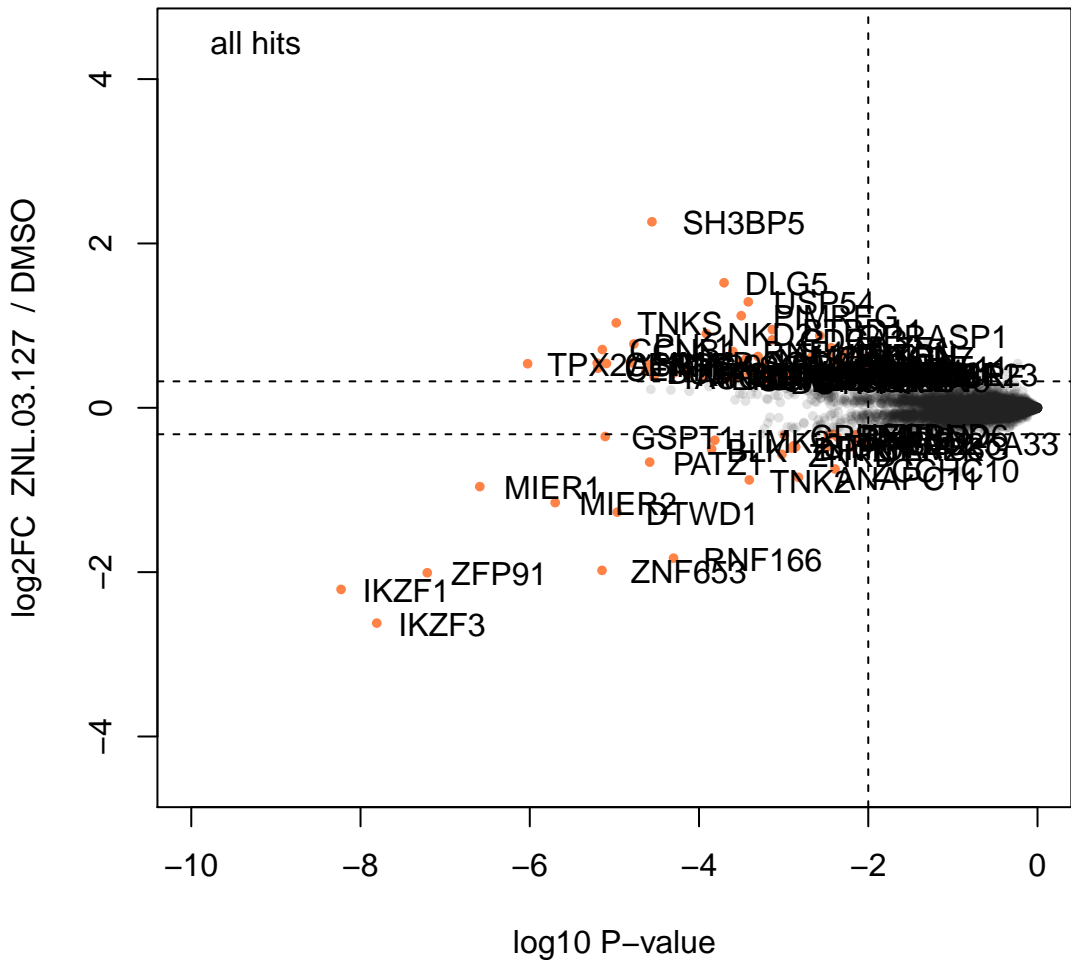

ZNL.03.127 (wp149)

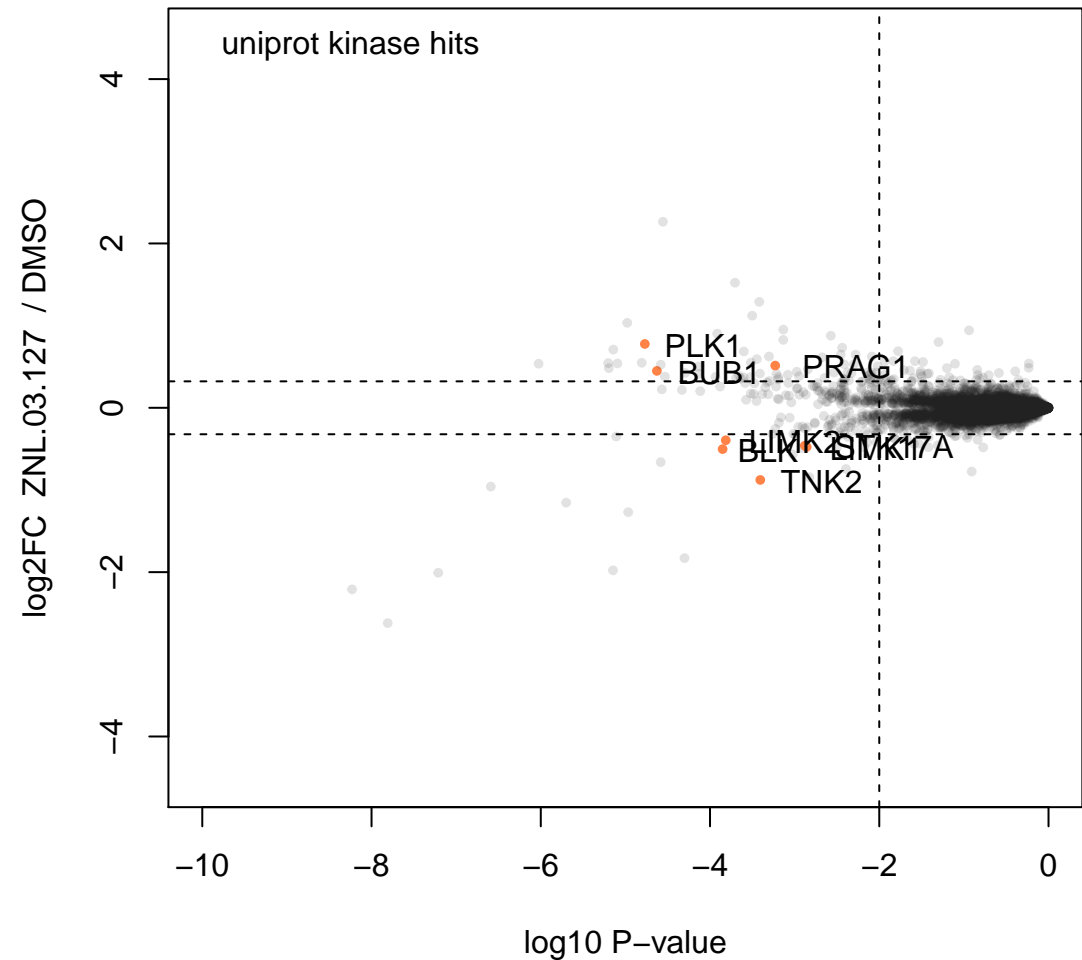

DB0646 (wp152)

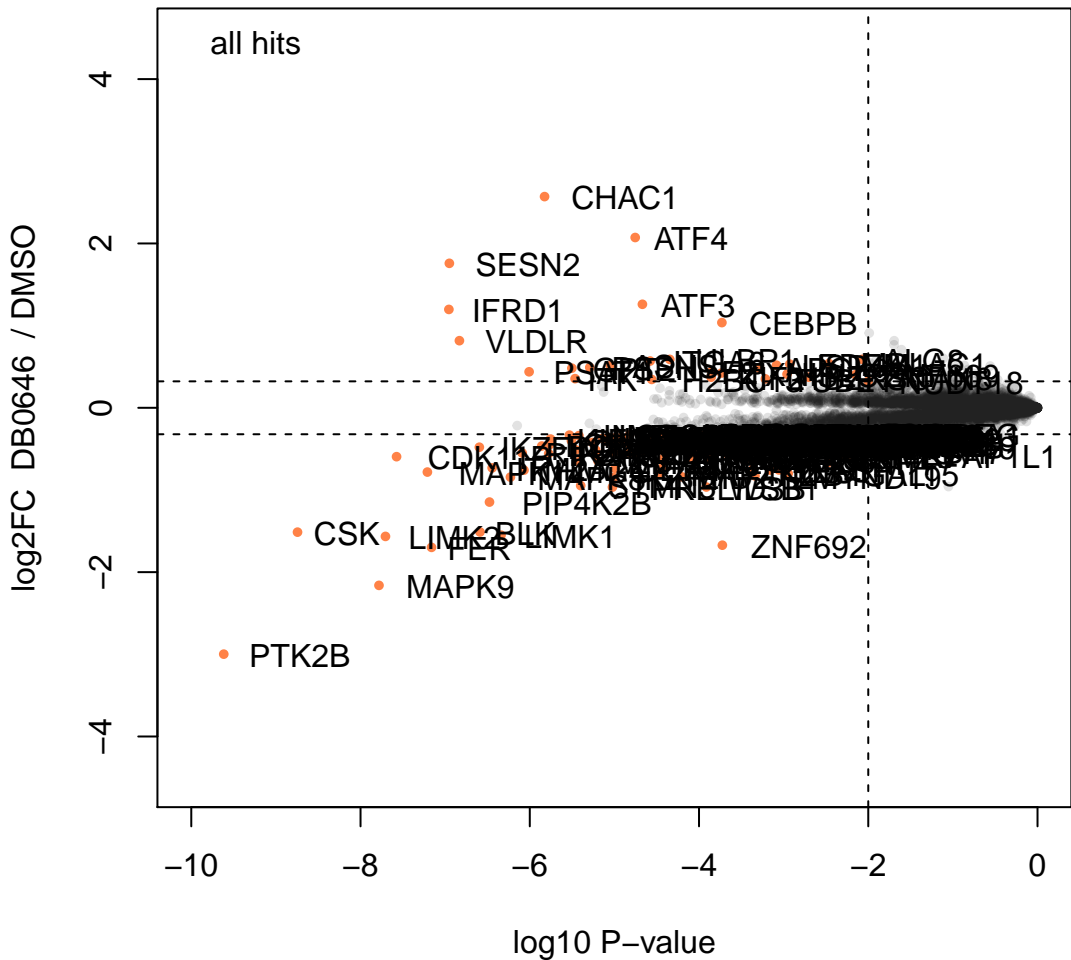

DB0646 (wp152)

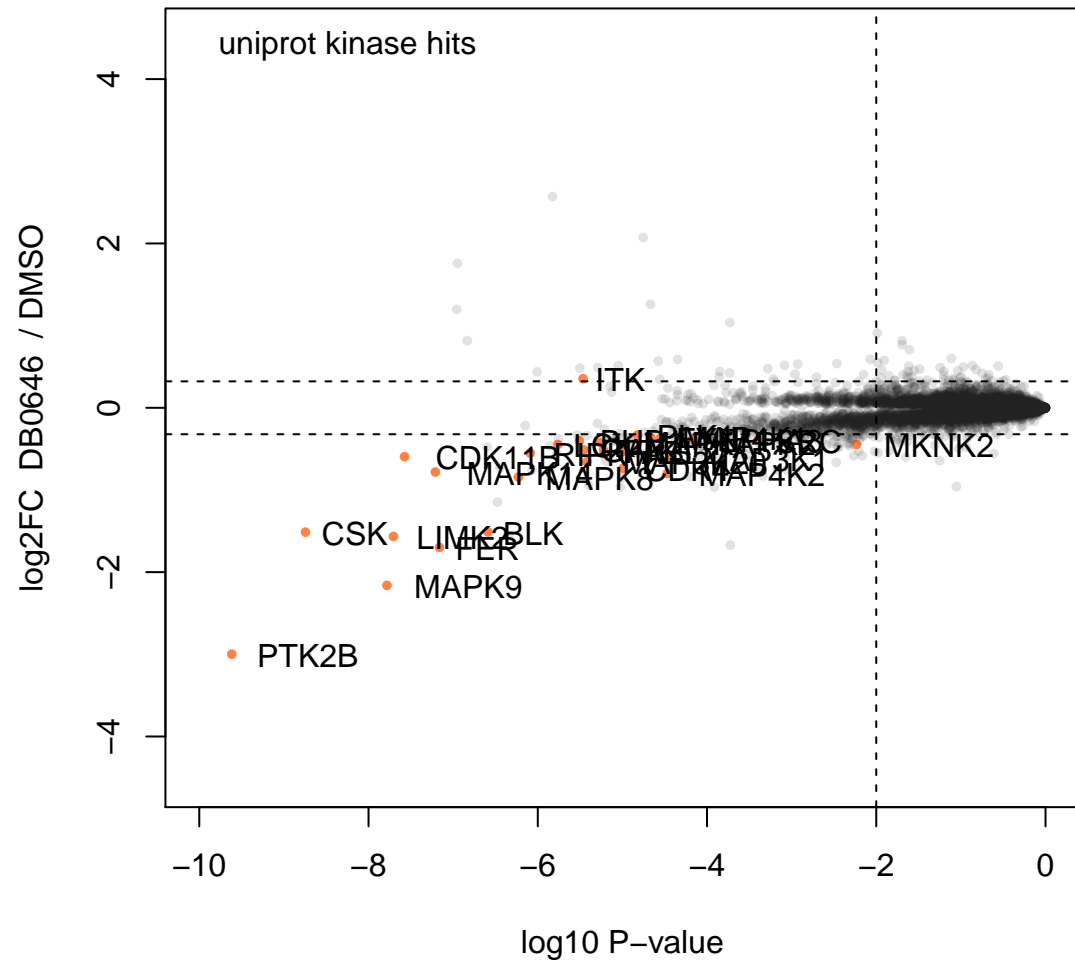

DB1114 (wp152)

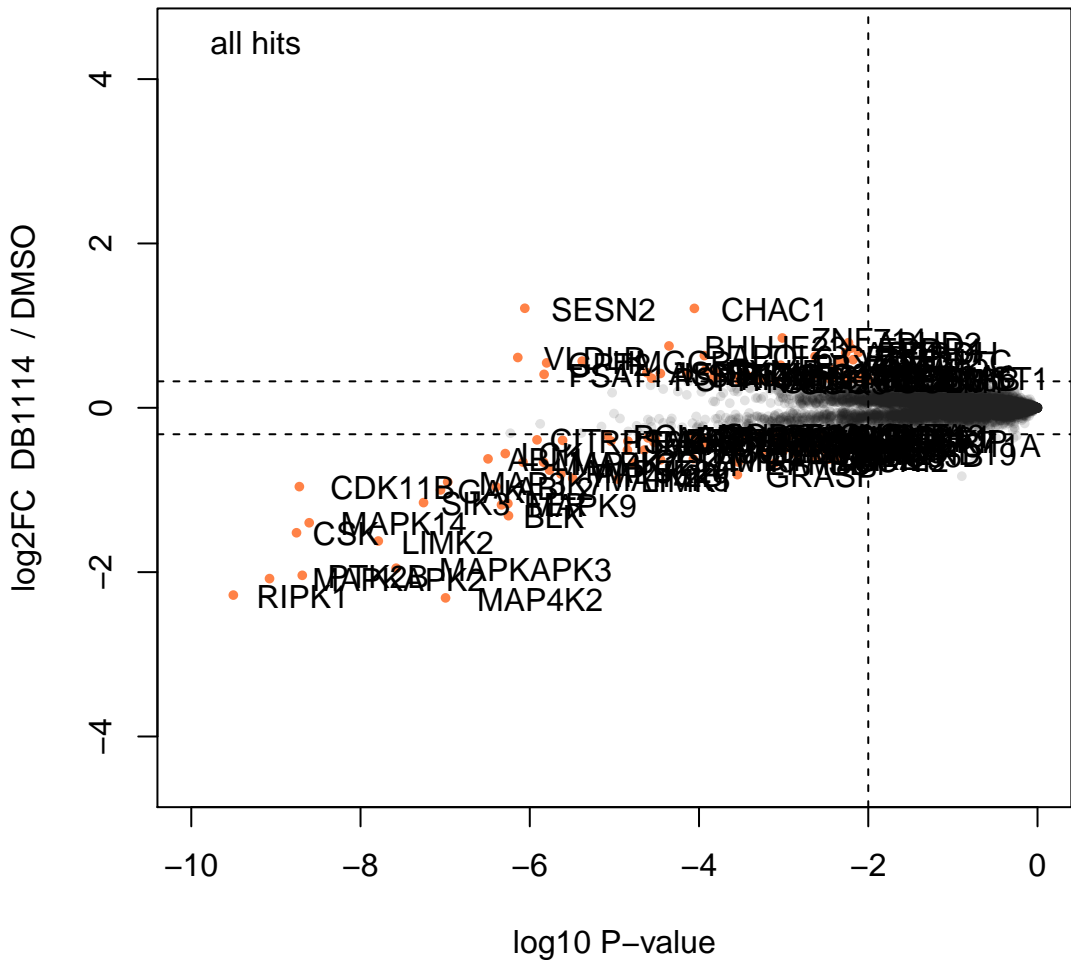

DB1114 (wp152)

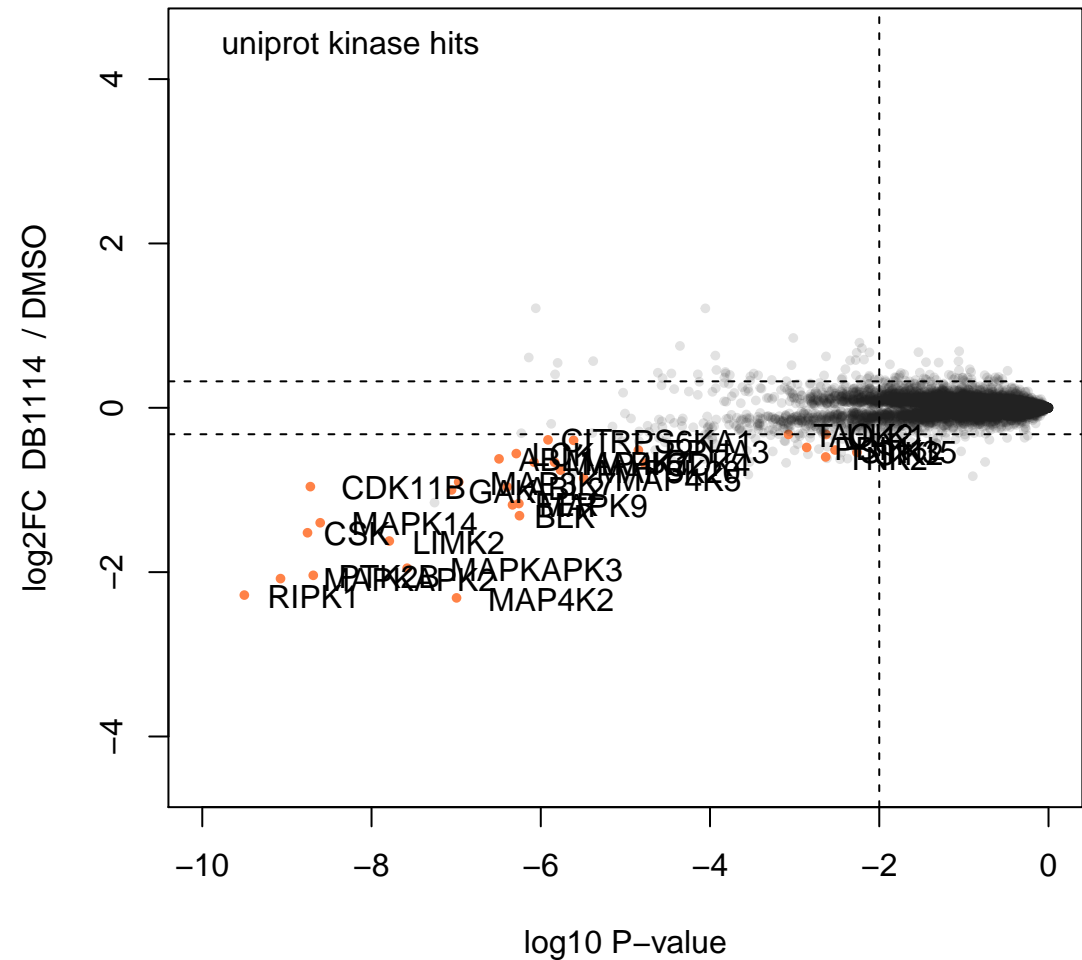

### DB118430 (wp152)

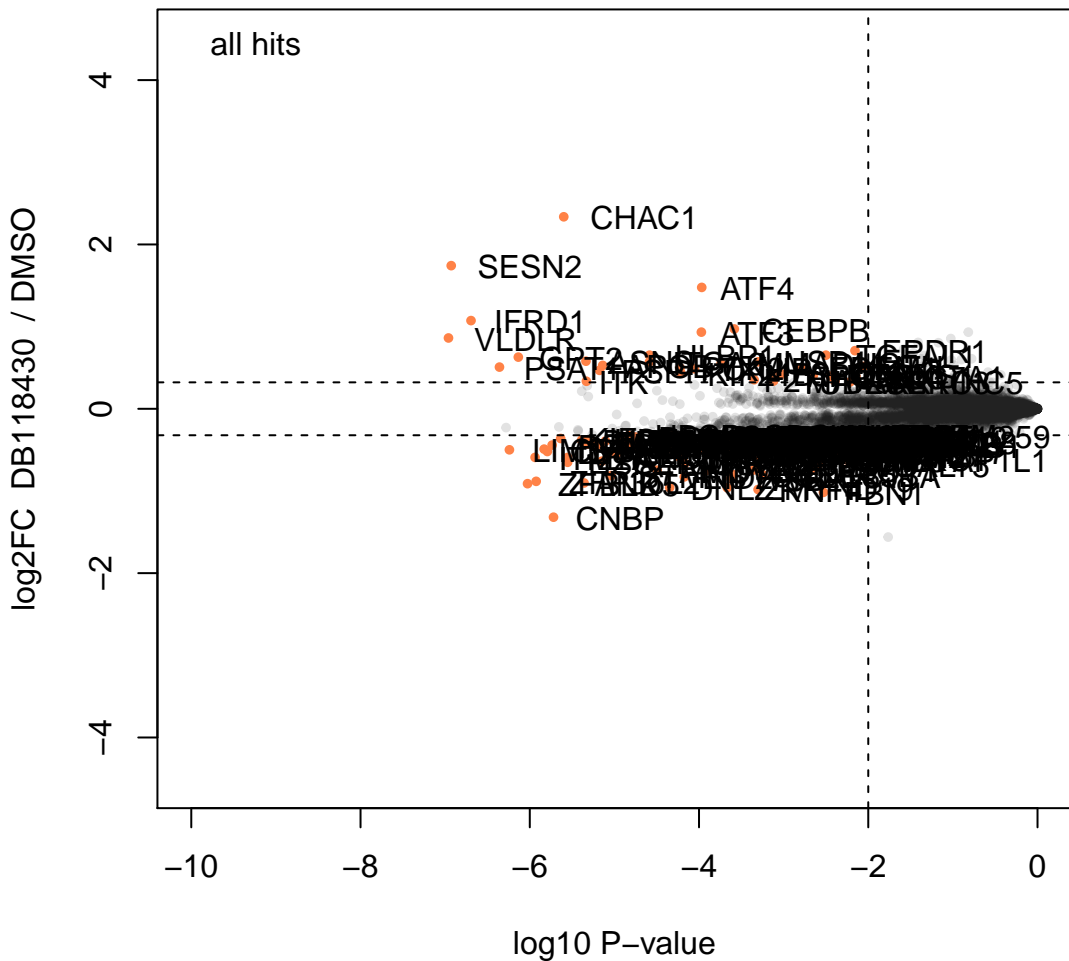

### DB118430 (wp152)

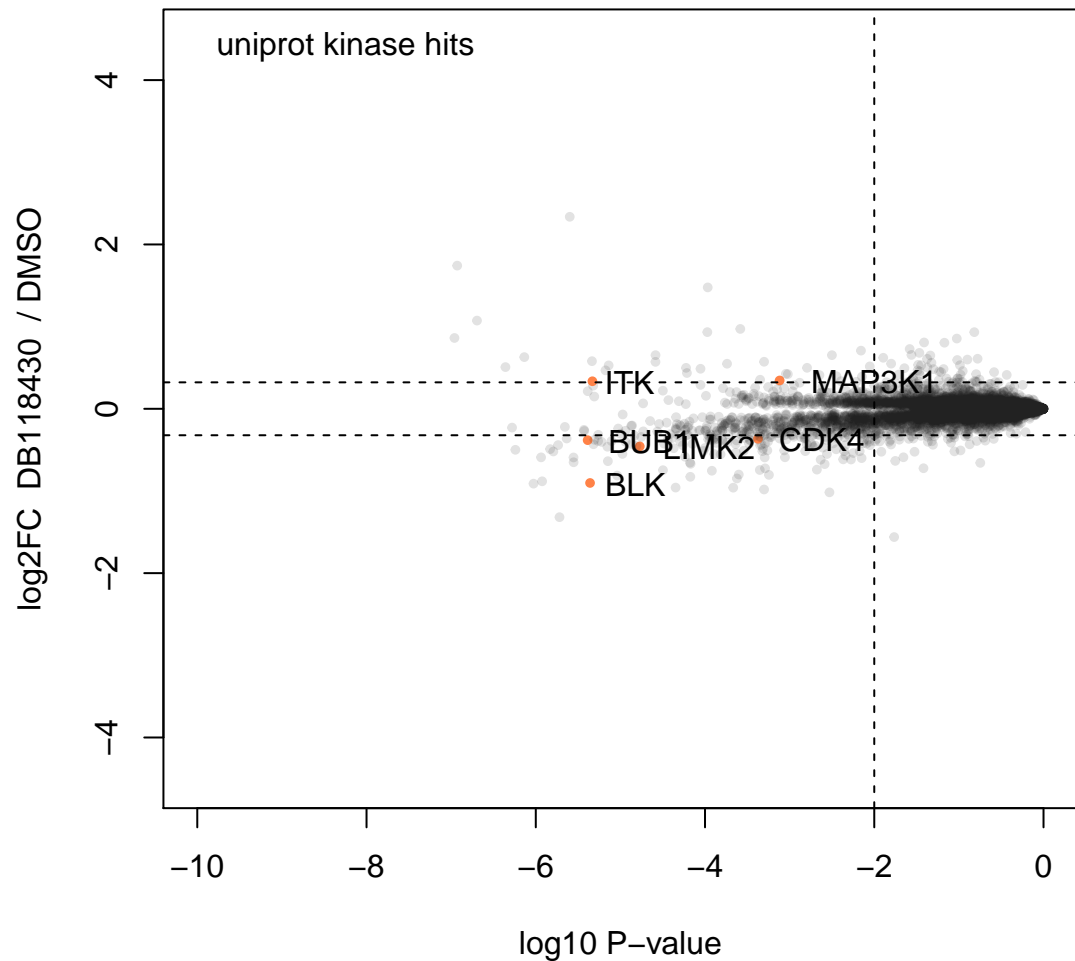

DB0646\_1hr (wp160)

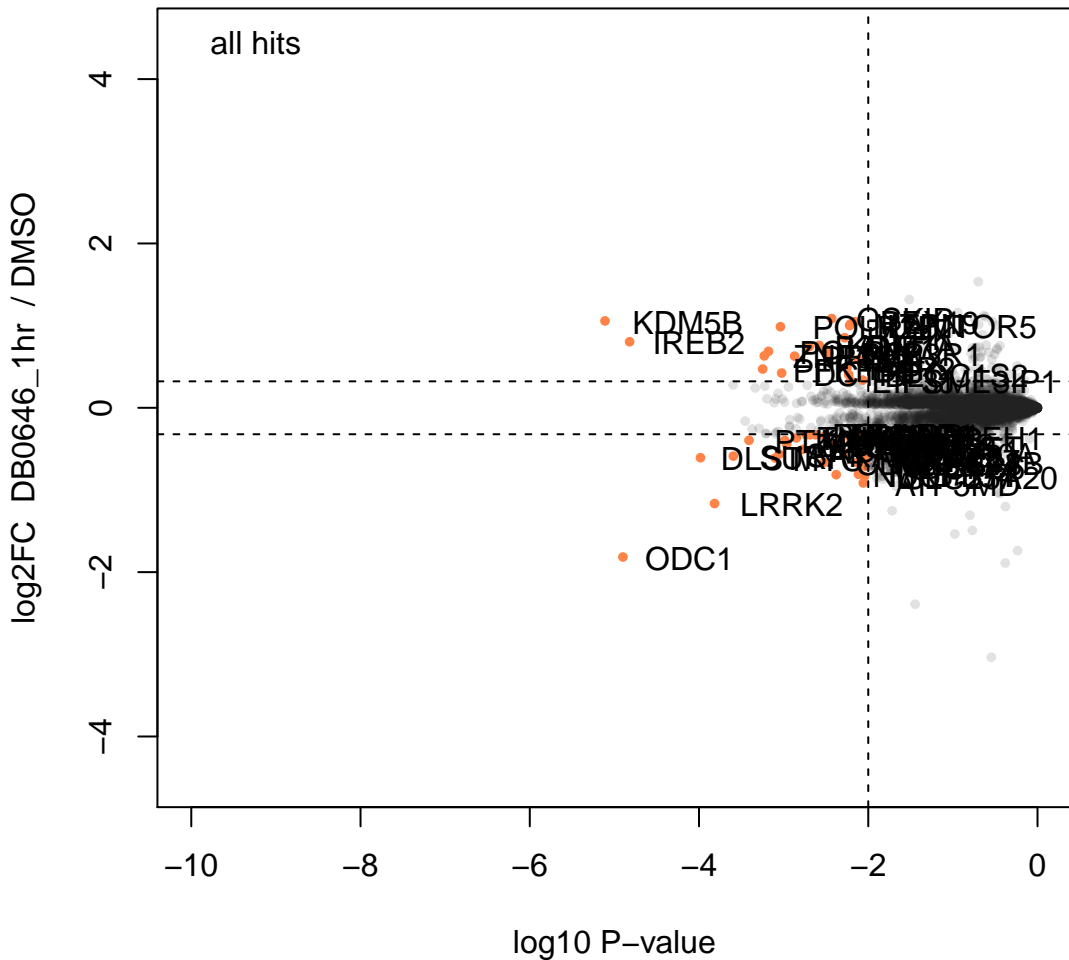

DB0646\_1hr (wp160)

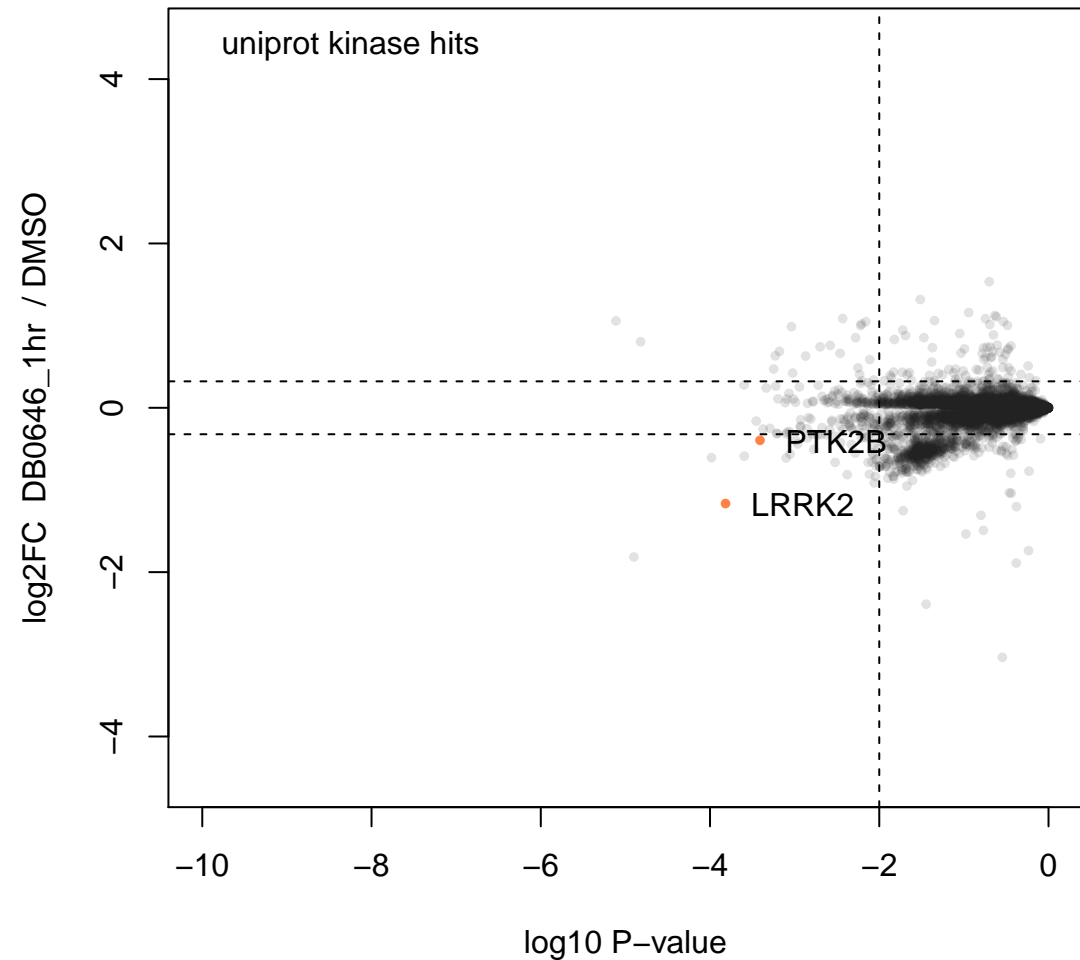







DB0646\_8hr (wp160)

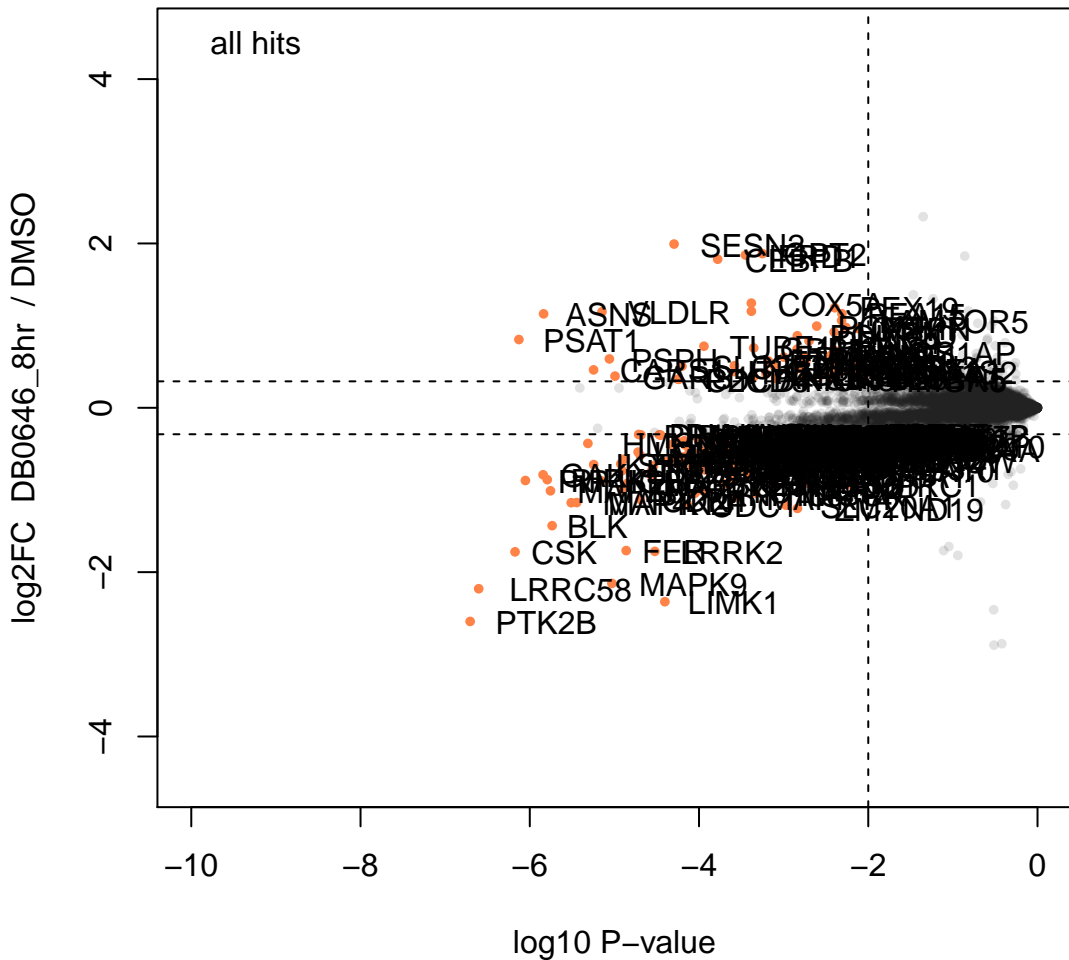

DB0646\_8hr (wp160)

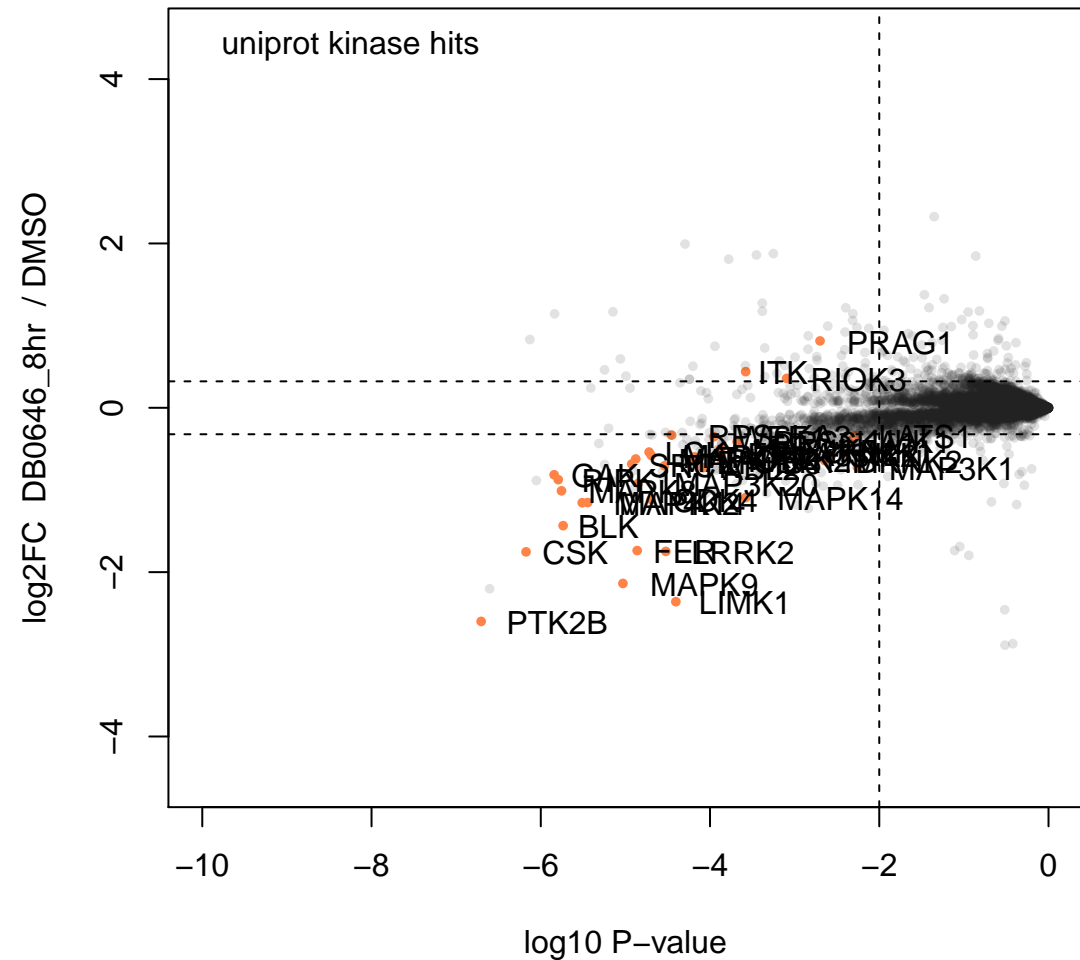

SK.3.91\_1hr (wp160)

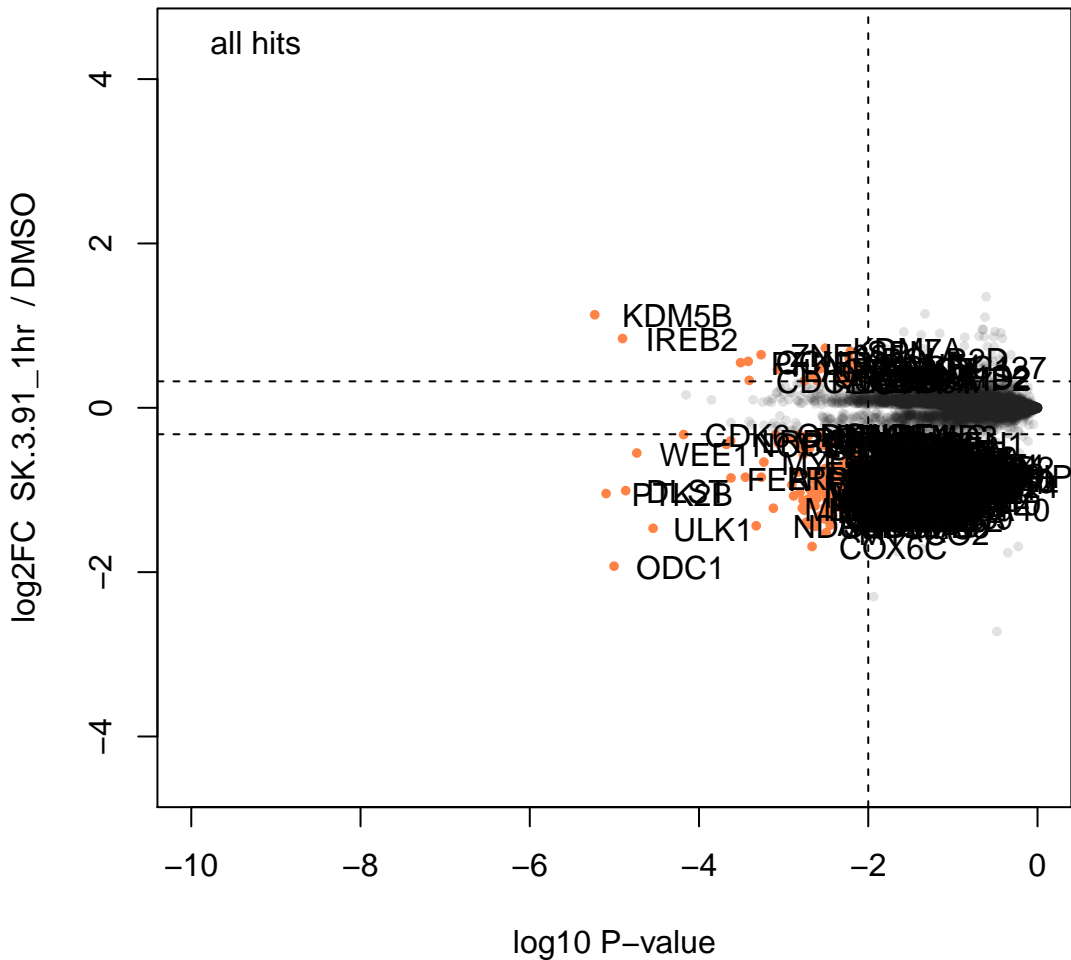

SK.3.91\_1hr (wp160)

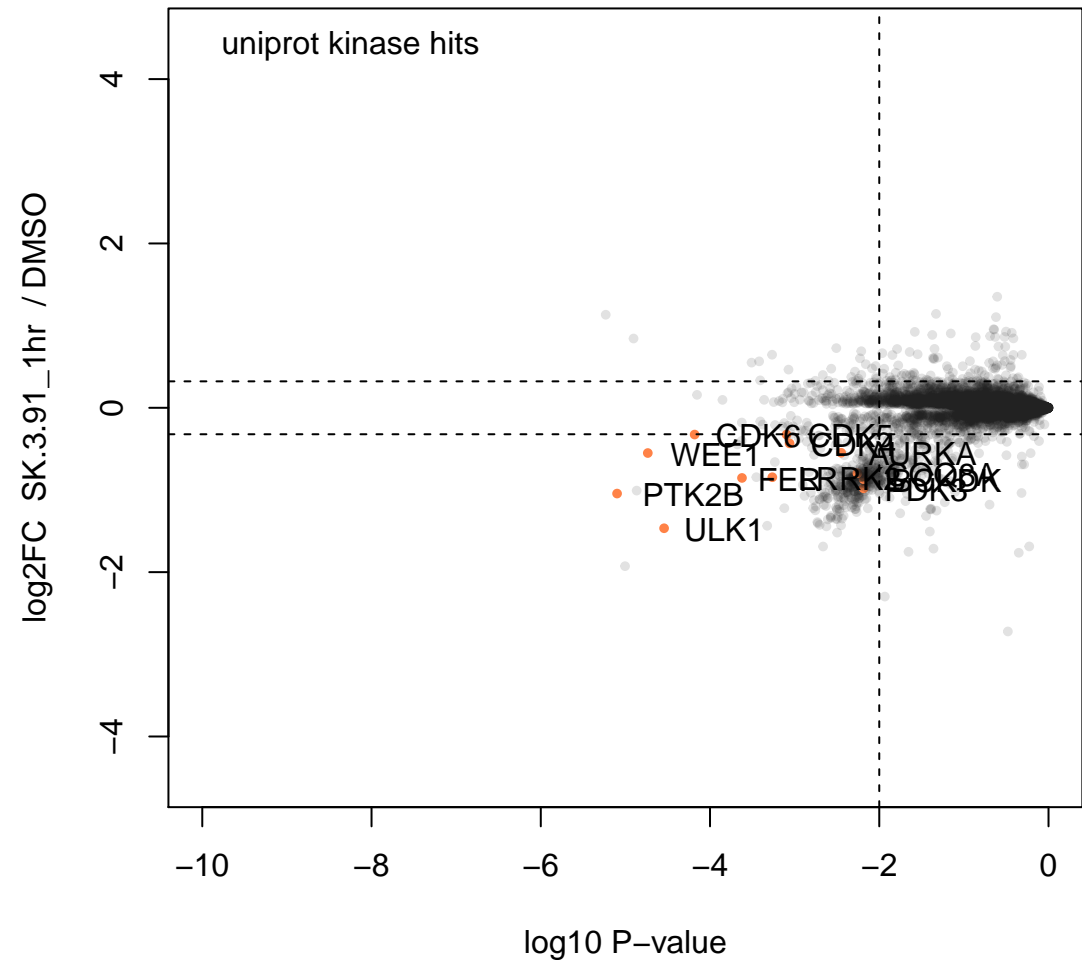

SK.3.91\_2hr (wp160)

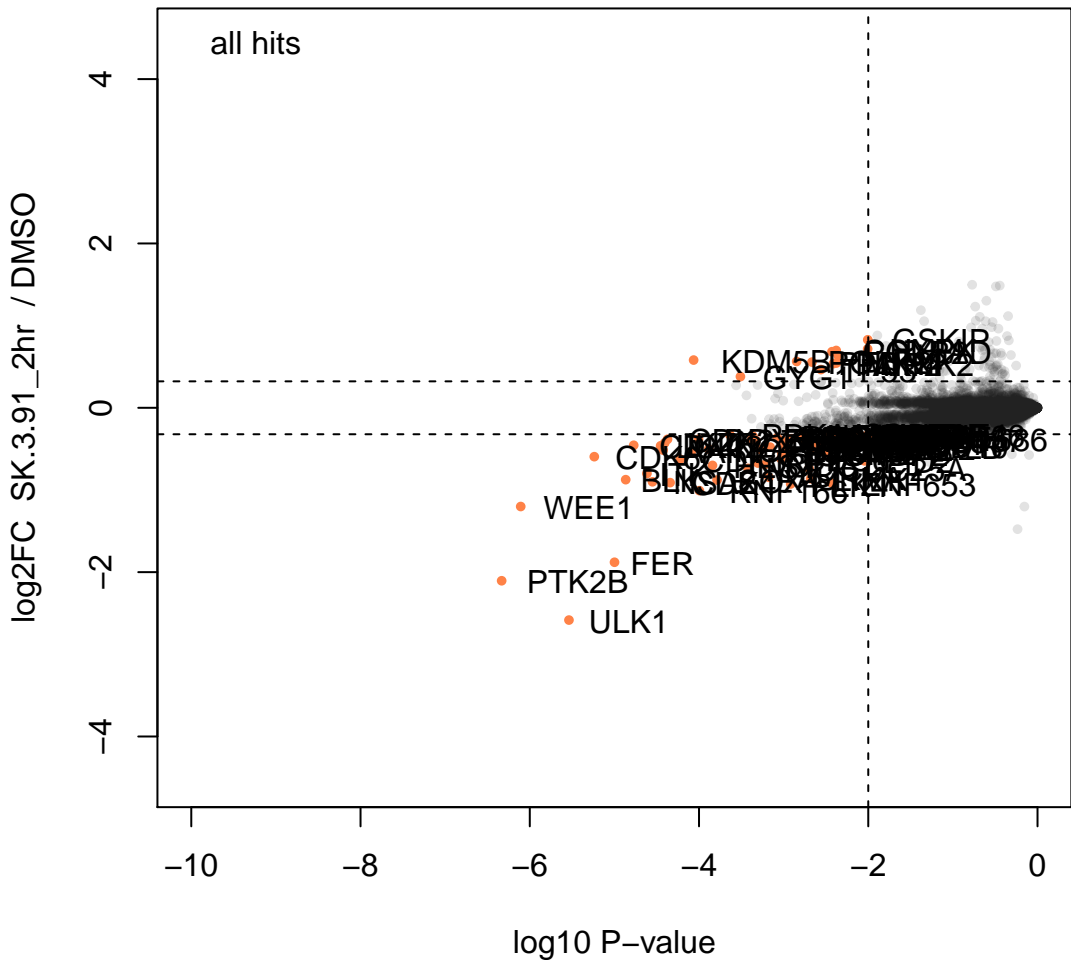

SK.3.91\_2hr (wp160)

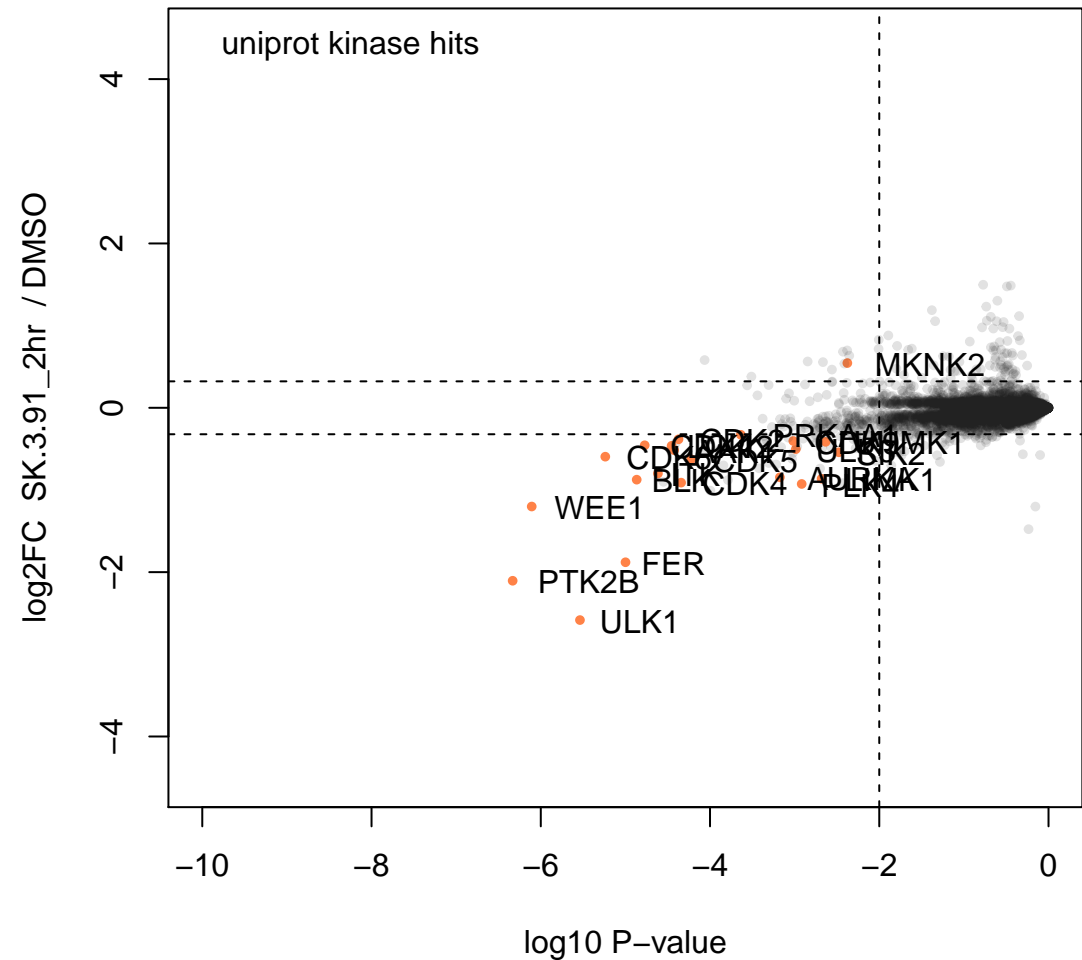

SK.3.91\_4hr (wp160)

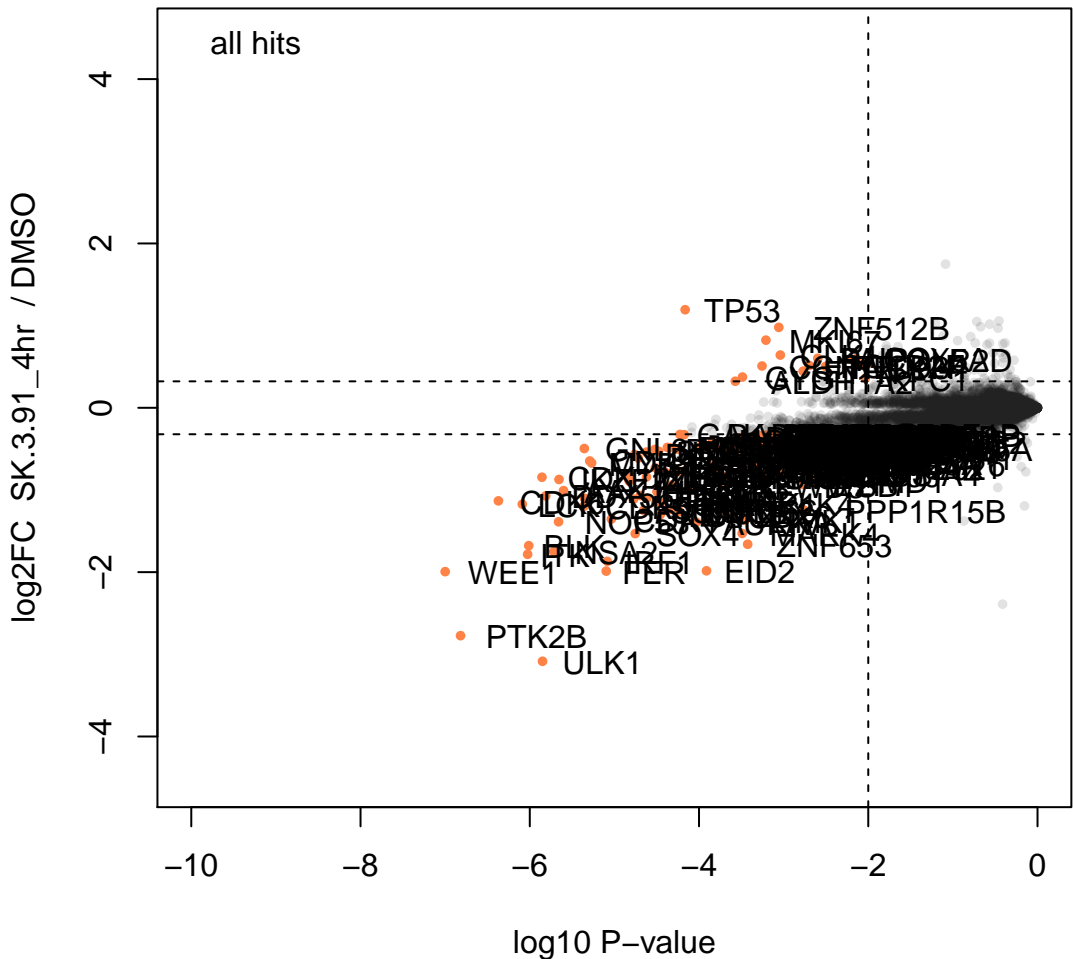

SK.3.91\_4hr (wp160)

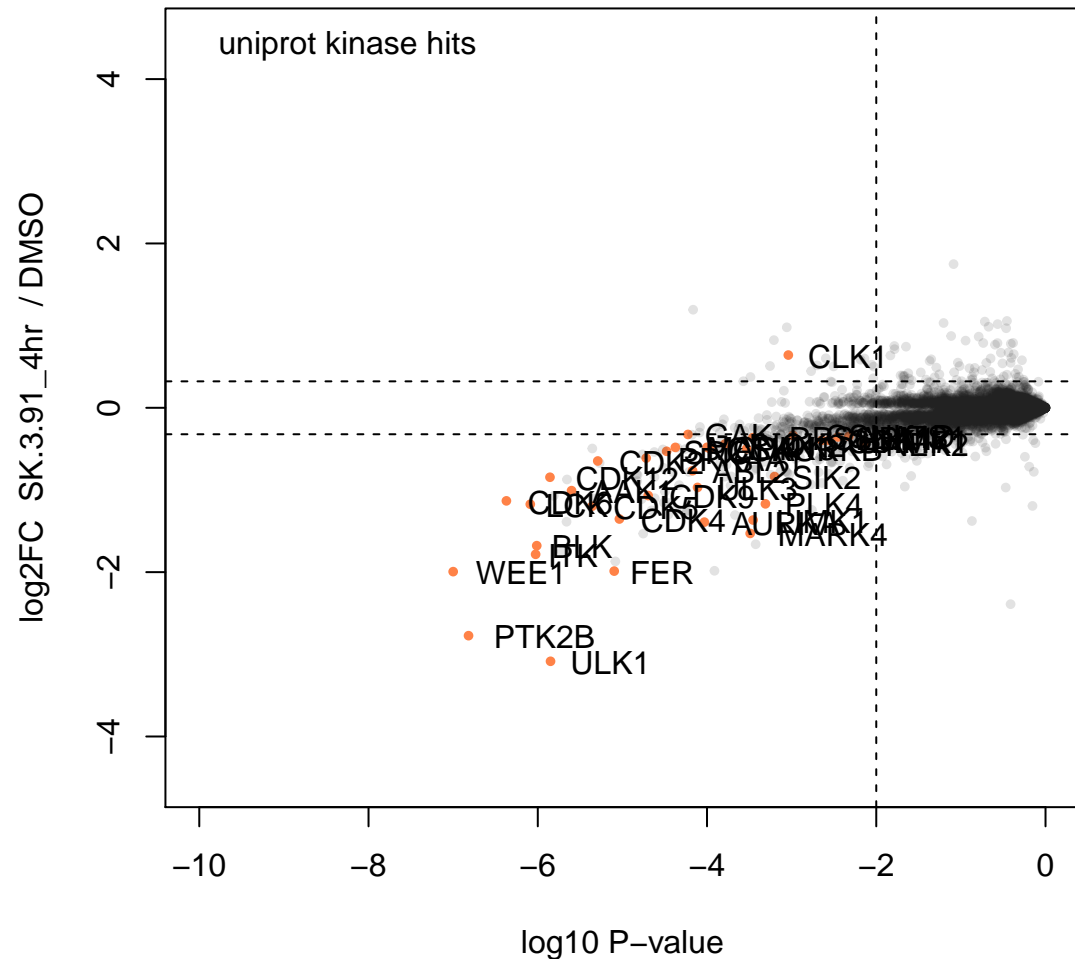

BJG.04.201 (wp161)

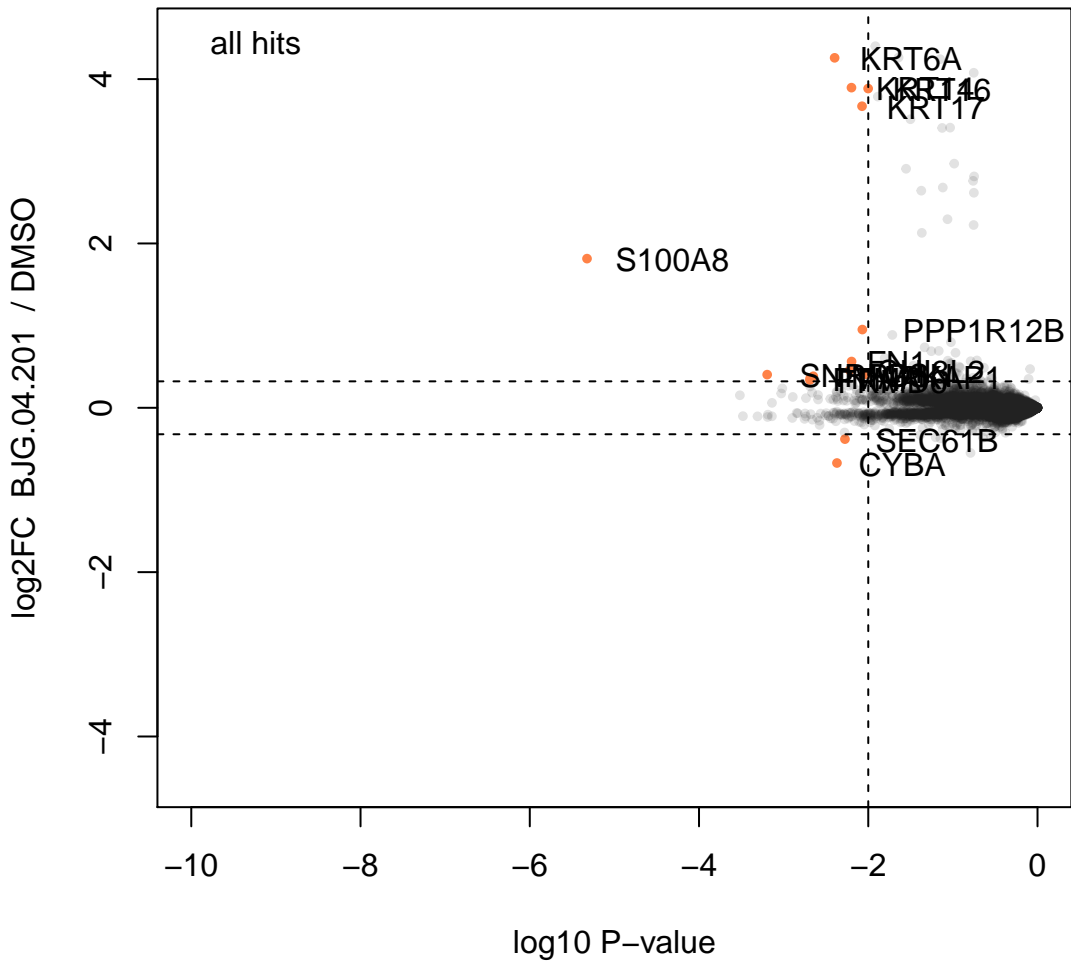

BJG.04.201 (wp161)

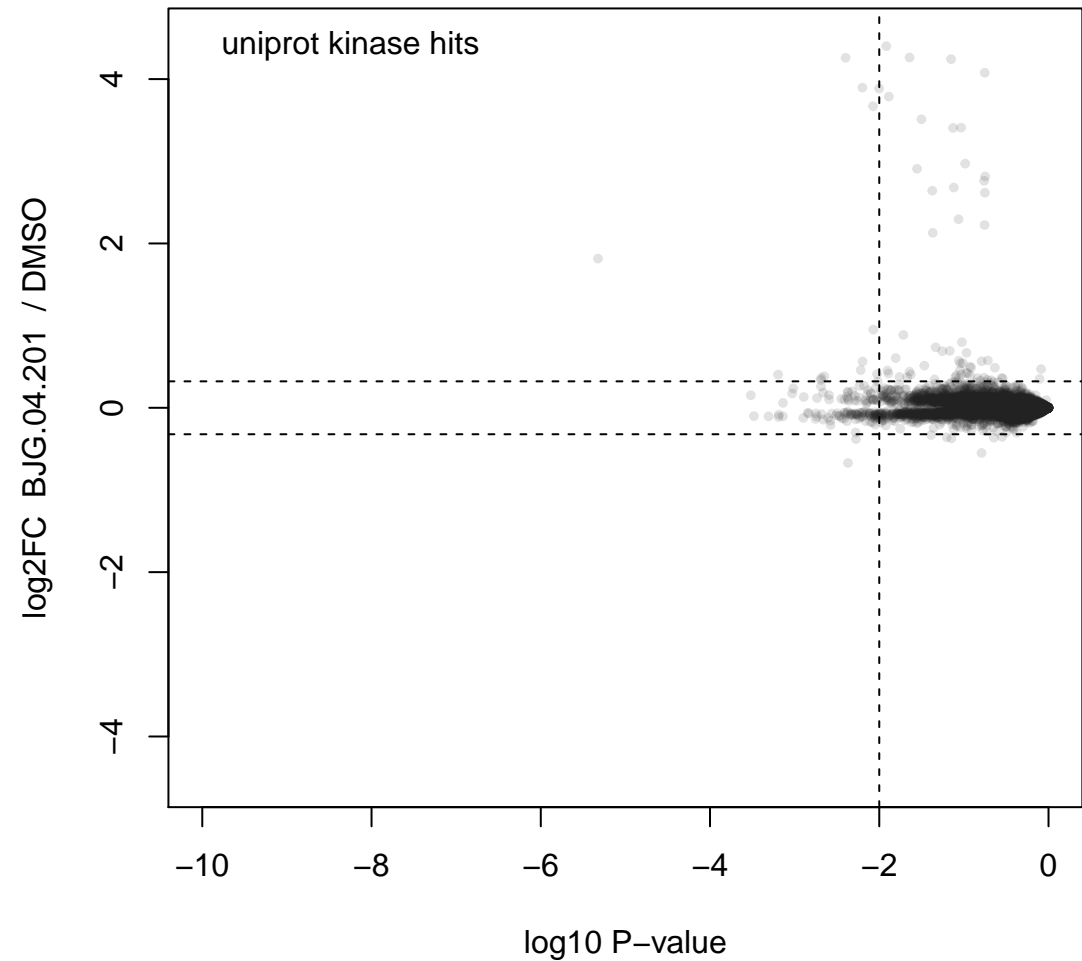

BJG.04.202 (wp161)

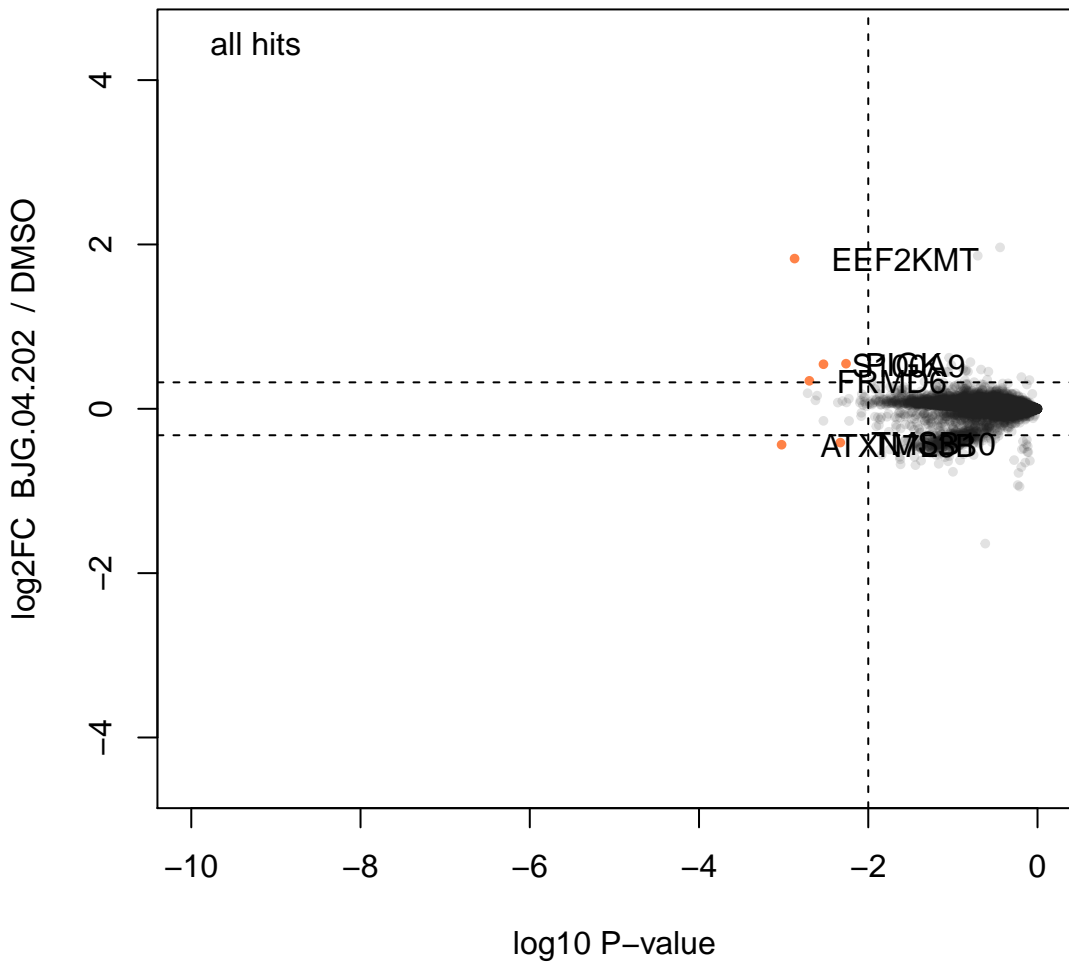

BJG.04.202 (wp161)

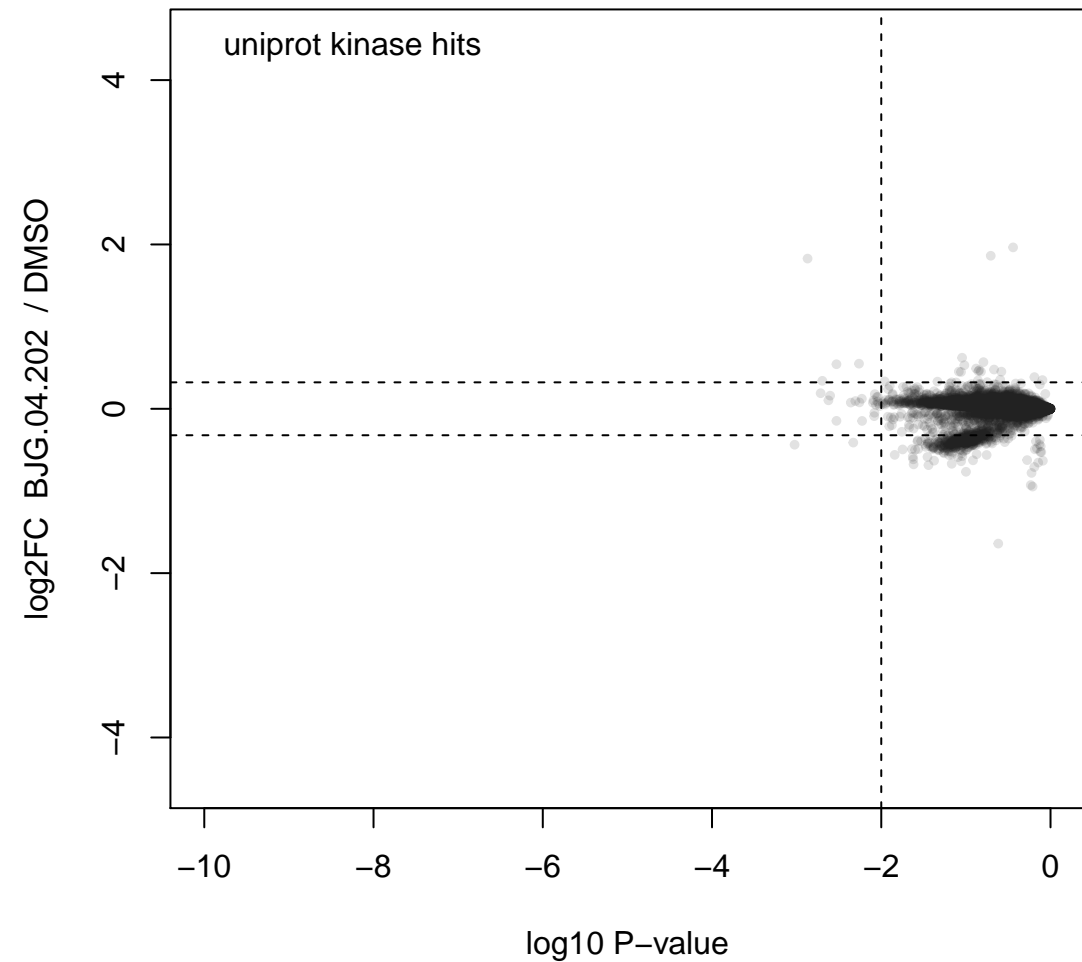

SB1.G.194 (wp164)

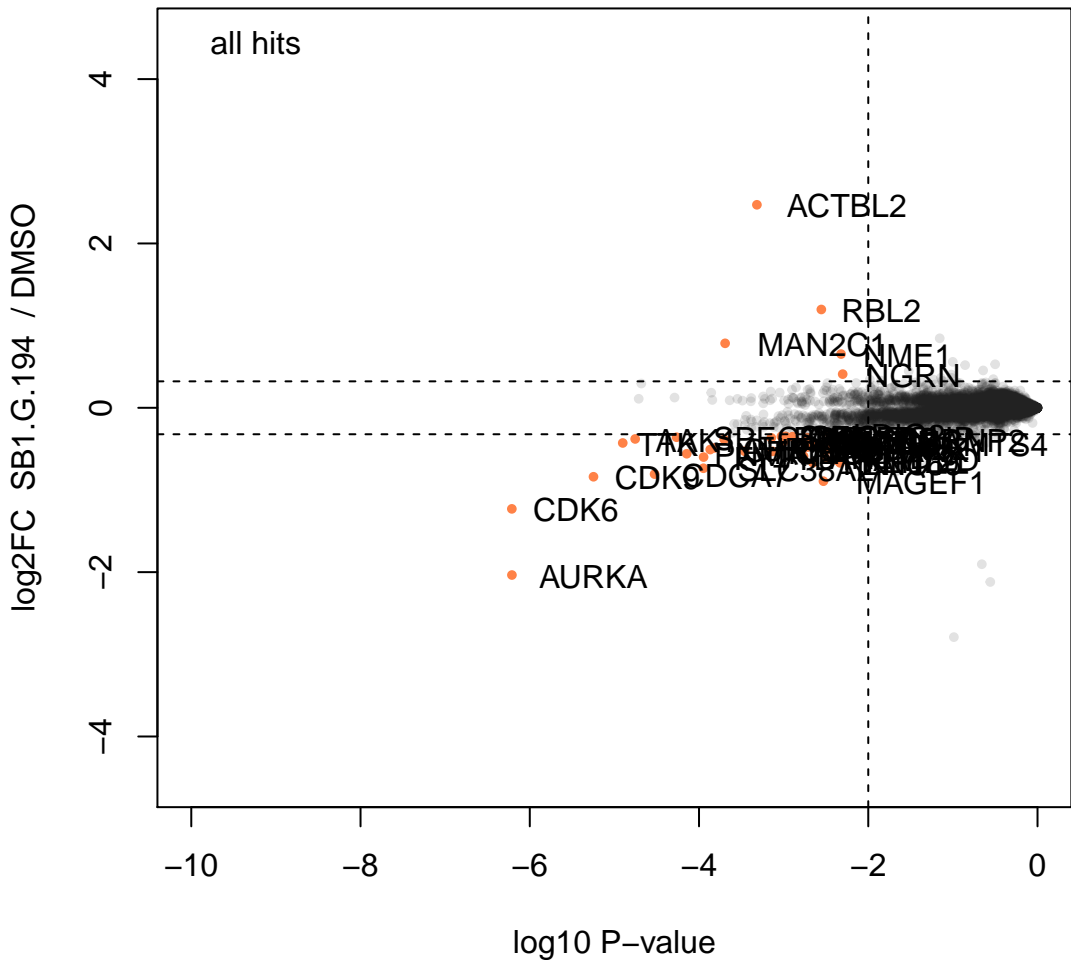

SB1.G.194 (wp164)

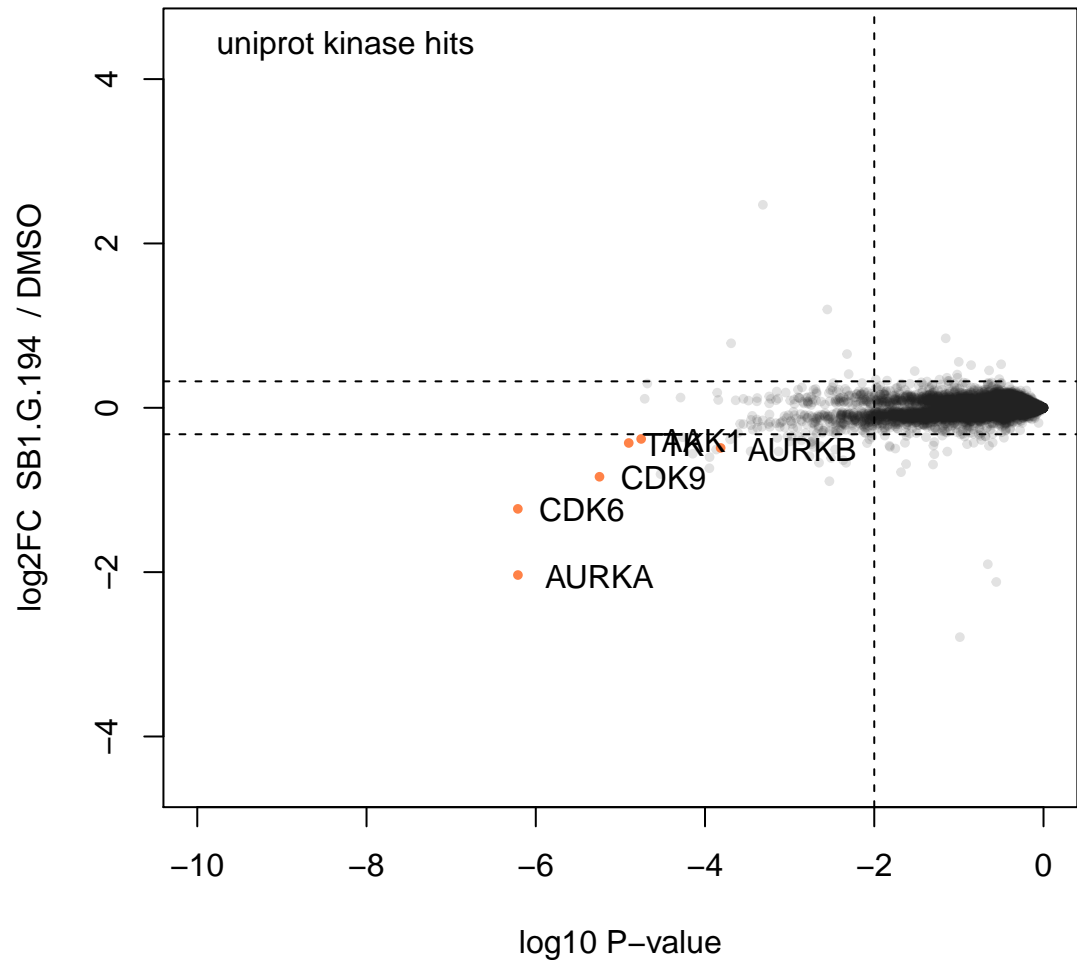

DB0661 (wp168)

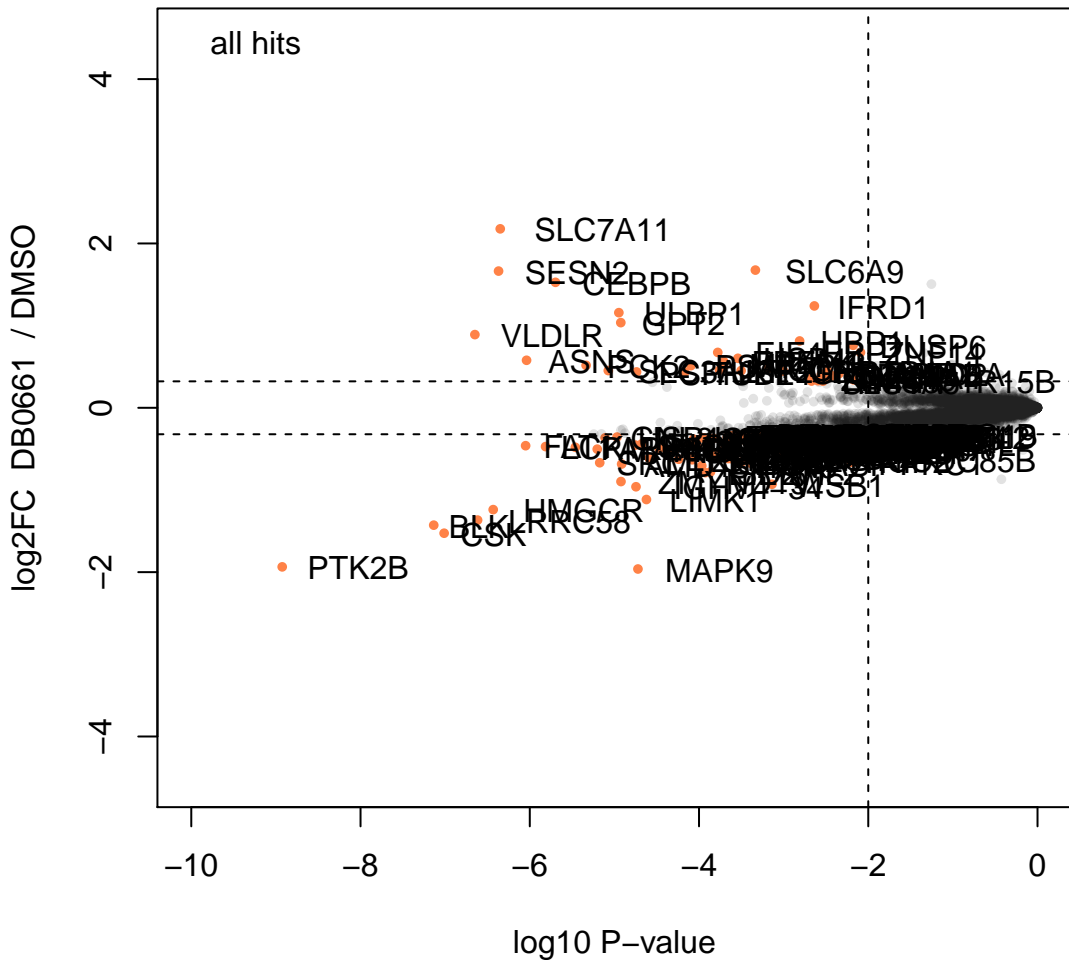

DB0661 (wp168)

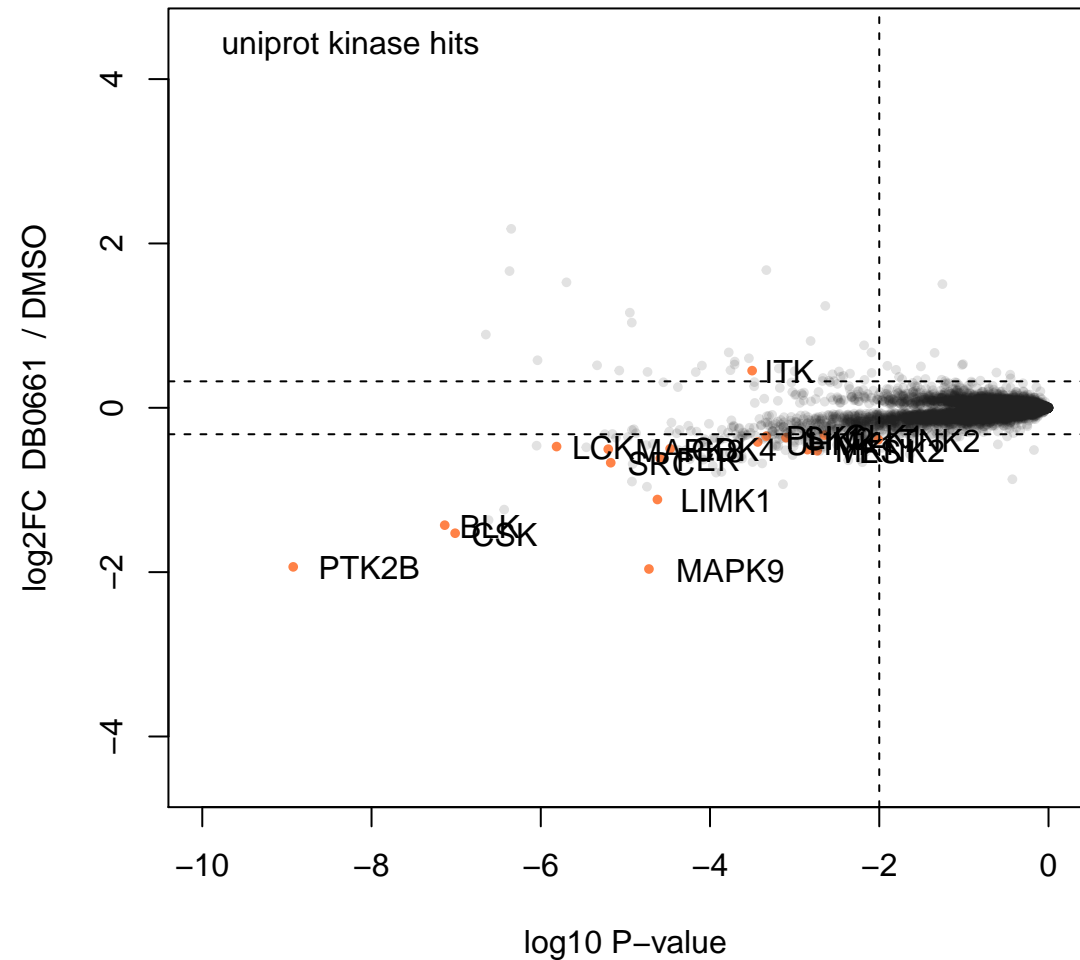



DB0662 (wp168)

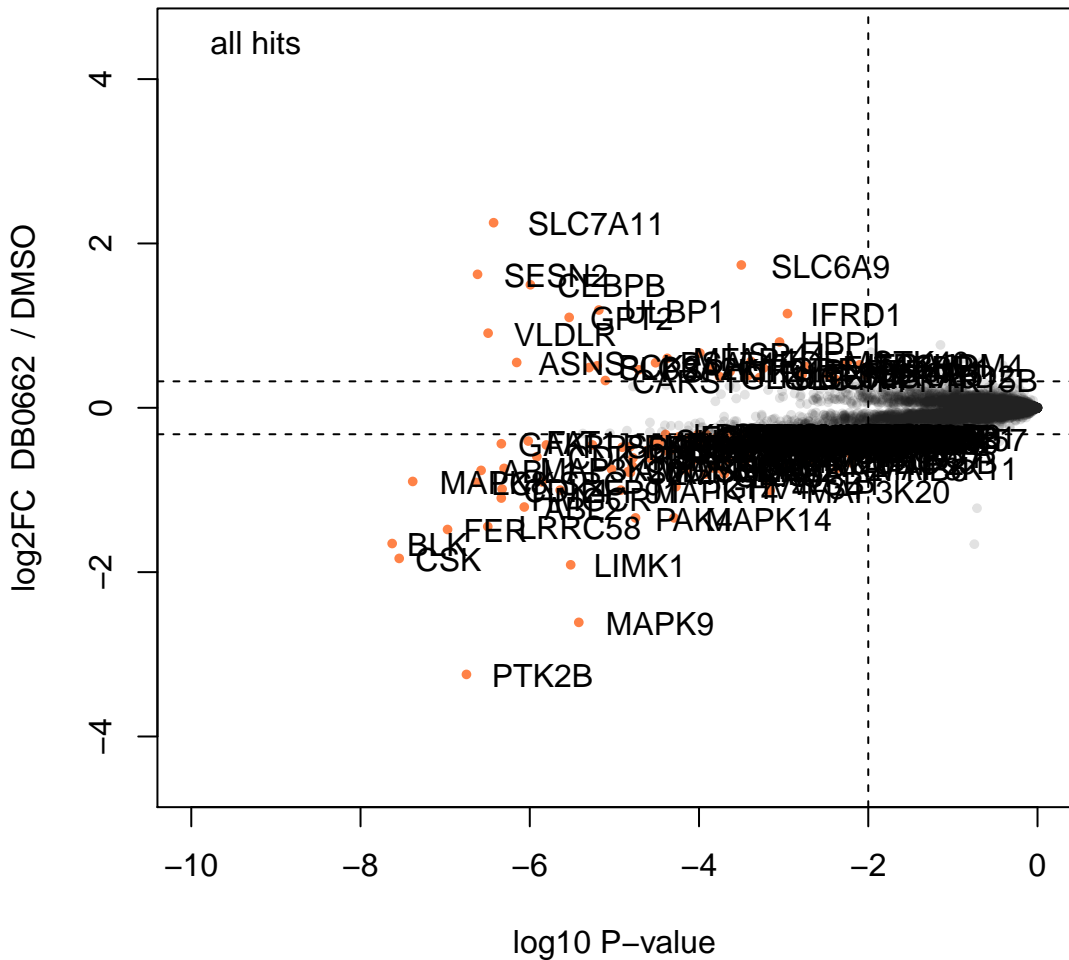

DB0662 (wp168)

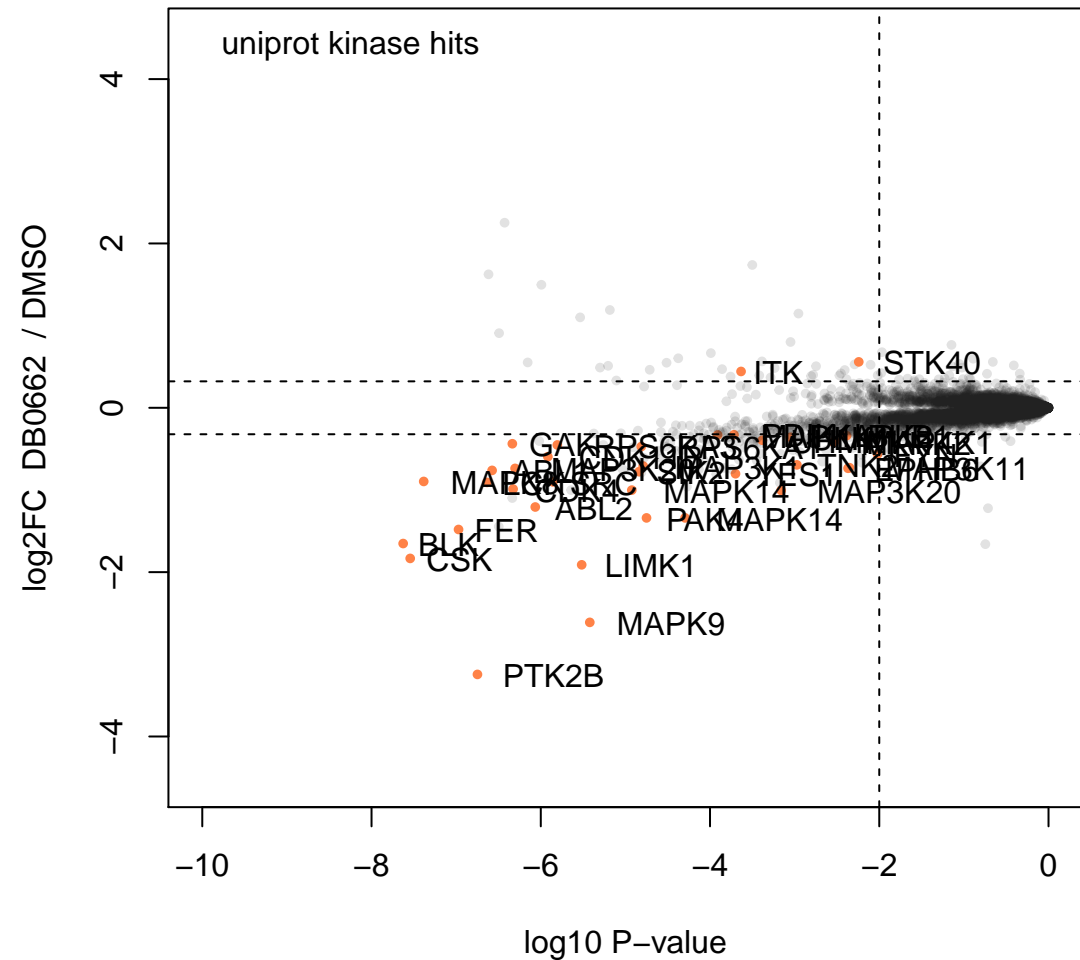

DB1113 (wp168)

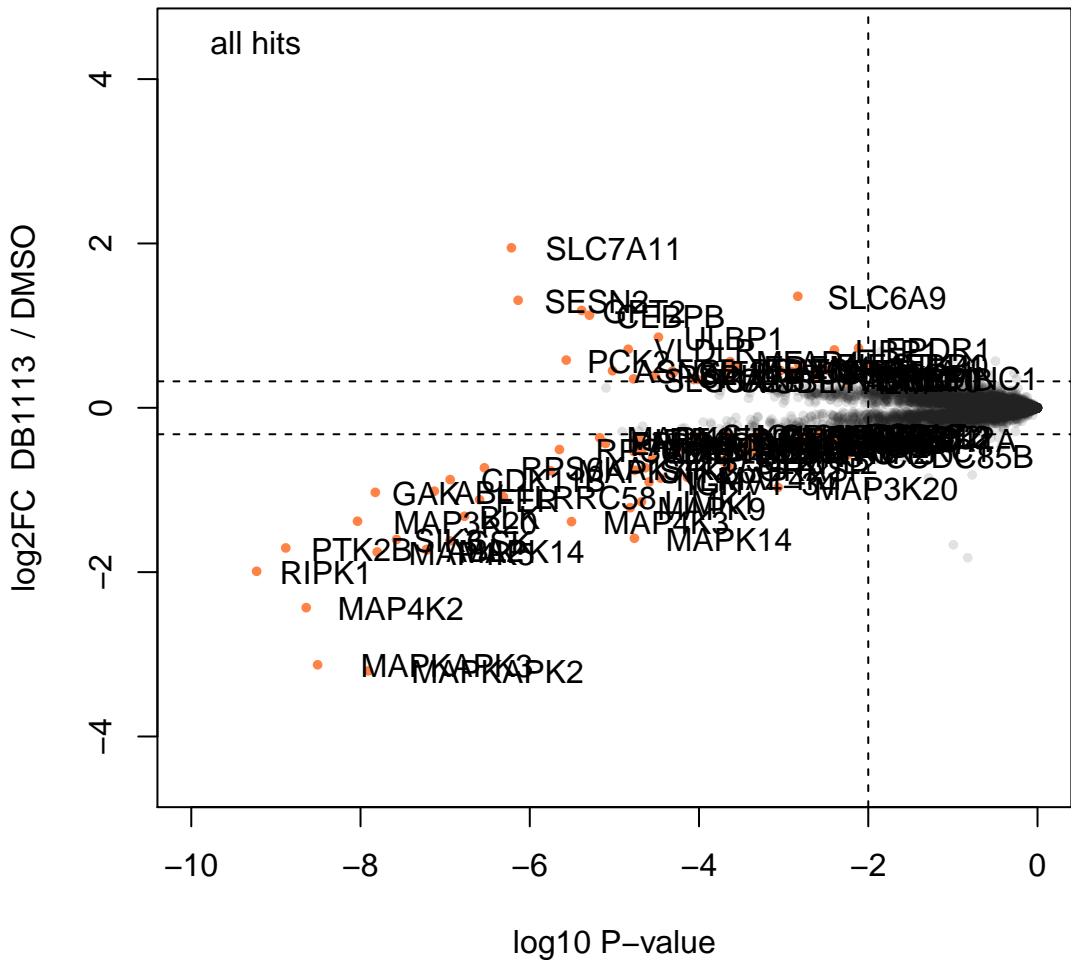

DB1113 (wp168)

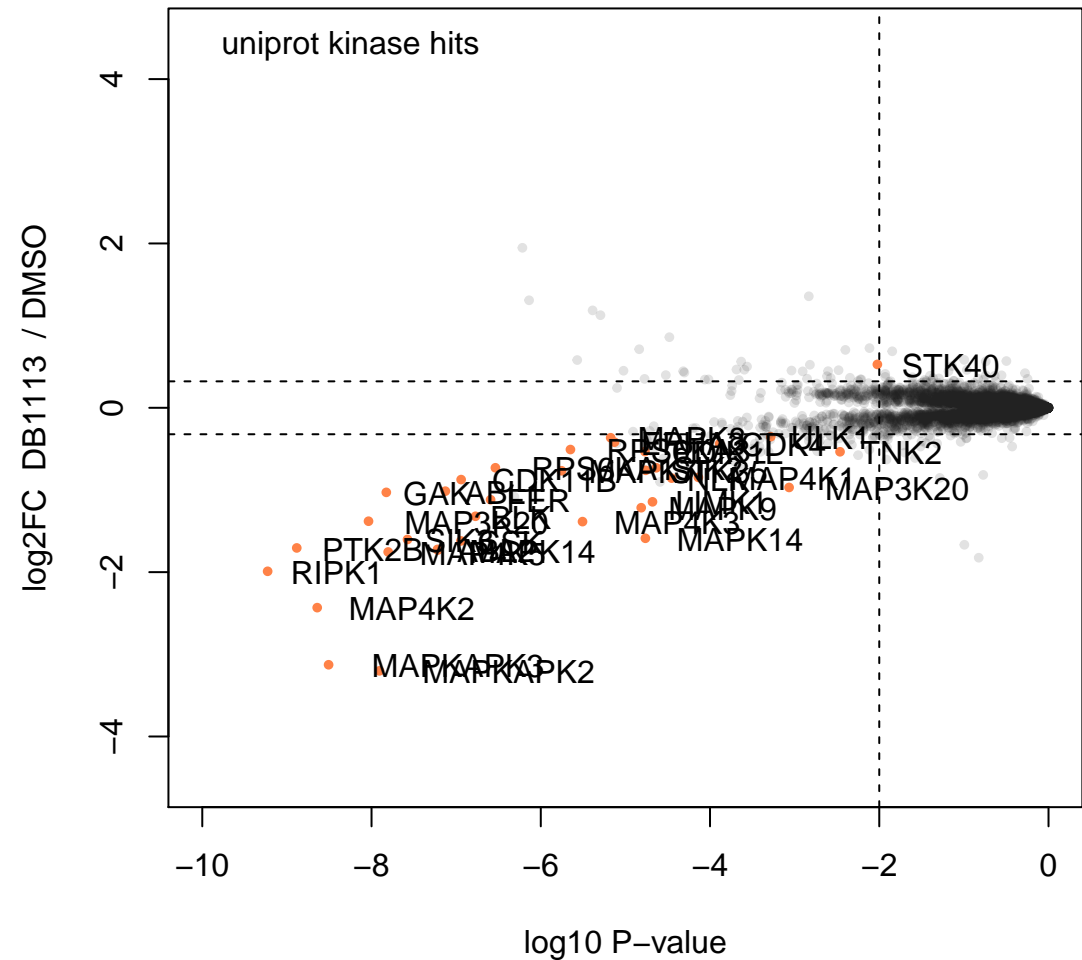

DB0646 (wp172)

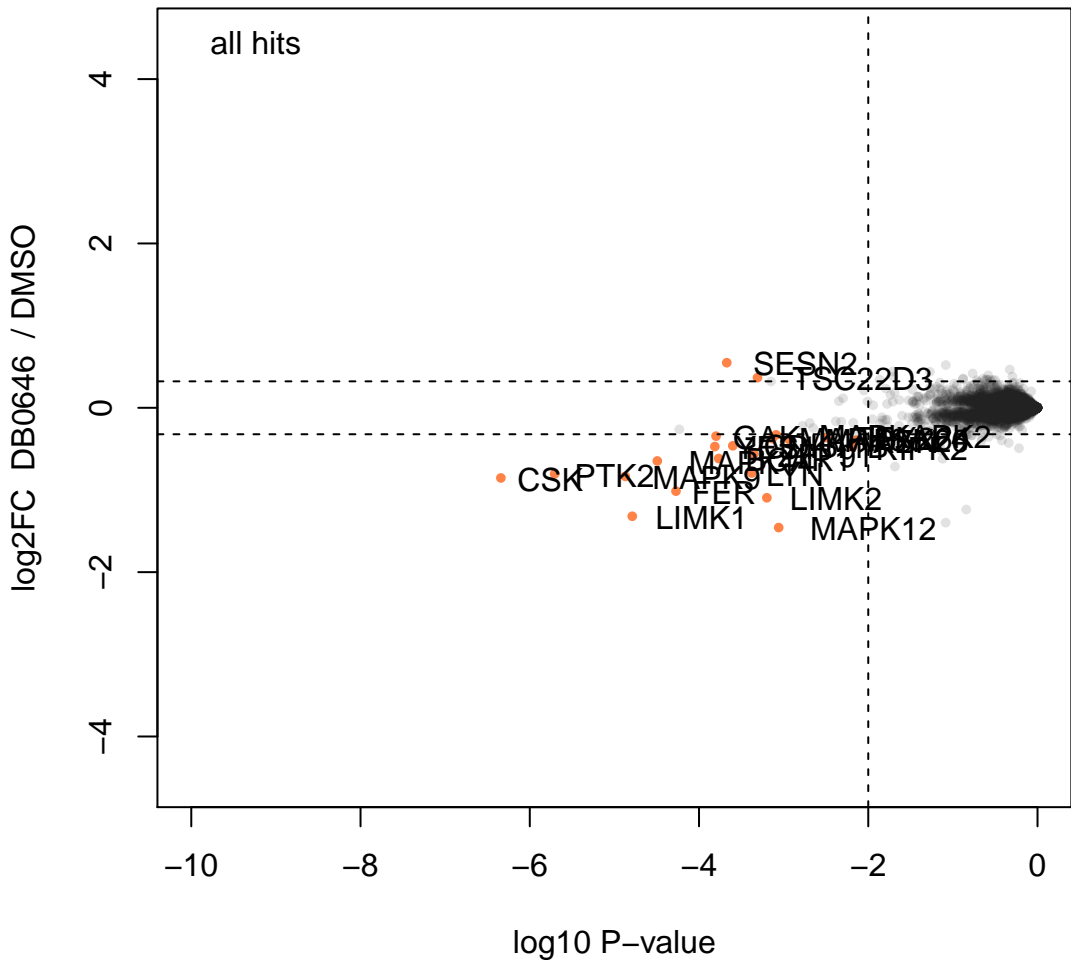

DB0646 (wp172)

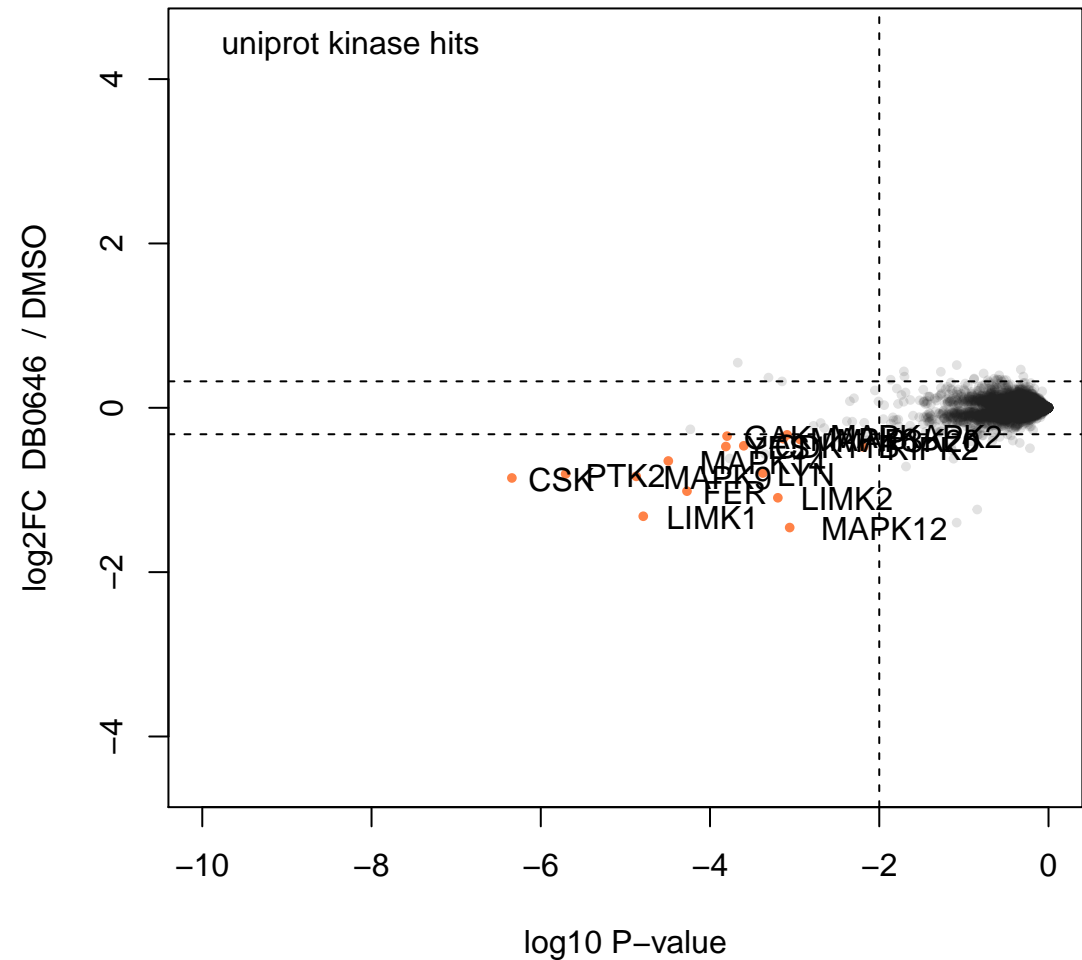

SB1.G.187 (wp172)

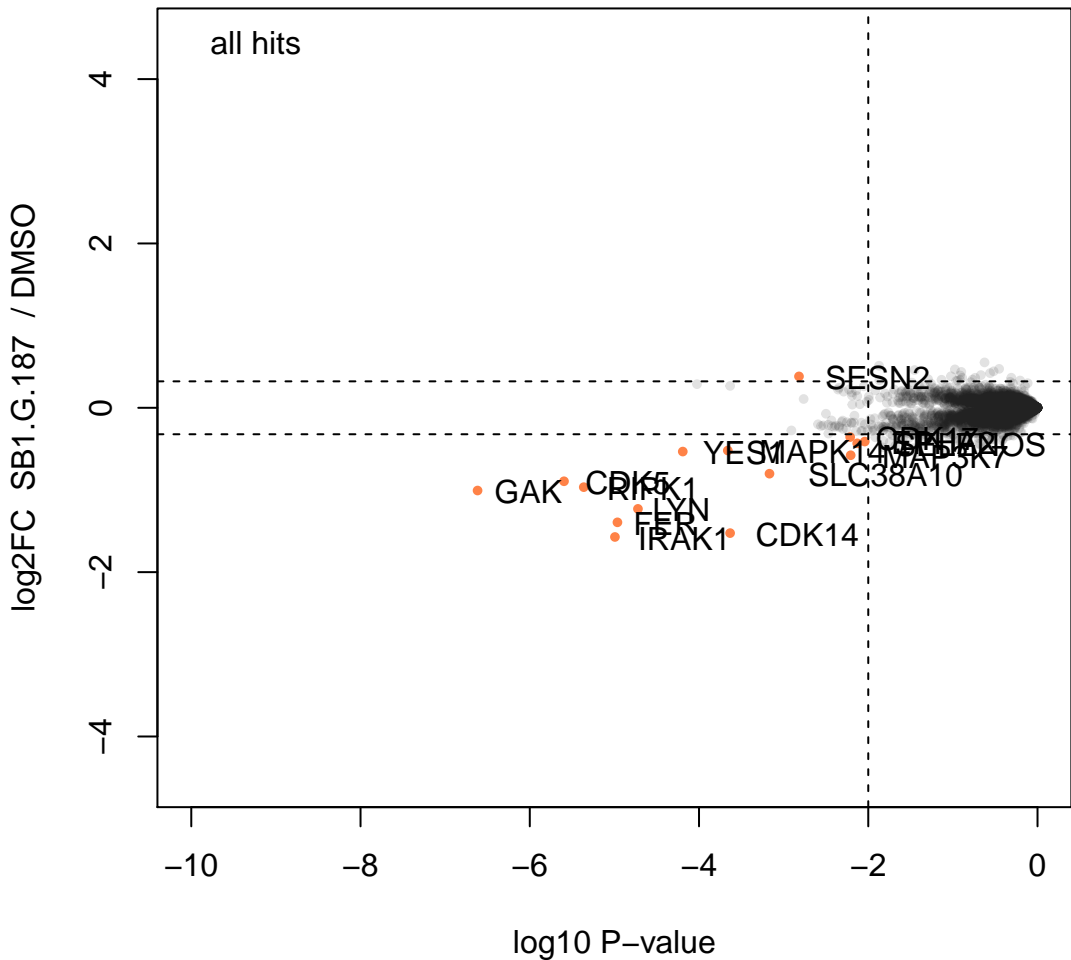

SB1.G.187 (wp172)

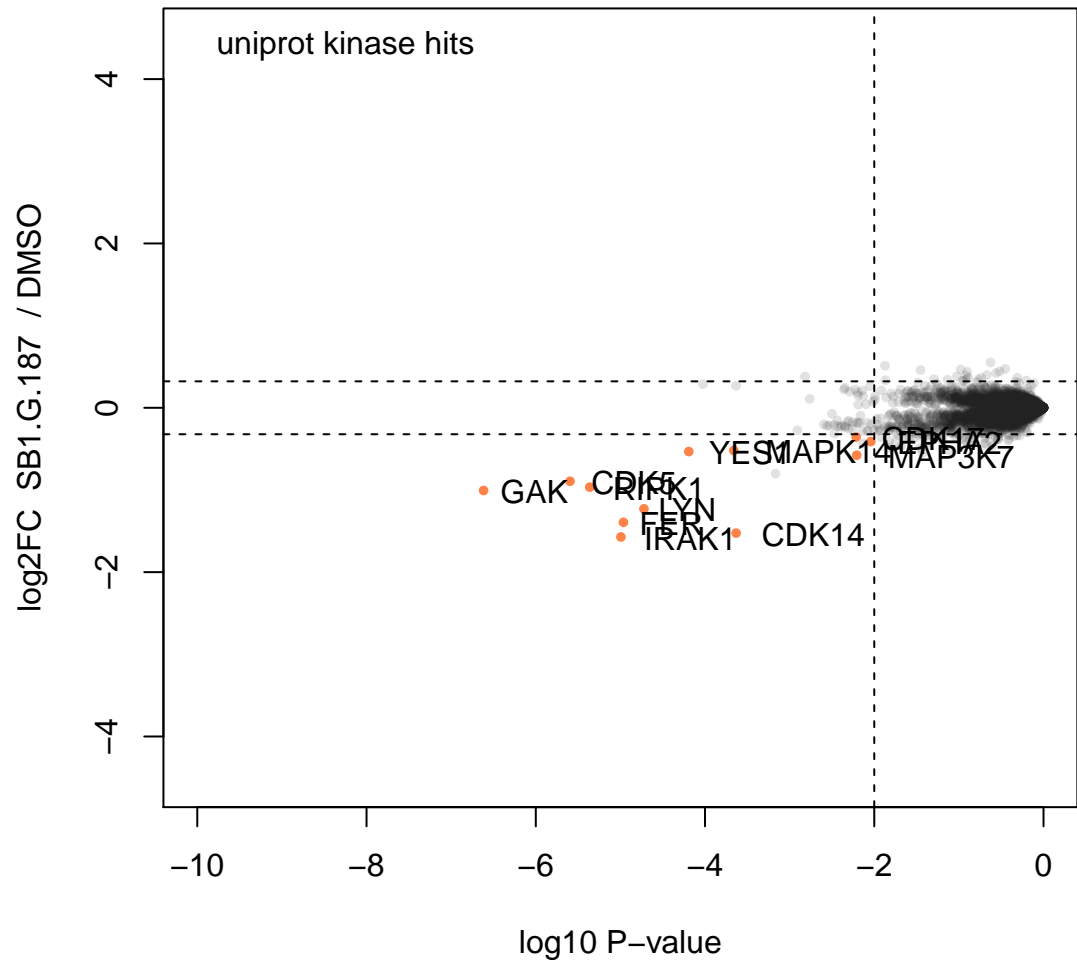



WH.10417.099 (wp172)

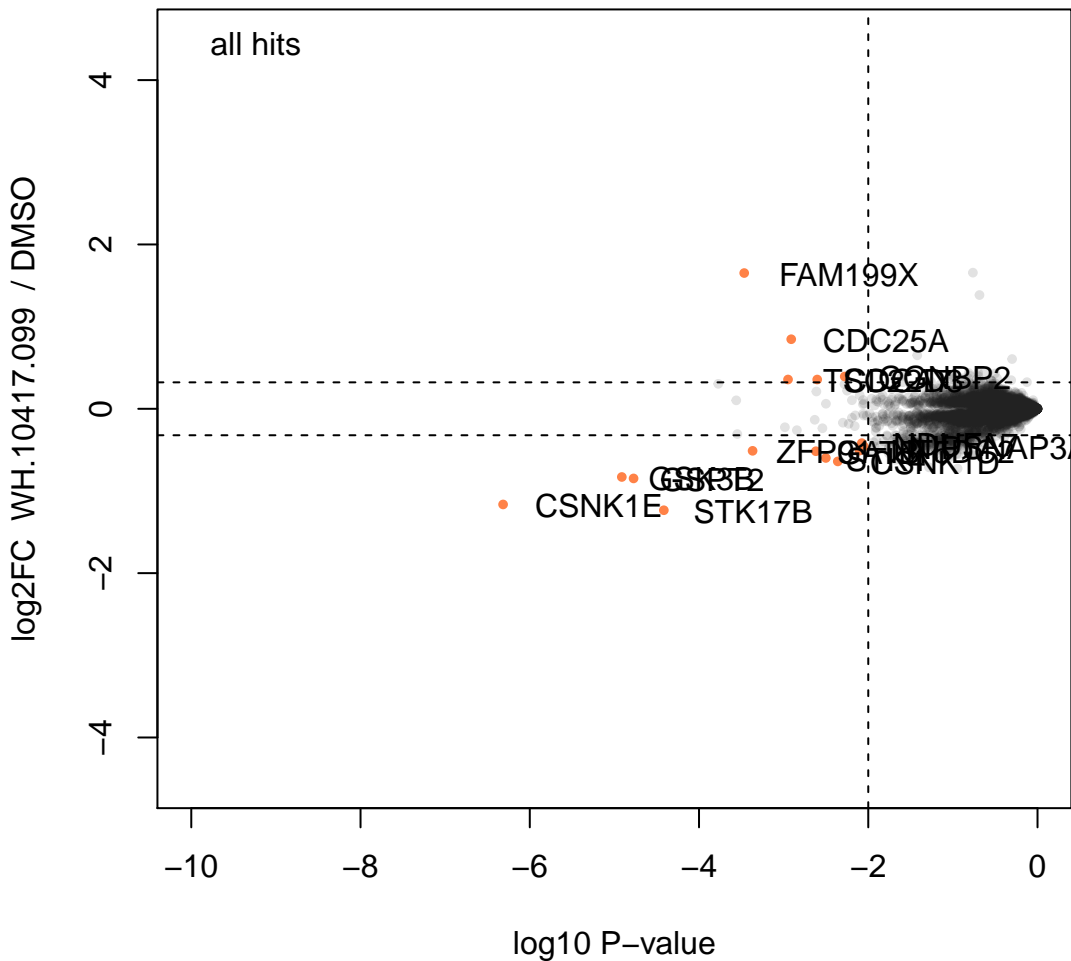

WH.10417.099 (wp172)

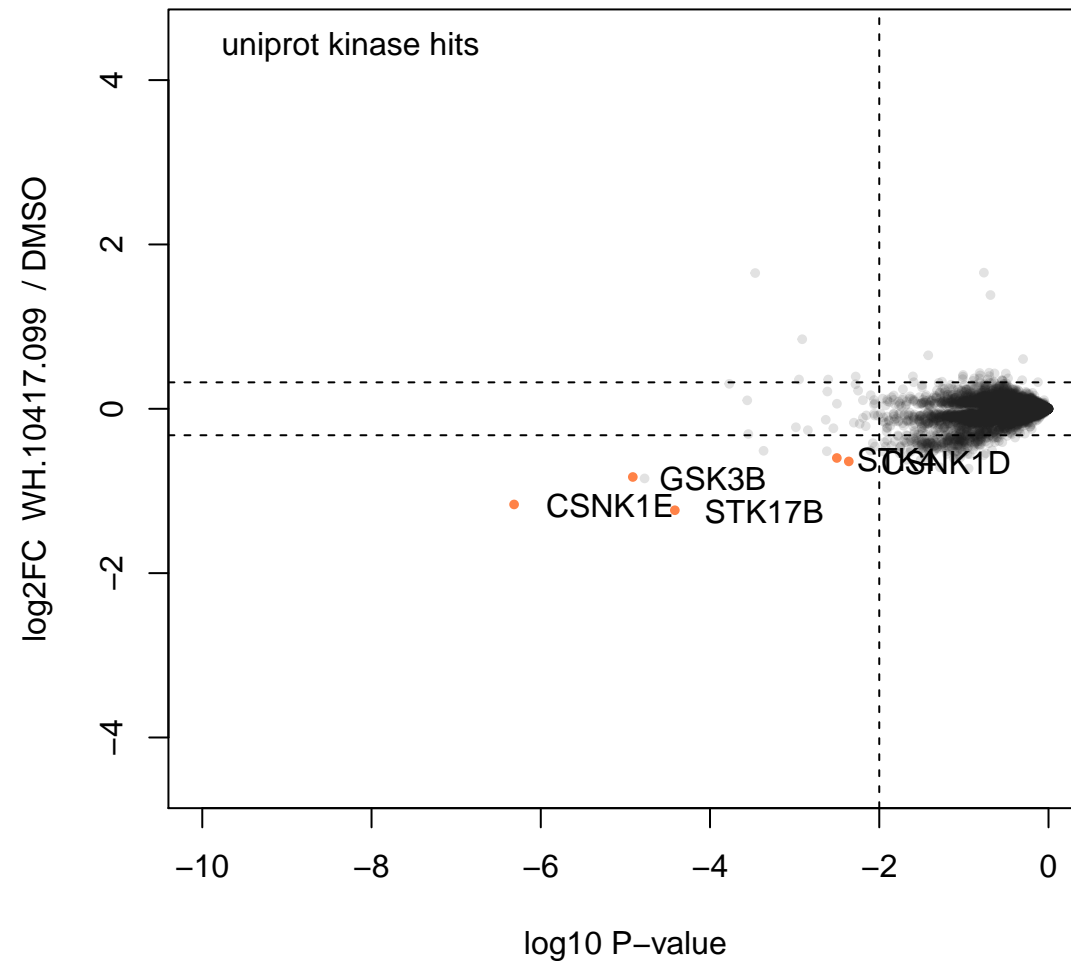

# BJG.04.203 (wp195)

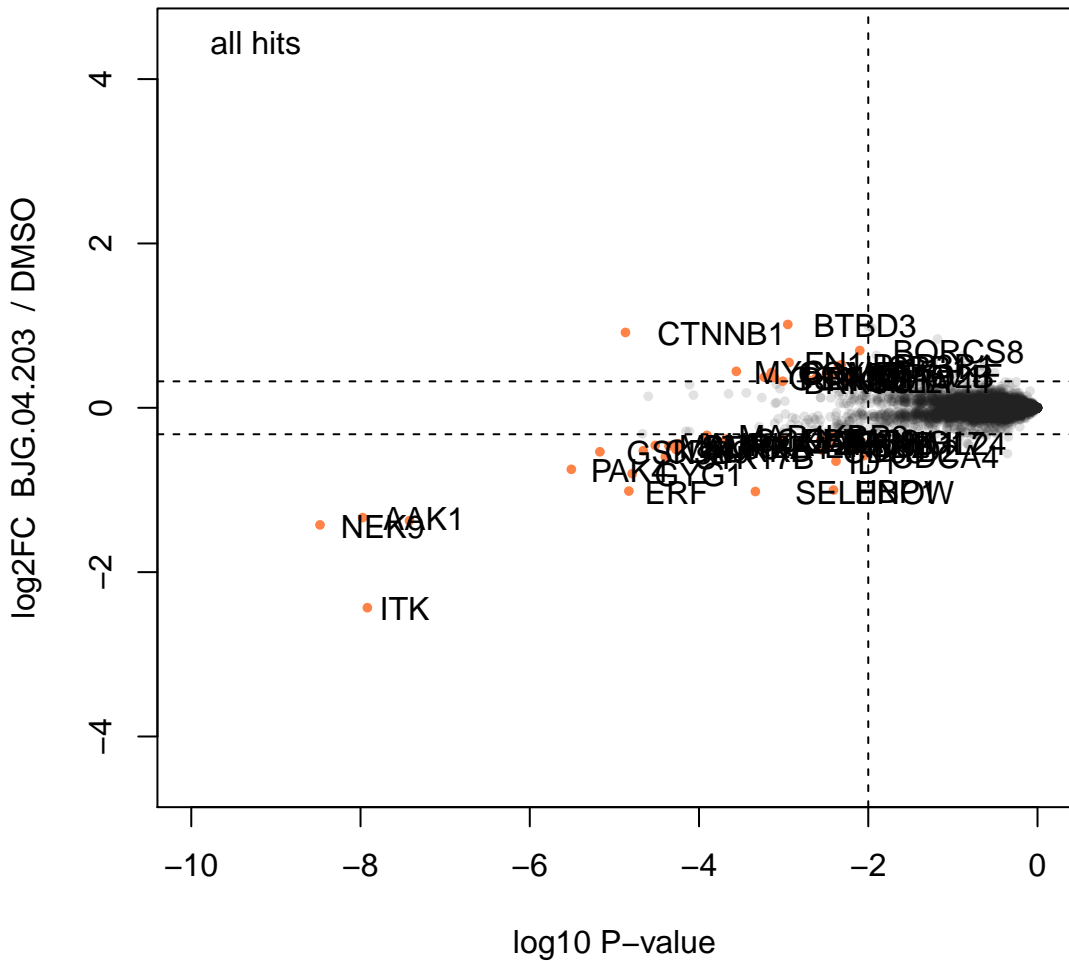

# BJG.04.203 (wp195)

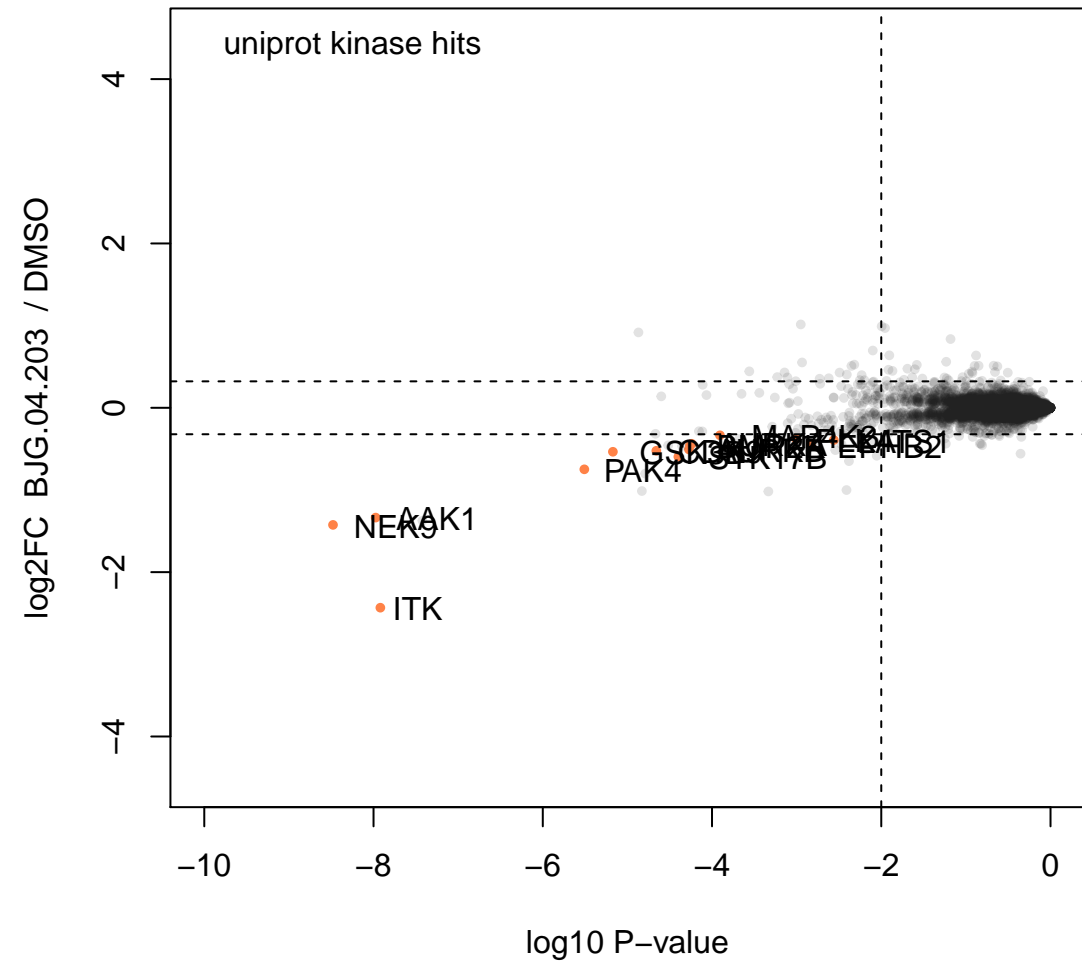

BJG.05.020 (wp195)

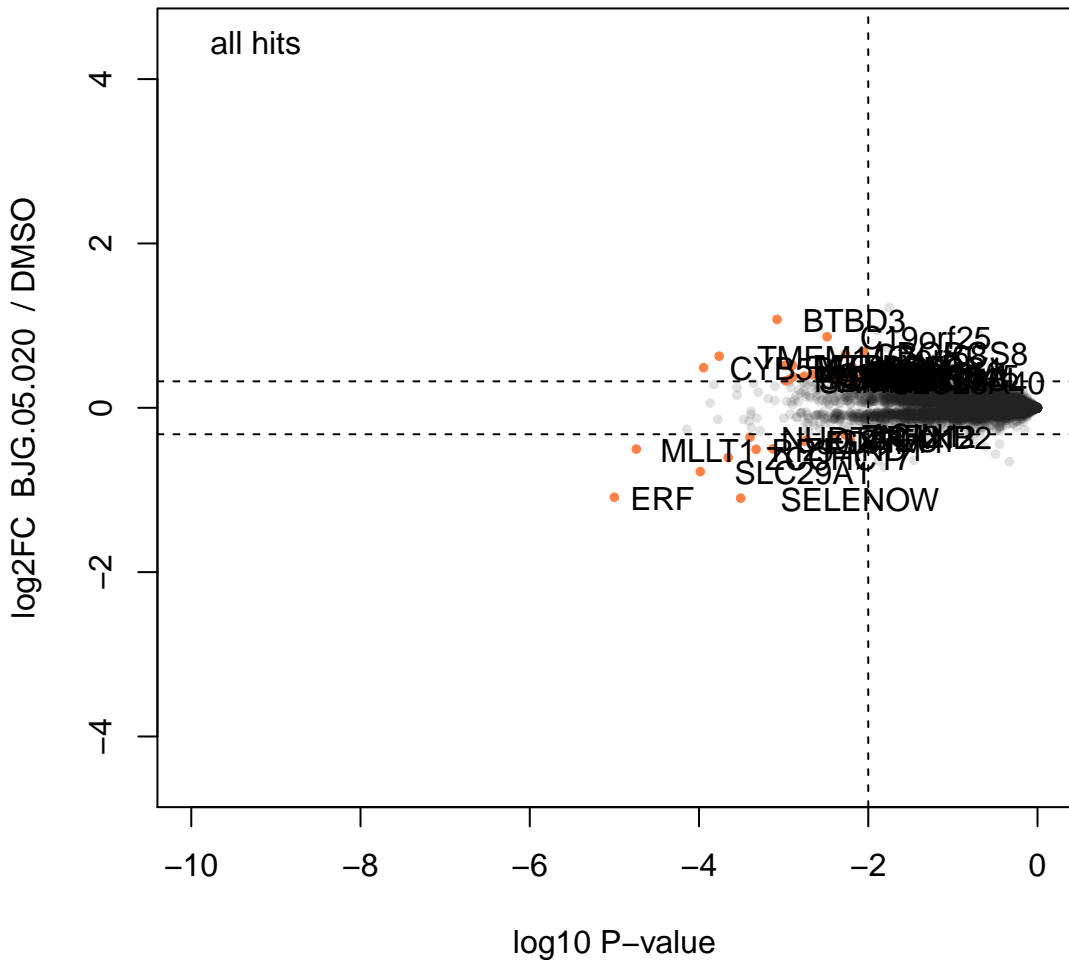

BJG.05.020 (wp195)

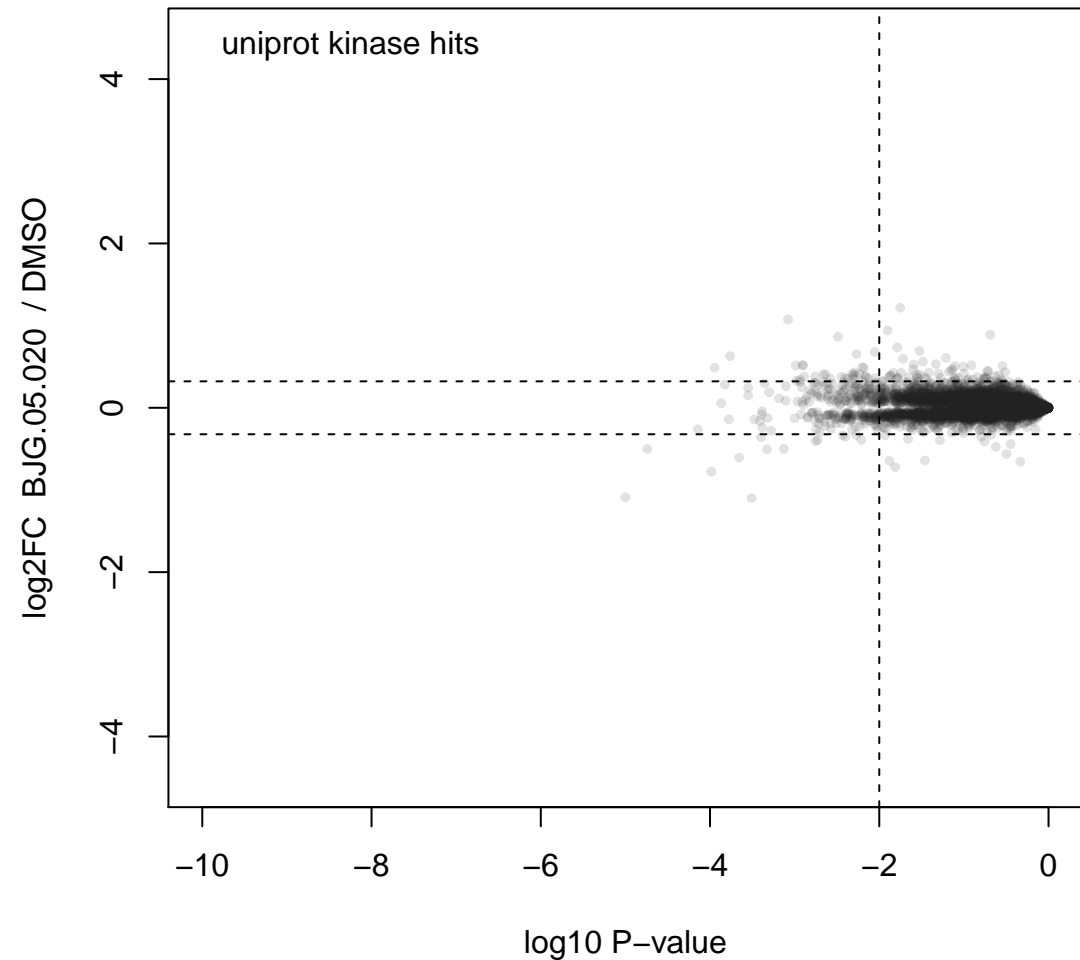





dKIT.2 (wp195)

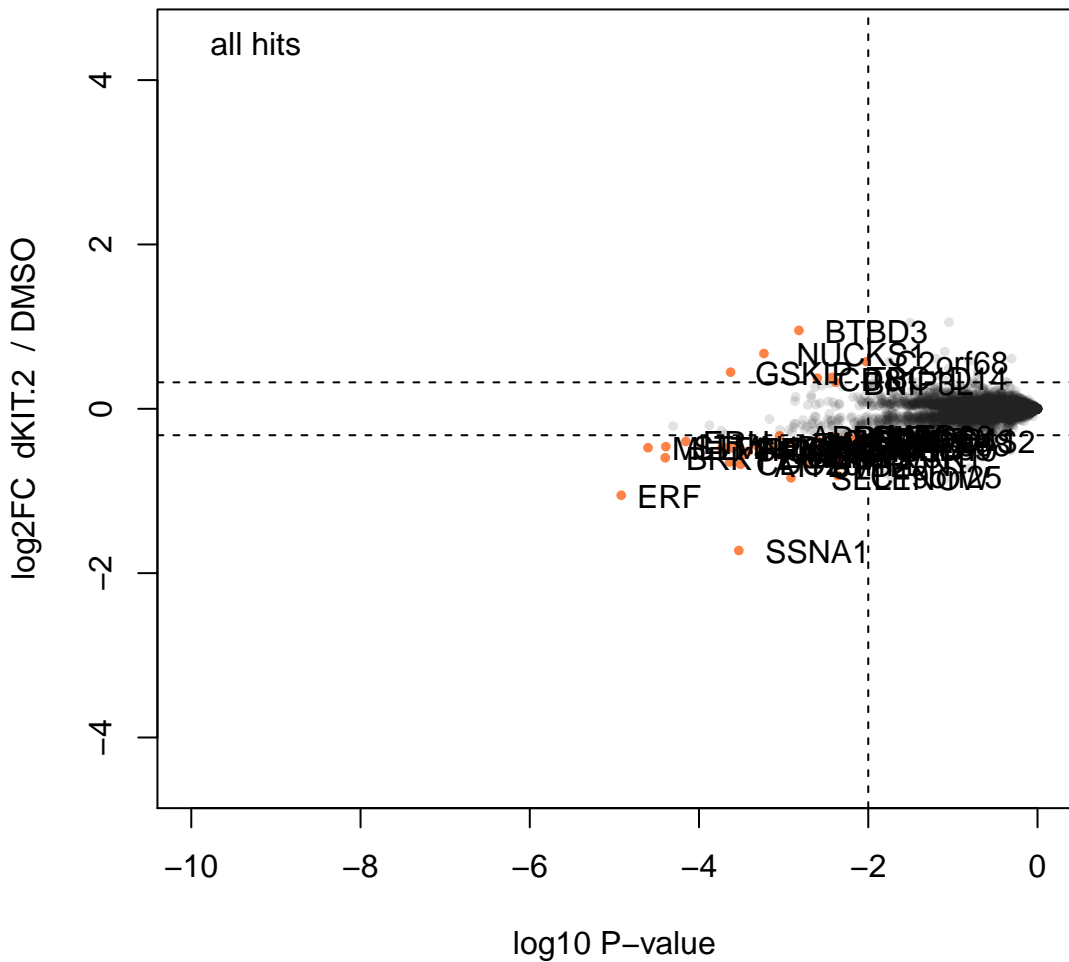

dKIT.2 (wp195)

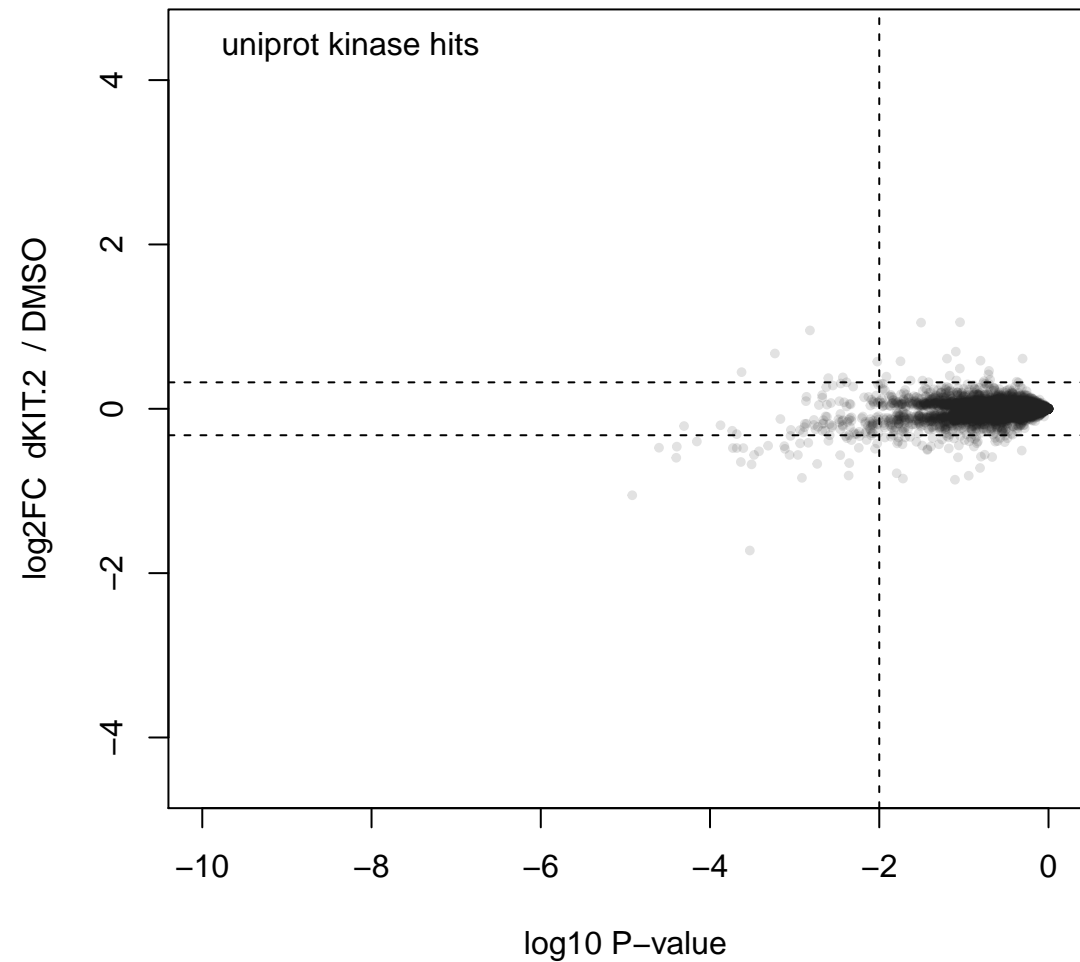

INY.02.083.01 (wp195)

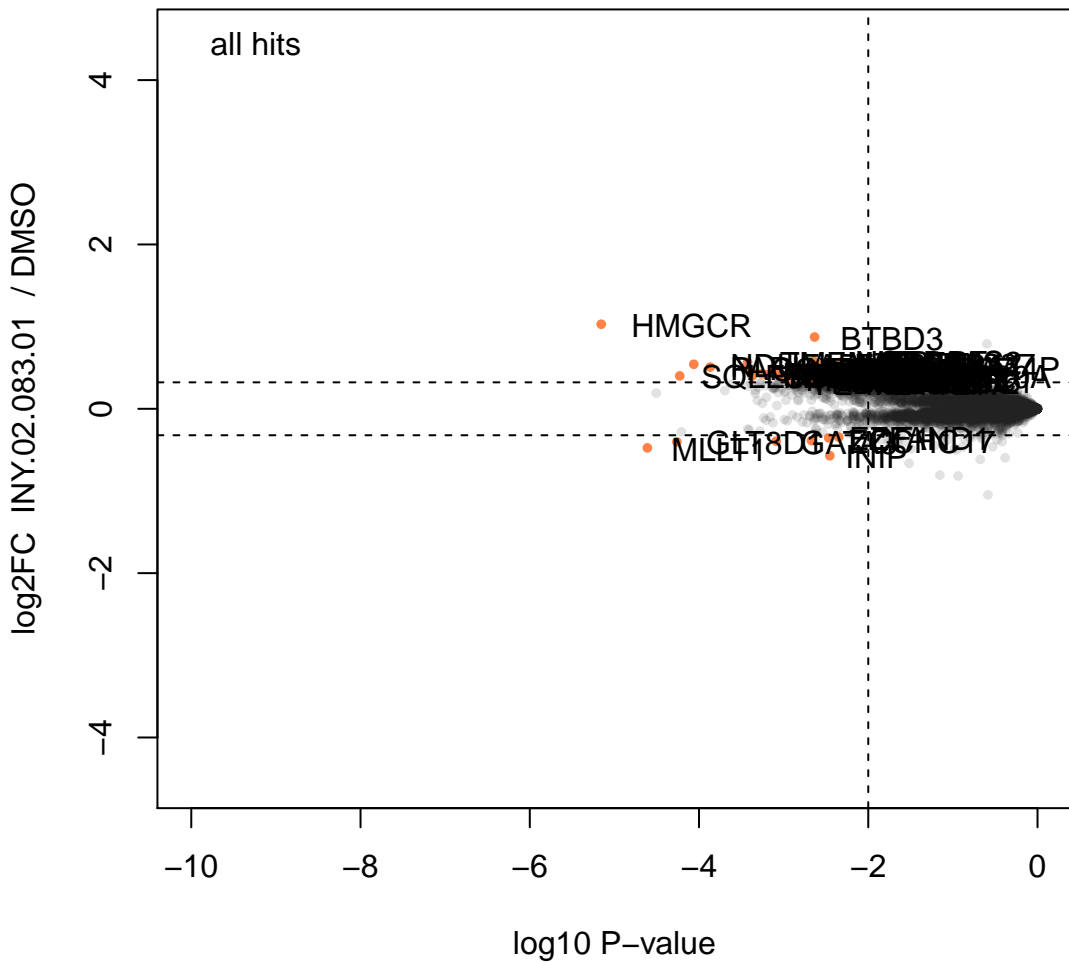

INY.02.083.01 (wp195)

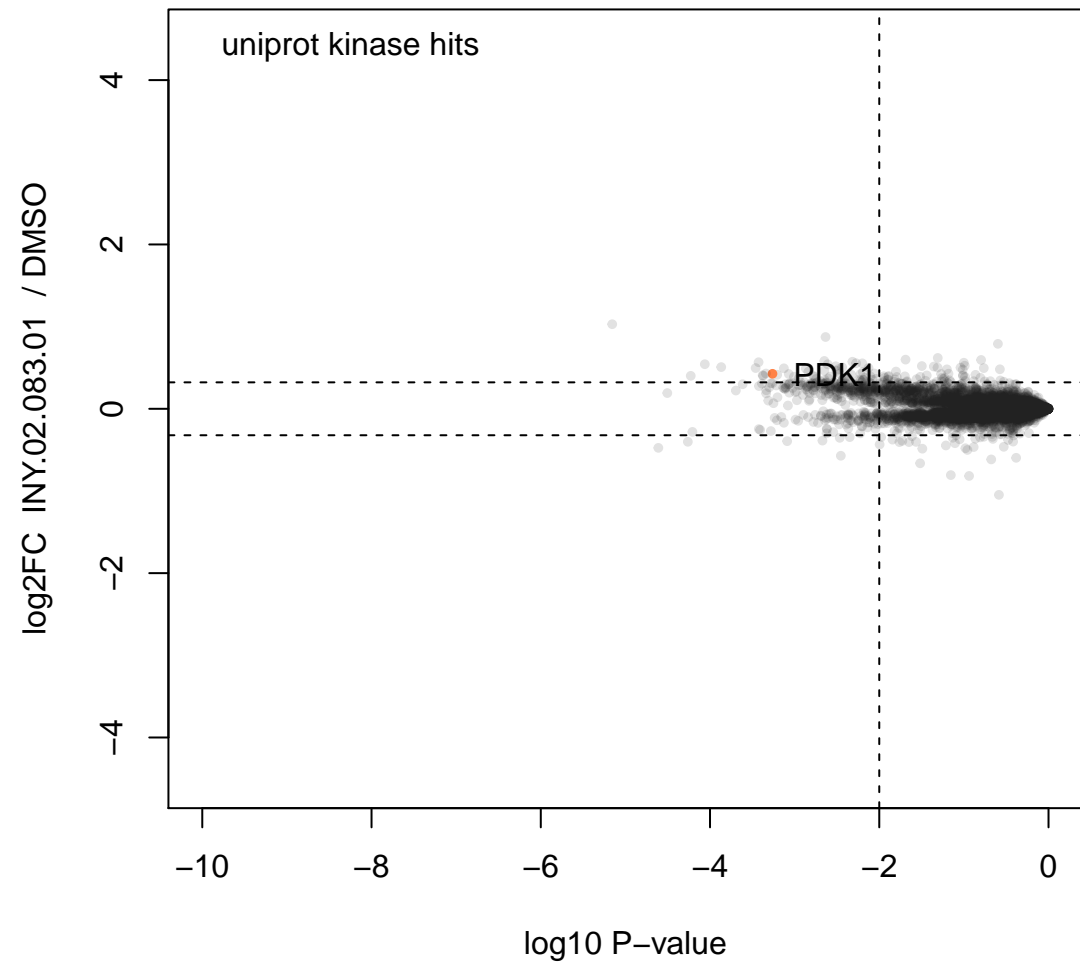

INY.02.180.01 (wp195)

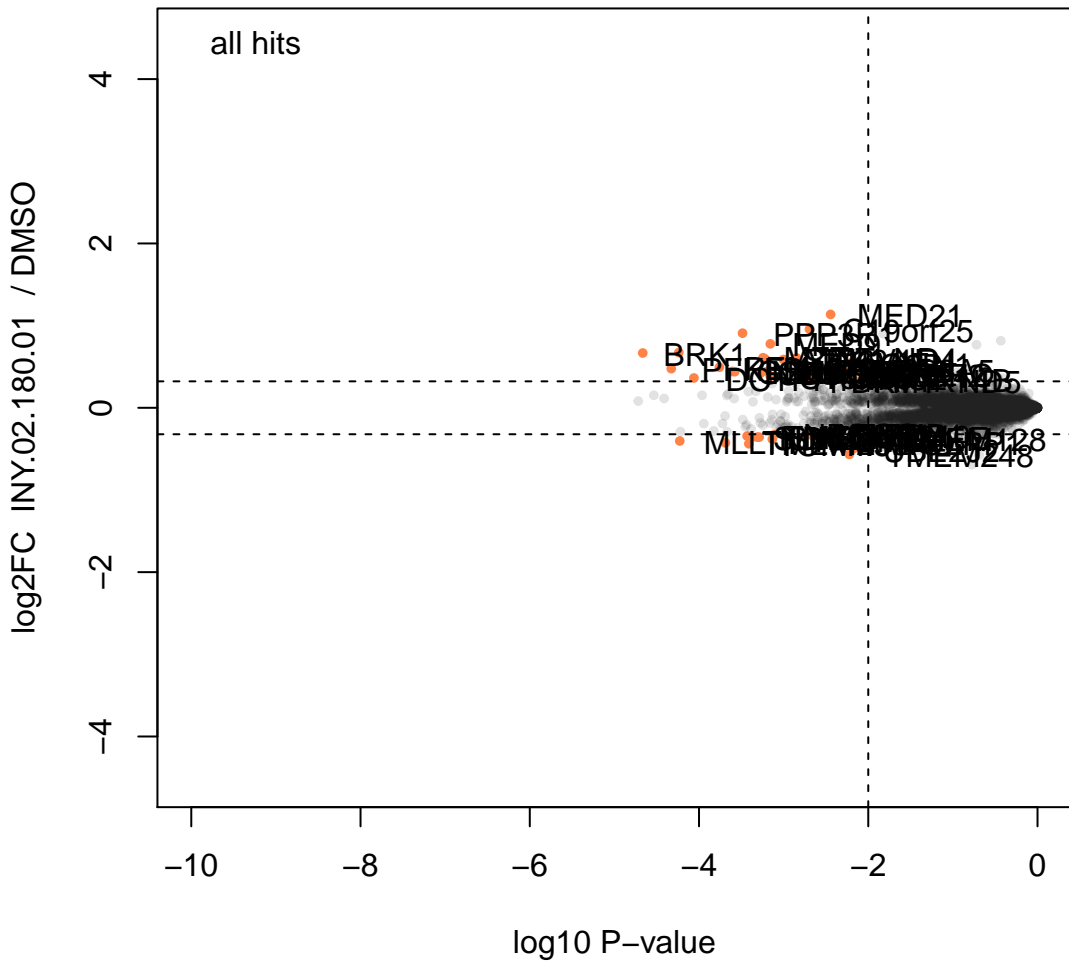

INY.02.180.01 (wp195)

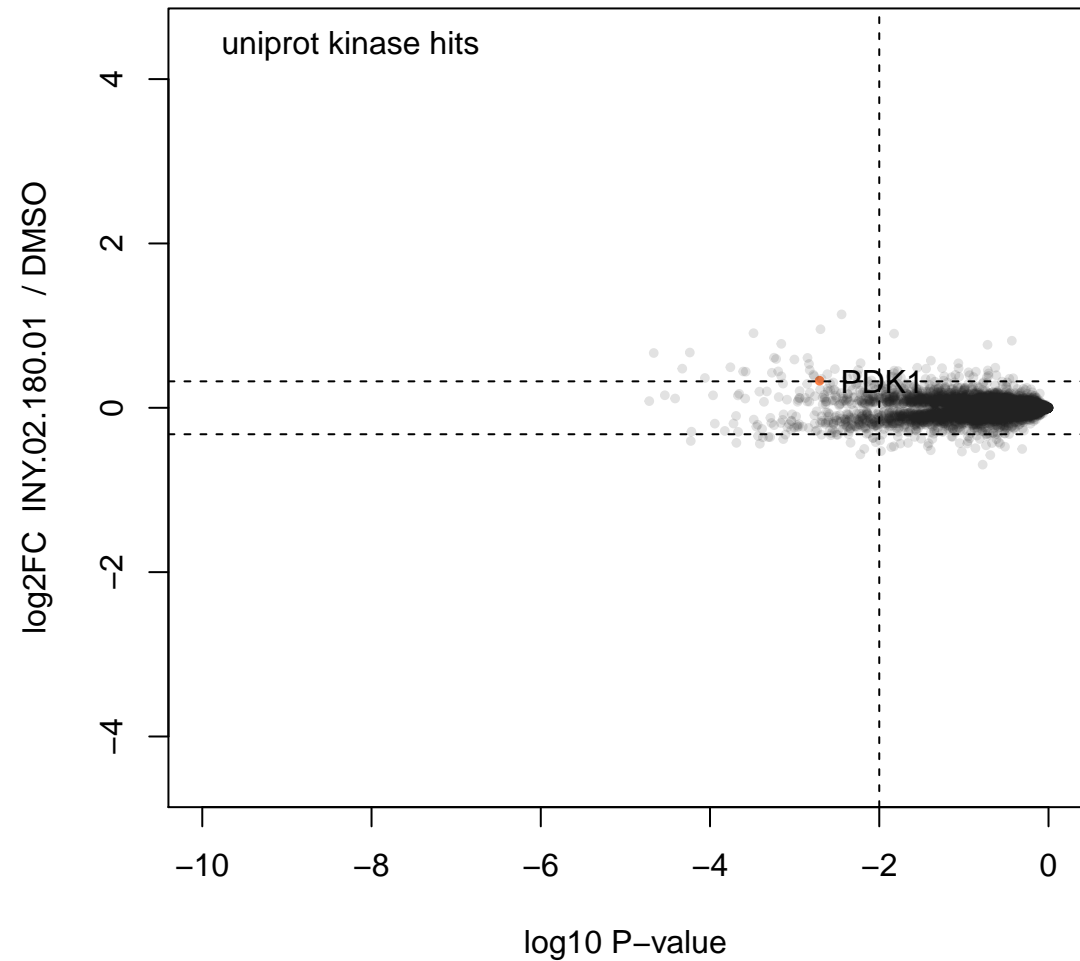

INY.04.026.01 (wp195)

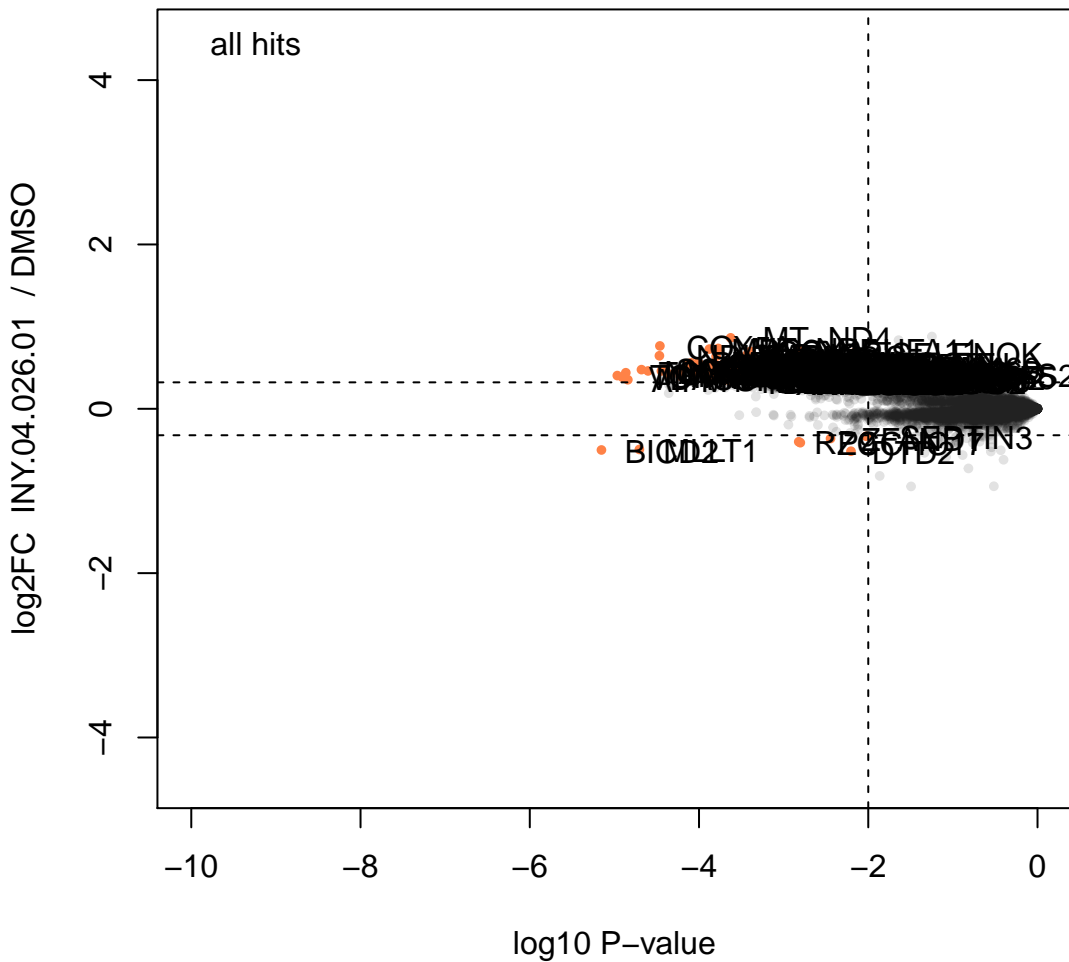

INY.04.026.01 (wp195)

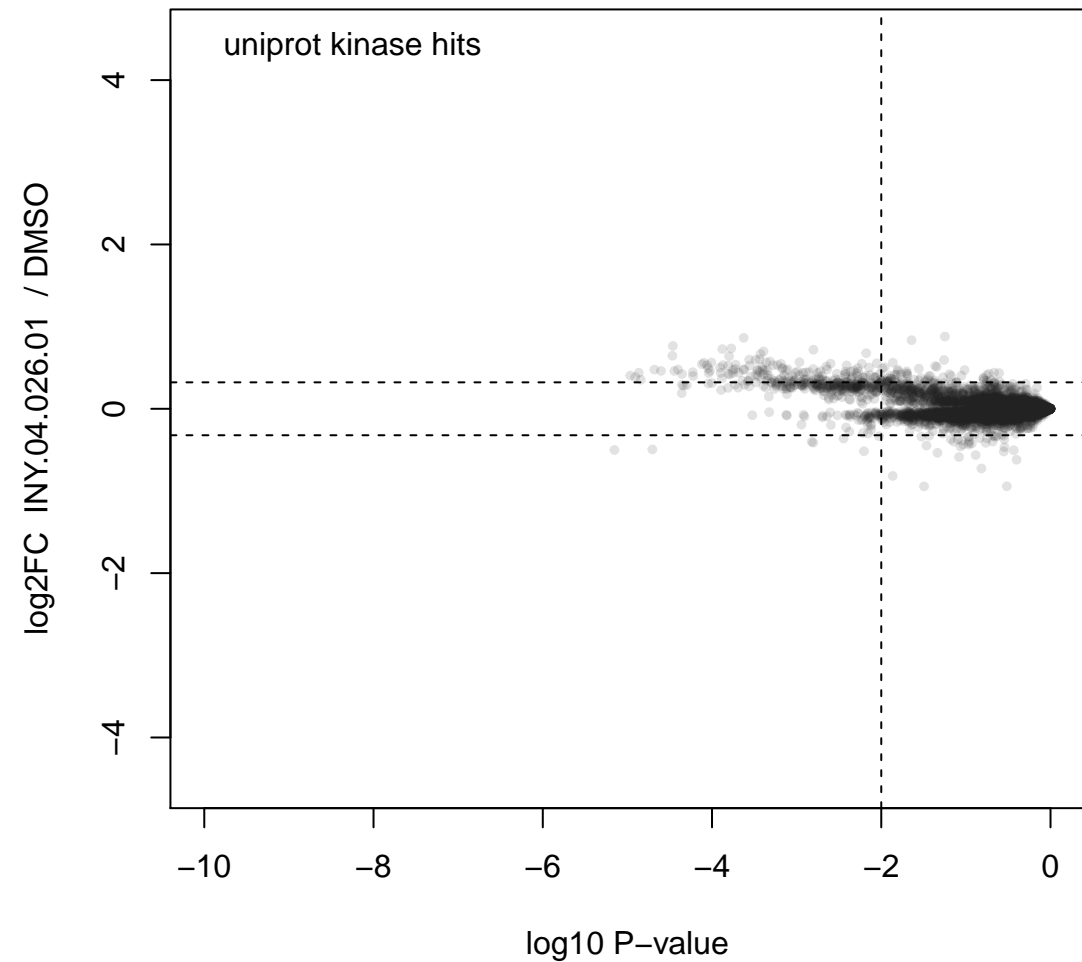

INY.04.125.01 (wp195)

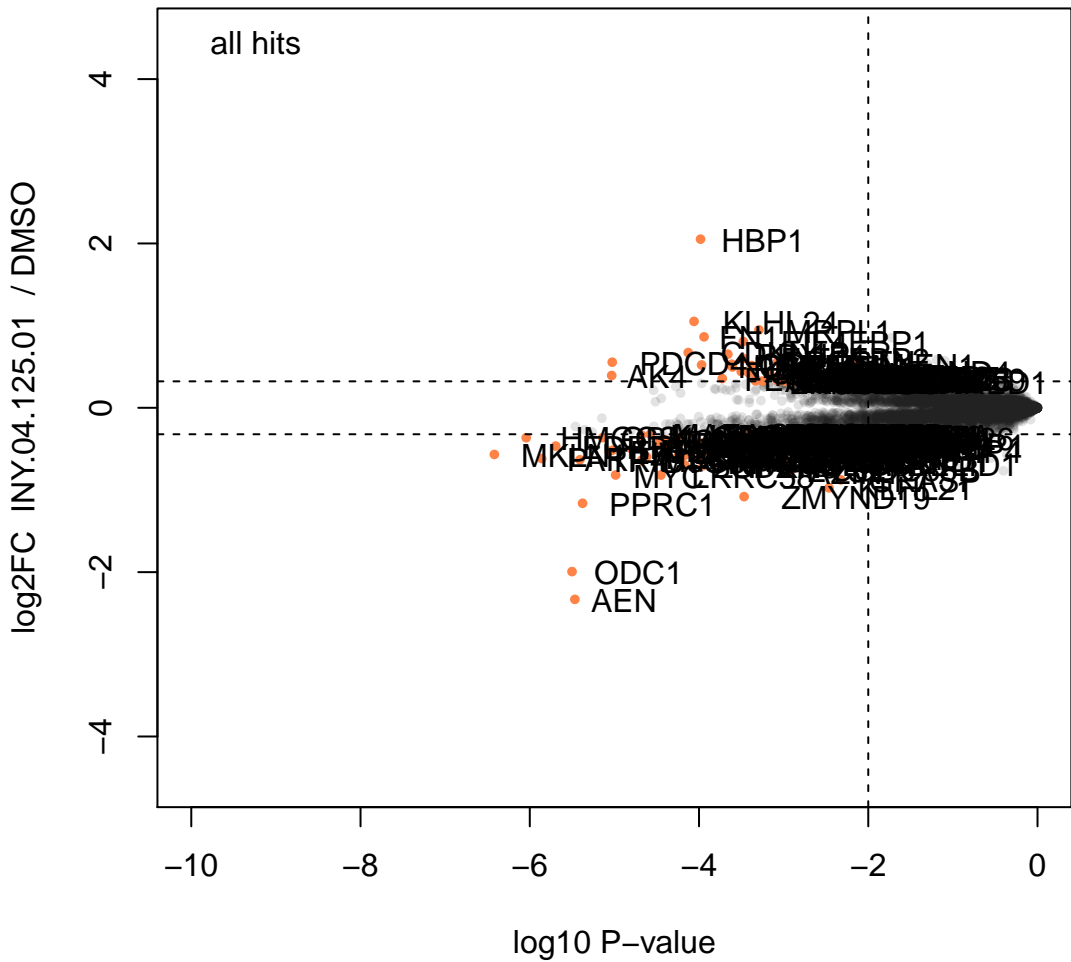

INY.04.125.01 (wp195)

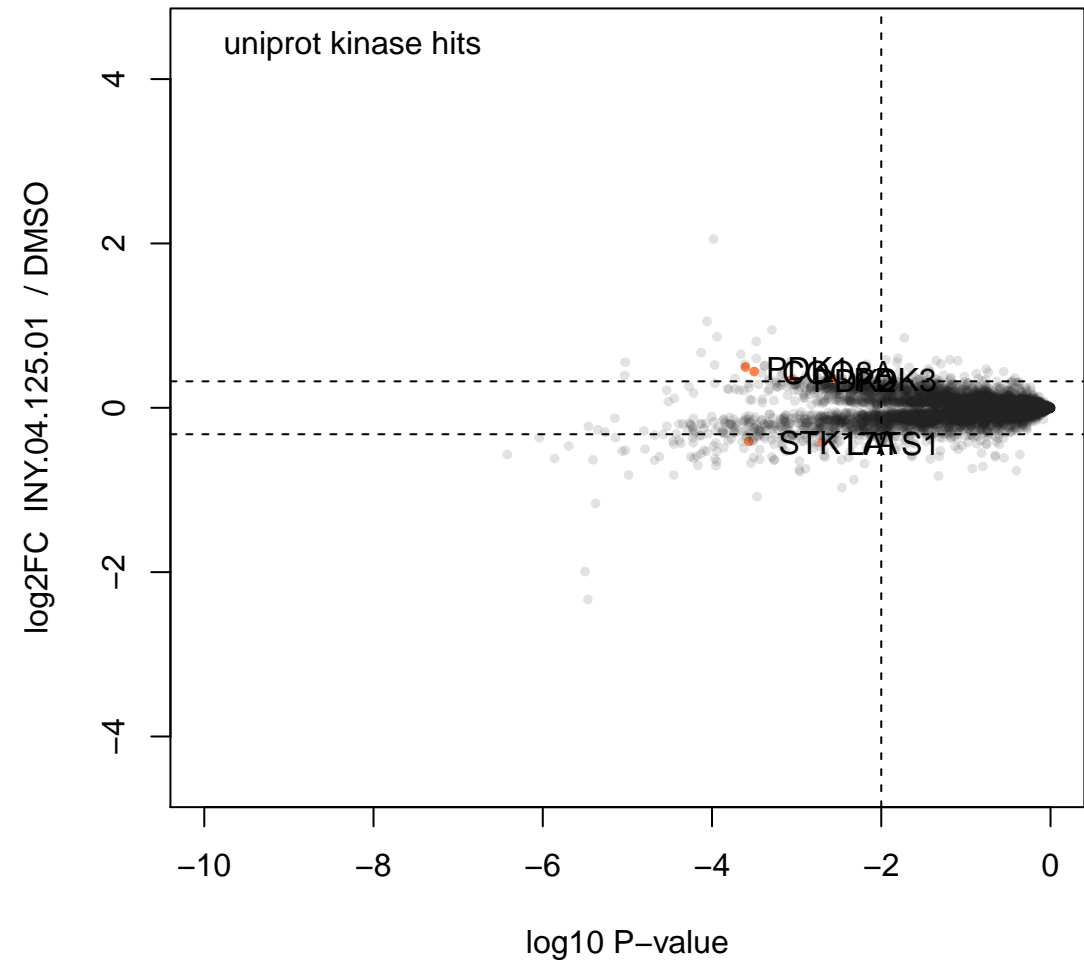

JWG.123 (wp195)

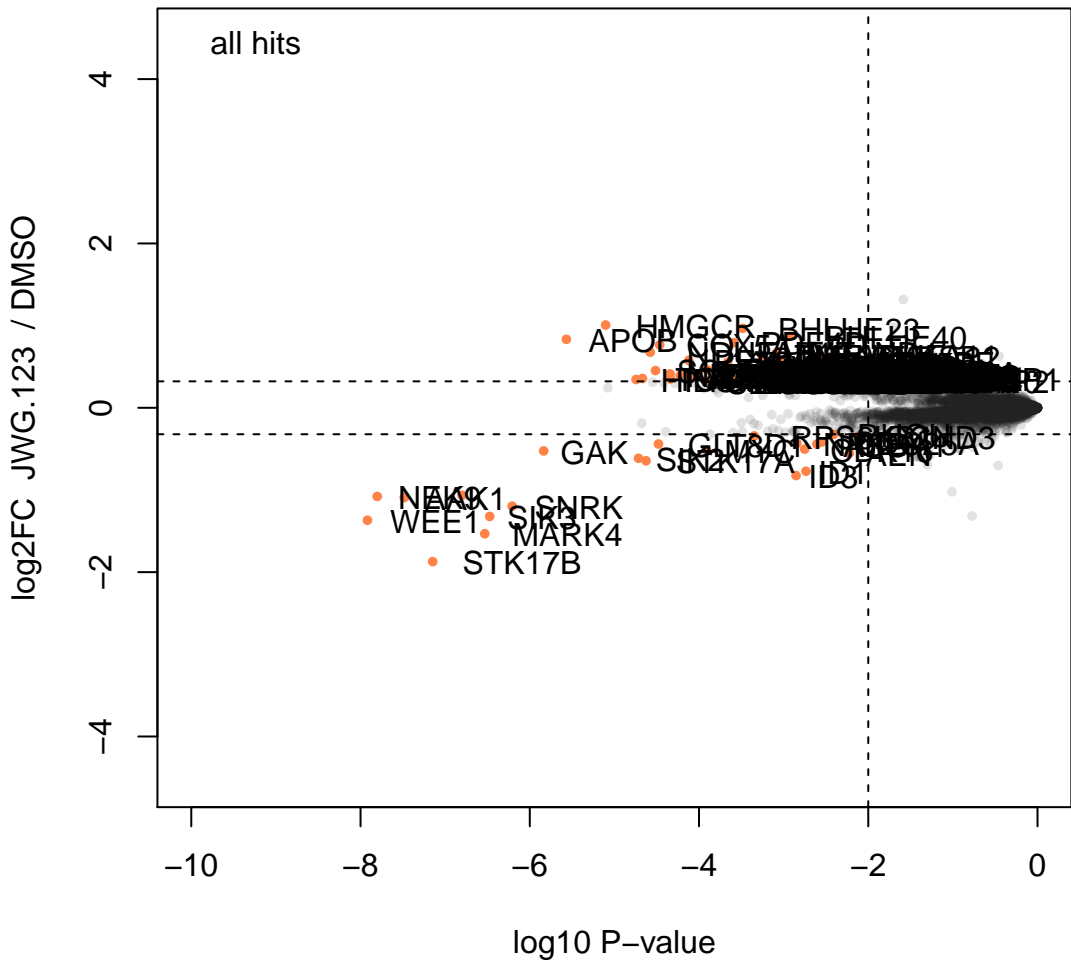

JWG.123 (wp195)

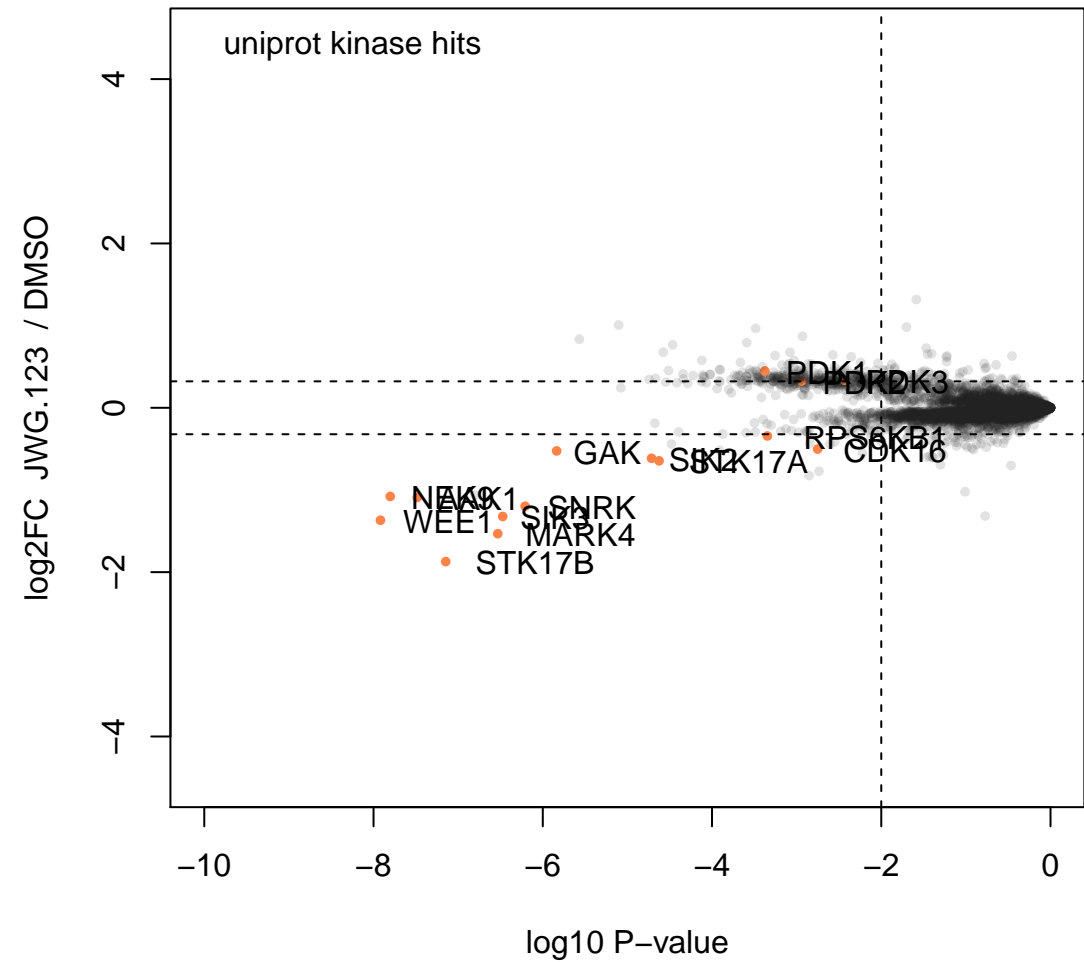

### JWG.137 (wp195)

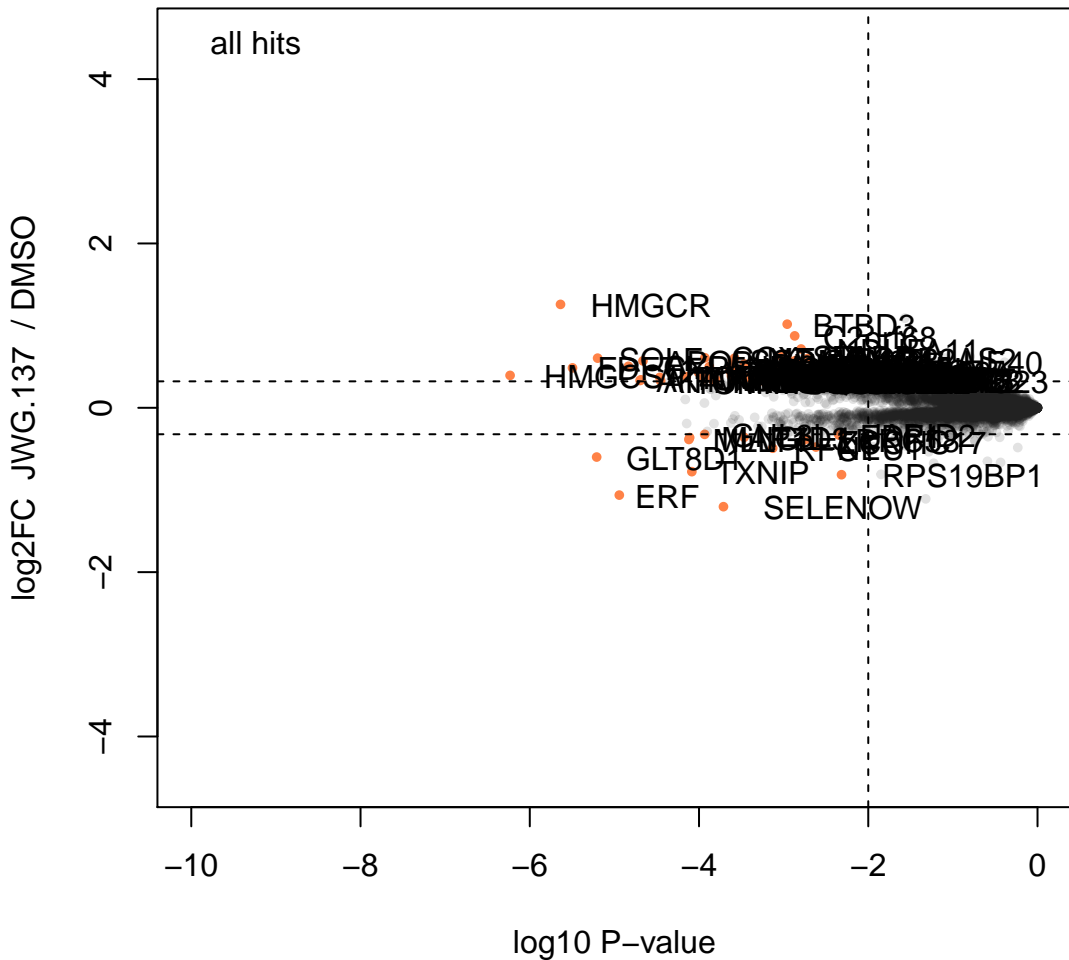

### JWG.137 (wp195)

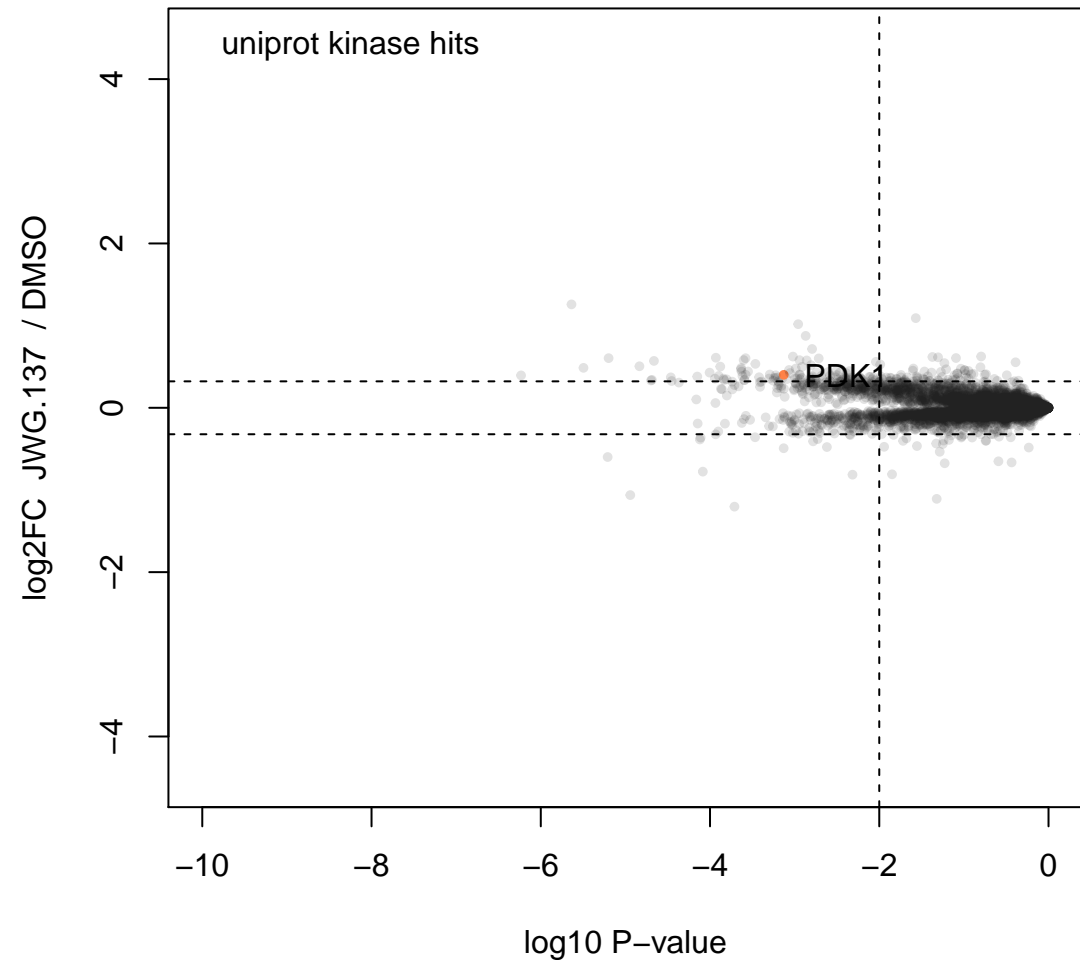



JWG.148 (wp195)

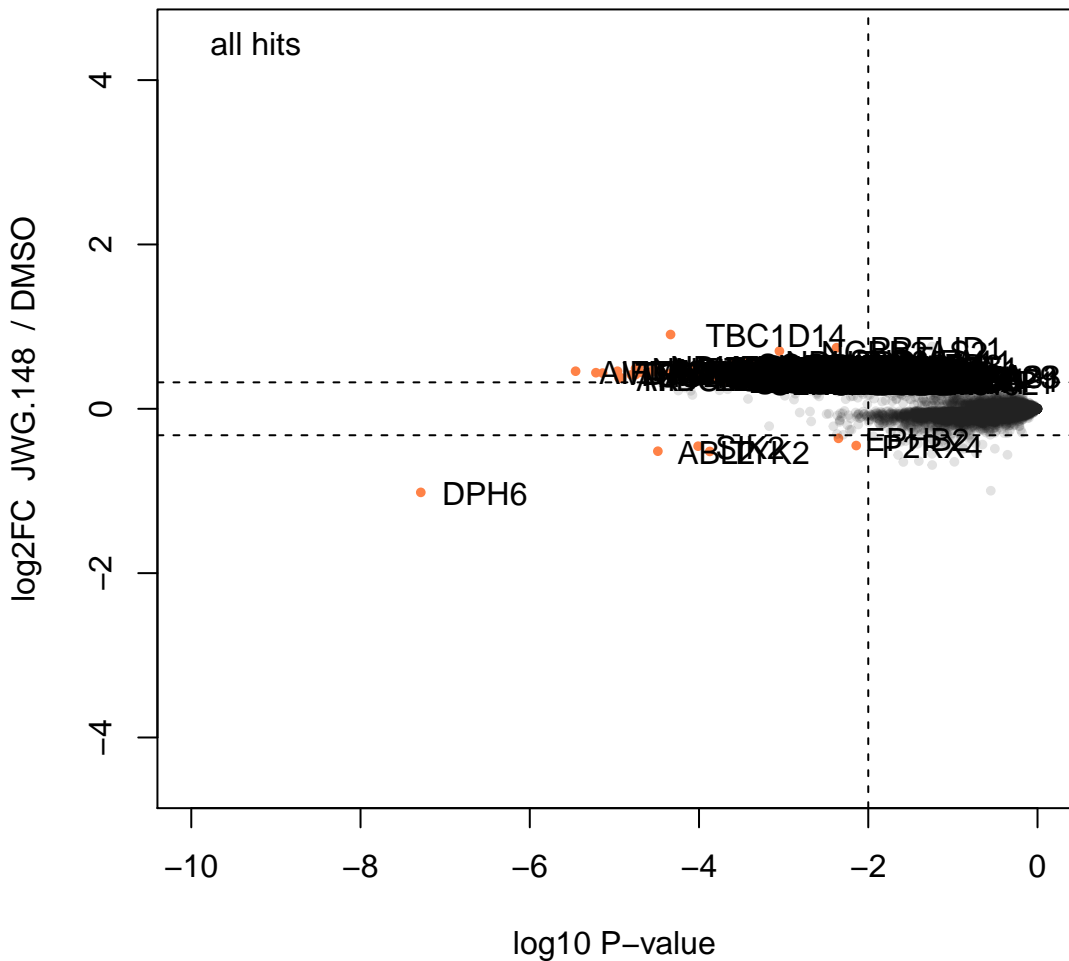

JWG.148 (wp195)

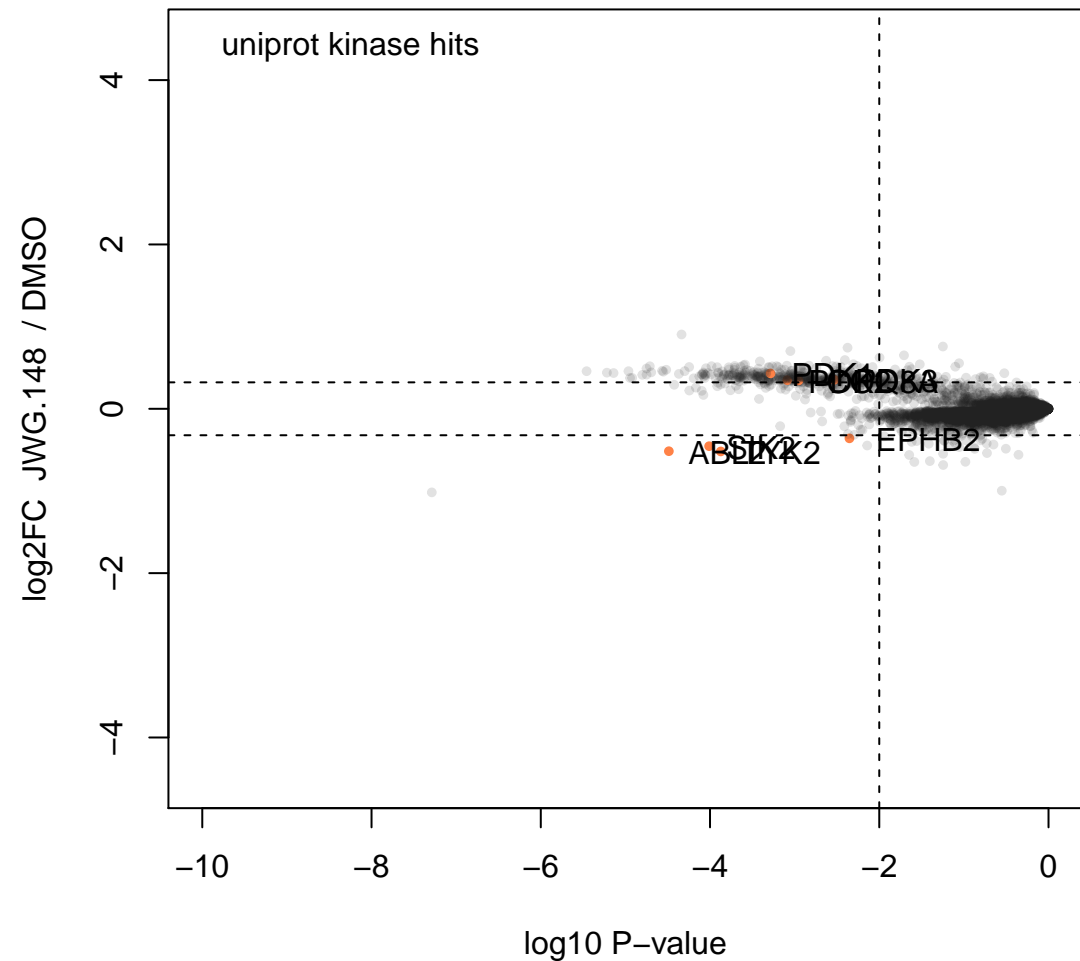

ZZ.01.31B (wp195)

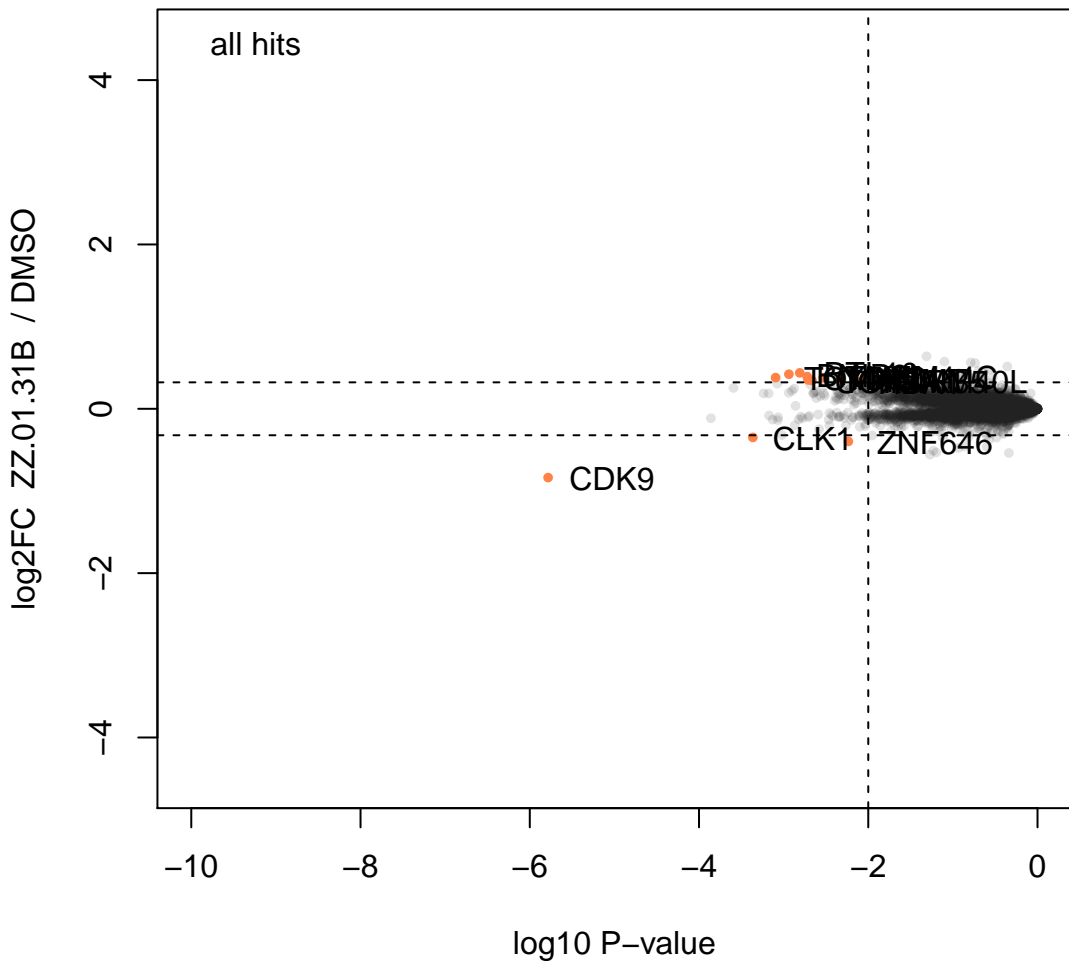

ZZ.01.31B (wp195)

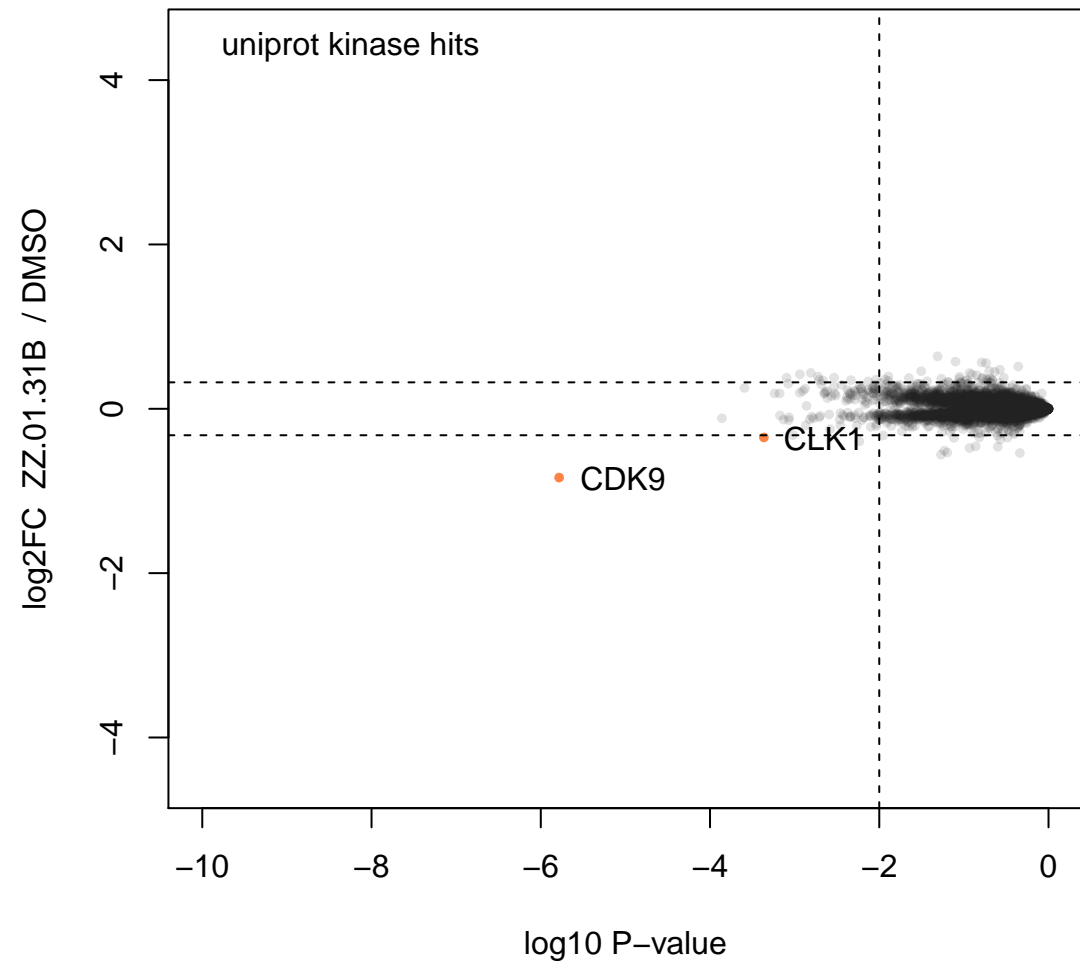

Supplement: NIHMS1641132-supplement-Data_S1.pdf [file NIHMS1641132-supplement-Data_S1.pdf]
